# Supplementary material for: Endogenous protein tagging in medaka using a simplified CRISPR/Cas9 knock-in approach
Source: eLife journal article supplement (doi:10.7554/elife.75050), 2021-12-06
Supplement: supp [file elife-75050-supp-v2.zip]

Archive with 31 entries (31 files):
- elife_poa_e75050_Figure_1_figure_supplement_1.pdf
- elife_poa_e75050_Figure_1_figure_supplement_2.pdf
- elife_poa_e75050_Figure_1_figure_supplement_3.pdf
- elife_poa_e75050_Figure_2_figure_supplement_1.pdf
- elife_poa_e75050_Figure_2_figure_supplement_2.pdf
- elife_poa_e75050_Figure_2_figure_supplement_3.pdf
- elife_poa_e75050_Figure_2_figure_supplement_4.pdf
- elife_poa_e75050_Figure_3_figure_supplement_1.pdf
- elife_poa_e75050_Figure_4_figure_supplement_1.pdf
- elife_poa_e75050_Figure_4_figure_supplement_2.pdf
- elife_poa_e75050_Figure_4_figure_supplement_3.pdf
- elife_poa_e75050_Supplementary_file_1.docx
- elife_poa_e75050_Supplementary_file_2.docx
- elife_poa_e75050_Supplementary_file_3.xlsx
- elife_poa_e75050_Supplementary_file_4.xlsx
- elife_poa_e75050_Video_1.avi
- elife_poa_e75050_Video_2.avi
- elife_poa_e75050_Video_3.mov
- elife_poa_e75050_Video_4.avi
- elife_poa_e75050_Video_5.avi
- elife_poa_e75050_Video_6.avi
- elife_poa_e75050_Video_7.avi
- elife_poa_e75050_Video_8.avi
- elife_poa_e75050_Video_9.avi
- elife_poa_e75050_Video_10.avi
- elife_poa_e75050_Video_11.avi
- elife_poa_e75050_Video_12.avi
- elife_poa_e75050_Video_13.mov
- elife_poa_e75050_Video_14.mov
- elife_poa_e75050_Transparent_Reporting_File.docx
- elife_poa_e75050_Source_code_1.unk
