# Supplementary material for: Endogenous protein tagging in medaka using a simplified CRISPR/Cas9 knock-in approach
Source: eLife journal article supplement (doi:10.7554/elife.75050), 2021-12-06
Supplement: supp [file elife-75050-supp-v2.zip › elife_poa_e75050_Source_code_1.unk]

{
 "cells": [
  {
   "cell_type": "code",
   "execution_count": 6,
   "metadata": {},
   "outputs": [
    {
     "name": "stdout",
     "output_type": "stream",
     "text": [
      "/Users/seleit/Desktop/t\n"
     ]
    }
   ],
   "source": [
    "cd /Users/seleit/Desktop/t"
   ]
  },
  {
   "cell_type": "code",
   "execution_count": 7,
   "metadata": {},
   "outputs": [],
   "source": [
    "import sys,os\n",
    "from pathlib import Path\n",
    "\n",
    "import numpy as np\n",
    "from os import path,walk\n",
    "import matplotlib.pyplot as plt\n",
    "from skimage import io\n",
    "import pandas as pd"
   ]
  },
  {
   "cell_type": "code",
   "execution_count": 8,
   "metadata": {},
   "outputs": [],
   "source": [
    "def figsave_to_tif(input_string):   #this function strings together individual tiffs to a single movie\n",
    "\n",
    " p = Path(wdir)\n",
    " figure_names = list( p.glob(input_string) )     #make list of files with input_string in filename\n",
    " if len(figure_names) == 0:\n",
    "  print('Found no input files.. exiting!')\n",
    "  sys.exit(1)\n",
    "\n",
    " figure_names.sort()\n",
    "\n",
    " figure_path = os.path.join( wdir, figure_names[0].name )\n",
    " figure = io.imread(figure_path, plugin=\"tifffile\")      #read first figure to extract size of matrix\n",
    "\n",
    " mat = np.zeros([len(figure_names),figure.shape[0],figure.shape[1],figure.shape[2]], dtype = np.uint8)       #initialize matrix for movie, 8bit color\n",
    "\n",
    " for index,k in enumerate(figure_names):     #loop over frames\n",
    "\n",
    "  figure_name = k.name \n",
    "\n",
    "  figure_path = os.path.join( wdir, figure_name )\n",
    "  mat[index,:,:,:] = io.imread(figure_path, plugin=\"tifffile\")\n",
    "  os.remove(figure_path)      #remove figure tif after addition to matrix\n",
    "\n",
    " out_name = input_string.replace('*','')[0:]\n",
    " out_path1 = os.path.join(wdir, 'out_'+out_name)\n",
    " io.imsave(out_path1, mat)       #save movie as tif, 8bit color\n",
    " print('written',out_path1)"
   ]
  },
  {
   "cell_type": "code",
   "execution_count": 15,
   "metadata": {},
   "outputs": [
    {
     "name": "stderr",
     "output_type": "stream",
     "text": [
      "/opt/anaconda3/lib/python3.7/site-packages/ipykernel_launcher.py:11: RuntimeWarning: More than 20 figures have been opened. Figures created through the pyplot interface (`matplotlib.pyplot.figure`) are retained until explicitly closed and may consume too much memory. (To control this warning, see the rcParam `figure.max_open_warning`).\n",
      "  # This is added back by InteractiveShellApp.init_path()\n"
     ]
    },
    {
     "name": "stdout",
     "output_type": "stream",
     "text": [
      "written /Users/seleit/Desktop/t/out_some_string_1_.tif\n",
      "bins used for histogram were [  0.           2.08333333   4.16666667   6.25         8.33333333\n",
      "  10.41666667  12.5         14.58333333  16.66666667  18.75\n",
      "  20.83333333  22.91666667  25.          27.08333333  29.16666667\n",
      "  31.25        33.33333333  35.41666667  37.5         39.58333333\n",
      "  41.66666667  43.75        45.83333333  47.91666667  50.\n",
      "  52.08333333  54.16666667  56.25        58.33333333  60.41666667\n",
      "  62.5         64.58333333  66.66666667  68.75        70.83333333\n",
      "  72.91666667  75.          77.08333333  79.16666667  81.25\n",
      "  83.33333333  85.41666667  87.5         89.58333333  91.66666667\n",
      "  93.75        95.83333333  97.91666667 100.         102.08333333\n",
      " 104.16666667 106.25       108.33333333 110.41666667 112.5\n",
      " 114.58333333 116.66666667 118.75       120.83333333 122.91666667\n",
      " 125.         127.08333333 129.16666667 131.25       133.33333333\n",
      " 135.41666667 137.5        139.58333333 141.66666667 143.75\n",
      " 145.83333333 147.91666667 150.         152.08333333 154.16666667\n",
      " 156.25       158.33333333 160.41666667 162.5        164.58333333\n",
      " 166.66666667 168.75       170.83333333 172.91666667 175.\n",
      " 177.08333333 179.16666667 181.25       183.33333333 185.41666667\n",
      " 187.5        189.58333333 191.66666667 193.75       195.83333333\n",
      " 197.91666667 200.         202.08333333 204.16666667 206.25\n",
      " 208.33333333 210.41666667 212.5        214.58333333 216.66666667\n",
      " 218.75       220.83333333 222.91666667 225.         227.08333333\n",
      " 229.16666667 231.25       233.33333333 235.41666667 237.5\n",
      " 239.58333333 241.66666667 243.75       245.83333333 247.91666667\n",
      " 250.        ]\n"
     ]
    },
    {
     "data": {
      "image/png": "iVBORw0KGgoAAAANSUhEUgAAAs8AAAKvCAYAAACVhiLtAAAABHNCSVQICAgIfAhkiAAAAAlwSFlzAAALEgAACxIB0t1+/AAAADh0RVh0U29mdHdhcmUAbWF0cGxvdGxpYiB2ZXJzaW9uMy4xLjMsIGh0dHA6Ly9tYXRwbG90bGliLm9yZy+AADFEAAAeIUlEQVR4nO3dbaxl51nf4f9dj3EIpHbe5dqWJoJpS6DCSafGUqQqJBQcD8JGIshRlbiRq6GSIwWBWiZ8AaRGGqSCAalYMjiNUwGJBUSxGJeSOokQH/IyDsaxY6JMk2k82LJFk5ggi1Qe7n44a5pT+4zP7Tkve16uSzraez97rX2eIy/v+ek566xd3R0AAGBz/2DVEwAAgHOFeAYAgCHxDAAAQ+IZAACGxDMAAAyJZwAAGBrHc1VdVFV/XlV/tDx+TVV9qqq+WFUfqqpvW8YvWR4fW57fuzNTBwCA3fVCVp7fneSRdY9/Oclt3b0vydeS3LKM35Lka9393UluW7YDAIBz3iieq+rKJAeS/PbyuJK8KcnvL5vcleTG5f4Ny+Msz7952R4AAM5pe4bb/VqS/5DkJcvjlyf5enc/szw+keSK5f4VSR5Nku5+pqqeWrb/6/UvWFUHkxxMkrr4Rf/84pdf+Zxv+s+uuHT8gwAAwGbuv//+v+7uV57p/pvGc1X9aJInu/v+qnrjqeENNu3Bc98a6L4jyR1Jcsnl+/rym3/tOTsdPXxgs+kBAMBYVf2vrew/WXl+Q5Ifq6rrk7woyT/M2kr0ZVW1Z1l9vjLJY8v2J5JcleREVe1JcmmSr25lkgAAcDbY9Jzn7n5Pd1/Z3XuT3JTkY939r5N8PMlPLJvdnOQjy/17lsdZnv9Ydz9n5RkAAM41W7nO888l+ZmqOpa1c5rvXMbvTPLyZfxnkhza2hQBAODsMP2DwSRJd38iySeW+19Kcs0G2/xdkrduw9wAAOCs4hMGAQBgSDwDAMCQeAYAgCHxDAAAQ+IZAACGxDMAAAyJZwAAGBLPAAAwJJ4BAGBIPAMAwJB4BgCAIfEMAABD4hkAAIbEMwAADIlnAAAYEs8AADAkngEAYEg8AwDAkHgGAIAh8QwAAEPiGQAAhsQzAAAMiWcAABgSzwAAMCSeAQBgSDwDAMCQeAYAgCHxDAAAQ+IZAACGxDMAAAyJZwAAGBLPAAAwJJ4BAGBIPAMAwJB4BgCAIfEMAABD4hkAAIbEMwAADIlnAAAYEs8AADAkngEAYEg8AwDAkHgGAIAh8QwAAEPiGQAAhsQzAAAMiWcAABgSzwAAMCSeAQBgSDwDAMCQeAYAgCHxDAAAQ3tWPYHns/fQkeeMHT98YAUzAQAAK88AADAmngEAYEg8AwDAkHgGAIAh8QwAAEPiGQAAhsQzAAAMiWcAABgSzwAAMCSeAQBgSDwDAMCQeAYAgCHxDAAAQ+IZAACGxDMAAAyJZwAAGBLPAAAwJJ4BAGBIPAMAwJB4BgCAoU3juapeVFWfrqq/qKqHq+qXlvH3V9WXq+qB5evqZbyq6jeq6lhVPVhVr9/pHwIAAHbDnsE230zypu7+26q6OMmfVdV/W5779939+8/a/i1J9i1fP5Dk9uUWAADOaZuuPPeav10eXrx89fPsckOSDyz7fTLJZVV1+danCgAAqzU657mqLqqqB5I8meSj3f2p5an3Lqdm3FZVlyxjVyR5dN3uJ5axZ7/mwao6WlVHTz791BZ+BAAA2B2jeO7uk919dZIrk1xTVd+X5D1J/mmSf5HkZUl+btm8NnqJDV7zju7e3937L3rxpWc0eQAA2E0v6Gob3f31JJ9Icl13P76cmvHNJP8lyTXLZieSXLVutyuTPLYNcwUAgJWaXG3jlVV12XL/25P8UJK/PHUec1VVkhuTPLTsck+SdyxX3bg2yVPd/fiOzB4AAHbR5Goblye5q6ouylps393df1RVH6uqV2btNI0Hkvy7Zft7k1yf5FiSp5O8c/unDQAAu2/TeO7uB5O8boPxN51m+05y69anBgAAZxefMAgAAEPiGQAAhsQzAAAMiWcAABgSzwAAMCSeAQBgSDwDAMCQeAYAgCHxDAAAQ+IZAACGxDMAAAyJZwAAGBLPAAAwJJ4BAGBIPAMAwJB4BgCAIfEMAABD4hkAAIbEMwAADIlnAAAYEs8AADAkngEAYEg8AwDAkHgGAIAh8QwAAEPiGQAAhsQzAAAMiWcAABgSzwAAMCSeAQBgSDwDAMCQeAYAgCHxDAAAQ+IZAACGxDMAAAyJZwAAGBLPAAAwJJ4BAGBIPAMAwJB4BgCAIfEMAABD4hkAAIbEMwAADIlnAAAYEs8AADAkngEAYEg8AwDAkHgGAIAh8QwAAEPiGQAAhsQzAAAMiWcAABgSzwAAMCSeAQBgSDwDAMCQeAYAgCHxDAAAQ+IZAACGxDMAAAyJZwAAGBLPAAAwJJ4BAGBIPAMAwJB4BgCAIfEMAABD4hkAAIbEMwAADIlnAAAYEs8AADAkngEAYEg8AwDAkHgGAIChTeO5ql5UVZ+uqr+oqoer6peW8ddU1aeq6otV9aGq+rZl/JLl8bHl+b07+yMAAMDumKw8fzPJm7r7+5NcneS6qro2yS8nua279yX5WpJblu1vSfK17v7uJLct2wEAwDlv03juNX+7PLx4+eokb0ry+8v4XUluXO7fsDzO8vybq6q2bcYAALAio3Oeq+qiqnogyZNJPprkfyb5enc/s2xyIskVy/0rkjyaJMvzTyV5+XZOGgAAVmEUz919sruvTnJlkmuSfM9Gmy23G60y97MHqupgVR2tqqMnn35qOl8AAFiZF3S1je7+epJPJLk2yWVVtWd56sokjy33TyS5KkmW5y9N8tUNXuuO7t7f3fsvevGlZzZ7AADYRZOrbbyyqi5b7n97kh9K8kiSjyf5iWWzm5N8ZLl/z/I4y/Mf6+7nrDwDAMC5Zs/mm+TyJHdV1UVZi+27u/uPqurzST5YVf8xyZ8nuXPZ/s4k/7WqjmVtxfmmHZg3AADsuk3jubsfTPK6Dca/lLXzn589/ndJ3rotswMAgLOITxgEAIAh8QwAAEPiGQAAhsQzAAAMiWcAABgSzwAAMCSeAQBgSDwDAMCQeAYAgCHxDAAAQ+IZAACGxDMAAAyJZwAAGBLPAAAwJJ4BAGBIPAMAwJB4BgCAIfEMAABD4hkAAIbEMwAADIlnAAAYEs8AADAkngEAYEg8AwDAkHgGAIAh8QwAAEPiGQAAhsQzAAAMiWcAABgSzwAAMCSeAQBgSDwDAMCQeAYAgCHxDAAAQ+IZAACGxDMAAAyJZwAAGBLPAAAwJJ4BAGBIPAMAwNCeVU/ghdp76MiG48cPH9jlmQAAcKGx8gwAAEPiGQAAhsQzAAAMiWcAABgSzwAAMCSeAQBgSDwDAMCQeAYAgCHxDAAAQ+IZAACGxDMAAAyJZwAAGBLPAAAwJJ4BAGBIPAMAwJB4BgCAIfEMAABD4hkAAIbEMwAADO1Z9QS2y95DRzYcP374wC7PBACA85WVZwAAGBLPAAAwJJ4BAGBIPAMAwJB4BgCAIfEMAABD4hkAAIbEMwAADIlnAAAYEs8AADAkngEAYEg8AwDA0KbxXFVXVdXHq+qRqnq4qt69jP9iVf1VVT2wfF2/bp/3VNWxqvpCVf3ITv4AAACwW/YMtnkmyc9292er6iVJ7q+qjy7P3dbd/2n9xlX12iQ3JfneJP8oyf+oqn/c3Se3c+IAALDbNl157u7Hu/uzy/1vJHkkyRXPs8sNST7Y3d/s7i8nOZbkmu2YLAAArNILOue5qvYmeV2STy1D76qqB6vqfVX10mXsiiSPrtvtRDaI7ao6WFVHq+royaefesETBwCA3TaO56r6ziR/kOSnu/tvktye5LuSXJ3k8SS/cmrTDXbv5wx039Hd+7t7/0UvvvQFTxwAAHbbKJ6r6uKshfPvdPcfJkl3P9HdJ7v775P8Vr51asaJJFet2/3KJI9t35QBAGA1JlfbqCR3Jnmku3913fjl6zb78SQPLffvSXJTVV1SVa9Jsi/Jp7dvygAAsBqTq228Icnbk3yuqh5Yxn4+yduq6uqsnZJxPMlPJUl3P1xVdyf5fNau1HGrK20AAHA+2DSeu/vPsvF5zPc+zz7vTfLeLcwLAADOOj5hEAAAhsQzAAAMiWcAABgSzwAAMCSeAQBgSDwDAMCQeAYAgCHxDAAAQ+IZAACGxDMAAAyJZwAAGBLPAAAwJJ4BAGBIPAMAwJB4BgCAIfEMAABD4hkAAIbEMwAADIlnAAAYEs8AADAkngEAYEg8AwDAkHgGAIAh8QwAAEPiGQAAhsQzAAAMiWcAABgSzwAAMCSeAQBgSDwDAMCQeAYAgCHxDAAAQ+IZAACGxDMAAAyJZwAAGBLPAAAwJJ4BAGBIPAMAwJB4BgCAIfEMAABD4hkAAIbEMwAADIlnAAAYEs8AADAkngEAYEg8AwDAkHgGAIAh8QwAAEPiGQAAhsQzAAAMiWcAABjas+oJnE32HjrynLHjhw+sYCYAAJyNrDwDAMDQeb/ybDUZAIDtYuUZAACGxDMAAAyJZwAAGBLPAAAwJJ4BAGBIPAMAwJB4BgCAIfEMAABD4hkAAIbEMwAADIlnAAAYEs8AADC0Z9UTWIW9h46segoAAJyDrDwDAMCQeAYAgCHxDAAAQ+IZAACGxDMAAAxtGs9VdVVVfbyqHqmqh6vq3cv4y6rqo1X1xeX2pct4VdVvVNWxqnqwql6/0z8EAADshsnK8zNJfra7vyfJtUlurarXJjmU5L7u3pfkvuVxkrwlyb7l62CS27d91gAAsAKbxnN3P97dn13ufyPJI0muSHJDkruWze5KcuNy/4YkH+g1n0xyWVVdvu0zBwCAXfaCznmuqr1JXpfkU0le3d2PJ2uBneRVy2ZXJHl03W4nljEAADinjeO5qr4zyR8k+enu/pvn23SDsd7g9Q5W1dGqOnry6aem0wAAgJUZxXNVXZy1cP6d7v7DZfiJU6djLLdPLuMnkly1bvcrkzz27Nfs7ju6e39377/oxZee6fwBAGDXTK62UUnuTPJId//quqfuSXLzcv/mJB9ZN/6O5aob1yZ56tTpHQAAcC7bM9jmDUnenuRzVfXAMvbzSQ4nubuqbknylSRvXZ67N8n1SY4leTrJO7d1xgAAsCKbxnN3/1k2Po85Sd68wfad5NYtzgsAAM46PmEQAACGxDMAAAyJZwAAGBLPAAAwJJ4BAGBIPAMAwNDkOs/sor2Hjmw4fvzwgV2eCQAAz2blGQAAhsQzAAAMiWcAABgSzwAAMCSeAQBgSDwDAMCQeAYAgCHXed5GrtEMAHB+s/IMAABD4hkAAIbEMwAADIlnAAAYEs8AADAkngEAYEg8AwDAkHgGAIAh8QwAAEPiGQAAhsQzAAAMiWcAABgSzwAAMCSeAQBgSDwDAMCQeAYAgCHxDAAAQ+IZAACGxDMAAAztWfUEznZ7Dx3ZcPz44QO7+hoAAKyelWcAABgSzwAAMCSeAQBgSDwDAMCQeAYAgCFX2zhDp7uCBgAA5y8rzwAAMCSeAQBgSDwDAMCQc55XyHnTAADnFivPAAAwJJ4BAGBIPAMAwJB4BgCAIfEMAABD4hkAAIbEMwAADIlnAAAYEs8AADAkngEAYEg8AwDAkHgGAIAh8QwAAEPiGQAAhsQzAAAMiWcAABgSzwAAMCSeAQBgSDwDAMCQeAYAgCHxDAAAQ+IZAACGxDMAAAyJZwAAGBLPAAAwJJ4BAGBIPAMAwJB4BgCAoU3juareV1VPVtVD68Z+sar+qqoeWL6uX/fce6rqWFV9oap+ZKcmDgAAu22y8vz+JNdtMH5bd1+9fN2bJFX12iQ3JfneZZ/frKqLtmuyAACwSpvGc3f/aZKvDl/vhiQf7O5vdveXkxxLcs0W5gcAAGeNrZzz/K6qenA5reOly9gVSR5dt82JZew5qupgVR2tqqMnn35qC9MAAIDdcabxfHuS70pydZLHk/zKMl4bbNsbvUB339Hd+7t7/0UvvvQMpwEAALvnjOK5u5/o7pPd/fdJfivfOjXjRJKr1m16ZZLHtjZFAAA4O5xRPFfV5ese/niSU1fiuCfJTVV1SVW9Jsm+JJ/e2hQBAODssGezDarq95K8MckrqupEkl9I8saqujprp2QcT/JTSdLdD1fV3Uk+n+SZJLd298mdmToAAOyuTeO5u9+2wfCdz7P9e5O8dyuTAgCAs5FPGAQAgCHxDAAAQ+IZAACGxDMAAAyJZwAAGBLPAAAwJJ4BAGBIPAMAwJB4BgCAIfEMAABD4hkAAIbEMwAADIlnAAAYEs8AADAkngEAYEg8AwDAkHgGAIAh8QwAAEPiGQAAhsQzAAAMiWcAABgSzwAAMLRn1RNgZu+hI88ZO374wApmAgBw4bLyDAAAQ+IZAACGxDMAAAyJZwAAGBLPAAAwJJ4BAGBIPAMAwJB4BgCAIfEMAABD4hkAAIbEMwAADIlnAAAYEs8AADAkngEAYEg8AwDAkHgGAIAh8QwAAEPiGQAAhsQzAAAMiWcAABgSzwAAMCSeAQBgSDwDAMCQeAYAgCHxDAAAQ+IZAACGxDMAAAyJZwAAGBLPAAAwJJ4BAGBIPAMAwJB4BgCAIfEMAABD4hkAAIbEMwAADIlnAAAYEs8AADAkngEAYEg8AwDAkHgGAIAh8QwAAEPiGQAAhsQzAAAMiWcAABgSzwAAMCSeAQBgSDwDAMCQeAYAgCHxDAAAQ3s226Cq3pfkR5M82d3ft4y9LMmHkuxNcjzJT3b316qqkvx6kuuTPJ3k33T3Z3dm6uw9dGTD8eOHD+zyTAAALgyTlef3J7nuWWOHktzX3fuS3Lc8TpK3JNm3fB1Mcvv2TBMAAFZv03ju7j9N8tVnDd+Q5K7l/l1Jblw3/oFe88kkl1XV5ds1WQAAWKUzPef51d39eJIst69axq9I8ui67U4sYwAAcM7b7j8YrA3GesMNqw5W1dGqOnry6ae2eRoAALD9zjSenzh1OsZy++QyfiLJVeu2uzLJYxu9QHff0d37u3v/RS++9AynAQAAu+dM4/meJDcv929O8pF14++oNdcmeerU6R0AAHCum1yq7veSvDHJK6rqRJJfSHI4yd1VdUuSryR567L5vVm7TN2xrF2q7p07MGcAAFiJTeO5u992mqfevMG2neTWrU4KAADORj5hEAAAhsQzAAAMiWcAABgSzwAAMCSeAQBgSDwDAMCQeAYAgCHxDAAAQ+IZAACGxDMAAAyJZwAAGBLPAAAwJJ4BAGBIPAMAwNCeVU+A7bf30JHnjB0/fGAFMwEAOL9YeQYAgCHxDAAAQ+IZAACGxDMAAAyJZwAAGBLPAAAwJJ4BAGBIPAMAwJB4BgCAIfEMAABD4hkAAIbEMwAADIlnAAAYEs8AADAkngEAYEg8AwDAkHgGAIAh8QwAAEPiGQAAhsQzAAAM7Vn1BNgdew8d2XD8+OEDuzwTAIBzl5VnAAAYEs8AADAkngEAYEg8AwDAkHgGAIAh8QwAAEPiGQAAhsQzAAAMiWcAABgSzwAAMCSeAQBgSDwDAMCQeAYAgCHxDAAAQ+IZAACGxDMAAAyJZwAAGBLPAAAwJJ4BAGBIPAMAwJB4BgCAoT2rngCrtffQkQ3Hjx8+sMszAQA4+1l5BgCAIfEMAABDTttgQxudzuFUDgDgQmflGQAAhsQzAAAMOW2DHeEqHgDA+cjKMwAADIlnAAAYEs8AADAkngEAYEg8AwDAkHgGAIAh8QwAAEOu88zY6a7dDABwobDyDAAAQ1taea6q40m+keRkkme6e39VvSzJh5LsTXI8yU9299e2Nk0AAFi97Vh5/sHuvrq79y+PDyW5r7v3JblveQwAAOe8nTht44Ykdy3370py4w58DwAA2HVbjedO8idVdX9VHVzGXt3djyfJcvuqjXasqoNVdbSqjp58+qktTgMAAHbeVq+28YbufqyqXpXko1X1l9Mdu/uOJHckySWX7+stzgMAAHbcllaeu/ux5fbJJB9Ock2SJ6rq8iRZbp/c6iQBAOBscMbxXFXfUVUvOXU/yQ8neSjJPUluXja7OclHtjpJAAA4G2zltI1XJ/lwVZ16nd/t7j+uqs8kubuqbknylSRv3fo0AQBg9c44nrv7S0m+f4Px/53kzVuZFAAAnI18wiAAAAxt9Wob8ILsPXRkvO3xwwd2cCYAAC+clWcAABgSzwAAMCSeAQBgSDwDAMCQeAYAgCHxDAAAQ+IZAACGxDMAAAyJZwAAGBLPAAAwJJ4BAGBIPAMAwJB4BgCAIfEMAABD4hkAAIbEMwAADIlnAAAY2rPqCcDp7D10ZMPx44cP7PJMAADWWHkGAIAh8QwAAEPiGQAAhsQzAAAMiWcAABgSzwAAMCSeAQBgSDwDAMCQeAYAgCHxDAAAQ+IZAACGxDMAAAyJZwAAGBLPAAAwJJ4BAGBoz6onAC/U3kNHnjN2/PCBFcwEALjQWHkGAIAh8QwAAENO2+C8ttEpHqfj1A8AYDNWngEAYMjKM5yB061oW70GgPOblWcAABgSzwAAMCSeAQBgSDwDAMCQeAYAgCFX2+C88EKu5wwAcKasPAMAwJB4BgCAIfEMAABD4hkAAIb8wSBswh8jAgCnWHkGAIAhK8+wjTZapT5++MAKZgIA7AQrzwAAMGTlGRbObQYANmPlGQAAhsQzAAAMiWcAABgSzwAAMCSeAQBgSDwDAMCQeAYAgCHXeYZzwOmuQe3TCwFgd4ln2GHCFwDOH07bAACAISvPcA7baFXbijYA7BwrzwAAMCSeAQBgyGkbsCJn8x8Sns1zA4BVsvIMAABDVp7hAna6FebteA2r1ACcj6w8AwDA0I6tPFfVdUl+PclFSX67uw/v1PeC88lWV4PP5pXgs3luADCxI/FcVRcl+c9J/lWSE0k+U1X3dPfnd+L7AZvbyVM0dtMLmYMoB2C77dRpG9ckOdbdX+ru/5Pkg0lu2KHvBQAAu6K6e/tftOonklzX3f92efz2JD/Q3e9at83BJAeXh9+X5KFtnwjnulck+etVT4KzjuOCjTgu2Ijjgo38k+5+yZnuvFPnPNcGY/9fpXf3HUnuSJKqOtrd+3doLpyjHBdsxHHBRhwXbMRxwUaq6uhW9t+p0zZOJLlq3eMrkzy2Q98LAAB2xU7F82eS7Kuq11TVtyW5Kck9O/S9AABgV+zIaRvd/UxVvSvJf8/apere190PP88ud+zEPDjnOS7YiOOCjTgu2Ijjgo1s6bjYkT8YBACA85FPGAQAgCHxDAAAQyuP56q6rqq+UFXHqurQqufD6lTV8ar6XFU9cOoyMlX1sqr6aFV9cbl96arnyc6qqvdV1ZNV9dC6sQ2Pg1rzG8v7x4NV9frVzZyddJrj4her6q+W94wHqur6dc+9ZzkuvlBVP7KaWbOTquqqqvp4VT1SVQ9X1buXce8XF7DnOS627f1ipfG87mO835LktUneVlWvXeWcWLkf7O6r112X81CS+7p7X5L7lsec396f5LpnjZ3uOHhLkn3L18Ekt+/SHNl9789zj4skuW15z7i6u+9NkuXfkZuSfO+yz28u/95wfnkmyc929/ckuTbJrct/e+8XF7bTHRfJNr1frHrl2cd4s5kbkty13L8ryY0rnAu7oLv/NMlXnzV8uuPghiQf6DWfTHJZVV2+OzNlN53muDidG5J8sLu/2d1fTnIsa//ecB7p7se7+7PL/W8keSTJFfF+cUF7nuPidF7w+8Wq4/mKJI+ue3wiz/8Dcn7rJH9SVfcvH9+eJK/u7seTtf8hkrxqZbNjlU53HHgP4V3Lr+Dft+60LsfFBaaq9iZ5XZJPxfsFi2cdF8k2vV+sOp43/RhvLihv6O7XZ+1Xa7dW1b9c9YQ463kPubDdnuS7klyd5PEkv7KMOy4uIFX1nUn+IMlPd/ffPN+mG4w5Ls5TGxwX2/Z+sep49jHe/D/d/dhy+2SSD2ft1yZPnPq12nL75OpmyAqd7jjwHnIB6+4nuvtkd/99kt/Kt37V6ri4QFTVxVkLpN/p7j9chr1fXOA2Oi628/1i1fHsY7xJklTVd1TVS07dT/LDSR7K2vFw87LZzUk+spoZsmKnOw7uSfKO5a/or03y1Klf13L+e9b5qj+etfeMZO24uKmqLqmq12TtD8Q+vdvzY2dVVSW5M8kj3f2r657yfnEBO91xsZ3vFzvy8dxTZ/Ax3py/Xp3kw2vHfPYk+d3u/uOq+kySu6vqliRfSfLWFc6RXVBVv5fkjUleUVUnkvxCksPZ+Di4N8n1WfsDj6eTvHPXJ8yuOM1x8caqujprv2I9nuSnkqS7H66qu5N8Pmt/eX9rd59cxbzZUW9I8vYkn6uqB5axn4/3iwvd6Y6Lt23X+4WP5wYAgKFVn7YBAADnDPEMAABD4hkAAIbEMwAADIlnAAAYEs8AADAkngEAYOj/Aq306lFj0ph0AAAAAElFTkSuQmCC\n",
      "text/plain": [
       "<Figure size 864x864 with 1 Axes>"
      ]
     },
     "metadata": {
      "needs_background": "light"
     },
     "output_type": "display_data"
    },
    {
     "data": {
      "image/png": "iVBORw0KGgoAAAANSUhEUgAAAs8AAAKvCAYAAACVhiLtAAAABHNCSVQICAgIfAhkiAAAAAlwSFlzAAALEgAACxIB0t1+/AAAADh0RVh0U29mdHdhcmUAbWF0cGxvdGxpYiB2ZXJzaW9uMy4xLjMsIGh0dHA6Ly9tYXRwbG90bGliLm9yZy+AADFEAAAd/ElEQVR4nO3df6xcZ53f8c+3dgibhSb8jFw7kiPWbYGt1lA3GylSlYXtEuJVHSRSBVUQoVSmUpBAi1oM/8BKRfJKhayQupFMkxIqFoj4oUQ43W4aQAipBBw2GxKyCBdcYmLFooABRZsq5ukf97jctce5X/v+mGv79ZKuZuaZM3Mfi8PkreeeOafGGAEAAJb29+Y9AQAAOFeIZwAAaBLPAADQJJ4BAKBJPAMAQJN4BgCApnY8V9WGqvqrqvri9PjKqnqwqr5XVZ+pqudN4xdPjw9Oz29dnakDAMDaOpOV53cleXzR4z9JctsYY1uSnya5ZRq/JclPxxi/leS2aTsAADjnteK5qrYk2ZnkP0+PK8nrknx22uSuJDdM93dNjzM9//ppewAAOKdtbG73p0n+fZIXTo9fkuRnY4xnp8eHk2ye7m9O8kSSjDGerapj0/Y/XvyGVbU7ye4kqYue/08vesmWU37pP9l8afsfAgAAS3nooYd+PMZ42dm+fsl4rqo/THJ0jPFQVV17YnjGpqPx3K8HxtiXZF+SXLxp29h085+e8qIDe3cuNT0AAGirqv+9nNd3Vp6vSfIvq+r6JM9P8vezsBJ9WVVtnFaftyR5ctr+cJIrkhyuqo1JLk3yk+VMEgAA1oMlj3keY7xvjLFljLE1yU1JvjTG+NdJvpzkzdNmNye5Z7p/7/Q40/NfGmOcsvIMAADnmuWc5/m9Sf6oqg5m4ZjmO6bxO5K8ZBr/oyR7ljdFAABYH7pfGEySjDG+kuQr0/3vJ7lqxjZ/m+TGFZgbAACsK64wCAAATeIZAACaxDMAADSJZwAAaBLPAADQJJ4BAKBJPAMAQJN4BgCAJvEMAABN4hkAAJrEMwAANIlnAABoEs8AANAkngEAoEk8AwBAk3gGAIAm8QwAAE3iGQAAmsQzAAA0iWcAAGgSzwAA0CSeAQCgSTwDAECTeAYAgCbxDAAATeIZAACaxDMAADSJZwAAaBLPAADQJJ4BAKBJPAMAQJN4BgCAJvEMAABN4hkAAJrEMwAANIlnAABoEs8AANAkngEAoEk8AwBAk3gGAIAm8QwAAE3iGQAAmsQzAAA0iWcAAGgSzwAA0CSeAQCgSTwDAECTeAYAgCbxDAAATeIZAACaxDMAADSJZwAAaBLPAADQJJ4BAKBJPAMAQJN4BgCAJvEMAABN4hkAAJrEMwAANIlnAABoEs8AANAkngEAoEk8AwBAk3gGAIAm8QwAAE3iGQAAmsQzAAA0iWcAAGgSzwAA0CSeAQCgSTwDAECTeAYAgCbxDAAATUvGc1U9v6q+UVV/XVWPVdUfT+Mfr6ofVNXD08/2abyq6qNVdbCqHqmq1672PwIAANbCxsY2zyR53Rjjl1V1UZKvVdV/m577d2OMz560/RuTbJt+fjfJ7dMtAACc05ZceR4Lfjk9vGj6Gc/xkl1JPjG97utJLquqTcufKgAAzFfrmOeq2lBVDyc5muT+McaD01Mfmg7NuK2qLp7GNid5YtHLD09jJ7/n7qo6UFUHjj99bBn/BAAAWButeB5jHB9jbE+yJclVVfXbSd6X5B8n+WdJXpzkvdPmNestZrznvjHGjjHGjg2XXHpWkwcAgLV0RmfbGGP8LMlXklw3xjgyHZrxTJL/kuSqabPDSa5Y9LItSZ5cgbkCAMBcdc628bKqumy6/xtJfj/J35w4jrmqKskNSR6dXnJvkrdNZ924OsmxMcaRVZk9AACsoc7ZNjYluauqNmQhtu8eY3yxqr5UVS/LwmEaDyf5t9P29yW5PsnBJE8nefvKTxsAANbekvE8xngkyWtmjL/uNNuPJLcuf2oAALC+uMIgAAA0iWcAAGgSzwAA0CSeAQCgSTwDAECTeAYAgCbxDAAATeIZAACaxDMAADSJZwAAaBLPAADQJJ4BAKBJPAMAQJN4BgCAJvEMAABN4hkAAJrEMwAANIlnAABoEs8AANAkngEAoEk8AwBAk3gGAIAm8QwAAE3iGQAAmsQzAAA0iWcAAGgSzwAA0CSeAQCgSTwDAECTeAYAgCbxDAAATeIZAACaxDMAADSJZwAAaBLPAADQJJ4BAKBJPAMAQJN4BgCAJvEMAABN4hkAAJrEMwAANIlnAABoEs8AANAkngEAoEk8AwBAk3gGAIAm8QwAAE3iGQAAmsQzAAA0iWcAAGgSzwAA0CSeAQCgSTwDAECTeAYAgCbxDAAATeIZAACaxDMAADSJZwAAaBLPAADQJJ4BAKBJPAMAQJN4BgCAJvEMAABN4hkAAJrEMwAANIlnAABoEs8AANAkngEAoEk8AwBAk3gGAIAm8QwAAE3iGQAAmpaM56p6flV9o6r+uqoeq6o/nsavrKoHq+p7VfWZqnreNH7x9Pjg9PzW1f0nAADA2uisPD+T5HVjjN9Jsj3JdVV1dZI/SXLbGGNbkp8muWXa/pYkPx1j/FaS26btAADgnLdkPI8Fv5weXjT9jCSvS/LZafyuJDdM93dNjzM9//qqqhWbMQAAzEnrmOeq2lBVDyc5muT+JP8ryc/GGM9OmxxOsnm6vznJE0kyPX8syUtWctIAADAPrXgeYxwfY2xPsiXJVUleOWuz6XbWKvM4eaCqdlfVgao6cPzpY935AgDA3JzR2TbGGD9L8pUkVye5rKo2Tk9tSfLkdP9wkiuSZHr+0iQ/mfFe+8YYO8YYOzZccunZzR4AANZQ52wbL6uqy6b7v5Hk95M8nuTLSd48bXZzknum+/dOjzM9/6UxxikrzwAAcK7ZuPQm2ZTkrqrakIXYvnuM8cWq+k6ST1fVf0jyV0numLa/I8l/raqDWVhxvmkV5g0AAGtuyXgeYzyS5DUzxr+fheOfTx7/2yQ3rsjsAABgHXGFQQAAaOoctjE3W/fsP2Xs0N6dc5gJAABYeQYAgDbxDAAATeIZAACaxDMAADSJZwAAaBLPAADQJJ4BAKBJPAMAQJN4BgCAJvEMAABN4hkAAJrEMwAANIlnAABoEs8AANAkngEAoEk8AwBAk3gGAIAm8QwAAE3iGQAAmsQzAAA0iWcAAGgSzwAA0CSeAQCgSTwDAECTeAYAgCbxDAAATeIZAACaxDMAADSJZwAAaBLPAADQJJ4BAKBJPAMAQJN4BgCAJvEMAABN4hkAAJrEMwAANIlnAABoEs8AANAkngEAoEk8AwBAk3gGAIAm8QwAAE3iGQAAmsQzAAA0iWcAAGgSzwAA0CSeAQCgSTwDAECTeAYAgCbxDAAATeIZAACaxDMAADSJZwAAaBLPAADQJJ4BAKBJPAMAQJN4BgCAJvEMAABN4hkAAJrEMwAANIlnAABoEs8AANAkngEAoGnjvCdwprbu2T9z/NDenWs8EwAALjRWngEAoEk8AwBAk3gGAIAm8QwAAE3iGQAAmsQzAAA0iWcAAGhaMp6r6oqq+nJVPV5Vj1XVu6bxD1bVj6rq4enn+kWveV9VHayq71bVG1bzHwAAAGulc5GUZ5O8Z4zxrap6YZKHqur+6bnbxhj/cfHGVfWqJDcleXWSf5Dkf1TVPxxjHF/JiQMAwFpbcuV5jHFkjPGt6f4vkjyeZPNzvGRXkk+PMZ4ZY/wgycEkV63EZAEAYJ7O6Jjnqtqa5DVJHpyG3llVj1TVnVX1omlsc5InFr3scGbEdlXtrqoDVXXg+NPHznjiAACw1trxXFUvSPK5JO8eY/w8ye1JXpFke5IjST58YtMZLx+nDIyxb4yxY4yxY8Mll57xxAEAYK214rmqLspCOH9yjPH5JBljPDXGOD7G+FWSj+XXh2YcTnLFopdvSfLkyk0ZAADmo3O2jUpyR5LHxxgfWTS+adFmb0ry6HT/3iQ3VdXFVXVlkm1JvrFyUwYAgPnonG3jmiRvTfLtqnp4Gnt/krdU1fYsHJJxKMk7kmSM8VhV3Z3kO1k4U8etzrQBAMD5YMl4HmN8LbOPY77vOV7zoSQfWsa8AABg3XGFQQAAaBLPAADQJJ4BAKBJPAMAQJN4BgCAJvEMAABN4hkAAJrEMwAANIlnAABoEs8AANAkngEAoEk8AwBAk3gGAIAm8QwAAE3iGQAAmsQzAAA0iWcAAGgSzwAA0CSeAQCgSTwDAECTeAYAgCbxDAAATeIZAACaxDMAADSJZwAAaBLPAADQJJ4BAKBJPAMAQJN4BgCAJvEMAABN4hkAAJrEMwAANIlnAABoEs8AANAkngEAoEk8AwBAk3gGAIAm8QwAAE3iGQAAmsQzAAA0iWcAAGgSzwAA0CSeAQCgSTwDAECTeAYAgCbxDAAATeIZAACaxDMAADSJZwAAaBLPAADQJJ4BAKBJPAMAQJN4BgCAJvEMAABN4hkAAJrEMwAANG2c9wT4u7bu2T9z/NDenWs8EwAATmblGQAAmsQzAAA0iWcAAGgSzwAA0CSeAQCgSTwDAECTeAYAgCbxDAAATeIZAACaxDMAADSJZwAAaBLPAADQJJ4BAKBJPAMAQJN4BgCApiXjuaquqKovV9XjVfVYVb1rGn9xVd1fVd+bbl80jVdVfbSqDlbVI1X12tX+RwAAwFrorDw/m+Q9Y4xXJrk6ya1V9aoke5I8MMbYluSB6XGSvDHJtulnd5LbV3zWAAAwBxuX2mCMcSTJken+L6rq8SSbk+xKcu202V1JvpLkvdP4J8YYI8nXq+qyqto0vc+a27pn/yljh/bunMNMAAA4153RMc9VtTXJa5I8mOTyE0E83b582mxzkicWvezwNAYAAOe0djxX1QuSfC7Ju8cYP3+uTWeMjRnvt7uqDlTVgeNPH+tOAwAA5qYVz1V1URbC+ZNjjM9Pw09V1abp+U1Jjk7jh5NcsejlW5I8efJ7jjH2jTF2jDF2bLjk0rOdPwAArJnO2TYqyR1JHh9jfGTRU/cmuXm6f3OSexaNv20668bVSY7N63hnAABYSUt+YTDJNUnemuTbVfXwNPb+JHuT3F1VtyT5YZIbp+fuS3J9koNJnk7y9hWdMQAAzEnnbBtfy+zjmJPk9TO2H0luXea8AABg3XGFQQAAaBLPAADQJJ4BAKBJPAMAQJN4BgCAJvEMAABN4hkAAJrEMwAANIlnAABoEs8AANAkngEAoEk8AwBAk3gGAIAm8QwAAE3iGQAAmsQzAAA0iWcAAGgSzwAA0CSeAQCgSTwDAECTeAYAgKaN857AuWrrnv2njB3au3MOMwEAYK1YeQYAgCbxDAAATefNYRuzDqMAAICVZOUZAACaxDMAADSdN4dtrBaHgwAAcIKVZwAAaBLPAADQJJ4BAKDJMc+LOL4ZAIDnYuUZAACaxDMAADSJZwAAaBLPAADQJJ4BAKBJPAMAQJN4BgCAJvEMAABN4hkAAJrEMwAANLk89xy5HDgAwLnFyjMAADSJZwAAaBLPAADQJJ4BAKBJPAMAQJOzbayg050949DenWs8EwAAVoOVZwAAaBLPAADQJJ4BAKBJPAMAQJN4BgCAJvEMAABNTlW3Bk53CjsAAM4tVp4BAKBJPAMAQJN4BgCAJvEMAABN4hkAAJrEMwAANIlnAABoEs8AANAkngEAoEk8AwBAk3gGAIAm8QwAAE3iGQAAmsQzAAA0iWcAAGgSzwAA0CSeAQCgacl4rqo7q+poVT26aOyDVfWjqnp4+rl+0XPvq6qDVfXdqnrDak0cAADWWmfl+eNJrpsxftsYY/v0c1+SVNWrktyU5NXTa/6sqjas1GQBAGCeNi61wRjjq1W1tfl+u5J8eozxTJIfVNXBJFcl+Z9nPcNVsHXP/nlPAQCAc9Byjnl+Z1U9Mh3W8aJpbHOSJxZtc3gaO0VV7a6qA1V14PjTx5YxDQAAWBtnG8+3J3lFku1JjiT58DReM7Yds95gjLFvjLFjjLFjwyWXnuU0AABg7ZxVPI8xnhpjHB9j/CrJx7JwaEaysNJ8xaJNtyR5cnlTBACA9eGs4rmqNi16+KYkJ87EcW+Sm6rq4qq6Msm2JN9Y3hQBAGB9WPILg1X1qSTXJnlpVR1O8oEk11bV9iwcknEoyTuSZIzxWFXdneQ7SZ5NcusY4/jqTB0AANZW52wbb5kxfMdzbP+hJB9azqQAAGA9coVBAABoEs8AANC05GEbrA+zLuxyaO/OOcwEAODCZeUZAACaxDMAADSJZwAAaBLPAADQJJ4BAKBJPAMAQJN4BgCAJvEMAABN4hkAAJrEMwAANIlnAABoEs8AANAkngEAoEk8AwBAk3gGAIAm8QwAAE3iGQAAmsQzAAA0iWcAAGgSzwAA0CSeAQCgSTwDAECTeAYAgCbxDAAATeIZAACaxDMAADSJZwAAaBLPAADQJJ4BAKBJPAMAQJN4BgCAJvEMAABN4hkAAJrEMwAANIlnAABoEs8AANAkngEAoGnjvCfA2du6Z//M8UN7d67xTAAALgxWngEAoEk8AwBAk3gGAIAm8QwAAE3iGQAAmsQzAAA0iWcAAGgSzwAA0CSeAQCgSTwDAECTeAYAgCbxDAAATeIZAACaxDMAADRtnPcEWHlb9+w/ZezQ3p1zmAkAwPnFyjMAADSJZwAAaBLPAADQJJ4BAKBJPAMAQJN4BgCAJvEMAABN4hkAAJrEMwAANIlnAABoEs8AANAkngEAoGnjvCfA2ti6Z//M8UN7d67xTAAAzl1WngEAoEk8AwBAk3gGAICmJeO5qu6sqqNV9eiisRdX1f1V9b3p9kXTeFXVR6vqYFU9UlWvXc3JAwDAWuqsPH88yXUnje1J8sAYY1uSB6bHSfLGJNumn91Jbl+ZaQIAwPwtGc9jjK8m+clJw7uS3DXdvyvJDYvGPzEWfD3JZVW1aaUmCwAA83S2xzxfPsY4kiTT7cun8c1Jnli03eFpDAAAznkr/YXBmjE2Zm5YtbuqDlTVgeNPH1vhaQAAwMo723h+6sThGNPt0Wn8cJIrFm23JcmTs95gjLFvjLFjjLFjwyWXnuU0AABg7ZxtPN+b5Obp/s1J7lk0/rbprBtXJzl24vAOAAA41y15ee6q+lSSa5O8tKoOJ/lAkr1J7q6qW5L8MMmN0+b3Jbk+ycEkTyd5+yrMGQAA5mLJeB5jvOU0T71+xrYjya3LnRQAAKxHrjAIAABN4hkAAJrEMwAANIlnAABoEs8AANAkngEAoEk8AwBAk3gGAIAm8QwAAE3iGQAAmsQzAAA0iWcAAGgSzwAA0CSeAQCgaeO8J8C5Y+ue/TPHD+3ducYzAQCYDyvPAADQJJ4BAKBJPAMAQJN4BgCAJvEMAABN4hkAAJrEMwAANIlnAABoEs8AANAkngEAoEk8AwBAk3gGAICmjfOeAOvT1j375z0FAIB1x8ozAAA0iWcAAGgSzwAA0CSeAQCgyRcGL3C+GAgA0GflGQAAmsQzAAA0iWcAAGgSzwAA0CSeAQCgSTwDAECTeAYAgCbxDAAATeIZAACaXGGQdet0Vz88tHfnGs8EAGCBlWcAAGgSzwAA0CSeAQCgSTwDAECTeAYAgCbxDAAATU5Vx6pwmjkA4Hxk5RkAAJrEMwAANIlnAABoEs8AANAkngEAoEk8AwBAk3gGAIAm53lmTTn/MwBwLhPPrAuni2oAgPXEYRsAANBk5Zlls2oMAFworDwDAECTeAYAgCbxDAAATeIZAACaxDMAADSJZwAAaBLPAADQJJ4BAKBJPAMAQJN4BgCAJvEMAABN4hkAAJo2LufFVXUoyS+SHE/y7BhjR1W9OMlnkmxNcijJvxpj/HR50wQAgPlbiZXn3xtjbB9j7Jge70nywBhjW5IHpscAAHDOW43DNnYluWu6f1eSG1bhdwAAwJpbbjyPJH9ZVQ9V1e5p7PIxxpEkmW5fPuuFVbW7qg5U1YHjTx9b5jQAAGD1LeuY5yTXjDGerKqXJ7m/qv6m+8Ixxr4k+5Lk4k3bxjLnAQAAq25ZK89jjCen26NJvpDkqiRPVdWmJJlujy53kgAAsB6cdTxX1W9W1QtP3E/yB0keTXJvkpunzW5Ocs9yJwkAAOvBcg7buDzJF6rqxPv8+RjjL6rqm0nurqpbkvwwyY3LnyYAAMzfWcfzGOP7SX5nxvj/SfL65UwKAADWI1cYBACAJvEMAABN4hkAAJrEMwAANIlnAABoEs8AANAkngEAoEk8AwBAk3gGAIAm8QwAAE3iGQAAmsQzAAA0iWcAAGgSzwAA0CSeAQCgSTwDAECTeAYAgCbxDAAATeIZAACaNs57AnCmtu7Zf8rYob075zATAOBCY+UZAACaxDMAADSJZwAAaBLPAADQJJ4BAKBJPAMAQJN4BgCAJvEMAABN4hkAAJrEMwAANIlnAABoEs8AANC0cd4TgJWwdc/+meOH9u5c45kAAOczK88AANAkngEAoEk8AwBAk3gGAIAm8QwAAE3iGQAAmsQzAAA0iWcAAGgSzwAA0OQKg5zXZl158HRXHXSVQgBgKVaeAQCgSTwDAECTwza44Jzu8AwAgKVYeQYAgCbxDAAATeIZAACaxDMAADSJZwAAaBLPAADQJJ4BAKBJPAMAQJN4BgCAJvEMAABN4hkAAJrEMwAANIlnAABoEs8AANAkngEAoGnjvCcA693WPfvb2x7au3MVZwIAzJuVZwAAaLLyDCto1iq11WgAOH9YeQYAgCbxDAAATeIZAACaxDMAADT5wiCsstOd6s4XCQHg3GPlGQAAmsQzAAA0OWwD5uRMDudwlUMAWB+sPAMAQNOqxXNVXVdV362qg1W1Z7V+DwAArJVVOWyjqjYk+U9J/kWSw0m+WVX3jjG+sxq/D84nZ3KIxnrgbCIAXEhWa+X5qiQHxxjfH2P83ySfTrJrlX4XAACsiRpjrPybVr05yXVjjH8zPX5rkt8dY7xz0Ta7k+yeHv52kkdXfCKc616a5MfzngTrjv2CWewXzGK/YJZ/NMZ44dm+eLXOtlEzxv5OpY8x9iXZlyRVdWCMsWOV5sI5yn7BLPYLZrFfMIv9glmq6sByXr9ah20cTnLFosdbkjy5Sr8LAADWxGrF8zeTbKuqK6vqeUluSnLvKv0uAABYE6ty2MYY49mqemeS/55kQ5I7xxiPPcdL9q3GPDjn2S+YxX7BLPYLZrFfMMuy9otV+cIgAACcj1xhEAAAmsQzAAA0zT2eXcabE6rqUFV9u6oePnEamap6cVXdX1Xfm25fNO95srqq6s6qOlpVjy4am7kf1IKPTp8fj1TVa+c3c1bTafaLD1bVj6bPjIer6vpFz71v2i++W1VvmM+sWU1VdUVVfbmqHq+qx6rqXdO4z4sL2HPsFyv2eTHXeF50Ge83JnlVkrdU1avmOSfm7vfGGNsXnZdzT5IHxhjbkjwwPeb89vEk1500drr94I1Jtk0/u5PcvkZzZO19PKfuF0ly2/SZsX2McV+STP8duSnJq6fX/Nn03xvOL88mec8Y45VJrk5y6/S/vc+LC9vp9otkhT4v5r3y7DLeLGVXkrum+3cluWGOc2ENjDG+muQnJw2fbj/YleQTY8HXk1xWVZvWZqaspdPsF6ezK8mnxxjPjDF+kORgFv57w3lkjHFkjPGt6f4vkjyeZHN8XlzQnmO/OJ0z/ryYdzxvTvLEoseH89z/QM5vI8lfVtVD0+Xbk+TyMcaRZOH/EElePrfZMU+n2w98hvDO6U/wdy46rMt+cYGpqq1JXpPkwfi8YHLSfpGs0OfFvON5yct4c0G5Zozx2iz8ae3Wqvrn854Q657PkAvb7UlekWR7kiNJPjyN2y8uIFX1giSfS/LuMcbPn2vTGWP2i/PUjP1ixT4v5h3PLuPN/zfGeHK6PZrkC1n4s8lTJ/6sNt0end8MmaPT7Qc+Qy5gY4ynxhjHxxi/SvKx/PpPrfaLC0RVXZSFQPrkGOPz07DPiwvcrP1iJT8v5h3PLuNNkqSqfrOqXnjifpI/SPJoFvaHm6fNbk5yz3xmyJydbj+4N8nbpm/RX53k2Ik/13L+O+l41Tdl4TMjWdgvbqqqi6vqyix8Qewbaz0/VldVVZI7kjw+xvjIoqd8XlzATrdfrOTnxapcnrvrLC7jzfnr8iRfWNjnszHJn48x/qKqvpnk7qq6JckPk9w4xzmyBqrqU0muTfLSqjqc5ANJ9mb2fnBfkuuz8AWPp5O8fc0nzJo4zX5xbVVtz8KfWA8leUeSjDEeq6q7k3wnC9+8v3WMcXwe82ZVXZPkrUm+XVUPT2Pvj8+LC93p9ou3rNTnhctzAwBA07wP2wAAgHOGeAYAgCbxDAAATeIZAACaxDMAADSJZwAAaBLPAADQ9P8A3HfGFiVlwwMAAAAASUVORK5CYII=\n",
      "text/plain": [
       "<Figure size 864x864 with 1 Axes>"
      ]
     },
     "metadata": {
      "needs_background": "light"
     },
     "output_type": "display_data"
    },
    {
     "data": {
      "image/png": "iVBORw0KGgoAAAANSUhEUgAAAs8AAAKvCAYAAACVhiLtAAAABHNCSVQICAgIfAhkiAAAAAlwSFlzAAALEgAACxIB0t1+/AAAADh0RVh0U29mdHdhcmUAbWF0cGxvdGxpYiB2ZXJzaW9uMy4xLjMsIGh0dHA6Ly9tYXRwbG90bGliLm9yZy+AADFEAAAeM0lEQVR4nO3dbaxl51nf4f9dj3EIpDZ5lWtbmgimLYEKJ3WNpUhVSCg4HlQHiSBHVeJGroZKjhRE1DLhCyA10iAVDEgl0oDTOBWQWEAUC7uU1EmE+JCXcTBJHBNlmkyTwVYsmsQEWaTycPfDWdMc7D0+t+e87Hm5Luno7P3stfZ5jry856fnrL12dXcAAICt/YN1TwAAAM4X4hkAAIbEMwAADIlnAAAYEs8AADAkngEAYGgcz1V1SVX9WVX94XL/pVX1sar6fFW9r6q+bRm/bLl/fHl8/+5MHQAA9tazWXl+a5KHN93/pSR3dPeBJF9LctsyfluSr3X39yS5Y9kOAADOe6N4rqqrkxxM8lvL/Ury6iS/t2xyV5LXLbdvXu5nefw1y/YAAHBe2zfc7leT/Mckz1vuvyDJ17v7yeX+ySRXLbevSvLlJOnuJ6vq8WX7v9r8hFV1KMmhJKlLn/PPL33B1U/7of/sqsvHvwgAAGzlgQce+KvuftHZ7r9lPFfVjyV5rLsfqKpXnR5esWkPHvvWQPfRJEeT5LIrD/SVt/7q03Y6duTgVtMDAICxqvrf29l/svL8yiT/uqpuSvKcJP8wGyvRV1TVvmX1+eokjyzbn0xyTZKTVbUvyeVJvrqdSQIAwLlgy3Oeu/vt3X11d+9PckuSD3X3v0ny4SQ/sWx2a5IPLLfvWe5nefxD3f20lWcAADjfbOc6zz+b5Geq6ng2zmm+cxm/M8kLlvGfSXJ4e1MEAIBzw/QNg0mS7v5Iko8st7+Q5PoV2/xtktfvwNwAAOCc4hMGAQBgSDwDAMCQeAYAgCHxDAAAQ+IZAACGxDMAAAyJZwAAGBLPAAAwJJ4BAGBIPAMAwJB4BgCAIfEMAABD4hkAAIbEMwAADIlnAAAYEs8AADAkngEAYEg8AwDAkHgGAIAh8QwAAEPiGQAAhsQzAAAMiWcAABgSzwAAMCSeAQBgSDwDAMCQeAYAgCHxDAAAQ+IZAACGxDMAAAyJZwAAGBLPAAAwJJ4BAGBIPAMAwJB4BgCAIfEMAABD4hkAAIbEMwAADIlnAAAYEs8AADAkngEAYEg8AwDAkHgGAIAh8QwAAEPiGQAAhsQzAAAMiWcAABgSzwAAMCSeAQBgSDwDAMCQeAYAgCHxDAAAQ+IZAACGxDMAAAyJZwAAGBLPAAAwJJ4BAGBIPAMAwJB4BgCAIfEMAABD4hkAAIbEMwAADIlnAAAYEs8AADAkngEAYEg8AwDAkHgGAIAh8QwAAEPiGQAAhsQzAAAMiWcAABgSzwAAMCSeAQBgaMt4rqrnVNXHq+rPq+qhqvrFZfzdVfXFqnpw+bp2Ga+q+vWqOl5Vn6qqV+z2LwEAAHth32CbbyZ5dXf/TVVdmuRPq+q/L4/9h+7+vads/9okB5avH0zyzuU7AACc17Zcee4Nf7PcvXT56mfY5eYk71n2+2iSK6rqyu1PFQAA1mt0znNVXVJVDyZ5LMkHu/tjy0PvWE7NuKOqLlvGrkry5U27n1zGnvqch6rqWFUdO/XE49v4FQAAYG+M4rm7T3X3tUmuTnJ9VX1/krcn+adJ/kWS5yf52WXzWvUUK57zaHdf193XXfLcy89q8gAAsJee1dU2uvvrST6S5MbufnQ5NeObSf5rkuuXzU4muWbTblcneWQH5goAAGs1udrGi6rqiuX2tyf54SR/cfo85qqqJK9L8plll3uSvGm56sYNSR7v7kd3ZfYAALCHJlfbuDLJXVV1STZi++7u/sOq+lBVvSgbp2k8mOTfL9vfl+SmJMeTPJHkzTs/bQAA2HtbxnN3fyrJy1eMv/oM23eS27c/NQAAOLf4hEEAABgSzwAAMCSeAQBgSDwDAMCQeAYAgCHxDAAAQ+IZAACGxDMAAAyJZwAAGBLPAAAwJJ4BAGBIPAMAwJB4BgCAIfEMAABD4hkAAIbEMwAADIlnAAAYEs8AADAkngEAYEg8AwDAkHgGAIAh8QwAAEPiGQAAhsQzAAAMiWcAABgSzwAAMCSeAQBgSDwDAMCQeAYAgCHxDAAAQ+IZAACGxDMAAAyJZwAAGBLPAAAwJJ4BAGBIPAMAwJB4BgCAIfEMAABD4hkAAIbEMwAADIlnAAAYEs8AADAkngEAYEg8AwDAkHgGAIAh8QwAAEPiGQAAhsQzAAAMiWcAABgSzwAAMCSeAQBgSDwDAMCQeAYAgCHxDAAAQ+IZAACGxDMAAAyJZwAAGBLPAAAwJJ4BAGBIPAMAwJB4BgCAIfEMAABD4hkAAIb2rXsCz2T/4XufNnbiyME1zAQAAKw8AwDAmHgGAIAh8QwAAEPiGQAAhsQzAAAMiWcAABgSzwAAMCSeAQBgaMt4rqrnVNXHq+rPq+qhqvrFZfylVfWxqvp8Vb2vqr5tGb9suX98eXz/7v4KAACwNyYrz99M8uru/oEk1ya5sapuSPJLSe7o7gNJvpbktmX725J8rbu/J8kdy3YAAHDe2zKee8PfLHcvXb46yauT/N4yfleS1y23b17uZ3n8NVVVOzZjAABYk9E5z1V1SVU9mOSxJB9M8r+SfL27n1w2OZnkquX2VUm+nCTL448necFOThoAANZhFM/dfaq7r01ydZLrk3zvqs2W76tWmfupA1V1qKqOVdWxU088Pp0vAACszbO62kZ3fz3JR5LckOSKqtq3PHR1kkeW2yeTXJMky+OXJ/nqiuc62t3Xdfd1lzz38rObPQAA7KHJ1TZeVFVXLLe/PckPJ3k4yYeT/MSy2a1JPrDcvme5n+XxD3X301aeAQDgfLNv601yZZK7quqSbMT23d39h1X12STvrar/lOTPkty5bH9nkv9WVcezseJ8yy7MGwAA9tyW8dzdn0ry8hXjX8jG+c9PHf/bJK/fkdkBAMA5xCcMAgDAkHgGAIAh8QwAAEPiGQAAhsQzAAAMiWcAABgSzwAAMCSeAQBgSDwDAMCQeAYAgCHxDAAAQ+IZAACGxDMAAAyJZwAAGBLPAAAwJJ4BAGBIPAMAwJB4BgCAIfEMAABD4hkAAIbEMwAADIlnAAAYEs8AADAkngEAYEg8AwDAkHgGAIAh8QwAAEPiGQAAhsQzAAAMiWcAABgSzwAAMCSeAQBgSDwDAMCQeAYAgCHxDAAAQ+IZAACGxDMAAAyJZwAAGBLPAAAwJJ4BAGBIPAMAwJB4BgCAIfEMAABD4hkAAIbEMwAADIlnAAAYEs8AADAkngEAYEg8AwDAkHgGAIAh8QwAAEPiGQAAhsQzAAAMiWcAABgSzwAAMCSeAQBgSDwDAMCQeAYAgCHxDAAAQ+IZAACGxDMAAAyJZwAAGBLPAAAwtG/dE3i29h++d+X4iSMH93gmAABcbKw8AwDAkHgGAIAh8QwAAEPiGQAAhsQzAAAMiWcAABgSzwAAMCSeAQBgSDwDAMDQlvFcVddU1Yer6uGqeqiq3rqM/0JV/WVVPbh83bRpn7dX1fGq+lxV/ehu/gIAALBXJh/P/WSSt3X3J6vqeUkeqKoPLo/d0d3/efPGVfWyJLck+b4k/yjJ/6yqf9zdp3Zy4gAAsNe2XHnu7ke7+5PL7W8keTjJVc+wy81J3tvd3+zuLyY5nuT6nZgsAACs07M657mq9id5eZKPLUNvqapPVdW7quq7lrGrknx5024nsyK2q+pQVR2rqmOnnnj8WU8cAAD22jieq+o7k/x+kp/u7r9O8s4k353k2iSPJvnl05uu2L2fNtB9tLuv6+7rLnnu5c964gAAsNdG8VxVl2YjnH+7u/8gSbr7K919qrv/Lslv5lunZpxMcs2m3a9O8sjOTRkAANZjcrWNSnJnkoe7+1c2jV+5abMfT/KZ5fY9SW6pqsuq6qVJDiT5+M5NGQAA1mNytY1XJnljkk9X1YPL2M8leUNVXZuNUzJOJPmpJOnuh6rq7iSfzcaVOm53pQ0AAC4EW8Zzd/9pVp/HfN8z7POOJO/YxrwAAOCc4xMGAQBgSDwDAMCQeAYAgCHxDAAAQ+IZAACGxDMAAAyJZwAAGBLPAAAwJJ4BAGBIPAMAwJB4BgCAIfEMAABD4hkAAIbEMwAADIlnAAAYEs8AADAkngEAYEg8AwDAkHgGAIAh8QwAAEPiGQAAhsQzAAAMiWcAABgSzwAAMCSeAQBgSDwDAMCQeAYAgCHxDAAAQ+IZAACGxDMAAAyJZwAAGBLPAAAwJJ4BAGBIPAMAwJB4BgCAIfEMAABD4hkAAIbEMwAADIlnAAAYEs8AADAkngEAYEg8AwDAkHgGAIAh8QwAAEPiGQAAhsQzAAAMiWcAABgSzwAAMCSeAQBgSDwDAMCQeAYAgCHxDAAAQ+IZAACGxDMAAAyJZwAAGBLPAAAwJJ4BAGBIPAMAwJB4BgCAIfEMAABD4hkAAIbEMwAADIlnAAAYEs8AADAkngEAYEg8AwDAkHgGAIAh8QwAAEPiGQAAhsQzAAAMiWcAABjat+4J8PftP3zvyvETRw7u8UwAAHiqLVeeq+qaqvpwVT1cVQ9V1VuX8edX1Qer6vPL9+9axquqfr2qjlfVp6rqFbv9SwAAwF6YnLbxZJK3dff3Jrkhye1V9bIkh5Pc390Hkty/3E+S1yY5sHwdSvLOHZ81AACswZbx3N2Pdvcnl9vfSPJwkquS3JzkrmWzu5K8brl9c5L39IaPJrmiqq7c8ZkDAMAee1ZvGKyq/UlenuRjSV7S3Y8mG4Gd5MXLZlcl+fKm3U4uYwAAcF4bx3NVfWeS30/y093918+06YqxXvF8h6rqWFUdO/XE49NpAADA2oziuaouzUY4/3Z3/8Ey/JXTp2Ms3x9bxk8muWbT7lcneeSpz9ndR7v7uu6+7pLnXn628wcAgD0zudpGJbkzycPd/SubHronya3L7VuTfGDT+JuWq27ckOTx06d3AADA+WxynedXJnljkk9X1YPL2M8lOZLk7qq6LcmXkrx+eey+JDclOZ7kiSRv3tEZAwDAmmwZz939p1l9HnOSvGbF9p3k9m3OCwAAzjk+nhsAAIbEMwAADIlnAAAYEs8AADA0udrGeWH/4XtXjp84cnCPZwIAwIXKyjMAAAyJZwAAGBLPAAAwJJ4BAGBIPAMAwJB4BgCAIfEMAABD4hkAAIbEMwAADIlnAAAYEs8AADAkngEAYEg8AwDAkHgGAIAh8QwAAEPiGQAAhsQzAAAMiWcAABgSzwAAMLRv3RPYbfsP3/u0sRNHDq5hJgAAnO+sPAMAwJB4BgCAIfEMAABD4hkAAIbEMwAADIlnAAAYuuAvVXcuWHW5vMQl8wAAzjdWngEAYEg8AwDAkHgGAIAh8QwAAEPiGQAAhsQzAAAMiWcAABhynec1OtP1nwEAODdZeQYAgCHxDAAAQ+IZAACGxDMAAAyJZwAAGLoor7ZxpqtcnDhycI9nAgDA+cTKMwAADIlnAAAYEs8AADAkngEAYEg8AwDAkHgGAIChi/JSdWey6hJ2Ll8HAMBpVp4BAGBIPAMAwJB4BgCAIfEMAABD4hkAAIbEMwAADIlnAAAYcp3nLay69nPi+s8AABcjK88AADBk5XkHnWmVGgCAC4OVZwAAGBLPAAAwJJ4BAGBIPAMAwJB4BgCAIfEMAABD4hkAAIbEMwAADIlnAAAYEs8AADC0ZTxX1buq6rGq+symsV+oqr+sqgeXr5s2Pfb2qjpeVZ+rqh/drYkDAMBem6w8vzvJjSvG7+jua5ev+5Kkql6W5JYk37fs8xtVdclOTRYAANZpy3ju7j9J8tXh892c5L3d/c3u/mKS40mu38b8AADgnLFvG/u+parelORYkrd199eSXJXko5u2ObmMPU1VHUpyKEku+Ycv2sY01mP/4XvXPQUAAPbY2b5h8J1JvjvJtUkeTfLLy3it2LZXPUF3H+3u67r7ukuee/lZTgMAAPbOWcVzd3+lu091998l+c1869SMk0mu2bTp1Uke2d4UAQDg3HBW8VxVV266++NJTl+J454kt1TVZVX10iQHknx8e1MEAIBzw5bnPFfV7yZ5VZIXVtXJJD+f5FVVdW02Tsk4keSnkqS7H6qqu5N8NsmTSW7v7lO7M3UAANhbW8Zzd79hxfCdz7D9O5K8YzuTAgCAc5FPGAQAgCHxDAAAQ+IZAACGxDMAAAyJZwAAGBLPAAAwJJ4BAGBIPAMAwJB4BgCAIfEMAABD4hkAAIbEMwAADIlnAAAYEs8AADAkngEAYEg8AwDAkHgGAIAh8QwAAEPiGQAAhsQzAAAMiWcAABgSzwAAMCSeAQBgSDwDAMCQeAYAgCHxDAAAQ+IZAACGxDMAAAztW/cEmNl/+N6njZ04cnANMwEAuHhZeQYAgCHxDAAAQ+IZAACGxDMAAAyJZwAAGBLPAAAwJJ4BAGBIPAMAwJB4BgCAIfEMAABD4hkAAIbEMwAADIlnAAAYEs8AADAkngEAYEg8AwDAkHgGAIAh8QwAAEPiGQAAhsQzAAAMiWcAABgSzwAAMCSeAQBgSDwDAMCQeAYAgCHxDAAAQ+IZAACGxDMAAAyJZwAAGBLPAAAwJJ4BAGBIPAMAwJB4BgCAIfEMAABD4hkAAIb2rXsC7Lz9h+992tiJIwfXMBMAgAuLlWcAABgSzwAAMCSeAQBgSDwDAMCQeAYAgCHxDAAAQ+IZAACGtrzOc1W9K8mPJXmsu79/GXt+kvcl2Z/kRJKf7O6vVVUl+bUkNyV5Ism/7e5P7s7UWXU9ZwAAds9k5fndSW58ytjhJPd394Ek9y/3k+S1SQ4sX4eSvHNnpgkAAOu35cpzd/9JVe1/yvDNSV613L4ryUeS/Owy/p7u7iQfraorqurK7n50pybM2TnTKrVPHgQAmDvbc55fcjqIl+8vXsavSvLlTdudXMYAAOC8t9NvGKwVY71yw6pDVXWsqo6deuLxHZ4GAADsvC1P2ziDr5w+HaOqrkzy2DJ+Msk1m7a7Oskjq56gu48mOZokl115YGVgs/uczgEAMHe2K8/3JLl1uX1rkg9sGn9TbbghyePOdwYA4EIxuVTd72bjzYEvrKqTSX4+yZEkd1fVbUm+lOT1y+b3ZeMydcezcam6N+/CnAEAYC0mV9t4wxkees2KbTvJ7dudFAAAnIt8wiAAAAyJZwAAGBLPAAAwJJ4BAGBIPAMAwJB4BgCAIfEMAABD4hkAAIbEMwAADIlnAAAYEs8AADAkngEAYEg8AwDAkHgGAIAh8QwAAEPiGQAAhsQzAAAMiWcAABgSzwAAMCSeAQBgSDwDAMCQeAYAgKF9654A56b9h+992tiJIwfXMBMAgHOHlWcAABiy8szYqtXoxIo0AHDxsPIMAABD4hkAAIbEMwAADIlnAAAY8oZBts1l7QCAi4WVZwAAGBLPAAAwJJ4BAGBIPAMAwJB4BgCAIfEMAABD4hkAAIbEMwAADIlnAAAYEs8AADAkngEAYEg8AwDA0L51TwDOZP/he1eOnzhycI9nAgCwwcozAAAMiWcAABgSzwAAMCSeAQBgSDwDAMCQeAYAgCHxDAAAQ+IZAACGxDMAAAyJZwAAGBLPAAAwJJ4BAGBo37onwMVl/+F7V46fOHJwj2cCAPDsWXkGAIAh8QwAAEPiGQAAhsQzAAAMiWcAABgSzwAAMCSeAQBgSDwDAMCQeAYAgCGfMMiuONMnCQIAnM+sPAMAwJB4BgCAIfEMAABD4hkAAIbEMwAADIlnAAAYEs8AADC0res8V9WJJN9IcirJk919XVU9P8n7kuxPciLJT3b317Y3TfiWVdeQPnHk4BpmAgBcbHZi5fmHuvva7r5uuX84yf3dfSDJ/ct9AAA47+3GaRs3J7lruX1Xktftws8AAIA9t9147iR/XFUPVNWhZewl3f1okizfX7xqx6o6VFXHqurYqSce3+Y0AABg923rnOckr+zuR6rqxUk+WFV/Md2xu48mOZokl115oLc5DwAA2HXbWnnu7keW748leX+S65N8paquTJLl+2PbnSQAAJwLzjqeq+o7qup5p28n+ZEkn0lyT5Jbl81uTfKB7U4SAADOBds5beMlSd5fVaef53e6+4+q6hNJ7q6q25J8Kcnrtz9NLnSrLj+3W8/rsnYAwNk663ju7i8k+YEV4/8nyWu2MykAADgX+YRBAAAYEs8AADAkngEAYEg8AwDAkHgGAIAh8QwAAEPiGQAAhsQzAAAMiWcAABgSzwAAMCSeAQBgSDwDAMCQeAYAgCHxDAAAQ+IZAACGxDMAAAyJZwAAGBLPAAAwJJ4BAGBIPAMAwNC+dU8AznX7D9/7tLETRw6uYSYAwLpZeQYAgCErz1wQVq0OP9ttrSYDAFux8gwAAEPiGQAAhsQzAAAMiWcAABgSzwAAMCSeAQBgSDwDAMCQeAYAgCHxDAAAQ+IZAACGxDMAAAyJZwAAGBLPAAAwJJ4BAGBIPAMAwJB4BgCAIfEMAABD4hkAAIbEMwAADIlnAAAYEs8AADAkngEAYGjfuicA54r9h+9d9xQAgHOceIazcKbQPnHk4B7PBADYS07bAACAISvPcB6w0g0A5wYrzwAAMCSeAQBgyGkbsMuccgEAFw4rzwAAMGTlGXaQa0UDwIXNyjMAAAyJZwAAGHLaBqyJNxICwPnHyjMAAAyJZwAAGBLPAAAwJJ4BAGBIPAMAwJB4BgCAIfEMAABDrvMM57FV14p2nWgA2D1WngEAYMjKM5xjzvTJgwDA+ll5BgCAISvPcIE508q1c6EBYPvEM1wkvLkQALbPaRsAADAkngEAYEg8AwDA0K6d81xVNyb5tSSXJPmt7j6yWz8LODu7+eZC51gDcCHalXiuqkuS/Jck/yrJySSfqKp7uvuzu/HzgJ3lih0AsNpunbZxfZLj3f2F7v6/Sd6b5OZd+lkAALAnqrt3/kmrfiLJjd3975b7b0zyg939lk3bHEpyaLn7/Uk+s+MT4Xz3wiR/te5JcM5xXLCK44JVHBes8k+6+3lnu/NunfNcK8b+XqV399EkR5Okqo5193W7NBfOU44LVnFcsIrjglUcF6xSVce2s/9unbZxMsk1m+5fneSRXfpZAACwJ3Yrnj+R5EBVvbSqvi3JLUnu2aWfBQAAe2JXTtvo7ier6i1J/kc2LlX3ru5+6Bl2Obob8+C857hgFccFqzguWMVxwSrbOi525Q2DAABwIfIJgwAAMCSeAQBgaO3xXFU3VtXnqup4VR1e93xYn6o6UVWfrqoHT19GpqqeX1UfrKrPL9+/a93zZHdV1buq6rGq+symsZXHQW349eX141NV9Yr1zZzddIbj4heq6i+X14wHq+qmTY+9fTkuPldVP7qeWbObquqaqvpwVT1cVQ9V1VuXca8XF7FnOC527PVirfG86WO8X5vkZUneUFUvW+ecWLsf6u5rN12X83CS+7v7QJL7l/tc2N6d5ManjJ3pOHhtkgPL16Ek79yjObL33p2nHxdJcsfymnFtd9+XJMu/I7ck+b5ln99Y/r3hwvJkkrd19/cmuSHJ7ct/e68XF7czHRfJDr1erHvl2cd4s5Wbk9y13L4ryevWOBf2QHf/SZKvPmX4TMfBzUne0xs+muSKqrpyb2bKXjrDcXEmNyd5b3d/s7u/mOR4Nv694QLS3Y929yeX299I8nCSq+L14qL2DMfFmTzr14t1x/NVSb686f7JPPMvyIWtk/xxVT2wfHx7krykux9NNv6HSPLitc2OdTrTceA1hLcsf4J/16bTuhwXF5mq2p/k5Uk+Fq8XLJ5yXCQ79Hqx7nje8mO8uai8srtfkY0/rd1eVf9y3RPinOc15OL2ziTfneTaJI8m+eVl3HFxEamq70zy+0l+urv/+pk2XTHmuLhArTguduz1Yt3x7GO8+f+6+5Hl+2NJ3p+NP5t85fSf1Zbvj61vhqzRmY4DryEXse7+Snef6u6/S/Kb+dafWh0XF4mqujQbgfTb3f0Hy7DXi4vcquNiJ18v1h3PPsabJElVfUdVPe/07SQ/kuQz2Tgebl02uzXJB9YzQ9bsTMfBPUnetLyL/oYkj5/+cy0Xvqecr/rj2XjNSDaOi1uq6rKqemk23iD28b2eH7urqirJnUke7u5f2fSQ14uL2JmOi518vdiVj+eeOouP8ebC9ZIk79845rMvye909x9V1SeS3F1VtyX5UpLXr3GO7IGq+t0kr0rywqo6meTnkxzJ6uPgviQ3ZeMNHk8kefOeT5g9cYbj4lVVdW02/sR6IslPJUl3P1RVdyf5bDbeeX97d59ax7zZVa9M8sYkn66qB5exn4vXi4vdmY6LN+zU64WP5wYAgKF1n7YBAADnDfEMAABD4hkAAIbEMwAADIlnAAAYEs8AADAkngEAYOj/AdBO6+LBdWRvAAAAAElFTkSuQmCC\n",
      "text/plain": [
       "<Figure size 864x864 with 1 Axes>"
      ]
     },
     "metadata": {
      "needs_background": "light"
     },
     "output_type": "display_data"
    },
    {
     "data": {
      "image/png": "iVBORw0KGgoAAAANSUhEUgAAAs8AAAKvCAYAAACVhiLtAAAABHNCSVQICAgIfAhkiAAAAAlwSFlzAAALEgAACxIB0t1+/AAAADh0RVh0U29mdHdhcmUAbWF0cGxvdGxpYiB2ZXJzaW9uMy4xLjMsIGh0dHA6Ly9tYXRwbG90bGliLm9yZy+AADFEAAAeI0lEQVR4nO3dbaxl51nf4f9dj3EIpHbeNbUtTQTTlkCFk06NpUhVSCg4dlUHiVSOqsSKXA2VHCkI1DLhCyA10iAVTCOVSAancSpKsIAoFk4pqZMI8SEvYzCOHRNlmkzjwVYsmsQEWaTycPfDWdOc2nt8bs952fNyXdLR3vvZa5/zHHl5z0/PWXut6u4AAABb+zvrngAAAJwvxDMAAAyJZwAAGBLPAAAwJJ4BAGBIPAMAwNA4nqvqkqr606r6/eXxq6rq01X1xar67ar6jmX8suXx8eX5A7szdQAA2FvPZ+X5XUke2fT4l5Lc3t0Hk3w9ya3L+K1Jvt7d35vk9mU7AAA4743iuaquSnJjkt9YHleSNyT5nWWTu5K8ebl/0/I4y/NvXLYHAIDz2r7hdr+a5N8ledHy+KVJvtHdTy+PTya5crl/ZZJHk6S7n66qJ5ft/3LzN6yqw0kOJ0ld+oJ/fOlLr3rWD/1HV14+/kUAAGAr999//19298vP9vVbxnNV/fMkT3T3/VX1+tPDKzbtwXPfHui+I8kdSXLZ/oO9/5ZffdaLjh29cavpAQDAWFX9r+28frLy/Lok/6KqbkjygiR/Nxsr0VdU1b5l9fmqJI8t259McnWSk1W1L8nlSb62nUkCAMC5YMtjnrv73d19VXcfSHJzko93979K8okkP7FsdkuSjyz371keZ3n+4939rJVnAAA432znPM8/m+Snq+p4No5pvnMZvzPJS5fxn05yZHtTBACAc8P0A4NJku7+ZJJPLve/lOTaFdv8TZK37MDcAADgnOIKgwAAMCSeAQBgSDwDAMCQeAYAgCHxDAAAQ+IZAACGxDMAAAyJZwAAGBLPAAAwJJ4BAGBIPAMAwJB4BgCAIfEMAABD4hkAAIbEMwAADIlnAAAYEs8AADAkngEAYEg8AwDAkHgGAIAh8QwAAEPiGQAAhsQzAAAMiWcAABgSzwAAMCSeAQBgSDwDAMCQeAYAgCHxDAAAQ+IZAACGxDMAAAyJZwAAGBLPAAAwJJ4BAGBIPAMAwJB4BgCAIfEMAABD4hkAAIbEMwAADIlnAAAYEs8AADAkngEAYEg8AwDAkHgGAIAh8QwAAEPiGQAAhsQzAAAMiWcAABgSzwAAMCSeAQBgSDwDAMCQeAYAgCHxDAAAQ+IZAACGxDMAAAyJZwAAGBLPAAAwJJ4BAGBIPAMAwJB4BgCAIfEMAABD4hkAAIbEMwAADIlnAAAYEs8AADAkngEAYEg8AwDAkHgGAIAh8QwAAEPiGQAAhsQzAAAMiWcAABgSzwAAMLRlPFfVC6rqM1X1Z1X1cFX94jL+gar6clU9sHxds4xXVb23qo5X1YNV9drd/iUAAGAv7Bts860kb+juv66qS5P8cVX9t+W5f9vdv/OM7d+U5ODy9UNJ3rfcAgDAeW3Llefe8NfLw0uXr36Ol9yU5IPL6z6V5Iqq2r/9qQIAwHqNjnmuqkuq6oEkTyT5WHd/ennqPcuhGbdX1WXL2JVJHt308pPL2DO/5+GqOlZVx0499eQ2fgUAANgbo3ju7lPdfU2Sq5JcW1U/kOTdSf5hkn+S5CVJfnbZvFZ9ixXf847uPtTdhy554eVnNXkAANhLz+tsG939jSSfTHJ9dz++HJrxrST/Ocm1y2Ynk1y96WVXJXlsB+YKAABrNTnbxsur6orl/ncm+ZEkf376OOaqqiRvTvLQ8pJ7krx9OevGdUme7O7Hd2X2AACwhyZn29if5K6quiQbsX13d/9+VX28ql6ejcM0Hkjyb5btP5rkhiTHkzyV5B07P20AANh7W8Zzdz+Y5DUrxt9whu07yW3bnxoAAJxbXGEQAACGxDMAAAyJZwAAGBLPAAAwJJ4BAGBIPAMAwJB4BgCAIfEMAABD4hkAAIbEMwAADIlnAAAYEs8AADAkngEAYEg8AwDAkHgGAIAh8QwAAEPiGQAAhsQzAAAMiWcAABgSzwAAMCSeAQBgSDwDAMCQeAYAgCHxDAAAQ+IZAACGxDMAAAyJZwAAGBLPAAAwJJ4BAGBIPAMAwJB4BgCAIfEMAABD4hkAAIbEMwAADIlnAAAYEs8AADAkngEAYEg8AwDAkHgGAIAh8QwAAEPiGQAAhsQzAAAMiWcAABgSzwAAMCSeAQBgSDwDAMCQeAYAgCHxDAAAQ+IZAACGxDMAAAyJZwAAGBLPAAAwJJ4BAGBIPAMAwJB4BgCAIfEMAABD4hkAAIbEMwAADIlnAAAYEs8AADAkngEAYEg8AwDAkHgGAIAh8QwAAEPiGQAAhsQzAAAM7Vv3BJ7LgSP3PmvsxNEb1zATAACw8gwAAGPiGQAAhsQzAAAMiWcAABgSzwAAMLRlPFfVC6rqM1X1Z1X1cFX94jL+qqr6dFV9sap+u6q+Yxm/bHl8fHn+wO7+CgAAsDcmK8/fSvKG7v7BJNckub6qrkvyS0lu7+6DSb6e5NZl+1uTfL27vzfJ7ct2AABw3tsynnvDXy8PL12+OskbkvzOMn5Xkjcv929aHmd5/o1VVTs2YwAAWJPRMc9VdUlVPZDkiSQfS/I/k3yju59eNjmZ5Mrl/pVJHk2S5fknk7x0JycNAADrMIrn7j7V3dckuSrJtUm+b9Vmy+2qVeZ+5kBVHa6qY1V17NRTT07nCwAAa/O8zrbR3d9I8skk1yW5oqpOX977qiSPLfdPJrk6SZbnL0/ytRXf647uPtTdhy554eVnN3sAANhDk7NtvLyqrljuf2eSH0nySJJPJPmJZbNbknxkuX/P8jjL8x/v7metPAMAwPlm39abZH+Su6rqkmzE9t3d/ftV9fkkH6qqf5/kT5PcuWx/Z5L/UlXHs7HifPMuzBsAAPbclvHc3Q8mec2K8S9l4/jnZ47/TZK37MjsAADgHOIKgwAAMCSeAQBgSDwDAMCQeAYAgCHxDAAAQ+IZAACGxDMAAAyJZwAAGBLPAAAwJJ4BAGBIPAMAwJB4BgCAIfEMAABD4hkAAIbEMwAADIlnAAAYEs8AADAkngEAYEg8AwDAkHgGAIAh8QwAAEPiGQAAhsQzAAAMiWcAABgSzwAAMCSeAQBgSDwDAMCQeAYAgCHxDAAAQ+IZAACGxDMAAAyJZwAAGBLPAAAwJJ4BAGBIPAMAwJB4BgCAIfEMAABD4hkAAIbEMwAADIlnAAAYEs8AADAkngEAYEg8AwDAkHgGAIAh8QwAAEPiGQAAhsQzAAAMiWcAABgSzwAAMCSeAQBgSDwDAMCQeAYAgCHxDAAAQ+IZAACGxDMAAAyJZwAAGBLPAAAwJJ4BAGBIPAMAwJB4BgCAIfEMAABD4hkAAIbEMwAADIlnAAAYEs8AADAkngEAYEg8AwDAkHgGAIAh8QwAAEPiGQAAhsQzAAAMiWcAABgSzwAAMLRlPFfV1VX1iap6pKoerqp3LeO/UFV/UVUPLF83bHrNu6vqeFV9oap+bDd/AQAA2Cv7Bts8neRnuvtPqupFSe6vqo8tz93e3f9h88ZV9eokNyf5/iR/L8n/qKq/392ndnLiAACw17Zcee7ux7v7T5b730zySJIrn+MlNyX5UHd/q7u/nOR4kmt3YrIAALBOz+uY56o6kOQ1ST69DL2zqh6sqvdX1YuXsSuTPLrpZSezIrar6nBVHauqY6eeevJ5TxwAAPbaOJ6r6ruT/G6Sn+ruv0ryviTfk+SaJI8n+eXTm654eT9roPuO7j7U3YcueeHlz3viAACw10bxXFWXZiOcf7O7fy9Juvur3X2qu/82ya/n24dmnExy9aaXX5XksZ2bMgAArMfkbBuV5M4kj3T3r2wa379psx9P8tBy/54kN1fVZVX1qiQHk3xm56YMAADrMTnbxuuSvC3J56rqgWXs55K8taquycYhGSeS/GSSdPfDVXV3ks9n40wdtznTBgAAF4It47m7/zirj2P+6HO85j1J3rONeQEAwDnHFQYBAGBIPAMAwJB4BgCAIfEMAABD4hkAAIbEMwAADIlnAAAYEs8AADAkngEAYEg8AwDAkHgGAIAh8QwAAEPiGQAAhsQzAAAMiWcAABgSzwAAMCSeAQBgSDwDAMCQeAYAgCHxDAAAQ+IZAACGxDMAAAyJZwAAGBLPAAAwJJ4BAGBo37on8HwdOHLvyvETR2/c45kAAHCxsfIMAABD4hkAAIbEMwAADIlnAAAYEs8AADAkngEAYEg8AwDAkHgGAIAh8QwAAEPiGQAAhsQzAAAMiWcAABgSzwAAMCSeAQBgSDwDAMCQeAYAgCHxDAAAQ+IZAACGxDMAAAyJZwAAGBLPAAAwJJ4BAGBIPAMAwJB4BgCAIfEMAABD4hkAAIbEMwAADIlnAAAYEs8AADAkngEAYEg8AwDAkHgGAIAh8QwAAEPiGQAAhsQzAAAMiWcAABgSzwAAMCSeAQBgSDwDAMCQeAYAgCHxDAAAQ+IZAACGxDMAAAyJZwAAGBLPAAAwJJ4BAGBoy3iuqqur6hNV9UhVPVxV71rGX1JVH6uqLy63L17Gq6reW1XHq+rBqnrtbv8SAACwFyYrz08n+Znu/r4k1yW5rapeneRIkvu6+2CS+5bHSfKmJAeXr8NJ3rfjswYAgDXYt9UG3f14kseX+9+sqkeSXJnkpiSvXza7K8knk/zsMv7B7u4kn6qqK6pq//J9ds2BI/euHD9x9Mbd/LEAAFxEntcxz1V1IMlrknw6yStPB/Fy+4plsyuTPLrpZSeXMQAAOK+N47mqvjvJ7yb5qe7+q+fadMVYr/h+h6vqWFUdO/XUk9NpAADA2oziuaouzUY4/2Z3/94y/NWq2r88vz/JE8v4ySRXb3r5VUkee+b37O47uvtQdx+65IWXn+38AQBgz0zOtlFJ7kzySHf/yqan7klyy3L/liQf2TT+9uWsG9cleXK3j3cGAIC9sOUHBpO8Lsnbknyuqh5Yxn4uydEkd1fVrUm+kuQty3MfTXJDkuNJnkryjh2dMQAArMnkbBt/nNXHMSfJG1ds30lu2+a8AADgnOMKgwAAMCSeAQBgSDwDAMDQ5AOD7CFXSgQAOHdZeQYAgCHxDAAAQ+IZAACGxDMAAAyJZwAAGBLPAAAwJJ4BAGBIPAMAwJB4BgCAIfEMAABD4hkAAIbEMwAADIlnAAAYEs8AADAkngEAYEg8AwDAkHgGAIChfeuewDocOHLvyvETR2/c45kAAHA+sfIMAABD4hkAAIYuysM2dsKqQz8c9gEAcGGz8gwAAEMX/MrzmT4cCAAAz5eVZwAAGBLPAAAwJJ4BAGBIPAMAwNAF/4HBveTKhQAAFzYrzwAAMCSeAQBgyGEbm7hqIAAAz8XKMwAADIlnAAAYEs8AADAkngEAYEg8AwDAkHgGAIAh8QwAAEPiGQAAhsQzAAAMiWcAABgSzwAAMCSeAQBgSDwDAMCQeAYAgCHxDAAAQ+IZAACGxDMAAAyJZwAAGBLPAAAwJJ4BAGBIPAMAwJB4BgCAIfEMAABD4hkAAIbEMwAADO1b9wTOdQeO3LvuKQAAcI6w8gwAAEPiGQAAhsQzAAAMiWcAABgSzwAAMCSeAQBgSDwDAMCQeAYAgCHxDAAAQ+IZAACGxDMAAAyJZwAAGNoynqvq/VX1RFU9tGnsF6rqL6rqgeXrhk3PvbuqjlfVF6rqx3Zr4gAAsNcmK88fSHL9ivHbu/ua5eujSVJVr05yc5LvX17za1V1yU5NFgAA1mnLeO7uP0ryteH3uynJh7r7W9395STHk1y7jfkBAMA5YzvHPL+zqh5cDut48TJ2ZZJHN21zchl7lqo6XFXHqurYqaee3MY0AABgb5xtPL8vyfckuSbJ40l+eRmvFdv2qm/Q3Xd096HuPnTJCy8/y2kAAMDeOat47u6vdvep7v7bJL+ebx+acTLJ1Zs2vSrJY9ubIgAAnBvOKp6rav+mhz+e5PSZOO5JcnNVXVZVr0pyMMlntjdFAAA4N+zbaoOq+q0kr0/ysqo6meTnk7y+qq7JxiEZJ5L8ZJJ098NVdXeSzyd5Oslt3X1qd6YOAAB7a8t47u63rhi+8zm2f0+S92xnUgAAcC5yhUEAABgSzwAAMCSeAQBgSDwDAMDQlh8YZPsOHLl35fiJozfu8UwAANgOK88AADAkngEAYEg8AwDAkHgGAIAh8QwAAEPiGQAAhsQzAAAMiWcAABgSzwAAMCSeAQBgSDwDAMCQeAYAgCHxDAAAQ+IZAACGxDMAAAyJZwAAGBLPAAAwJJ4BAGBIPAMAwJB4BgCAIfEMAABD4hkAAIbEMwAADIlnAAAYEs8AADC0b90TuJgdOHLvuqcAAMDzYOUZAACGxDMAAAw5bOMCtOpwkBNHb1zDTAAALixWngEAYMjK83nMBw4BAPaWlWcAABgSzwAAMCSeAQBgSDwDAMCQeAYAgCHxDAAAQ+IZAACGxDMAAAyJZwAAGBLPAAAwJJ4BAGBIPAMAwJB4BgCAIfEMAABD4hkAAIbEMwAADIlnAAAY2rfuCTBz4Mi9654CAMBFz8ozAAAMiWcAABgSzwAAMCSeAQBgSDwDAMCQeAYAgCHxDAAAQ+IZAACGxDMAAAyJZwAAGBLPAAAwJJ4BAGBIPAMAwJB4BgCAIfEMAABD4hkAAIbEMwAADIlnAAAY2jKeq+r9VfVEVT20aewlVfWxqvricvviZbyq6r1VdbyqHqyq1+7m5AEAYC9NVp4/kOT6Z4wdSXJfdx9Mct/yOEnelOTg8nU4yft2ZpoAALB+W8Zzd/9Rkq89Y/imJHct9+9K8uZN4x/sDZ9KckVV7d+pyQIAwDqd7THPr+zux5NkuX3FMn5lkkc3bXdyGQMAgPPeTn9gsFaM9coNqw5X1bGqOnbqqSd3eBoAALDzzjaev3r6cIzl9oll/GSSqzdtd1WSx1Z9g+6+o7sPdfehS154+VlOAwAA9s7ZxvM9SW5Z7t+S5CObxt++nHXjuiRPnj68AwAAznf7ttqgqn4ryeuTvKyqTib5+SRHk9xdVbcm+UqStyybfzTJDUmOJ3kqyTt2Yc4AALAWW8Zzd7/1DE+9ccW2neS27U4KAADORVvGMxeGA0fuXTl+4uiNezwTAIDzl8tzAwDAkHgGAIAh8QwAAEPiGQAAhsQzAAAMiWcAABgSzwAAMOQ8z4w5VzQAcLGz8gwAAEPiGQAAhsQzAAAMiWcAABgSzwAAMCSeAQBgSDwDAMCQeAYAgCHxDAAAQ+IZAACGXJ77IueS2wAAc1aeAQBgSDwDAMCQeAYAgCHxDAAAQ+IZAACGxDMAAAyJZwAAGBLPAAAwJJ4BAGBIPAMAwJB4BgCAoX3rngCcyYEj964cP3H0xj2eCQDABvHMnhLEAMD5zGEbAAAwZOWZlc60QgwAcDGz8gwAAEPiGQAAhsQzAAAMiWcAABgSzwAAMCSeAQBgSDwDAMCQeAYAgCHxDAAAQ+IZAACGxDMAAAyJZwAAGBLPAAAwJJ4BAGBIPAMAwJB4BgCAIfEMAABD4hkAAIbEMwAADIlnAAAYEs8AADAkngEAYEg8AwDAkHgGAIAh8QwAAEPiGQAAhsQzAAAMiWcAABgSzwAAMCSeAQBgSDwDAMDQvnVPgPPfgSP3PmvsxNEb1zATAIDdZeUZAACGrDyzK1atRu/k9gAA62DlGQAAhsQzAAAMOWyDC8KZDvvwwUUAYCdZeQYAgKFtrTxX1Ykk30xyKsnT3X2oql6S5LeTHEhyIsm/7O6vb2+aAACwfjux8vzD3X1Ndx9aHh9Jcl93H0xy3/IYAADOe7tx2MZNSe5a7t+V5M278DMAAGDPbTeeO8kfVtX9VXV4GXtldz+eJMvtK1a9sKoOV9Wxqjp26qkntzkNAADYfds928bruvuxqnpFko9V1Z9PX9jddyS5I0ku23+wtzkPAADYddtaee7ux5bbJ5J8OMm1Sb5aVfuTZLl9YruTBACAc8FZx3NVfVdVvej0/SQ/muShJPckuWXZ7JYkH9nuJAEA4FywncM2Xpnkw1V1+vv81+7+g6r6bJK7q+rWJF9J8pbtTxMAANbvrOO5u7+U5AdXjP/vJG/czqQAAOBc5AqDAAAwJJ4BAGBIPAMAwJB4BgCAIfEMAABD4hkAAIa2e3lu2HMHjty77ikAABcpK88AADAkngEAYEg8AwDAkHgGAIAh8QwAAEPiGQAAhsQzAAAMiWcAABhykRQuaKsuqHLi6I1rmAkAcCGw8gwAAEPiGQAAhsQzAAAMiWcAABgSzwAAMCSeAQBgSDwDAMCQeAYAgCHxDAAAQ+IZAACGxDMAAAyJZwAAGBLPAAAwJJ4BAGBIPAMAwJB4BgCAoX3rngCcKw4cuXfl+ImjN+7xTACAc5WVZwAAGBLPAAAwJJ4BAGBIPAMAwJB4BgCAIfEMAABD4hkAAIbEMwAADIlnAAAYcoVBLjpnupIgAMBWrDwDAMCQeAYAgCHxDAAAQ455hh206njqE0dvXMNMAIDdYOUZAACGrDzDeeBMZwixqg0Ae8vKMwAADFl5hi04LzQAcJqVZwAAGBLPAAAw5LAN2GU+7AcAFw4rzwAAMCSeAQBgSDwDAMCQeAYAgCHxDAAAQ862AWvi4isAcP6x8gwAAEPiGQAAhsQzAAAMiWcAABjygUG4wLgcOADsHivPAAAwJJ4BAGBIPAMAwFB197rnkMv2H+z9t/zquqcBFx3HQQNwsamq+7v70Nm+3gcG4SLmw4UA8Pw4bAMAAIasPAPPcqYV6VWsUgNwMbHyDAAAQ7u28lxV1yf5j0kuSfIb3X10t34WsD6OmwbgYrIr8VxVlyT5T0n+WZKTST5bVfd09+d34+cB555VUX2moH4+2wLAOu3WYRvXJjne3V/q7v+T5ENJbtqlnwUAAHtiV87zXFU/keT67v7Xy+O3Jfmh7n7npm0OJzm8PPyBJA/t+EQ4370syV+uexKcc+wXrGK/YBX7Bav8g+5+0dm+eLeOea4VY/9fpXf3HUnuSJKqOradk1VzYbJfsIr9glXsF6xiv2CVqjq2ndfv1mEbJ5NcvenxVUke26WfBQAAe2K34vmzSQ5W1auq6juS3Jzknl36WQAAsCd25bCN7n66qt6Z5L9n41R17+/uh5/jJXfsxjw479kvWMV+wSr2C1axX7DKtvaLXfnAIAAAXIhcYRAAAIbEMwAADK09nqvq+qr6QlUdr6oj654P61NVJ6rqc1X1wOnTyFTVS6rqY1X1xeX2xeueJ7urqt5fVU9U1UObxlbuB7Xhvcv7x4NV9dr1zZzddIb94heq6i+W94wHquqGTc+9e9kvvlBVP7aeWbObqurqqvpEVT1SVQ9X1buWce8XF7Hn2C927P1irfG86TLeb0ry6iRvrapXr3NOrN0Pd/c1m87LeSTJfd19MMl9y2MubB9Icv0zxs60H7wpycHl63CS9+3RHNl7H8iz94skuX15z7imuz+aJMu/Izcn+f7lNb+2/HvDheXpJD/T3d+X5Lokty3/7b1fXNzOtF8kO/R+se6VZ5fxZis3JblruX9XkjevcS7sge7+oyRfe8bwmfaDm5J8sDd8KskVVbV/b2bKXjrDfnEmNyX5UHd/q7u/nOR4Nv694QLS3Y93958s97+Z5JEkV8b7xUXtOfaLM3ne7xfrjucrkzy66fHJPPcvyIWtk/xhVd2/XL49SV7Z3Y8nG/9DJHnF2mbHOp1pP/AewjuXP8G/f9NhXfaLi0xVHUjymiSfjvcLFs/YL5Ider9YdzxveRlvLiqv6+7XZuNPa7dV1T9d94Q453kPubi9L8n3JLkmyeNJfnkZt19cRKrqu5P8bpKf6u6/eq5NV4zZLy5QK/aLHXu/WHc8u4w3/093P7bcPpHkw9n4s8lXT/9Zbbl9Yn0zZI3OtB94D7mIdfdXu/tUd/9tkl/Pt//Uar+4SFTVpdkIpN/s7t9bhr1fXORW7Rc7+X6x7nh2GW+SJFX1XVX1otP3k/xokoeysT/csmx2S5KPrGeGrNmZ9oN7krx9+RT9dUmePP3nWi58zzhe9cez8Z6RbOwXN1fVZVX1qmx8QOwzez0/dldVVZI7kzzS3b+y6SnvFxexM+0XO/l+sSuX5546i8t4c+F6ZZIPb+zz2Zfkv3b3H1TVZ5PcXVW3JvlKkrescY7sgar6rSSvT/KyqjqZ5OeTHM3q/eCjSW7Ixgc8nkryjj2fMHviDPvF66vqmmz8ifVEkp9Mku5+uKruTvL5bHzy/rbuPrWOebOrXpfkbUk+V1UPLGM/F+8XF7sz7Rdv3an3C5fnBgCAoXUftgEAAOcN8QwAAEPiGQAAhsQzAAAMiWcAABgSzwAAMCSeAQBg6P8CoArimUj5xeoAAAAASUVORK5CYII=\n",
      "text/plain": [
       "<Figure size 864x864 with 1 Axes>"
      ]
     },
     "metadata": {
      "needs_background": "light"
     },
     "output_type": "display_data"
    },
    {
     "data": {
      "image/png": "iVBORw0KGgoAAAANSUhEUgAAAs8AAAKvCAYAAACVhiLtAAAABHNCSVQICAgIfAhkiAAAAAlwSFlzAAALEgAACxIB0t1+/AAAADh0RVh0U29mdHdhcmUAbWF0cGxvdGxpYiB2ZXJzaW9uMy4xLjMsIGh0dHA6Ly9tYXRwbG90bGliLm9yZy+AADFEAAAeN0lEQVR4nO3df8ydZ33f8c93dghNoQk/I8+OZES9DehUw7w0UqQpha6EuJqDRKagCSyUyUwKEqhow/APVBqSKw3CkNZIpskIUwtE/FAinHXNAgjxBwGHpiEhRXjgERMrFiMYUNRMca/98dweT+1jP1/7+XH84/WSHp1zrnOf81wWNydvXc997rvGGAEAAJb2D+Y9AQAAOF+IZwAAaBLPAADQJJ4BAKBJPAMAQJN4BgCApnY8V9W6qvqrqvrS9PgVVfVgVX2/qj5bVc+bxi+dHh+Ynt+8OlMHAIC1dSYrz+9O8viix3+c5LYxxpYkTye5ZRq/JcnTY4zfTHLbtB0AAJz3WvFcVZuSbE/yp9PjSvL6JJ+bNrkryY3T/R3T40zPv2HaHgAAzmvrm9t9LMl/SPLC6fFLkvxsjPHc9PhQko3T/Y1JnkiSMcZzVXV02v4ni9+wqnYl2ZUkdcnz/9klL9l00i/9pxsvb/9DAABgKQ899NBPxhgvO9vXLxnPVfUHSY6MMR6qquuOD8/YdDSe+9XAGHuT7E2SSzdsGRt2fuykF+3fs32p6QEAQFtV/e/lvL6z8nxtkn9VVTckeX6S38jCSvQVVbV+Wn3elOTJaftDSa5Kcqiq1ie5PMlPlzNJAAA4Fyx5zPMY4/1jjE1jjM1Jbk7y5THGv0nylSRvmTbbmeSe6f690+NMz395jHHSyjMAAJxvlnOe5/cl+cOqOpCFY5rvmMbvSPKSafwPk+xe3hQBAODc0P3CYJJkjPHVJF+d7v8gydUztvnbJDetwNwAAOCc4gqDAADQJJ4BAKBJPAMAQJN4BgCAJvEMAABN4hkAAJrEMwAANIlnAABoEs8AANAkngEAoEk8AwBAk3gGAIAm8QwAAE3iGQAAmsQzAAA0iWcAAGgSzwAA0CSeAQCgSTwDAECTeAYAgCbxDAAATeIZAACaxDMAADSJZwAAaBLPAADQJJ4BAKBJPAMAQJN4BgCAJvEMAABN4hkAAJrEMwAANIlnAABoEs8AANAkngEAoEk8AwBAk3gGAIAm8QwAAE3iGQAAmsQzAAA0iWcAAGgSzwAA0CSeAQCgSTwDAECTeAYAgCbxDAAATeIZAACaxDMAADSJZwAAaBLPAADQJJ4BAKBJPAMAQJN4BgCAJvEMAABN4hkAAJrEMwAANIlnAABoEs8AANAkngEAoEk8AwBAk3gGAIAm8QwAAE3iGQAAmsQzAAA0iWcAAGgSzwAA0CSeAQCgSTwDAECTeAYAgCbxDAAATeIZAACaxDMAADSJZwAAaBLPAADQtGQ8V9Xzq+qbVfXXVfVYVf3RNP7JqvphVT08/WydxquqPl5VB6rqkap63Wr/IwAAYC2sb2zzbJLXjzF+WVWXJPl6Vf336bl/P8b43AnbvynJlunnd5LcPt0CAMB5bcmV57Hgl9PDS6afcZqX7Ejyqel130hyRVVtWP5UAQBgvlrHPFfVuqp6OMmRJPePMR6cnvrwdGjGbVV16TS2MckTi15+aBo78T13VdX+qtp/7Jmjy/gnAADA2mjF8xjj2Bhja5JNSa6uqt9K8v4k/yTJP0/y4iTvmzavWW8x4z33jjG2jTG2rbvs8rOaPAAArKUzOtvGGONnSb6a5PoxxuHp0Ixnk/zXJFdPmx1KctWil21K8uQKzBUAAOaqc7aNl1XVFdP9X0vye0n+5vhxzFVVSW5M8uj0knuTvH0668Y1SY6OMQ6vyuwBAGANdc62sSHJXVW1LguxffcY40tV9eWqelkWDtN4OMm/m7a/L8kNSQ4keSbJO1Z+2gAAsPaWjOcxxiNJXjtj/PWn2H4kuXX5UwMAgHOLKwwCAECTeAYAgCbxDAAATeIZAACaxDMAADSJZwAAaBLPAADQJJ4BAKBJPAMAQJN4BgCAJvEMAABN4hkAAJrEMwAANIlnAABoEs8AANAkngEAoEk8AwBAk3gGAIAm8QwAAE3iGQAAmsQzAAA0iWcAAGgSzwAA0CSeAQCgSTwDAECTeAYAgCbxDAAATeIZAACaxDMAADSJZwAAaBLPAADQJJ4BAKBJPAMAQJN4BgCAJvEMAABN4hkAAJrEMwAANIlnAABoEs8AANAkngEAoEk8AwBAk3gGAIAm8QwAAE3iGQAAmsQzAAA0iWcAAGgSzwAA0CSeAQCgSTwDAECTeAYAgCbxDAAATeIZAACaxDMAADSJZwAAaBLPAADQJJ4BAKBJPAMAQJN4BgCAJvEMAABN4hkAAJrEMwAANIlnAABoEs8AANC0ft4TOJ3Nu/edNHZwz/Y5zAQAAKw8AwBAm3gGAIAm8QwAAE3iGQAAmsQzAAA0iWcAAGgSzwAA0CSeAQCgacl4rqrnV9U3q+qvq+qxqvqjafwVVfVgVX2/qj5bVc+bxi+dHh+Ynt+8uv8EAABYG52V52eTvH6M8dtJtia5vqquSfLHSW4bY2xJ8nSSW6btb0ny9BjjN5PcNm0HAADnvSXjeSz45fTwkulnJHl9ks9N43cluXG6v2N6nOn5N1RVrdiMAQBgTlrHPFfVuqp6OMmRJPcn+V9JfjbGeG7a5FCSjdP9jUmeSJLp+aNJXrKSkwYAgHloxfMY49gYY2uSTUmuTvKqWZtNt7NWmceJA1W1q6r2V9X+Y88c7c4XAADm5ozOtjHG+FmSrya5JskVVbV+empTkien+4eSXJUk0/OXJ/npjPfaO8bYNsbYtu6yy89u9gAAsIY6Z9t4WVVdMd3/tSS/l+TxJF9J8pZps51J7pnu3zs9zvT8l8cYJ608AwDA+Wb90ptkQ5K7qmpdFmL77jHGl6rqu0k+U1X/MclfJblj2v6OJP+tqg5kYcX55lWYNwAArLkl43mM8UiS184Y/0EWjn8+cfxvk9y0IrMDAIBziCsMAgBAk3gGAIAm8QwAAE3iGQAAmsQzAAA0iWcAAGgSzwAA0CSeAQCgSTwDAECTeAYAgCbxDAAATeIZAACaxDMAADSJZwAAaBLPAADQJJ4BAKBJPAMAQJN4BgCAJvEMAABN4hkAAJrEMwAANIlnAABoEs8AANAkngEAoEk8AwBAk3gGAIAm8QwAAE3iGQAAmsQzAAA0iWcAAGgSzwAA0CSeAQCgSTwDAECTeAYAgCbxDAAATeIZAACaxDMAADSJZwAAaBLPAADQJJ4BAKBJPAMAQJN4BgCAJvEMAABN4hkAAJrEMwAANIlnAABoEs8AANAkngEAoEk8AwBAk3gGAIAm8QwAAE3iGQAAmsQzAAA0iWcAAGgSzwAA0CSeAQCgSTwDAECTeAYAgCbxDAAATeIZAACaxDMAADSJZwAAaBLPAADQJJ4BAKBJPAMAQJN4BgCAJvEMAABN4hkAAJrEMwAANIlnAABoEs8AANC0ft4TOFObd++bOX5wz/Y1ngkAABcbK88AANC0ZDxX1VVV9ZWqeryqHquqd0/jH6qqH1fVw9PPDYte8/6qOlBV36uqN67mPwAAANZK57CN55K8d4zx7ap6YZKHqur+6bnbxhj/afHGVfXqJDcneU2Sf5jkf1bVPxpjHFvJiQMAwFpbcuV5jHF4jPHt6f4vkjyeZONpXrIjyWfGGM+OMX6Y5ECSq1disgAAME9ndMxzVW1O8tokD05D76qqR6rqzqp60TS2MckTi152KDNiu6p2VdX+qtp/7JmjZzxxAABYa+14rqoXJPl8kveMMX6e5PYkr0yyNcnhJB85vumMl4+TBsbYO8bYNsbYtu6yy8944gAAsNZa8VxVl2QhnP9sjPGFJBljPDXGODbG+Lskn8ivDs04lOSqRS/flOTJlZsyAADMR+dsG5XkjiSPjzE+umh8w6LN3pzk0en+vUlurqpLq+oVSbYk+ebKTRkAAOajc7aNa5O8Lcl3qurhaewDSd5aVVuzcEjGwSTvTJIxxmNVdXeS72bhTB23OtMGAAAXgiXjeYzx9cw+jvm+07zmw0k+vIx5AQDAOccVBgEAoEk8AwBAk3gGAIAm8QwAAE3iGQAAmsQzAAA0iWcAAGgSzwAA0CSeAQCgSTwDAECTeAYAgCbxDAAATeIZAACaxDMAADSJZwAAaBLPAADQJJ4BAKBJPAMAQJN4BgCAJvEMAABN4hkAAJrEMwAANIlnAABoEs8AANAkngEAoEk8AwBAk3gGAIAm8QwAAE3iGQAAmsQzAAA0iWcAAGgSzwAA0CSeAQCgSTwDAECTeAYAgCbxDAAATeIZAACaxDMAADStn/cE+Ps27943c/zgnu1rPBMAAE5k5RkAAJrEMwAANIlnAABoEs8AANAkngEAoEk8AwBAk3gGAIAm8QwAAE3iGQAAmsQzAAA0iWcAAGgSzwAA0CSeAQCgSTwDAECTeAYAgCbxDAAATeIZAACa1s97Aqtt8+59J40d3LN9DjMBAOB8Z+UZAACaxDMAADSJZwAAaBLPAADQJJ4BAKBJPAMAQJN4BgCAJvEMAABN4hkAAJrEMwAANIlnAABoEs8AANAkngEAoEk8AwBAk3gGAICmJeO5qq6qqq9U1eNV9VhVvXsaf3FV3V9V359uXzSNV1V9vKoOVNUjVfW61f5HAADAWuisPD+X5L1jjFcluSbJrVX16iS7kzwwxtiS5IHpcZK8KcmW6WdXkttXfNYAADAH65faYIxxOMnh6f4vqurxJBuT7Ehy3bTZXUm+muR90/inxhgjyTeq6oqq2jC9z6rZvHvfar49AACc2THPVbU5yWuTPJjkyuNBPN2+fNpsY5InFr3s0DQGAADntXY8V9ULknw+yXvGGD8/3aYzxsaM99tVVfurav+xZ452pwEAAHPTiuequiQL4fxnY4wvTMNPVdWG6fkNSY5M44eSXLXo5ZuSPHnie44x9o4xto0xtq277PKznT8AAKyZztk2KskdSR4fY3x00VP3Jtk53d+Z5J5F42+fzrpxTZKjq328MwAArIUlvzCY5Nokb0vynap6eBr7QJI9Se6uqluS/CjJTdNz9yW5IcmBJM8keceKzhgAAOakc7aNr2f2ccxJ8oYZ248kty5zXgAAcM5xhUEAAGgSzwAA0CSeAQCgSTwDAECTeAYAgCbxDAAATeIZAACaxDMAADSJZwAAaBLPAADQJJ4BAKBJPAMAQJN4BgCAJvEMAABN4hkAAJrEMwAANIlnAABoEs8AANAkngEAoGn9vCdwMdu8e9+8pwAAwBmw8gwAAE3iGQAAmsQzAAA0iWcAAGgSzwAA0CSeAQCgSTwDAECTeAYAgCbxDAAATeIZAACaxDMAADSJZwAAaBLPAADQJJ4BAKBJPAMAQJN4BgCAJvEMAABN4hkAAJrEMwAANIlnAABoEs8AANAkngEAoEk8AwBAk3gGAIAm8QwAAE3r5z2Bedi8e9/M8YN7tq/xTAAAOJ9YeQYAgCbxDAAATeIZAACaxDMAADSJZwAAaBLPAADQJJ4BAKDpojzP85lwTmgAAI6z8gwAAE1WntfAqVavAQA4v1h5BgCAJvEMAABN4hkAAJrEMwAANPnC4CK+2AcAwOlYeQYAgCbxDAAATeIZAACaxDMAADSJZwAAaBLPAADQJJ4BAKBJPAMAQJN4BgCAJvEMAABN4hkAAJrEMwAANC0Zz1V1Z1UdqapHF419qKp+XFUPTz83LHru/VV1oKq+V1VvXK2JAwDAWuusPH8yyfUzxm8bY2ydfu5Lkqp6dZKbk7xmes2fVNW6lZosAADM05LxPMb4WpKfNt9vR5LPjDGeHWP8MMmBJFcvY34AAHDOWL+M176rqt6eZH+S944xnk6yMck3Fm1zaBo7SVXtSrIrSdb9xsuWMY352Lx730ljB/dsn8NMAABYK2f7hcHbk7wyydYkh5N8ZBqvGduOWW8wxtg7xtg2xti27rLLz3IaAACwds5q5XmM8dTx+1X1iSRfmh4eSnLVok03JXnyrGd3npm1Gg0AwIXjrFaeq2rDoodvTnL8TBz3Jrm5qi6tqlck2ZLkm8ubIgAAnBuWXHmuqk8nuS7JS6vqUJIPJrmuqrZm4ZCMg0nemSRjjMeq6u4k303yXJJbxxjHVmfqAACwtpaM5zHGW2cM33Ga7T+c5MPLmRQAAJyLXGEQAACaxDMAADSJZwAAaBLPAADQJJ4BAKBJPAMAQJN4BgCAJvEMAABN4hkAAJrEMwAANIlnAABoEs8AANAkngEAoEk8AwBAk3gGAIAm8QwAAE3iGQAAmsQzAAA0iWcAAGgSzwAA0CSeAQCgSTwDAECTeAYAgCbxDAAATeIZAACaxDMAADSJZwAAaBLPAADQJJ4BAKBJPAMAQJN4BgCAJvEMAABN4hkAAJrEMwAANIlnAABoWj/vCdCzefe+k8YO7tk+h5kAAFy8rDwDAECTeAYAgCbxDAAATeIZAACaxDMAADSJZwAAaBLPAADQJJ4BAKBJPAMAQJN4BgCAJvEMAABN4hkAAJrEMwAANIlnAABoWj/vCXD2Nu/eN3P84J7tazwTAICLg5VnAABoEs8AANAkngEAoEk8AwBAk3gGAIAm8QwAAE3iGQAAmsQzAAA0iWcAAGgSzwAA0CSeAQCgSTwDAECTeAYAgCbxDAAATeIZAACaxDMAADSJZwAAaBLPAADQtH7eE2Dlbd6976Sxg3u2z2EmAAAXFivPAADQJJ4BAKBpyXiuqjur6khVPbpo7MVVdX9VfX+6fdE0XlX18ao6UFWPVNXrVnPyAACwljorz59Mcv0JY7uTPDDG2JLkgelxkrwpyZbpZ1eS21dmmgAAMH9LxvMY42tJfnrC8I4kd03370py46LxT40F30hyRVVtWKnJAgDAPJ3tMc9XjjEOJ8l0+/JpfGOSJxZtd2gaAwCA895Kf2GwZoyNmRtW7aqq/VW1/9gzR1d4GgAAsPLONp6fOn44xnR7ZBo/lOSqRdttSvLkrDcYY+wdY2wbY2xbd9nlZzkNAABYO2cbz/cm2Tnd35nknkXjb5/OunFNkqPHD+8AAIDz3ZJXGKyqTye5LslLq+pQkg8m2ZPk7qq6JcmPktw0bX5fkhuSHEjyTJJ3rMKcAQBgLpaM5zHGW0/x1BtmbDuS3LrcSQEAwLnIFQYBAKBJPAMAQJN4BgCAJvEMAABN4hkAAJrEMwAANIlnAABoEs8AANAkngEAoEk8AwBAk3gGAICm9fOeAGtj8+59Z7T9wT3bV2kmAADnLyvPAADQZOWZc9apVsutigMA82LlGQAAmsQzAAA0iWcAAGgSzwAA0CSeAQCgSTwDAECTeAYAgCbxDAAATeIZAACaxDMAADSJZwAAaBLPAADQJJ4BAKBJPAMAQJN4BgCAJvEMAABN4hkAAJrEMwAANIlnAABoEs8AANAkngEAoEk8AwBAk3gGAICm9fOeAOePzbv3zRw/uGf7Gs8EAGA+rDwDAECTeAYAgCbxDAAATeIZAACaxDMAADSJZwAAaBLPAADQJJ4BAKBJPAMAQJN4BgCAJvEMAABN6+c9Ac5Nm3fvm/cUAADOOVaeAQCgSTwDAECTeAYAgCbHPLNss46PPrhn+xxmAgCwuqw8AwBAk3gGAIAm8QwAAE2OeWZNner80Y6RBgDOB1aeAQCgSTwDAECTeAYAgCbxDAAATeIZAACaxDMAADSJZwAAaBLPAADQ5CIprIpTXQwFAOB8ZuUZAACaxDMAADSJZwAAaBLPAADQJJ4BAKBJPAMAQNOyTlVXVQeT/CLJsSTPjTG2VdWLk3w2yeYkB5P86zHG08ubJgAAzN9KrDz/7hhj6xhj2/R4d5IHxhhbkjwwPQYAgPPeahy2sSPJXdP9u5LcuAq/AwAA1txy43kk+cuqeqiqdk1jV44xDifJdPvyWS+sql1Vtb+q9h975ugypwEAAKtvuZfnvnaM8WRVvTzJ/VX1N90XjjH2JtmbJJdu2DKWOQ8AAFh1y1p5HmM8Od0eSfLFJFcneaqqNiTJdHtkuZMEAIBzwVnHc1X9elW98Pj9JL+f5NEk9ybZOW22M8k9y50kAACcC5Zz2MaVSb5YVcff58/HGH9RVd9KcndV3ZLkR0luWv40AQBg/s46nscYP0jy2zPG/0+SNyxnUnCmNu/eN3P84J7tazwTAOBC5gqDAADQJJ4BAKBJPAMAQJN4BgCApuVeJAXW3Km+HAgAsNqsPAMAQJN4BgCAJvEMAABN4hkAAJrEMwAANIlnAABoEs8AANAkngEAoEk8AwBAkysMck5w1UAA4Hxg5RkAAJrEMwAANIlnAABoEs8AANAkngEAoEk8AwBAk3gGAIAm53nmgjbr/NEH92yfw0wAgAuBlWcAAGgSzwAA0CSeAQCgSTwDAECTeAYAgCbxDAAATeIZAACanOcZJrPOCZ04LzQA8CtWngEAoMnKMxedU60wAwAsxcozAAA0iWcAAGgSzwAA0CSeAQCgSTwDAECTeAYAgCbxDAAATeIZAACaxDMAADSJZwAAaHJ5bljCrMt5H9yzfQ4zAQDmzcozAAA0iWcAAGgSzwAA0CSeAQCgSTwDAECTeAYAgCanqoOzMOv0dYlT2AHAhU48wwpyTmgAuLA5bAMAAJrEMwAANIlnAABoEs8AANAkngEAoEk8AwBAk3gGAIAm8QwAAE3iGQAAmlxhEC4wLh0OAKvHyjMAADRZeYZzzKlWjmexmgwAa0s8wyo7kxgGAM5tDtsAAIAm8QwAAE3iGQAAmsQzAAA0+cIgXCRmfXHR2ToA4MxYeQYAgKYaY8x7Drl0w5axYefH5j0NYLJaK9KufgjAvFXVQ2OMbWf7eivPAADQtGrHPFfV9Un+c5J1Sf50jLFntX4XMD9WkwG4mKxKPFfVuiT/Jcm/THIoybeq6t4xxndX4/cBa8PVEgG42K3WYRtXJzkwxvjBGOP/JvlMkh2r9LsAAGBNrMoXBqvqLUmuH2P82+nx25L8zhjjXYu22ZVk1/Twt5I8uuIT4Xz30iQ/mfckOOfYL5jFfsEs9gtm+cdjjBee7YtX65jnmjH29yp9jLE3yd4kqar9y/nWIxcm+wWz2C+YxX7BLPYLZqmq/ct5/WodtnEoyVWLHm9K8uQq/S4AAFgTqxXP30qypapeUVXPS3JzkntX6XcBAMCaWJXDNsYYz1XVu5L8jyycqu7OMcZjp3nJ3tWYB+c9+wWz2C+YxX7BLPYLZlnWfnFOXGEQAADOB64wCAAATeIZAACa5h7PVXV9VX2vqg5U1e55z4f5qaqDVfWdqnr4+GlkqurFVXV/VX1/un3RvOfJ6qqqO6vqSFU9umhs5n5QCz4+fX48UlWvm9/MWU2n2C8+VFU/nj4zHq6qGxY99/5pv/heVb1xPrNmNVXVVVX1lap6vKoeq6p3T+M+Ly5ip9kvVuzzYq7xvOgy3m9K8uokb62qV89zTszd744xti46L+fuJA+MMbYkeWB6zIXtk0muP2HsVPvBm5JsmX52Jbl9jebI2vtkTt4vkuS26TNj6xjjviSZ/jtyc5LXTK/5k+m/N1xYnkvy3jHGq5Jck+TW6X97nxcXt1PtF8kKfV7Me+XZZbxZyo4kd03370py4xznwhoYY3wtyU9PGD7VfrAjyafGgm8kuaKqNqzNTFlLp9gvTmVHks+MMZ4dY/wwyYEs/PeGC8gY4/AY49vT/V8keTzJxvi8uKidZr84lTP+vJh3PG9M8sSix4dy+n8gF7aR5C+r6qHp8u1JcuUY43Cy8H+IJC+f2+yYp1PtBz5DeNf0J/g7Fx3WZb+4yFTV5iSvTfJgfF4wOWG/SFbo82Le8bzkZby5qFw7xnhdFv60dmtV/Yt5T4hzns+Qi9vtSV6ZZGuSw0k+Mo3bLy4iVfWCJJ9P8p4xxs9Pt+mMMfvFBWrGfrFinxfzjmeX8eb/G2M8Od0eSfLFLPzZ5Knjf1abbo/Mb4bM0an2A58hF7ExxlNjjGNjjL9L8on86k+t9ouLRFVdkoVA+rMxxhemYZ8XF7lZ+8VKfl7MO55dxpskSVX9elW98Pj9JL+f5NEs7A87p812JrlnPjNkzk61H9yb5O3Tt+ivSXL0+J9rufCdcLzqm7PwmZEs7Bc3V9WlVfWKLHxB7JtrPT9WV1VVkjuSPD7G+Oiip3xeXMROtV+s5OfFqlyeu+ssLuPNhevKJF9c2OezPsmfjzH+oqq+leTuqrolyY+S3DTHObIGqurTSa5L8tKqOpTkg0n2ZPZ+cF+SG7LwBY9nkrxjzSfMmjjFfnFdVW3Nwp9YDyZ5Z5KMMR6rqruTfDcL37y/dYxxbB7zZlVdm+RtSb5TVQ9PYx+Iz4uL3an2i7eu1OeFy3MDAEDTvA/bAACA84Z4BgCAJvEMAABN4hkAAJrEMwAANIlnAABoEs8AAND0/wDzyNUSiW7mJQAAAABJRU5ErkJggg==\n",
      "text/plain": [
       "<Figure size 864x864 with 1 Axes>"
      ]
     },
     "metadata": {
      "needs_background": "light"
     },
     "output_type": "display_data"
    },
    {
     "data": {
      "image/png": "iVBORw0KGgoAAAANSUhEUgAAAs8AAAKvCAYAAACVhiLtAAAABHNCSVQICAgIfAhkiAAAAAlwSFlzAAALEgAACxIB0t1+/AAAADh0RVh0U29mdHdhcmUAbWF0cGxvdGxpYiB2ZXJzaW9uMy4xLjMsIGh0dHA6Ly9tYXRwbG90bGliLm9yZy+AADFEAAAeEElEQVR4nO3db4yl51nf8d9Vr3EIpHb+a2tb2gi2LYEKJ3WNpUhVSCg4dlUbiVSOqsSKXC2VHCkI1LLhDSA10iIVTCMVSwancSogWEAUC7sU10mEeJE/62AcOybKNtnGiy1bNIkJskjl5eqLedwM3lnP5Z0/Z3b385FGc859njNzr/Lk+Kt77nOe6u4AAACb+3urngAAAJwtxDMAAAyJZwAAGBLPAAAwJJ4BAGBIPAMAwNA4nqvqgqr606r6g+X+66rq01X1par6nar6jmX8ouX+seXxAzszdQAA2F0vZuX5vUkeXXf/l5Lc2t0Hk3w9yc3L+M1Jvt7d35vk1uU4AAA4643iuaouS3Jdkt9Y7leStyT53eWQO5PcsNy+frmf5fG3LscDAMBZbd/wuF9N8h+SvGy5/8ok3+juZ5f7J5Jcuty+NMljSdLdz1bV08vxf7n+B1bVoSSHkqQufMk/vfCVl53yS//JpReP/yEAALCZBx544C+7+9Vn+vxN47mq/mWSp7r7gap683PDGxzag8e+PdB9e5Lbk+Si/Qd7/02/esqTjh65brPpAQDAWFX97608f7Ly/KYk/6qqrk3ykiR/P2sr0ZdU1b5l9fmyJI8vx59IcnmSE1W1L8nFSb62lUkCAMBesOme5+5+X3df1t0HktyY5OPd/W+SfCLJTyyH3ZTkY8vtu5f7WR7/eHefsvIMAABnm618zvPPJvnpqjqWtT3NdyzjdyR55TL+00kOb22KAACwN0zfMJgk6e5PJvnkcvvLSa7a4Ji/SfL2bZgbAADsKa4wCAAAQ+IZAACGxDMAAAyJZwAAGBLPAAAwJJ4BAGBIPAMAwJB4BgCAIfEMAABD4hkAAIbEMwAADIlnAAAYEs8AADAkngEAYEg8AwDAkHgGAIAh8QwAAEPiGQAAhsQzAAAMiWcAABgSzwAAMCSeAQBgSDwDAMCQeAYAgCHxDAAAQ+IZAACGxDMAAAyJZwAAGBLPAAAwJJ4BAGBIPAMAwJB4BgCAIfEMAABD4hkAAIbEMwAADIlnAAAYEs8AADAkngEAYEg8AwDAkHgGAIAh8QwAAEPiGQAAhsQzAAAMiWcAABgSzwAAMCSeAQBgSDwDAMCQeAYAgCHxDAAAQ+IZAACGxDMAAAyJZwAAGBLPAAAwJJ4BAGBIPAMAwJB4BgCAIfEMAABD4hkAAIbEMwAADIlnAAAYEs8AADAkngEAYEg8AwDAkHgGAIAh8QwAAEPiGQAAhsQzAAAMiWcAABgSzwAAMCSeAQBgSDwDAMCQeAYAgCHxDAAAQ5vGc1W9pKo+U1V/VlWPVNUvLuMfqqqvVNWDy9cVy3hV1Qeq6lhVPVRVb9zpfwQAAOyGfYNjvpXkLd3911V1YZI/qar/vjz277v7d593/NuSHFy+fijJbct3AAA4q2268txr/nq5e+Hy1S/wlOuTfHh53qeSXFJV+7c+VQAAWK3RnuequqCqHkzyVJL7uvvTy0PvX7Zm3FpVFy1jlyZ5bN3TTyxjz/+Zh6rqaFUdPfnM01v4JwAAwO4YxXN3n+zuK5JcluSqqvqBJO9L8o+T/LMkr0jys8vhtdGP2OBn3t7dV3b3lRe89OIzmjwAAOymF/VpG939jSSfTHJNdz+xbM34VpL/muSq5bATSS5f97TLkjy+DXMFAICVmnzaxqur6pLl9ncm+ZEkf/7cPuaqqiQ3JHl4ecrdSd61fOrG1Ume7u4ndmT2AACwiyaftrE/yZ1VdUHWYvuu7v6Dqvp4Vb06a9s0Hkzy75bj701ybZJjSZ5J8u7tnzYAAOy+TeO5ux9K8oYNxt9ymuM7yS1bnxoAAOwtrjAIAABD4hkAAIbEMwAADIlnAAAYEs8AADAkngEAYEg8AwDAkHgGAIAh8QwAAEPiGQAAhja9PPcqHTh8zyljx49ct4KZAACAlWcAABgTzwAAMCSeAQBgSDwDAMCQeAYAgCHxDAAAQ+IZAACGxDMAAAyJZwAAGBLPAAAwJJ4BAGBIPAMAwJB4BgCAIfEMAABD4hkAAIbEMwAADIlnAAAYEs8AADAkngEAYEg8AwDAkHgGAIAh8QwAAEPiGQAAhsQzAAAMiWcAABgSzwAAMCSeAQBgSDwDAMCQeAYAgCHxDAAAQ+IZAACGxDMAAAyJZwAAGBLPAAAwJJ4BAGBIPAMAwJB4BgCAIfEMAABD4hkAAIbEMwAADIlnAAAYEs8AADAkngEAYEg8AwDAkHgGAIAh8QwAAEPiGQAAhsQzAAAMiWcAABgSzwAAMCSeAQBgSDwDAMCQeAYAgCHxDAAAQ+IZAACGxDMAAAyJZwAAGBLPAAAwJJ4BAGBIPAMAwJB4BgCAoU3juapeUlWfqao/q6pHquoXl/HXVdWnq+pLVfU7VfUdy/hFy/1jy+MHdvafAAAAu2Oy8vytJG/p7h9MckWSa6rq6iS/lOTW7j6Y5OtJbl6OvznJ17v7e5PcuhwHAABnvU3judf89XL3wuWrk7wlye8u43cmuWG5ff1yP8vjb62q2rYZAwDAioz2PFfVBVX1YJKnktyX5H8l+UZ3P7scciLJpcvtS5M8liTL408neeV2ThoAAFZhFM/dfbK7r0hyWZKrknzfRoct3zdaZe7nD1TVoao6WlVHTz7z9HS+AACwMi/q0za6+xtJPpnk6iSXVNW+5aHLkjy+3D6R5PIkWR6/OMnXNvhZt3f3ld195QUvvfjMZg8AALto8mkbr66qS5bb35nkR5I8muQTSX5iOeymJB9bbt+93M/y+Me7+5SVZwAAONvs2/yQ7E9yZ1VdkLXYvqu7/6CqvpDkI1X1H5P8aZI7luPvSPLfqupY1lacb9yBeQMAwK7bNJ67+6Ekb9hg/MtZ2//8/PG/SfL2bZkdAADsIa4wCAAAQ+IZAACGxDMAAAyJZwAAGBLPAAAwJJ4BAGBIPAMAwJB4BgCAIfEMAABD4hkAAIbEMwAADIlnAAAYEs8AADAkngEAYEg8AwDAkHgGAIAh8QwAAEPiGQAAhsQzAAAMiWcAABgSzwAAMCSeAQBgSDwDAMCQeAYAgCHxDAAAQ+IZAACGxDMAAAyJZwAAGBLPAAAwJJ4BAGBIPAMAwJB4BgCAIfEMAABD4hkAAIb2rXoC/F0HDt+z4fjxI9ft8kwAAHg+K88AADAkngEAYEg8AwDAkHgGAIAh8QwAAEPiGQAAhsQzAAAMiWcAABg66y6S4iIiAACsipVnAAAYEs8AADAkngEAYEg8AwDAkHgGAIAh8QwAAEPiGQAAhsQzAAAMiWcAABgSzwAAMCSeAQBgSDwDAMCQeAYAgCHxDAAAQ+IZAACGxDMAAAyJZwAAGBLPAAAwJJ4BAGBIPAMAwJB4BgCAIfEMAABD4hkAAIbEMwAADIlnAAAYEs8AADAkngEAYEg8AwDAkHgGAIChTeO5qi6vqk9U1aNV9UhVvXcZ/4Wq+ouqenD5unbdc95XVceq6otV9WM7+Q8AAIDdsm9wzLNJfqa7P1dVL0vyQFXdtzx2a3f/p/UHV9Xrk9yY5PuT/IMk/7Oq/mF3n9zOiQMAwG7bdOW5u5/o7s8tt7+Z5NEkl77AU65P8pHu/lZ3fyXJsSRXbcdkAQBglV7UnueqOpDkDUk+vQy9p6oeqqoPVtXLl7FLkzy27mknskFsV9WhqjpaVUdPPvP0i544AADstnE8V9V3J/m9JD/V3X+V5LYk35PkiiRPJPnl5w7d4Ol9ykD37d19ZXdfecFLL37REwcAgN02iuequjBr4fyb3f37SdLdT3b3ye7+2yS/nm9vzTiR5PJ1T78syePbN2UAAFiNyadtVJI7kjza3b+ybnz/usN+PMnDy+27k9xYVRdV1euSHEzyme2bMgAArMbk0zbelOSdST5fVQ8uYz+X5B1VdUXWtmQcT/KTSdLdj1TVXUm+kLVP6rjFJ20AAHAu2DSeu/tPsvE+5ntf4DnvT/L+LcwLAAD2HFcYBACAIfEMAABD4hkAAIbEMwAADIlnAAAYEs8AADAkngEAYEg8AwDAkHgGAIAh8QwAAEPiGQAAhsQzAAAMiWcAABgSzwAAMCSeAQBgSDwDAMCQeAYAgCHxDAAAQ+IZAACGxDMAAAyJZwAAGBLPAAAwJJ4BAGBIPAMAwJB4BgCAIfEMAABD4hkAAIbEMwAADIlnAAAYEs8AADAkngEAYEg8AwDAkHgGAIAh8QwAAEPiGQAAhsQzAAAMiWcAABgSzwAAMCSeAQBgSDwDAMCQeAYAgCHxDAAAQ+IZAACGxDMAAAyJZwAAGBLPAAAwJJ4BAGBIPAMAwJB4BgCAIfEMAABD4hkAAIbEMwAADIlnAAAYEs8AADAkngEAYEg8AwDAkHgGAIAh8QwAAEPiGQAAhsQzAAAMiWcAABgSzwAAMCSeAQBgSDwDAMCQeAYAgCHxDAAAQ+IZAACGxDMAAAyJZwAAGBLPAAAwJJ4BAGBIPAMAwNCm8VxVl1fVJ6rq0ap6pKreu4y/oqruq6ovLd9fvoxXVX2gqo5V1UNV9cad/kcAAMBumKw8P5vkZ7r7+5JcneSWqnp9ksNJ7u/ug0nuX+4nyduSHFy+DiW5bdtnDQAAK7BpPHf3E939ueX2N5M8muTSJNcnuXM57M4kNyy3r0/y4V7zqSSXVNX+bZ85AADsshe157mqDiR5Q5JPJ3ltdz+RrAV2ktcsh12a5LF1TzuxjAEAwFltHM9V9d1Jfi/JT3X3X73QoRuM9QY/71BVHa2qoyefeXo6DQAAWJlRPFfVhVkL59/s7t9fhp98bjvG8v2pZfxEksvXPf2yJI8//2d29+3dfWV3X3nBSy8+0/kDAMCumXzaRiW5I8mj3f0r6x66O8lNy+2bknxs3fi7lk/duDrJ089t7wAAgLPZvsExb0ryziSfr6oHl7GfS3IkyV1VdXOSryZ5+/LYvUmuTXIsyTNJ3r2tMwYAgBXZNJ67+0+y8T7mJHnrBsd3klu2OC8AANhzXGEQAACGxDMAAAyJZwAAGBLPAAAwJJ4BAGBIPAMAwJB4BgCAIfEMAABD4hkAAIbEMwAADIlnAAAYEs8AADAkngEAYGjfqiewXQ4cvmfD8eNHrtvlmQAAcK6y8gwAAEPiGQAAhsQzAAAMiWcAABgSzwAAMCSeAQBgSDwDAMCQeAYAgCHxDAAAQ+IZAACGzpnLc+9lLh0OAHBusPIMAABDVp5X6HQr0gAA7E1WngEAYEg8AwDAkHgGAIAh8QwAAEPiGQAAhsQzAAAMiWcAABgSzwAAMCSeAQBgSDwDAMCQeAYAgCHxDAAAQ+IZAACGxDMAAAyJZwAAGBLPAAAwJJ4BAGBIPAMAwJB4BgCAIfEMAABD4hkAAIb2rXoCO+3A4XtOGTt+5LoVzAQAgLOdlWcAABgSzwAAMCSeAQBgSDwDAMDQOf+GwZ3ijYgAAOcfK88AADAkngEAYEg8AwDAkHgGAIAh8QwAAEPiGQAAhsQzAAAMiWcAABgSzwAAMCSeAQBgSDwDAMCQeAYAgCHxDAAAQ+IZAACGxDMAAAyJZwAAGNq36gmcSw4cvmfVUwAAYAedl/F8usg9fuS6XZ4JAABnE9s2AABgaNN4rqoPVtVTVfXwurFfqKq/qKoHl69r1z32vqo6VlVfrKof26mJAwDAbpusPH8oyTUbjN/a3VcsX/cmSVW9PsmNSb5/ec6vVdUF2zVZAABYpU3jubv/OMnXhj/v+iQf6e5vdfdXkhxLctUW5gcAAHvGVvY8v6eqHlq2dbx8Gbs0yWPrjjmxjJ2iqg5V1dGqOnrymae3MA0AANgdZxrPtyX5niRXJHkiyS8v47XBsb3RD+ju27v7yu6+8oKXXnyG0wAAgN1zRvHc3U9298nu/tskv55vb804keTydYdeluTxrU0RAAD2hjOK56rav+7ujyd57pM47k5yY1VdVFWvS3IwyWe2NkUAANgbNr1ISlX9dpI3J3lVVZ1I8vNJ3lxVV2RtS8bxJD+ZJN39SFXdleQLSZ5Nckt3n9yZqQMAwO7aNJ67+x0bDN/xAse/P8n7tzIpAADYi1xhEAAAhsQzAAAMbbpt43xy4PA9p4wdP3LdCmYCAMBeZOUZAACGxDMAAAyJZwAAGBLPAAAwJJ4BAGBIPAMAwJB4BgCAIfEMAABD4hkAAIbEMwAADIlnAAAYEs8AADAkngEAYEg8AwDAkHgGAIAh8QwAAEPiGQAAhsQzAAAMiWcAABjat+oJ7HUHDt+z6ikAALBHWHkGAIAh8QwAAEPiGQAAhsQzAAAMecPgWWKjNy4eP3LdCmYCAHD+Es9nsdN9EoioBgDYGbZtAADAkHgGAIAh8QwAAEPiGQAAhsQzAAAMiWcAABgSzwAAMCSeAQBgSDwDAMCQeAYAgCHxDAAAQ+IZAACGxDMAAAyJZwAAGBLPAAAwJJ4BAGBIPAMAwJB4BgCAIfEMAABD4hkAAIbEMwAADIlnAAAYEs8AADAkngEAYEg8AwDAkHgGAIAh8QwAAEPiGQAAhsQzAAAMiWcAABgSzwAAMCSeAQBgaN+qJ8D2O3D4nlPGjh+5bgUzAQA4t1h5BgCAIfEMAABD4hkAAIbEMwAADIlnAAAYEs8AADAkngEAYEg8AwDAkHgGAIAh8QwAAEObxnNVfbCqnqqqh9eNvaKq7quqLy3fX76MV1V9oKqOVdVDVfXGnZw8AADspsnK84eSXPO8scNJ7u/ug0nuX+4nyduSHFy+DiW5bXumCQAAq7dpPHf3Hyf52vOGr09y53L7ziQ3rBv/cK/5VJJLqmr/dk0WAABW6Uz3PL+2u59IkuX7a5bxS5M8tu64E8sYAACc9bb7DYO1wVhveGDVoao6WlVHTz7z9DZPAwAAtt++M3zek1W1v7ufWLZlPLWMn0hy+brjLkvy+EY/oLtvT3J7kly0/+CGgc32OXD4ng3Hjx+5bpdnAgBw9jrTlee7k9y03L4pycfWjb9r+dSNq5M8/dz2DgAAONttuvJcVb+d5M1JXlVVJ5L8fJIjSe6qqpuTfDXJ25fD701ybZJjSZ5J8u4dmDMAAKzEpvHc3e84zUNv3eDYTnLLVicFAAB7kSsMAgDAkHgGAIAh8QwAAEPiGQAAhsQzAAAMiWcAABgSzwAAMCSeAQBgSDwDAMCQeAYAgCHxDAAAQ+IZAACGxDMAAAyJZwAAGBLPAAAwJJ4BAGBIPAMAwJB4BgCAIfEMAABD4hkAAIbEMwAADIlnAAAYEs8AADAkngEAYEg8AwDAkHgGAIAh8QwAAEPiGQAAhsQzAAAMiWcAABgSzwAAMCSeAQBgSDwDAMCQeAYAgCHxDAAAQ+IZAACGxDMAAAyJZwAAGBLPAAAwJJ4BAGBIPAMAwJB4BgCAoX2rngB704HD95wydvzIdSuYCQDA3mHlGQAAhsQzAAAM2bbBnrXR1pHE9hEAYHWsPAMAwJB4BgCAIfEMAABD4hkAAIa8YfA8d7o35QEAcCorzwAAMGTlmS1zNUIA4Hxh5RkAAIbEMwAADNm2wa5y1UAA4Gxm5RkAAIbEMwAADNm2wZjPhAYAzndWngEAYEg8AwDAkHgGAIAh8QwAAEPeMMie4M2IAMDZwMozAAAMiWcAABiybYMdYRsGAHAusvIMAABD4hkAAIbEMwAADIlnAAAYEs8AADAkngEAYGhLH1VXVceTfDPJySTPdveVVfWKJL+T5ECS40n+dXd/fWvTBACA1duOlecf7u4ruvvK5f7hJPd398Ek9y/3AQDgrLcT2zauT3LncvvOJDfswO8AAIBdt9V47iR/VFUPVNWhZey13f1EkizfX7PRE6vqUFUdraqjJ595eovTAACAnbfVy3O/qbsfr6rXJLmvqv58+sTuvj3J7Uly0f6DvcV5AADAjtvSynN3P758fyrJR5NcleTJqtqfJMv3p7Y6SQAA2AvOOJ6r6ruq6mXP3U7yo0keTnJ3kpuWw25K8rGtThIAAPaCrWzbeG2Sj1bVcz/nt7r7D6vqs0nuqqqbk3w1ydu3Pk0AAFi9M47n7v5ykh/cYPz/JHnrViYFAAB7kSsMAgDAkHgGAIAh8QwAAEPiGQAAhsQzAAAMiWcAABgSzwAAMCSeAQBgSDwDAMCQeAYAgCHxDAAAQ+IZAACGxDMAAAyJZwAAGBLPAAAwJJ4BAGBIPAMAwJB4BgCAIfEMAABD4hkAAIbEMwAADIlnAAAY2rfqCcBOOnD4nlPGjh+5bgUzAQDOBVaeAQBgSDwDAMCQeAYAgCHxDAAAQ94wCJvwpkMA4DlWngEAYMjKM2cdK8EAwKpYeQYAgCHxDAAAQ7ZtcE7YaCvHiz3W1g8AYDPiGRYvJsABgPOTbRsAADAkngEAYEg8AwDAkHgGAIAh8QwAAEPiGQAAhsQzAAAMiWcAABgSzwAAMCSeAQBgSDwDAMCQeAYAgCHxDAAAQ+IZAACGxDMAAAyJZwAAGBLPAAAwJJ4BAGBIPAMAwJB4BgCAIfEMAABD4hkAAIbEMwAADIlnAAAY2rfqCcC55MDhe04ZO37kuhXMBADYCVaeAQBgSDwDAMCQbRuwIhtt8Uhs8wCAvczKMwAADFV3r3oOuWj/wd5/06+uehpw1rFKDQAvTlU90N1XnunzrTwDAMCQeAYAgCHxDAAAQ+IZAACGxDMAAAz5nGdgzOXHATjfWXkGAIAhK89wHnOVQwB4caw8AwDA0I6tPFfVNUn+c5ILkvxGdx/Zqd8F5yt7kAFgd+1IPFfVBUn+S5J/keREks9W1d3d/YWd+H3At51uK8Zu/769EPF7eW4AnJ12atvGVUmOdfeXu/v/JvlIkut36HcBAMCuqO7e/h9a9RNJrunuf7vcf2eSH+ru96w75lCSQ8vdH0jy8LZPhLPdq5L85aonwZ7jvGAjzgs24rxgI/+ou192pk/eqT3PtcHY36n07r49ye1JUlVHu/vKHZoLZynnBRtxXrAR5wUbcV6wkao6upXn79S2jRNJLl93/7Ikj+/Q7wIAgF2xU/H82SQHq+p1VfUdSW5McvcO/S4AANgVO7Jto7ufrar3JPkfWfuoug929yMv8JTbd2IenPWcF2zEecFGnBdsxHnBRrZ0XuzIGwYBAOBc5AqDAAAwJJ4BAGBo5fFcVddU1Rer6lhVHV71fFidqjpeVZ+vqgef+xiZqnpFVd1XVV9avr981fNkZ1XVB6vqqap6eN3YhudBrfnA8vrxUFW9cXUzZyed5rz4har6i+U148GqunbdY+9bzosvVtWPrWbW7KSquryqPlFVj1bVI1X13mXc68V57AXOi217vVhpPK+7jPfbkrw+yTuq6vWrnBMr98PdfcW6z+U8nOT+7j6Y5P7lPue2DyW55nljpzsP3pbk4PJ1KMltuzRHdt+Hcup5kSS3Lq8ZV3T3vUmy/HfkxiTfvzzn15b/3nBueTbJz3T39yW5Oskty//2Xi/Ob6c7L5Jter1Y9cqzy3izmeuT3LncvjPJDSucC7ugu/84ydeeN3y68+D6JB/uNZ9KcklV7d+dmbKbTnNenM71ST7S3d/q7q8kOZa1/95wDunuJ7r7c8vtbyZ5NMml8XpxXnuB8+J0XvTrxarj+dIkj627fyIv/A/k3NZJ/qiqHlgu354kr+3uJ5K1/0Mkec3KZscqne488BrCe5Y/wX9w3bYu58V5pqoOJHlDkk/H6wWL550XyTa9Xqw6nje9jDfnlTd19xuz9qe1W6rqn696Qux5XkPOb7cl+Z4kVyR5IskvL+POi/NIVX13kt9L8lPd/VcvdOgGY86Lc9QG58W2vV6sOp5dxpv/r7sfX74/leSjWfuzyZPP/Vlt+f7U6mbICp3uPPAach7r7ie7+2R3/22SX8+3/9TqvDhPVNWFWQuk3+zu31+GvV6c5zY6L7bz9WLV8ewy3iRJquq7quplz91O8qNJHs7a+XDTcthNST62mhmyYqc7D+5O8q7lXfRXJ3n6uT/Xcu573n7VH8/aa0aydl7cWFUXVdXrsvYGsc/s9vzYWVVVSe5I8mh3/8q6h7xenMdOd15s5+vFjlyee+oMLuPNueu1ST66ds5nX5Lf6u4/rKrPJrmrqm5O8tUkb1/hHNkFVfXbSd6c5FVVdSLJzyc5ko3Pg3uTXJu1N3g8k+Tduz5hdsVpzos3V9UVWfsT6/EkP5kk3f1IVd2V5AtZe+f9Ld19chXzZke9Kck7k3y+qh5cxn4uXi/Od6c7L96xXa8XLs8NAABDq962AQAAZw3xDAAAQ+IZAACGxDMAAAyJZwAAGBLPAAAwJJ4BAGDo/wFACOCuMCbQDAAAAABJRU5ErkJggg==\n",
      "text/plain": [
       "<Figure size 864x864 with 1 Axes>"
      ]
     },
     "metadata": {
      "needs_background": "light"
     },
     "output_type": "display_data"
    },
    {
     "data": {
      "image/png": "iVBORw0KGgoAAAANSUhEUgAAAs8AAAKvCAYAAACVhiLtAAAABHNCSVQICAgIfAhkiAAAAAlwSFlzAAALEgAACxIB0t1+/AAAADh0RVh0U29mdHdhcmUAbWF0cGxvdGxpYiB2ZXJzaW9uMy4xLjMsIGh0dHA6Ly9tYXRwbG90bGliLm9yZy+AADFEAAAeIUlEQVR4nO3df6zdd33f8dd7viGUQhN+Rp4d6UbU24BONcxLI0WaUuhKiKs5SDAFTRChTGZSkEBFG4Z/oNKQXGmQDmmNZJqMMLVAxA8lwlnXLIAQf/DDoWlISBEeeMTEisWAAIrKFPPZH/frcRsf577t++Nc24+HdHXP+Zzvufd9xZeTp77+nu+pMUYAAICV/YN5DwAAAOcK8QwAAE3iGQAAmsQzAAA0iWcAAGgSzwAA0NSO56raUlV/XVWfm+5fUVVfrarvVNUnq+pZ0/rF0/3D0+OL6zM6AABsrDM58vyOJI8su//HSW4ZY+xI8uMkN03rNyX58RjjN5PcMm0HAADnvFY8V9X2JLuT/Nl0v5K8Osmnpk3uSHL9dHvPdD/T46+ZtgcAgHPaQnO7P0nyH5I8b7r/wiQ/GWM8Nd0/mmTbdHtbkkeTZIzxVFU9MW3/w+U/sKr2JtmbJHXRs//ZRS/cfsov/afbLmn/IQAAsJL777//h2OMF5/t81eM56r6gyTHxxj3V9U1J5dnbDoaj/1qYYwDSQ4kycVbd4ytN/7JKU86tH/3SuMBAEBbVf3v1Ty/c+T56iT/qqquS/LsJL+RpSPRl1bVwnT0eXuSx6btjya5PMnRqlpIckmSH61mSAAA2AxWPOd5jPGeMcb2McZikhuSfH6M8W+SfCHJG6bNbkxy13T77ul+psc/P8Y45cgzAACca1Zzned3J/nDqjqcpXOab5vWb0vywmn9D5PsW92IAACwOXTfMJgkGWN8MckXp9vfTXLljG3+Lskb12A2AADYVHzCIAAANIlnAABoEs8AANAkngEAoEk8AwBAk3gGAIAm8QwAAE3iGQAAmsQzAAA0iWcAAGgSzwAA0CSeAQCgSTwDAECTeAYAgCbxDAAATeIZAACaxDMAADSJZwAAaBLPAADQJJ4BAKBJPAMAQJN4BgCAJvEMAABN4hkAAJrEMwAANIlnAABoEs8AANAkngEAoEk8AwBAk3gGAIAm8QwAAE3iGQAAmsQzAAA0iWcAAGgSzwAA0CSeAQCgSTwDAECTeAYAgCbxDAAATeIZAACaxDMAADSJZwAAaBLPAADQJJ4BAKBJPAMAQJN4BgCAJvEMAABN4hkAAJrEMwAANIlnAABoEs8AANAkngEAoEk8AwBAk3gGAIAm8QwAAE3iGQAAmsQzAAA0iWcAAGgSzwAA0CSeAQCgSTwDAECTeAYAgCbxDAAATeIZAACaxDMAADSJZwAAaBLPAADQJJ4BAKBJPAMAQJN4BgCAJvEMAABN4hkAAJrEMwAANK0Yz1X17Kr6WlX9TVU9XFV/NK1/tKq+V1UPTF87p/Wqqg9X1eGqerCqXrXefwQAAGyEhcY2v0jy6jHGz6vqoiRfrqr/Pj3278cYn3ra9q9LsmP6+p0kt07fAQDgnLbikeex5OfT3Yumr/EMT9mT5GPT876S5NKq2rr6UQEAYL5a5zxX1ZaqeiDJ8ST3jjG+Oj30genUjFuq6uJpbVuSR5c9/ei09vSfubeqDlXVoRNPPrGKPwEAADZGK57HGCfGGDuTbE9yZVX9VpL3JPknSf55khckefe0ec36ETN+5oExxq4xxq4tz7nkrIYHAICNdEZX2xhj/CTJF5NcO8Y4Np2a8Ysk/zXJldNmR5Ncvuxp25M8tgazAgDAXHWutvHiqrp0uv1rSX4vyd+ePI+5qirJ9Ukemp5yd5K3TFfduCrJE2OMY+syPQAAbKDO1Ta2JrmjqrZkKbbvHGN8rqo+X1UvztJpGg8k+XfT9vckuS7J4SRPJnnr2o8NAAAbb8V4HmM8mOSVM9ZffZrtR5KbVz8aAABsLj5hEAAAmsQzAAA0iWcAAGgSzwAA0CSeAQCgSTwDAECTeAYAgCbxDAAATeIZAACaxDMAADSJZwAAaBLPAADQJJ4BAKBJPAMAQJN4BgCAJvEMAABN4hkAAJrEMwAANIlnAABoEs8AANAkngEAoEk8AwBAk3gGAIAm8QwAAE3iGQAAmsQzAAA0iWcAAGgSzwAA0CSeAQCgSTwDAECTeAYAgCbxDAAATeIZAACaxDMAADSJZwAAaBLPAADQJJ4BAKBJPAMAQNPCvAd4Jov7Dp6ydmT/7jlMAgAAjjwDAECbeAYAgCbxDAAATeIZAACaxDMAADSJZwAAaBLPAADQJJ4BAKBJPAMAQJN4BgCAJvEMAABN4hkAAJrEMwAANIlnAABoEs8AANAkngEAoEk8AwBAk3gGAIAm8QwAAE3iGQAAmsQzAAA0iWcAAGgSzwAA0CSeAQCgSTwDAECTeAYAgCbxDAAATeIZAACaxDMAADSJZwAAaBLPAADQJJ4BAKBJPAMAQNOK8VxVz66qr1XV31TVw1X1R9P6FVX11ar6TlV9sqqeNa1fPN0/PD2+uL5/AgAAbIzOkedfJHn1GOO3k+xMcm1VXZXkj5PcMsbYkeTHSW6atr8pyY/HGL+Z5JZpOwAAOOetGM9jyc+nuxdNXyPJq5N8alq/I8n10+090/1Mj7+mqmrNJgYAgDlpnfNcVVuq6oEkx5Pcm+R/JfnJGOOpaZOjSbZNt7cleTRJpsefSPLCtRwaAADmoRXPY4wTY4ydSbYnuTLJy2ZtNn2fdZR5PH2hqvZW1aGqOnTiySe68wIAwNyc0dU2xhg/SfLFJFclubSqFqaHtid5bLp9NMnlSTI9fkmSH834WQfGGLvGGLu2POeSs5seAAA2UOdqGy+uqkun27+W5PeSPJLkC0neMG12Y5K7ptt3T/czPf75McYpR54BAOBcs7DyJtma5I6q2pKl2L5zjPG5qvpWkk9U1X9M8tdJbpu2vy3Jf6uqw1k64nzDOswNAAAbbsV4HmM8mOSVM9a/m6Xzn5++/ndJ3rgm0wEAwCbiEwYBAKBJPAMAQJN4BgCAJvEMAABN4hkAAJrEMwAANIlnAABoEs8AANAkngEAoEk8AwBAk3gGAIAm8QwAAE3iGQAAmsQzAAA0iWcAAGgSzwAA0CSeAQCgSTwDAECTeAYAgCbxDAAATeIZAACaxDMAADQtzHuAM7W47+DM9SP7d2/wJAAAXGgceQYAgCbxDAAATeIZAACaxDMAADSJZwAAaBLPAADQJJ4BAKBJPAMAQJN4BgCAJvEMAABN4hkAAJrEMwAANIlnAABoEs8AANAkngEAoEk8AwBAk3gGAIAm8QwAAE3iGQAAmsQzAAA0iWcAAGgSzwAA0CSeAQCgSTwDAECTeAYAgCbxDAAATeIZAACaxDMAADSJZwAAaBLPAADQJJ4BAKBJPAMAQJN4BgCAJvEMAABN4hkAAJrEMwAANIlnAABoWpj3APx9i/sOzlw/sn/3Bk8CAMDTOfIMAABN4hkAAJrEMwAANIlnAABoEs8AANAkngEAoEk8AwBAk3gGAIAm8QwAAE3iGQAAmsQzAAA0iWcAAGhaMZ6r6vKq+kJVPVJVD1fVO6b191fVD6rqgenrumXPeU9VHa6qb1fVa9fzDwAAgI2y0NjmqSTvGmN8o6qel+T+qrp3euyWMcZ/Wr5xVb08yQ1JXpHkHyb5n1X1j8YYJ9ZycAAA2GgrHnkeYxwbY3xjuv2zJI8k2fYMT9mT5BNjjF+MMb6X5HCSK9diWAAAmKczOue5qhaTvDLJV6elt1fVg1V1e1U9f1rbluTRZU87mhmxXVV7q+pQVR068eQTZzw4AABstHY8V9Vzk3w6yTvHGD9NcmuSlybZmeRYkg+e3HTG08cpC2McGGPsGmPs2vKcS854cAAA2GiteK6qi7IUzn8+xvhMkowxHh9jnBhj/DLJR/KrUzOOJrl82dO3J3ls7UYGAID56Fxto5LcluSRMcaHlq1vXbbZ65M8NN2+O8kNVXVxVV2RZEeSr63dyAAAMB+dq21cneTNSb5ZVQ9Ma+9N8qaq2pmlUzKOJHlbkowxHq6qO5N8K0tX6rjZlTYAADgfrBjPY4wvZ/Z5zPc8w3M+kOQDq5gLAAA2HZ8wCAAATeIZAACaxDMAADSJZwAAaBLPAADQJJ4BAKBJPAMAQJN4BgCAJvEMAABN4hkAAJrEMwAANIlnAABoEs8AANAkngEAoEk8AwBAk3gGAIAm8QwAAE3iGQAAmsQzAAA0iWcAAGgSzwAA0CSeAQCgSTwDAECTeAYAgCbxDAAATeIZAACaxDMAADSJZwAAaBLPAADQJJ4BAKBJPAMAQJN4BgCAJvEMAABN4hkAAJrEMwAANIlnAABoEs8AANAkngEAoEk8AwBAk3gGAIAm8QwAAE3iGQAAmsQzAAA0iWcAAGgSzwAA0CSeAQCgSTwDAECTeAYAgCbxDAAATeIZAACaxDMAADSJZwAAaBLPAADQJJ4BAKBpYd4DrJXFfQdnrh/Zv3uDJwEA4HzlyDMAADSJZwAAaBLPAADQJJ4BAKBJPAMAQJN4BgCAJvEMAABN4hkAAJrEMwAANIlnAABoEs8AANC0MO8B1tvivoOnrB3Zv3sOkwAAcK5z5BkAAJrEMwAANIlnAABoEs8AANAkngEAoGnFeK6qy6vqC1X1SFU9XFXvmNZfUFX3VtV3pu/Pn9arqj5cVYer6sGqetV6/xEAALAROkeen0ryrjHGy5JcleTmqnp5kn1J7htj7Ehy33Q/SV6XZMf0tTfJrWs+NQAAzMGK8TzGODbG+MZ0+2dJHkmyLcmeJHdMm92R5Prp9p4kHxtLvpLk0qrauuaTAwDABjujc56rajHJK5N8NcllY4xjyVJgJ3nJtNm2JI8ue9rRaQ0AAM5p7Xiuqucm+XSSd44xfvpMm85YGzN+3t6qOlRVh048+UR3DAAAmJvWx3NX1UVZCuc/H2N8Zlp+vKq2jjGOTadlHJ/Wjya5fNnTtyd57Ok/c4xxIMmBJLl4645T4no9zfrI7sTHdgMA8Mw6V9uoJLcleWSM8aFlD92d5Mbp9o1J7lq2/pbpqhtXJXni5OkdAABwLusceb46yZuTfLOqHpjW3ptkf5I7q+qmJN9P8sbpsXuSXJfkcJInk7x1TScGAIA5WTGexxhfzuzzmJPkNTO2H0luXuVcAACw6fiEQQAAaBLPAADQJJ4BAKBJPAMAQJN4BgCAJvEMAABN4hkAAJrEMwAANIlnAABo6nw89wVjcd/BU9aO7N89h0kAANiMHHkGAIAm8QwAAE3iGQAAmsQzAAA0iWcAAGgSzwAA0CSeAQCgSTwDAECTeAYAgCafMHiWfBohAMCFx5FnAABoEs8AANAkngEAoEk8AwBAk3gGAIAm8QwAAE3iGQAAmlzneQ3NuvZz4vrPAADnC0eeAQCgyZHnOTrdkWoAADYnR54BAKBJPAMAQJN4BgCAJvEMAABN4hkAAJpcbWMDuKoGAMD5wZFnAABoEs8AANAkngEAoEk8AwBAk3gGAIAm8QwAAE3iGQAAmsQzAAA0iWcAAGgSzwAA0CSeAQCgSTwDAECTeAYAgCbxDAAATeIZAACaxDMAADSJZwAAaBLPAADQJJ4BAKBJPAMAQJN4BgCAJvEMAABN4hkAAJrEMwAANIlnAABoEs8AANC0MO8BNrvFfQfnPQIAAJuEI88AANAkngEAoEk8AwBAk3gGAIAm8QwAAE3iGQAAmsQzAAA0iWcAAGgSzwAA0CSeAQCgacV4rqrbq+p4VT20bO39VfWDqnpg+rpu2WPvqarDVfXtqnrteg0OAAAbrXPk+aNJrp2xfssYY+f0dU+SVNXLk9yQ5BXTc/60qras1bAAADBPK8bzGONLSX7U/Hl7knxijPGLMcb3khxOcuUq5gMAgE1jYRXPfXtVvSXJoSTvGmP8OMm2JF9Zts3Rae0UVbU3yd4k2fIbL17FGBeuxX0HZ64f2b97gycBALgwnO0bBm9N8tIkO5McS/LBab1mbDtm/YAxxoExxq4xxq4tz7nkLMcAAICNc1bxPMZ4fIxxYozxyyQfya9OzTia5PJlm25P8tjqRgQAgM3hrOK5qrYuu/v6JCevxHF3khuq6uKquiLJjiRfW92IAACwOax4znNVfTzJNUleVFVHk7wvyTVVtTNLp2QcSfK2JBljPFxVdyb5VpKnktw8xjixPqMDAMDGWjGexxhvmrF82zNs/4EkH1jNUAAAsBn5hEEAAGgSzwAA0CSeAQCgSTwDAECTeAYAgCbxDAAATeIZAACaxDMAADSJZwAAaBLPAADQJJ4BAKBJPAMAQNPCvAegZ3HfwXmPAABwwXPkGQAAmsQzAAA0iWcAAGgSzwAA0CSeAQCgSTwDAECTeAYAgCbxDAAATeIZAACaxDMAADSJZwAAaBLPAADQJJ4BAKBJPAMAQJN4BgCAJvEMAABN4hkAAJrEMwAANIlnAABoEs8AANAkngEAoEk8AwBAk3gGAIAm8QwAAE3iGQAAmsQzAAA0iWcAAGhamPcArL3FfQdPWTuyf/ccJgEAOL848gwAAE3iGQAAmsQzAAA0iWcAAGgSzwAA0CSeAQCgSTwDAECTeAYAgCbxDAAATeIZAACaxDMAADSJZwAAaBLPAADQJJ4BAKBJPAMAQJN4BgCAJvEMAABN4hkAAJoW5j0AG2Nx38GZ60f2797gSQAAzl2OPAMAQJN4BgCAJvEMAABN4hkAAJrEMwAANIlnAABoEs8AANAkngEAoEk8AwBAk3gGAIAm8QwAAE3iGQAAmlaM56q6vaqOV9VDy9ZeUFX3VtV3pu/Pn9arqj5cVYer6sGqetV6Dg8AABupc+T5o0mufdraviT3jTF2JLlvup8kr0uyY/ram+TWtRkTAADmb8V4HmN8KcmPnra8J8kd0+07kly/bP1jY8lXklxaVVvXalgAAJinsz3n+bIxxrEkmb6/ZFrfluTRZdsdndYAAOCct9ZvGKwZa2PmhlV7q+pQVR068eQTazwGAACsvbON58dPno4xfT8+rR9Ncvmy7bYneWzWDxhjHBhj7Bpj7NrynEvOcgwAANg4ZxvPdye5cbp9Y5K7lq2/ZbrqxlVJnjh5egcAAJzrFlbaoKo+nuSaJC+qqqNJ3pdkf5I7q+qmJN9P8sZp83uSXJfkcJInk7x1HWYGAIC5WDGexxhvOs1Dr5mx7Uhy82qHAgCAzcgnDAIAQJN4BgCAJvEMAABN4hkAAJrEMwAANIlnAABoEs8AANAkngEAoEk8AwBAk3gGAIAm8QwAAE3iGQAAmsQzAAA0Lcx7AOZrcd/BmetH9u/e4EkAADY/R54BAKBJPAMAQJN4BgCAJvEMAABN4hkAAJrEMwAANIlnAABoEs8AANAkngEAoEk8AwBAk3gGAIAm8QwAAE3iGQAAmsQzAAA0iWcAAGgSzwAA0CSeAQCgaWHeA3DuWNx3cOb6kf27N3gSAID5cOQZAACaxDMAADSJZwAAaBLPAADQJJ4BAKBJPAMAQJN4BgCAJvEMAABN4hkAAJrEMwAANIlnAABoEs8AANAkngEAoEk8AwBAk3gGAIAm8QwAAE3iGQAAmsQzAAA0iWcAAGgSzwAA0CSeAQCgaWHeA7A5Le47OO8RAAA2HUeeAQCgSTwDAECTeAYAgCbnPLNqs86PPrJ/9xwmAQBYX448AwBAk3gGAIAm8QwAAE3iGQAAmsQzAAA0iWcAAGgSzwAA0CSeAQCgSTwDAECTeAYAgCbxDAAATeIZAACaxDMAADSJZwAAaBLPAADQtLCaJ1fVkSQ/S3IiyVNjjF1V9YIkn0yymORIkn89xvjx6sYEAID5W4sjz787xtg5xtg13d+X5L4xxo4k9033AQDgnLeqI8+nsSfJNdPtO5J8Mcm71+H3sIkt7js4c/3I/t0bPAkAwNpZ7ZHnkeSvqur+qto7rV02xjiWJNP3l8x6YlXtrapDVXXoxJNPrHIMAABYf6s98nz1GOOxqnpJknur6m+7TxxjHEhyIEku3rpjrHIOAABYd6s68jzGeGz6fjzJZ5NcmeTxqtqaJNP346sdEgAANoOzjueq+vWqet7J20l+P8lDSe5OcuO02Y1J7lrtkAAAsBms5rSNy5J8tqpO/py/GGP8ZVV9PcmdVXVTku8neePqx+R84Y2EAMC57KzjeYzx3SS/PWP9/yR5zWqGAgCAzcgnDAIAQNN6XOcZ1oRTPACAzcaRZwAAaBLPAADQJJ4BAKBJPAMAQJN4BgCAJvEMAABN4hkAAJrEMwAANIlnAABoEs8AANAkngEAoEk8AwBAk3gGAIAm8QwAAE3iGQAAmsQzAAA0iWcAAGgSzwAA0CSeAQCgSTwDAEDTwrwHgCRZ3Hdw3iMAAKzIkWcAAGgSzwAA0CSeAQCgSTwDAECTeAYAgCbxDAAATeIZAACaxDMAADSJZwAAaBLPAADQJJ4BAKBJPAMAQJN4BgCAJvEMAABN4hkAAJrEMwAANIlnAABoEs8AANAkngEAoEk8AwBA08K8B4Aztbjv4ClrR/bvnsMkAMCFxpFnAABocuSZ88Kso9GJI9IAwNpy5BkAAJrEMwAANDltg/OaNxcCAGvJkWcAAGgSzwAA0CSeAQCgSTwDAECTeAYAgCbxDAAATeIZAACaxDMAADSJZwAAaBLPAADQJJ4BAKBJPAMAQJN4BgCAJvEMAABNC/MeADba4r6DM9eP7N/d3v502wIA5zdHngEAoEk8AwBAk3gGAIAm8QwAAE3eMAiT072READgJPEMZ+FMr9gBAJwfnLYBAABNjjzDGtroa0Kfye9zvWoAWD1HngEAoGndjjxX1bVJ/nOSLUn+bIyxf71+F2xma/GJhgDA5rAu8VxVW5L8lyT/MsnRJF+vqrvHGN9aj98H56LNEMnr+cbHM/n7nD4CwLlivU7buDLJ4THGd8cY/zfJJ5LsWaffBQAAG6LGGGv/Q6vekOTaMca/ne6/OcnvjDHevmybvUn2Tnd/K8lDaz4I57oXJfnhvIdg07FfMIv9glnsF8zyj8cYzzvbJ6/XOc81Y+3vVfoY40CSA0lSVYfGGLvWaRbOUfYLZrFfMIv9glnsF8xSVYdW8/z1Om3jaJLLl93fnuSxdfpdAACwIdYrnr+eZEdVXVFVz0pyQ5K71+l3AQDAhliX0zbGGE9V1duT/I8sXaru9jHGw8/wlAPrMQfnPPsFs9gvmMV+wSz2C2ZZ1X6xLm8YBACA85FPGAQAgCbxDAAATXOP56q6tqq+XVWHq2rfvOdhfqrqSFV9s6oeOHkZmap6QVXdW1Xfmb4/f95zsr6q6vaqOl5VDy1bm7kf1JIPT68fD1bVq+Y3OevpNPvF+6vqB9NrxgNVdd2yx94z7RffrqrXzmdq1lNVXV5VX6iqR6rq4ap6x7Tu9eIC9gz7xZq9Xsw1npd9jPfrkrw8yZuq6uXznIm5+90xxs5l1+Xcl+S+McaOJPdN9zm/fTTJtU9bO91+8LokO6avvUlu3aAZ2Xgfzan7RZLcMr1m7Bxj3JMk039Hbkjyiuk5fzr994bzy1NJ3jXGeFmSq5LcPP1v7/Xiwna6/SJZo9eLeR959jHerGRPkjum23ckuX6Os7ABxhhfSvKjpy2fbj/Yk+RjY8lXklxaVVs3ZlI20mn2i9PZk+QTY4xfjDG+l+Rwlv57w3lkjHFsjPGN6fbPkjySZFu8XlzQnmG/OJ0zfr2YdzxvS/LosvtH88x/IOe3keSvqur+6ePbk+SyMcaxZOn/EEleMrfpmKfT7QdeQ3j79E/wty87rct+cYGpqsUkr0zy1Xi9YPK0/SJZo9eLecfzih/jzQXl6jHGq7L0T2s3V9W/mPdAbHpeQy5styZ5aZKdSY4l+eC0br+4gFTVc5N8Osk7xxg/faZNZ6zZL85TM/aLNXu9mHc8+xhv/r8xxmPT9+NJPpulfzZ5/OQ/q03fj89vQubodPuB15AL2Bjj8THGiTHGL5N8JL/6p1b7xQWiqi7KUiD9+RjjM9Oy14sL3Kz9Yi1fL+Ydzz7GmyRJVf16VT3v5O0kv5/koSztDzdOm92Y5K75TMicnW4/uDvJW6Z30V+V5ImT/1zL+e9p56u+PkuvGcnSfnFDVV1cVVdk6Q1iX9vo+VhfVVVJbkvyyBjjQ8se8npxATvdfrGWrxfr8vHcXWfxMd6cvy5L8tmlfT4LSf5ijPGXVfX1JHdW1U1Jvp/kjXOckQ1QVR9Pck2SF1XV0STvS7I/s/eDe5Jcl6U3eDyZ5K0bPjAb4jT7xTVVtTNL/8R6JMnbkmSM8XBV3ZnkW1l65/3NY4wT85ibdXV1kjcn+WZVPTCtvTdeLy50p9sv3rRWrxc+nhsAAJrmfdoGAACcM8QzAAA0iWcAAGgSzwAA0CSeAQCgSTwDAECTeAYAgKb/Bx352tZ62BCVAAAAAElFTkSuQmCC\n",
      "text/plain": [
       "<Figure size 864x864 with 1 Axes>"
      ]
     },
     "metadata": {
      "needs_background": "light"
     },
     "output_type": "display_data"
    },
    {
     "data": {
      "image/png": "iVBORw0KGgoAAAANSUhEUgAAAs8AAAKvCAYAAACVhiLtAAAABHNCSVQICAgIfAhkiAAAAAlwSFlzAAALEgAACxIB0t1+/AAAADh0RVh0U29mdHdhcmUAbWF0cGxvdGxpYiB2ZXJzaW9uMy4xLjMsIGh0dHA6Ly9tYXRwbG90bGliLm9yZy+AADFEAAAd+ElEQVR4nO3dfawl913f8c+3XuMQSO08y7UtbQTblkCFk26DpUhVSCg43qoOEqkcVYkVuVoqOVIQtGXDP4DUSIsEmEYqkQxO41SQYAFRLOxSUicRQmoe1sE4dkyabbKNF1uxaBITZJHKy7d/3DHc2md9v977cPbh9ZKuzpnfmTn3t8rk+K25c2aquwMAAGzt76x7AgAAcK4QzwAAMCSeAQBgSDwDAMCQeAYAgCHxDAAAQ+N4rqqLquqPq+r3luVXVNWnquqLVfVbVfVty/gly/Lx5fX9uzN1AADYW8/lyPM7kzy0afkXktzS3QeSfD3JTcv4TUm+3t3fneSWZT0AADjnjeK5qq5McijJry/LleT1SX57WeX2JG9anl+/LGd5/Q3L+gAAcE7bN1zvV5L8+yQvWJZfnOQb3f3ksnwyyRXL8yuSPJwk3f1kVT2+rP/nm9+wqg4nOZwkdfHz/vHFL77yGb/0H11x6fgfAgAAW7n33nv/vLtfeqbbbxnPVfXPkzzW3fdW1eueGl6xag9e+9uB7luT3Jokl1x+oC+/8VeesdGxo4e2mh4AAIxV1f/ezvaTI8+vTfIvquq6JM9L8nezcST6sqratxx9vjLJI8v6J5NcleRkVe1LcmmSr21nkgAAcDbY8pzn7n5Xd1/Z3fuT3JDkY939r5J8PMmPLavdmOQjy/M7l+Usr3+su59x5BkAAM4127nO808n+cmqOp6Nc5pvW8ZvS/LiZfwnkxzZ3hQBAODsMP3CYJKkuz+R5BPL8y8lec2Kdf4qyZt3YG4AAHBWcYdBAAAYEs8AADAkngEAYEg8AwDAkHgGAIAh8QwAAEPiGQAAhsQzAAAMiWcAABgSzwAAMCSeAQBgSDwDAMCQeAYAgCHxDAAAQ+IZAACGxDMAAAyJZwAAGBLPAAAwJJ4BAGBIPAMAwJB4BgCAIfEMAABD4hkAAIbEMwAADIlnAAAYEs8AADAkngEAYEg8AwDAkHgGAIAh8QwAAEPiGQAAhsQzAAAMiWcAABgSzwAAMCSeAQBgSDwDAMCQeAYAgCHxDAAAQ+IZAACGxDMAAAyJZwAAGBLPAAAwJJ4BAGBIPAMAwJB4BgCAIfEMAABD4hkAAIbEMwAADIlnAAAYEs8AADAkngEAYEg8AwDAkHgGAIAh8QwAAEPiGQAAhsQzAAAMiWcAABgSzwAAMCSeAQBgSDwDAMCQeAYAgCHxDAAAQ+IZAACGxDMAAAyJZwAAGBLPAAAwJJ4BAGBIPAMAwJB4BgCAIfEMAABD4hkAAIbEMwAADIlnAAAY2jKeq+p5VfXpqvqTqnqwqn5+GX9/VX25qu5bfq5exquq3lNVx6vq/qp69W7/IwAAYC/sG6zzrSSv7+6/rKqLk/xRVf3X5bV/192//bT135jkwPLzA0neuzwCAMA5bcsjz73hL5fFi5effpZNrk/ygWW7Tya5rKou3/5UAQBgvUbnPFfVRVV1X5LHkny0uz+1vPTu5dSMW6rqkmXsiiQPb9r85DL29Pc8XFXHqurYqSce38Y/AQAA9sYonrv7VHdfneTKJK+pqu9L8q4k/zDJP0nyoiQ/vaxeq95ixXve2t0Hu/vgRc+/9IwmDwAAe2lyzvPf6O5vVNUnklzb3b+4DH+rqv5zkn+7LJ9MctWmza5M8siZTG7/kbueMXbi6KEzeSsAANi2ydU2XlpVly3Pvz3JDyX506fOY66qSvKmJA8sm9yZ5G3LVTeuSfJ4dz+6K7MHAIA9NDnyfHmS26vqomzE9h3d/XtV9bGqemk2TtO4L8m/Wda/O8l1SY4neSLJ23d+2gAAsPe2jOfuvj/Jq1aMv/4063eSm7c/NQAAOLu4wyAAAAyJZwAAGBLPAAAwJJ4BAGBIPAMAwJB4BgCAIfEMAABD4hkAAIbEMwAADIlnAAAYEs8AADAkngEAYEg8AwDAkHgGAIAh8QwAAEPiGQAAhsQzAAAMiWcAABgSzwAAMCSeAQBgSDwDAMCQeAYAgCHxDAAAQ+IZAACGxDMAAAyJZwAAGBLPAAAwJJ4BAGBIPAMAwJB4BgCAIfEMAABD4hkAAIbEMwAADIlnAAAYEs8AADAkngEAYEg8AwDAkHgGAIAh8QwAAEPiGQAAhsQzAAAMiWcAABgSzwAAMCSeAQBgSDwDAMCQeAYAgCHxDAAAQ+IZAACGxDMAAAyJZwAAGBLPAAAwJJ4BAGBIPAMAwJB4BgCAIfEMAABD4hkAAIbEMwAADIlnAAAYEs8AADAkngEAYEg8AwDAkHgGAIAh8QwAAEPiGQAAhsQzAAAMiWcAABgSzwAAMCSeAQBgSDwDAMCQeAYAgCHxDAAAQ+IZAACGtoznqnpeVX26qv6kqh6sqp9fxl9RVZ+qqi9W1W9V1bct45csy8eX1/fv7j8BAAD2xuTI87eSvL67vz/J1UmuraprkvxCklu6+0CSrye5aVn/piRf7+7vTnLLsh4AAJzztozn3vCXy+LFy08neX2S317Gb0/ypuX59ctyltffUFW1YzMGAIA1GZ3zXFUXVdV9SR5L8tEk/yvJN7r7yWWVk0muWJ5fkeThJFlefzzJi3dy0gAAsA6jeO7uU919dZIrk7wmyfesWm15XHWUuZ8+UFWHq+pYVR079cTj0/kCAMDaPKerbXT3N5J8Isk1SS6rqn3LS1cmeWR5fjLJVUmyvH5pkq+teK9bu/tgdx+86PmXntnsAQBgD02utvHSqrpsef7tSX4oyUNJPp7kx5bVbkzykeX5nctyltc/1t3POPIMAADnmn1br5LLk9xeVRdlI7bv6O7fq6rPJ/lQVf2HJH+c5LZl/duS/JeqOp6NI8437MK8AQBgz20Zz919f5JXrRj/UjbOf376+F8lefOOzA4AAM4i7jAIAABD4hkAAIbEMwAADIlnAAAYEs8AADAkngEAYEg8AwDAkHgGAIAh8QwAAEPiGQAAhsQzAAAMiWcAABgSzwAAMCSeAQBgSDwDAMCQeAYAgCHxDAAAQ+IZAACGxDMAAAyJZwAAGBLPAAAwJJ4BAGBIPAMAwJB4BgCAIfEMAABD4hkAAIbEMwAADIlnAAAYEs8AADAkngEAYEg8AwDAkHgGAIAh8QwAAEPiGQAAhsQzAAAMiWcAABgSzwAAMCSeAQBgSDwDAMCQeAYAgCHxDAAAQ+IZAACGxDMAAAyJZwAAGBLPAAAwJJ4BAGBIPAMAwJB4BgCAIfEMAABD4hkAAIbEMwAADIlnAAAYEs8AADAkngEAYEg8AwDAkHgGAIAh8QwAAEPiGQAAhsQzAAAMiWcAABgSzwAAMCSeAQBgSDwDAMCQeAYAgCHxDAAAQ+IZAACGxDMAAAyJZwAAGBLPAAAwJJ4BAGBIPAMAwJB4BgCAIfEMAABDW8ZzVV1VVR+vqoeq6sGqeucy/nNV9WdVdd/yc92mbd5VVcer6gtV9SO7+Q8AAIC9sm+wzpNJfqq7P1tVL0hyb1V9dHntlu7+xc0rV9Urk9yQ5HuT/L0k/72q/n53n9rJiQMAwF7b8shzdz/a3Z9dnn8zyUNJrniWTa5P8qHu/lZ3fznJ8SSv2YnJAgDAOj2nc56ran+SVyX51DL0jqq6v6reV1UvXMauSPLwps1OZkVsV9XhqjpWVcdOPfH4c544AADstXE8V9V3JvmdJD/R3X+R5L1JvivJ1UkeTfJLT626YvN+xkD3rd19sLsPXvT8S5/zxAEAYK+N4rmqLs5GOP9Gd/9uknT3V7v7VHf/dZJfy9+emnEyyVWbNr8yySM7N2UAAFiPydU2KsltSR7q7l/eNH75ptV+NMkDy/M7k9xQVZdU1SuSHEjy6Z2bMgAArMfkahuvTfLWJJ+rqvuWsZ9J8paqujobp2ScSPLjSdLdD1bVHUk+n40rddzsShsAAJwPtozn7v6jrD6P+e5n2ebdSd69jXkBAMBZxx0GAQBgSDwDAMCQeAYAgCHxDAAAQ+IZAACGxDMAAAyJZwAAGBLPAAAwJJ4BAGBIPAMAwJB4BgCAIfEMAABD4hkAAIbEMwAADIlnAAAYEs8AADAkngEAYGjfuifwXO0/ctfK8RNHD+3xTAAAuNA48gwAAEPiGQAAhs650zbOd05LAQA4eznyDAAAQ+IZAACGxDMAAAyJZwAAGBLPAAAwJJ4BAGBIPAMAwJB4BgCAIfEMAABD4hkAAIbEMwAADIlnAAAYEs8AADAkngEAYEg8AwDAkHgGAIAh8QwAAEPiGQAAhsQzAAAM7Vv3BHbK/iN3rRw/cfTQHs8EAIDzlSPPAAAwJJ4BAGBIPAMAwJB4BgCAIfEMAABD4hkAAIbEMwAADIlnAAAYEs8AADAkngEAYEg8AwDAkHgGAIAh8QwAAEPiGQAAhsQzAAAMiWcAABgSzwAAMCSeAQBgSDwDAMCQeAYAgCHxDAAAQ+IZAACGxDMAAAyJZwAAGBLPAAAwJJ4BAGBIPAMAwJB4BgCAIfEMAABD4hkAAIbEMwAADG0Zz1V1VVV9vKoeqqoHq+qdy/iLquqjVfXF5fGFy3hV1Xuq6nhV3V9Vr97tfwQAAOyFyZHnJ5P8VHd/T5JrktxcVa9MciTJPd19IMk9y3KSvDHJgeXncJL37visAQBgDbaM5+5+tLs/uzz/ZpKHklyR5Pokty+r3Z7kTcvz65N8oDd8MsllVXX5js8cAAD22HM657mq9id5VZJPJXl5dz+abAR2kpctq12R5OFNm51cxgAA4Jw2jueq+s4kv5PkJ7r7L55t1RVjveL9DlfVsao6duqJx6fTAACAtRnFc1VdnI1w/o3u/t1l+KtPnY6xPD62jJ9MctWmza9M8sjT37O7b+3ug9198KLnX3qm8wcAgD0zudpGJbktyUPd/cubXrozyY3L8xuTfGTT+NuWq25ck+Txp07vAACAc9m+wTqvTfLWJJ+rqvuWsZ9JcjTJHVV1U5KvJHnz8trdSa5LcjzJE0nevqMzBgCANdkynrv7j7L6POYkecOK9TvJzducFwAAnHXcYRAAAIbEMwAADIlnAAAYEs8AADAkngEAYEg8AwDAkHgGAIAh8QwAAEPiGQAAhsQzAAAMiWcAABgSzwAAMCSeAQBgSDwDAMCQeAYAgCHxDAAAQ+IZAACGxDMAAAyJZwAAGBLPAAAwJJ4BAGBIPAMAwNC+dU9gt+0/ctczxk4cPbSGmQAAcK5z5BkAAIbO+yPPq6w6Gp04Ig0AwLNz5BkAAIbEMwAADIlnAAAYEs8AADAkngEAYEg8AwDAkHgGAIAh8QwAAEPiGQAAhsQzAAAMXZC35z5bnO424QAAnJ0ceQYAgCHxDAAAQ+IZAACGxDMAAAyJZwAAGBLPAAAwJJ4BAGBIPAMAwJB4BgCAIfEMAABD4hkAAIbEMwAADIlnAAAYEs8AADAkngEAYEg8AwDAkHgGAIAh8QwAAEPiGQAAhvatewLM7D9y1zPGThw9tIaZAABcuBx5BgCAIfEMAABDTtvYwqrTJU7HaRQAAOc3R54BAGBIPAMAwJB4BgCAIec874Hnct40AABnL0eeAQBgSDwDAMCQeAYAgCHxDAAAQ+IZAACGxDMAAAyJZwAAGHKd5x3kes4AAOc3R54BAGBIPAMAwNCW8VxV76uqx6rqgU1jP1dVf1ZV9y0/12167V1VdbyqvlBVP7JbEwcAgL02OfL8/iTXrhi/pbuvXn7uTpKqemWSG5J877LNr1bVRTs1WQAAWKctvzDY3X9YVfuH73d9kg9197eSfLmqjid5TZL/ccYz3EO+8AcAwLPZzjnP76iq+5fTOl64jF2R5OFN65xcxp6hqg5X1bGqOnbqice3MQ0AANgbZxrP703yXUmuTvJokl9axmvFur3qDbr71u4+2N0HL3r+pWc4DQAA2DtnFM/d/dXuPtXdf53k17JxakaycaT5qk2rXpnkke1NEQAAzg5nFM9VdfmmxR9N8tSVOO5MckNVXVJVr0hyIMmntzdFAAA4O2z5hcGq+mCS1yV5SVWdTPKzSV5XVVdn45SME0l+PEm6+8GquiPJ55M8meTm7j61O1MHAIC9NbnaxltWDN/2LOu/O8m7tzMpAAA4G7nDIAAADIlnAAAYEs8AADAkngEAYEg8AwDAkHgGAIAh8QwAAEPiGQAAhsQzAAAMiWcAABgSzwAAMCSeAQBgSDwDAMCQeAYAgCHxDAAAQ+IZAACGxDMAAAyJZwAAGBLPAAAwJJ4BAGBIPAMAwJB4BgCAIfEMAABD4hkAAIbEMwAADIlnAAAYEs8AADAkngEAYEg8AwDAkHgGAIAh8QwAAEPiGQAAhsQzAAAMiWcAABgSzwAAMLRv3RPgzO0/ctfK8RNHD+3xTAAALgyOPAMAwJB4BgCAIfEMAABD4hkAAIbEMwAADIlnAAAYEs8AADAkngEAYEg8AwDAkHgGAIAh8QwAAEPiGQAAhsQzAAAMiWcAABgSzwAAMCSeAQBgSDwDAMCQeAYAgCHxDAAAQ+IZAACGxDMAAAyJZwAAGBLPAAAwJJ4BAGBIPAMAwJB4BgCAIfEMAABD4hkAAIbEMwAADIlnAAAYEs8AADAkngEAYEg8AwDAkHgGAIAh8QwAAEP71j0Bdt7+I3c9Y+zE0UNrmAkAwPllyyPPVfW+qnqsqh7YNPaiqvpoVX1xeXzhMl5V9Z6qOl5V91fVq3dz8gAAsJcmp228P8m1Txs7kuSe7j6Q5J5lOUnemOTA8nM4yXt3ZpoAALB+W8Zzd/9hkq89bfj6JLcvz29P8qZN4x/oDZ9McllVXb5TkwUAgHU60y8Mvry7H02S5fFly/gVSR7etN7JZQwAAM55O321jVox1itXrDpcVceq6tipJx7f4WkAAMDOO9N4/upTp2Msj48t4yeTXLVpvSuTPLLqDbr71u4+2N0HL3r+pWc4DQAA2DtnGs93JrlxeX5jko9sGn/bctWNa5I8/tTpHQAAcK7b8jrPVfXBJK9L8pKqOpnkZ5McTXJHVd2U5CtJ3rysfneS65IcT/JEkrfvwpwBAGAttozn7n7LaV56w4p1O8nN250UAACcjdxh8AKx6q6DiTsPAgA8Fzt9tQ0AADhviWcAABgSzwAAMCSeAQBgyBcGL3C+SAgAMOfIMwAADIlnAAAYEs8AADAkngEAYEg8AwDAkHgGAIAh8QwAAEPiGQAAhsQzAAAMiWcAABgSzwAAMCSeAQBgaN+6J8DZaf+Ru54xduLooTXMBADg7OHIMwAADIlnAAAYEs8AADAkngEAYEg8AwDAkHgGAIAh8QwAAEPiGQAAhsQzAAAMiWcAABhye27GVt2yO3HbbgDgwuHIMwAADIlnAAAYEs8AADAkngEAYEg8AwDAkHgGAIAh8QwAAEPiGQAAhsQzAAAMiWcAABgSzwAAMCSeAQBgSDwDAMCQeAYAgCHxDAAAQ/vWPQHOT/uP3LVy/MTRQ3s8EwCAnePIMwAADIlnAAAYEs8AADAkngEAYEg8AwDAkHgGAIAh8QwAAEPiGQAAhsQzAAAMiWcAABgSzwAAMCSeAQBgSDwDAMCQeAYAgCHxDAAAQ+IZAACGxDMAAAyJZwAAGBLPAAAwtG/dE+Dct//IXXv6vieOHtqV3wcAsBVHngEAYEg8AwDAkHgGAIAh8QwAAEPiGQAAhsQzAAAMiWcAABja1nWeq+pEkm8mOZXkye4+WFUvSvJbSfYnOZHkX3b317c3TQAAWL+dOPL8g919dXcfXJaPJLmnuw8kuWdZBgCAc95unLZxfZLbl+e3J3nTLvwOAADYc9uN507yB1V1b1UdXsZe3t2PJsny+LJVG1bV4ao6VlXHTj3x+DanAQAAu29b5zwneW13P1JVL0vy0ar60+mG3X1rkluT5JLLD/Q25wEAALtuW0eeu/uR5fGxJB9O8pokX62qy5NkeXxsu5MEAICzwRnHc1V9R1W94KnnSX44yQNJ7kxy47LajUk+st1JAgDA2WA7p228PMmHq+qp9/nN7v79qvpMkjuq6qYkX0ny5u1PEwAA1u+M47m7v5Tk+1eM/58kb9jOpDh/7T9y18rxE0cP7fFMAACeO3cYBACAIfEMAABD4hkAAIbEMwAADIlnAAAYEs8AADAkngEAYEg8AwDAkHgGAIAh8QwAAEPiGQAAhsQzAAAMiWcAABgSzwAAMCSeAQBgSDwDAMCQeAYAgCHxDAAAQ+IZAACGxDMAAAyJZwAAGBLPAAAwJJ4BAGBIPAMAwNC+dU8AkmT/kbvWPQUAgC058gwAAEPiGQAAhsQzAAAMiWcAABgSzwAAMCSeAQBgSDwDAMCQeAYAgCE3SeGcs+qGKieOHlrDTACAC40jzwAAMCSeAQBgSDwDAMCQeAYAgCFfGOS8sOpLhIkvEgIAO8uRZwAAGBLPAAAwJJ4BAGBIPAMAwJAvDHJeczdCAGAnOfIMAABD4hkAAIbEMwAADIlnAAAYEs8AADAkngEAYEg8AwDAkHgGAIAh8QwAAEPiGQAAhsQzAAAM7Vv3BGCv7T9y18rxE0cP7fFMAIBzjSPPAAAwJJ4BAGBIPAMAwJB4BgCAIfEMAABD4hkAAIbEMwAADIlnAAAYcpMUWLh5CgCwFUeeAQBgSDwDAMCQeAYAgCHxDAAAQ+IZAACGxDMAAAyJZwAAGBLPAAAwtGs3Samqa5P8xyQXJfn17j66W78L9trpbqiyipusAMD5o7p759+06qIk/zPJP0tyMslnkryluz+/av1LLj/Ql9/4Kzs+DzhfnC7AV0W8WAeA06uqe7v74Jluv1unbbwmyfHu/lJ3/98kH0py/S79LgAA2BO7deT5x5Jc293/ell+a5If6O53bFrncJLDy+L3JXlgxyfCue4lSf583ZPgrGO/YBX7BavYL1jlH3T3C850490657lWjP1/ld7dtya5NUmq6th2Dp9zfrJfsIr9glXsF6xiv2CVqjq2ne1367SNk0mu2rR8ZZJHdul3AQDAntiteP5MkgNV9Yqq+rYkNyS5c5d+FwAA7IldOW2ju5+sqnck+W/ZuFTd+7r7wWfZ5NbdmAfnPPsFq9gvWMV+wSr2C1bZ1n6xK18YBACA85E7DAIAwJB4BgCAobXHc1VdW1VfqKrjVXVk3fNhfarqRFV9rqrue+oyMlX1oqr6aFV9cXl84brnye6qqvdV1WNV9cCmsZX7QW14z/L5cX9VvXp9M2c3nWa/+Lmq+rPlM+O+qrpu02vvWvaLL1TVj6xn1uymqrqqqj5eVQ9V1YNV9c5l3OfFBexZ9osd+7xYazwvt/H+T0nemOSVSd5SVa9c55xYux/s7qs3XZfzSJJ7uvtAknuWZc5v709y7dPGTrcfvDHJgeXncJL37tEc2XvvzzP3iyS5ZfnMuLq7706S5b8jNyT53mWbX13+e8P55ckkP9Xd35PkmiQ3L//b+7y4sJ1uv0h26PNi3Uee3cabrVyf5Pbl+e1J3rTGubAHuvsPk3ztacOn2w+uT/KB3vDJJJdV1eV7M1P20mn2i9O5PsmHuvtb3f3lJMez8d8bziPd/Wh3f3Z5/s0kDyW5Ij4vLmjPsl+cznP+vFh3PF+R5OFNyyfz7P9Azm+d5A+q6t7l9u1J8vLufjTZ+D9EkpetbXas0+n2A58hvGP5E/z7Np3WZb+4wFTV/iSvSvKp+Lxg8bT9Itmhz4t1x/OWt/HmgvLa7n51Nv60dnNV/dN1T4izns+QC9t7k3xXkquTPJrkl5Zx+8UFpKq+M8nvJPmJ7v6LZ1t1xZj94jy1Yr/Ysc+Ldcez23jzN7r7keXxsSQfzsafTb761J/VlsfH1jdD1uh0+4HPkAtYd3+1u091918n+bX87Z9a7RcXiKq6OBuB9Bvd/bvLsM+LC9yq/WInPy/WHc9u402SpKq+o6pe8NTzJD+c5IFs7A83LqvdmOQj65kha3a6/eDOJG9bvkV/TZLHn/pzLee/p52v+qPZ+MxINvaLG6rqkqp6RTa+IPbpvZ4fu6uqKsltSR7q7l/e9JLPiwvY6faLnfy82JXbc0+dwW28OX+9PMmHN/b57Evym939+1X1mSR3VNVNSb6S5M1rnCN7oKo+mOR1SV5SVSeT/GySo1m9H9yd5LpsfMHjiSRv3/MJsydOs1+8rqquzsafWE8k+fEk6e4Hq+qOJJ/Pxjfvb+7uU+uYN7vqtUnemuRzVXXfMvYz8XlxoTvdfvGWnfq8cHtuAAAYWvdpGwAAcM4QzwAAMCSeAQBgSDwDAMCQeAYAgCHxDAAAQ+IZAACG/h+wWMYBBxP2VAAAAABJRU5ErkJggg==\n",
      "text/plain": [
       "<Figure size 864x864 with 1 Axes>"
      ]
     },
     "metadata": {
      "needs_background": "light"
     },
     "output_type": "display_data"
    },
    {
     "data": {
      "image/png": "iVBORw0KGgoAAAANSUhEUgAAAs8AAAKvCAYAAACVhiLtAAAABHNCSVQICAgIfAhkiAAAAAlwSFlzAAALEgAACxIB0t1+/AAAADh0RVh0U29mdHdhcmUAbWF0cGxvdGxpYiB2ZXJzaW9uMy4xLjMsIGh0dHA6Ly9tYXRwbG90bGliLm9yZy+AADFEAAAd90lEQVR4nO3dbaxl51nf4f9dj3EIBDvvdW1LE8G0JVDhpK6xFKkKCQUnruogkcpRlViR26GSo4JALZN8AaRGGqSCIVKJNOA0ThUIFhDFwi7gOokQH/IyDsaxY1CmyTQebMWlSUyQRSpP7n44y82pvcfn9pyXPS/XJR3tvZ+99j7PkZf3/PScddaq7g4AALC1v7PuCQAAwNlCPAMAwJB4BgCAIfEMAABD4hkAAIbEMwAADI3juaouqKo/rarfXx6/oqo+WVWfr6rfrqpvW8YvWh4fW57fvztTBwCAvfVcVp5/MslDmx7/YpJbuvtAkq8muWkZvynJV7v7e5LcsmwHAABnvVE8V9XlSa5L8hvL40ryuiS/s2xyW5I3LfevXx5nef71y/YAAHBW2zfc7leS/IckL1gevzjJ17r7yeXxiSSXLfcvS/JwknT3k1X1+LL9X21+w6o6mORgktSFz/vHF7748md803902cXjHwQAALZy7733/lV3v/R0X79lPFfVP0/yWHffW1WvfWp4xaY9eO5bA91HkhxJkosuPdCX3vgrz3jR0cPXbTU9AAAYq6r/uZ3XT1aeX5PkX1TVG5M8L8l3ZWMl+pKq2resPl+e5JFl+xNJrkhyoqr2Jbk4yVe2M0kAADgTbHnMc3e/s7sv7+79SW5I8tHu/ldJPpbkx5fNbkzykeX+HcvjLM9/tLufsfIMAABnm+2c5/lnk/x0VR3LxjHNty7jtyZ58TL+00kObW+KAABwZpj+wWCSpLs/nuTjy/0vJLl6xTZ/m+TNOzA3AAA4o7jCIAAADIlnAAAYEs8AADAkngEAYEg8AwDAkHgGAIAh8QwAAEPiGQAAhsQzAAAMiWcAABgSzwAAMCSeAQBgSDwDAMCQeAYAgCHxDAAAQ+IZAACGxDMAAAyJZwAAGBLPAAAwJJ4BAGBIPAMAwJB4BgCAIfEMAABD4hkAAIbEMwAADIlnAAAYEs8AADAkngEAYEg8AwDAkHgGAIAh8QwAAEPiGQAAhsQzAAAMiWcAABgSzwAAMCSeAQBgSDwDAMCQeAYAgCHxDAAAQ+IZAACGxDMAAAyJZwAAGBLPAAAwJJ4BAGBIPAMAwJB4BgCAIfEMAABD4hkAAIbEMwAADIlnAAAYEs8AADAkngEAYEg8AwDAkHgGAIAh8QwAAEPiGQAAhsQzAAAMiWcAABgSzwAAMCSeAQBgSDwDAMCQeAYAgCHxDAAAQ+IZAACGxDMAAAyJZwAAGBLPAAAwJJ4BAGBIPAMAwJB4BgCAIfEMAABD4hkAAIbEMwAADG0Zz1X1vKr6VFX9WVU9WFW/sIy/v6q+WFX3LV9XLuNVVe+pqmNVdX9VvXq3fwgAANgL+wbbfCPJ67r7b6rqwiR/UlX/bXnu33f37zxt+zckObB8/WCS9y63AABwVtty5bk3/M3y8MLlq5/lJdcn+cDyuk8kuaSqLt3+VAEAYL1GxzxX1QVVdV+Sx5Lc3d2fXJ5693Joxi1VddEydlmShze9/MQy9vT3PFhVR6vq6MknHt/GjwAAAHtjFM/dfbK7r0xyeZKrq+r7k7wzyT9M8k+SvCjJzy6b16q3WPGeR7r7qu6+6oLnX3xakwcAgL30nM620d1fS/LxJNd296PLoRnfSPJfkly9bHYiyRWbXnZ5kkd2YK4AALBWk7NtvLSqLlnuf3uSH07y508dx1xVleRNSR5YXnJHkrctZ924Jsnj3f3orsweAAD20ORsG5cmua2qLshGbN/e3b9fVR+tqpdm4zCN+5L822X7u5K8McmxJE8kefvOTxsAAPbelvHc3fcnedWK8dedYvtOcvP2pwYAAGcWVxgEAIAh8QwAAEPiGQAAhsQzAAAMiWcAABgSzwAAMCSeAQBgSDwDAMCQeAYAgCHxDAAAQ+IZAACGxDMAAAyJZwAAGBLPAAAwJJ4BAGBIPAMAwJB4BgCAIfEMAABD4hkAAIbEMwAADIlnAAAYEs8AADAkngEAYEg8AwDAkHgGAIAh8QwAAEPiGQAAhsQzAAAMiWcAABgSzwAAMCSeAQBgSDwDAMCQeAYAgCHxDAAAQ+IZAACGxDMAAAyJZwAAGBLPAAAwJJ4BAGBIPAMAwJB4BgCAIfEMAABD4hkAAIbEMwAADIlnAAAYEs8AADAkngEAYEg8AwDAkHgGAIAh8QwAAEPiGQAAhsQzAAAMiWcAABgSzwAAMCSeAQBgSDwDAMCQeAYAgCHxDAAAQ+IZAACGxDMAAAyJZwAAGNq37gk8m/2H7nzG2PHD161hJgAAYOUZAADGxDMAAAyJZwAAGBLPAAAwJJ4BAGBIPAMAwJB4BgCAIfEMAABD4hkAAIbEMwAADG0Zz1X1vKr6VFX9WVU9WFW/sIy/oqo+WVWfr6rfrqpvW8YvWh4fW57fv7s/AgAA7I3JyvM3kryuu38gyZVJrq2qa5L8YpJbuvtAkq8muWnZ/qYkX+3u70lyy7IdAACc9baM597wN8vDC5evTvK6JL+zjN+W5E3L/euXx1mef31V1Y7NGAAA1mR0zHNVXVBV9yV5LMndSf5Hkq9195PLJieSXLbcvyzJw0myPP94khfv5KQBAGAdRvHc3Se7+8oklye5Osn3rtpsuV21ytxPH6iqg1V1tKqOnnzi8el8AQBgbZ7T2Ta6+2tJPp7kmiSXVNW+5anLkzyy3D+R5IokWZ6/OMlXVrzXke6+qruvuuD5F5/e7AEAYA9Nzrbx0qq6ZLn/7Ul+OMlDST6W5MeXzW5M8pHl/h3L4yzPf7S7n7HyDAAAZ5t9W2+SS5PcVlUXZCO2b+/u36+qzyX5UFX9xyR/muTWZftbk/zXqjqWjRXnG3Zh3gAAsOe2jOfuvj/Jq1aMfyEbxz8/ffxvk7x5R2YHAABnEFcYBACAIfEMAABD4hkAAIbEMwAADIlnAAAYEs8AADAkngEAYEg8AwDAkHgGAIAh8QwAAEPiGQAAhsQzAAAMiWcAABgSzwAAMCSeAQBgSDwDAMCQeAYAgCHxDAAAQ+IZAACGxDMAAAyJZwAAGBLPAAAwJJ4BAGBIPAMAwJB4BgCAIfEMAABD4hkAAIbEMwAADIlnAAAYEs8AADAkngEAYEg8AwDAkHgGAIAh8QwAAEPiGQAAhsQzAAAMiWcAABgSzwAAMCSeAQBgSDwDAMCQeAYAgCHxDAAAQ+IZAACGxDMAAAyJZwAAGBLPAAAwJJ4BAGBIPAMAwJB4BgCAIfEMAABD4hkAAIbEMwAADIlnAAAYEs8AADAkngEAYEg8AwDAkHgGAIAh8QwAAEPiGQAAhsQzAAAMiWcAABgSzwAAMCSeAQBgaN+6J/Bc7T9058rx44ev2+OZAABwvrHyDAAAQ+IZAACGxDMAAAyJZwAAGBLPAAAwJJ4BAGBIPAMAwJB4BgCAIfEMAABDW15hsKquSPKBJH83yTeTHOnuX62qn0/yb5L8r2XTd3X3Xctr3pnkpiQnk/y77v7DXZj7OckVFAEAzlyTy3M/meRnuvszVfWCJPdW1d3Lc7d093/avHFVvTLJDUm+L8nfS/Lfq+rvd/fJnZw4AADstS0P2+juR7v7M8v9ryd5KMllz/KS65N8qLu/0d1fTHIsydU7MVkAAFin53TMc1XtT/KqJJ9cht5RVfdX1fuq6oXL2GVJHt70shNZEdtVdbCqjlbV0ZNPPP6cJw4AAHttHM9V9Z1JfjfJT3X3Xyd5b5LvTnJlkkeT/NJTm654eT9joPtId1/V3Vdd8PyLn/PEAQBgr43iuaouzEY4f7C7fy9JuvvL3X2yu7+Z5NfzrUMzTiS5YtPLL0/yyM5NGQAA1mPLeK6qSnJrkoe6+5c3jV+6abMfS/LAcv+OJDdU1UVV9YokB5J8auemDAAA6zE528Zrkrw1yWer6r5l7F1J3lJVV2bjkIzjSX4iSbr7waq6PcnnsnGmjpudaQMAgHPBlvHc3X+S1ccx3/Usr3l3kndvY14AAHDGcYVBAAAYEs8AADAkngEAYEg8AwDAkHgGAIAh8QwAAEPiGQAAhsQzAAAMiWcAABgSzwAAMCSeAQBgSDwDAMCQeAYAgCHxDAAAQ+IZAACGxDMAAAyJZwAAGBLPAAAwJJ4BAGBIPAMAwJB4BgCAIfEMAABD4hkAAIbEMwAADIlnAAAYEs8AADAkngEAYEg8AwDAkHgGAIAh8QwAAEPiGQAAhsQzAAAMiWcAABgSzwAAMCSeAQBgSDwDAMCQeAYAgCHxDAAAQ+IZAACGxDMAAAyJZwAAGNq37gmcz/YfunPdUwAA4Dmw8gwAAEPiGQAAhsQzAAAMiWcAABgSzwAAMCSeAQBgSDwDAMCQeAYAgCHxDAAAQ+IZAACGxDMAAAyJZwAAGBLPAAAwJJ4BAGBIPAMAwJB4BgCAoX3rnsBO2X/ozpXjxw9ft8czAQDgXGXlGQAAhsQzAAAMiWcAABgSzwAAMCSeAQBgSDwDAMCQeAYAgKFz5jzPZ7JTnYMaAICzi5VnAAAYEs8AADDksI0d5PAMAIBzm5VnAAAYEs8AADC0ZTxX1RVV9bGqeqiqHqyqn1zGX1RVd1fV55fbFy7jVVXvqapjVXV/Vb16t38IAADYC5OV5yeT/Ex3f2+Sa5LcXFWvTHIoyT3dfSDJPcvjJHlDkgPL18Ek793xWQMAwBpsGc/d/Wh3f2a5//UkDyW5LMn1SW5bNrstyZuW+9cn+UBv+ESSS6rq0h2fOQAA7LHndMxzVe1P8qokn0zy8u5+NNkI7CQvWza7LMnDm152YhkDAICz2vhUdVX1nUl+N8lPdfdfV9UpN10x1ive72A2DuvIBd/10uk0zhhOSwcAcP4ZxXNVXZiNcP5gd//eMvzlqrq0ux9dDst4bBk/keSKTS+/PMkjT3/P7j6S5EiSXHTpgWfE9TqsCuLjh69bw0wAADgTTc62UUluTfJQd//ypqfuSHLjcv/GJB/ZNP625awb1yR5/KnDOwAA4Gw2WXl+TZK3JvlsVd23jL0ryeEkt1fVTUm+lOTNy3N3JXljkmNJnkjy9h2dMQAArMmW8dzdf5LVxzEnyetXbN9Jbt7mvAAA4IzjCoMAADAkngEAYEg8AwDAkHgGAIAh8QwAAEPiGQAAhsQzAAAMiWcAABgSzwAAMCSeAQBgSDwDAMCQeAYAgCHxDAAAQ+IZAACGxDMAAAyJZwAAGBLPAAAwJJ4BAGBIPAMAwJB4BgCAIfEMAABD4hkAAIbEMwAADIlnAAAYEs8AADAkngEAYEg8AwDAkHgGAIAh8QwAAEPiGQAAhsQzAAAMiWcAABgSzwAAMCSeAQBgSDwDAMCQeAYAgCHxDAAAQ+IZAACGxDMAAAyJZwAAGBLPAAAwJJ4BAGBo37onsNv2H7rzGWPHD1+3hpkAAHC2s/IMAABD5/zK8yqrVqMBAGArVp4BAGBIPAMAwJB4BgCAIfEMAABD4hkAAIbEMwAADIlnAAAYOi/P8/xcOCc0AABPsfIMAABD4hkAAIbEMwAADIlnAAAYEs8AADAkngEAYEg8AwDAkHgGAIAh8QwAAEPiGQAAhsQzAAAMiWcAABgSzwAAMCSeAQBgSDwDAMCQeAYAgCHxDAAAQ+IZAACGxDMAAAyJZwAAGNoynqvqfVX1WFU9sGns56vqL6vqvuXrjZuee2dVHauqv6iqH92tiQMAwF6brDy/P8m1K8Zv6e4rl6+7kqSqXpnkhiTft7zm16rqgp2aLAAArNOW8dzdf5zkK8P3uz7Jh7r7G939xSTHkly9jfkBAMAZYzvHPL+jqu5fDut44TJ2WZKHN21zYhl7hqo6WFVHq+roySce38Y0AABgb5xuPL83yXcnuTLJo0l+aRmvFdv2qjfo7iPdfVV3X3XB8y8+zWkAAMDeOa147u4vd/fJ7v5mkl/Ptw7NOJHkik2bXp7kke1NEQAAzgynFc9Vdemmhz+W5KkzcdyR5IaquqiqXpHkQJJPbW+KAABwZti31QZV9VtJXpvkJVV1IsnPJXltVV2ZjUMyjif5iSTp7ger6vYkn0vyZJKbu/vk7kwdAAD21pbx3N1vWTF867Ns/+4k797OpAAA4EzkCoMAADAkngEAYEg8AwDAkHgGAIAh8QwAAEPiGQAAhsQzAAAMiWcAABgSzwAAMCSeAQBgSDwDAMCQeAYAgKF9654AM/sP3fmMseOHr1vDTAAAzl9WngEAYEg8AwDAkHgGAIAh8QwAAEPiGQAAhsQzAAAMiWcAABgSzwAAMCSeAQBgSDwDAMCQeAYAgCHxDAAAQ+IZAACGxDMAAAyJZwAAGBLPAAAwJJ4BAGBIPAMAwJB4BgCAIfEMAABD4hkAAIbEMwAADIlnAAAYEs8AADAkngEAYEg8AwDAkHgGAIAh8QwAAEPiGQAAhsQzAAAMiWcAABgSzwAAMCSeAQBgSDwDAMCQeAYAgCHxDAAAQ+IZAACGxDMAAAyJZwAAGBLPAAAwJJ4BAGBIPAMAwJB4BgCAIfEMAABD4hkAAIbEMwAADIlnAAAYEs8AADAkngEAYEg8AwDAkHgGAIChfeueAKdv/6E7V44fP3zdHs8EAOD8YOUZAACGxDMAAAyJZwAAGBLPAAAwJJ4BAGBIPAMAwJB4BgCAoS3juareV1WPVdUDm8ZeVFV3V9Xnl9sXLuNVVe+pqmNVdX9VvXo3Jw8AAHtpsvL8/iTXPm3sUJJ7uvtAknuWx0nyhiQHlq+DSd67M9MEAID12zKeu/uPk3zlacPXJ7ltuX9bkjdtGv9Ab/hEkkuq6tKdmiwAAKzT6R7z/PLufjRJltuXLeOXJXl403YnljEAADjr7fQfDNaKsV65YdXBqjpaVUdPPvH4Dk8DAAB23unG85efOhxjuX1sGT+R5IpN212e5JFVb9DdR7r7qu6+6oLnX3ya0wAAgL1zuvF8R5Ibl/s3JvnIpvG3LWfduCbJ408d3gEAAGe7fVttUFW/leS1SV5SVSeS/FySw0lur6qbknwpyZuXze9K8sYkx5I8keTtuzBnAABYiy3jubvfcoqnXr9i205y83YnBQAAZyJXGAQAgCHxDAAAQ+IZAACGxDMAAAyJZwAAGBLPAAAwJJ4BAGBIPAMAwJB4BgCAIfEMAABD4hkAAIbEMwAADIlnAAAYEs8AADAkngEAYEg8AwDAkHgGAIAh8QwAAEPiGQAAhvatewLsvP2H7nzG2PHD161hJgAA5xYrzwAAMCSeAQBgSDwDAMCQeAYAgCHxDAAAQ+IZAACGxDMAAAw5z/N5YtW5nxPnfwYAeC6sPAMAwJB4BgCAIfEMAABD4hkAAIbEMwAADIlnAAAYEs8AADAkngEAYEg8AwDAkCsMnudceRAAYM7KMwAADIlnAAAYEs8AADAkngEAYMgfDLLSqj8k9EeEAMD5zsozAAAMiWcAABgSzwAAMCSeAQBgSDwDAMCQeAYAgCHxDAAAQ+IZAACGxDMAAAy5wiC7YtUVChNXKQQAzm5WngEAYEg8AwDAkHgGAIAh8QwAAEPiGQAAhsQzAAAMiWcAABgSzwAAMCSeAQBgSDwDAMCQeAYAgCHxDAAAQ/vWPQHOHvsP3bly/Pjh6/Z4JgAA62HlGQAAhsQzAAAMiWcAABgSzwAAMCSeAQBgSDwDAMCQeAYAgKFtnee5qo4n+XqSk0me7O6rqupFSX47yf4kx5P8y+7+6vamCQAA67cTK88/1N1XdvdVy+NDSe7p7gNJ7lkeAwDAWW83Dtu4Pslty/3bkrxpF74HAADsue3Gcyf5o6q6t6oOLmMv7+5Hk2S5fdmqF1bVwao6WlVHTz7x+DanAQAAu29bxzwneU13P1JVL0tyd1X9+fSF3X0kyZEkuejSA73NeQAAwK7b1spzdz+y3D6W5MNJrk7y5aq6NEmW28e2O0kAADgTnHY8V9V3VNULnrqf5EeSPJDkjiQ3LpvdmOQj250kAACcCbZz2MbLk3y4qp56n9/s7j+oqk8nub2qbkrypSRv3v40OZPtP3TnuqcAALAnTjueu/sLSX5gxfj/TvL67UwKAADORK4wCAAAQ+IZAACGxDMAAAyJZwAAGBLPAAAwJJ4BAGBIPAMAwJB4BgCAIfEMAABD4hkAAIbEMwAADIlnAAAYEs8AADAkngEAYEg8AwDAkHgGAIAh8QwAAEP71j0BOJX9h+5cOX788HV7PBMAgA1WngEAYMjKM3vKajIAcDaz8gwAAEPiGQAAhsQzAAAMiWcAABgSzwAAMCSeAQBgSDwDAMCQeAYAgCHxDAAAQ+IZAACGXJ6bM8KpLtsNAHAmsfIMAABD4hkAAIbEMwAADIlnAAAYEs8AADAkngEAYEg8AwDAkHgGAIAh8QwAAEPiGQAAhsQzAAAMiWcAABgSzwAAMCSeAQBgSDwDAMCQeAYAgCHxDAAAQ+IZAACGxDMAAAyJZwAAGNq37gnATth/6M6V48cPX7fHMwEAzmVWngEAYMjKM+e0VSvSVqMBgNNl5RkAAIasPHPWOdXxzQAAu83KMwAADIlnAAAYEs8AADAkngEAYEg8AwDAkHgGAIAh8QwAAEPiGQAAhlwkhfPOqS6y4rLdAMBWrDwDAMCQeAYAgCHxDAAAQ455hoVjoQGArYhn2EGrAnwn4lvYA8CZwWEbAAAwZOUZtrBbq8k74UyeGwCci6w8AwDA0K6tPFfVtUl+NckFSX6juw/v1veCvXaqY5Cfy7anWiF+Lu8NAOytXYnnqrogyX9O8s+SnEjy6aq6o7s/txvfD/gWf1wIALtntw7buDrJse7+Qnf/nyQfSnL9Ln0vAADYE9XdO/+mVT+e5Nru/tfL47cm+cHufsembQ4mObg8/P4kD+z4RDjbvSTJX617Epxx7BesYr9gFfsFq/yD7n7B6b54t455rhVj/1+ld/eRJEeSpKqOdvdVuzQXzlL2C1axX7CK/YJV7BesUlVHt/P63Tps40SSKzY9vjzJI7v0vQAAYE/sVjx/OsmBqnpFVX1bkhuS3LFL3wsAAPbErhy20d1PVtU7kvxhNk5V977ufvBZXnJkN+bBWc9+wSr2C1axX7CK/YJVtrVf7MofDAIAwLnIFQYBAGBIPAMAwNDa47mqrq2qv6iqY1V1aN3zYX2q6nhVfbaq7nvqNDJV9aKquruqPr/cvnDd82R3VdX7quqxqnpg09jK/aA2vGf5/Li/ql69vpmzm06xX/x8Vf3l8plxX1W9cdNz71z2i7+oqh9dz6zZTVV1RVV9rKoeqqoHq+onl3GfF+exZ9kvduzzYq3xvOky3m9I8sokb6mqV65zTqzdD3X3lZvOy3koyT3dfSDJPctjzm3vT3Lt08ZOtR+8IcmB5etgkvfu0RzZe+/PM/eLJLll+cy4srvvSpLl35Ebknzf8ppfW/694dzyZJKf6e7vTXJNkpuX//Y+L85vp9ovkh36vFj3yrPLeLOV65Pctty/Lcmb1jgX9kB3/3GSrzxt+FT7wfVJPtAbPpHkkqq6dG9myl46xX5xKtcn+VB3f6O7v5jkWDb+veEc0t2PdvdnlvtfT/JQksvi8+K89iz7xak858+LdcfzZUke3vT4RJ79B+Tc1kn+qKruXS7fniQv7+5Hk43/IZK8bG2zY51OtR/4DOEdy6/g37fpsC77xXmmqvYneVWST8bnBYun7RfJDn1erDuet7yMN+eV13T3q7Pxq7Wbq+qfrntCnPF8hpzf3pvku5NcmeTRJL+0jNsvziNV9Z1JfjfJT3X3Xz/bpivG7BfnqBX7xY59Xqw7nl3Gm/+nux9Zbh9L8uFs/Nrky0/9Wm25fWx9M2SNTrUf+Aw5j3X3l7v7ZHd/M8mv51u/arVfnCeq6sJsBNIHu/v3lmGfF+e5VfvFTn5erDueXcabJElVfUdVveCp+0l+JMkD2dgfblw2uzHJR9YzQ9bsVPvBHUnetvwV/TVJHn/q17Wc+552vOqPZeMzI9nYL26oqouq6hXZ+AOxT+31/NhdVVVJbk3yUHf/8qanfF6cx061X+zk58WuXJ576jQu48256+VJPryxz2dfkt/s7j+oqk8nub2qbkrypSRvXuMc2QNV9VtJXpvkJVV1IsnPJTmc1fvBXUnemI0/8Hgiydv3fMLsiVPsF6+tqiuz8SvW40l+Ikm6+8Gquj3J57Lxl/c3d/fJdcybXfWaJG9N8tmqum8Ze1d8XpzvTrVfvGWnPi9cnhsAAIbWfdgGAACcNcQzAAAMiWcAABgSzwAAMCSeAQBgSDwDAMCQeAYAgKH/C0kJ1iH9HUmkAAAAAElFTkSuQmCC\n",
      "text/plain": [
       "<Figure size 864x864 with 1 Axes>"
      ]
     },
     "metadata": {
      "needs_background": "light"
     },
     "output_type": "display_data"
    },
    {
     "data": {
      "image/png": "iVBORw0KGgoAAAANSUhEUgAAAs8AAAKvCAYAAACVhiLtAAAABHNCSVQICAgIfAhkiAAAAAlwSFlzAAALEgAACxIB0t1+/AAAADh0RVh0U29mdHdhcmUAbWF0cGxvdGxpYiB2ZXJzaW9uMy4xLjMsIGh0dHA6Ly9tYXRwbG90bGliLm9yZy+AADFEAAAeBUlEQVR4nO3dbaxl51nf4f9dj3EIpHbe5dqWJoJpS6DCSafGUqTKJBQcT1UHiVSOqsSKXA2VHCkI1DLhCyA10iAVTCMVSwancSpIsIAoFk4pqZMI8SEvEzCOHRNlmkzjwVYsmsQEWaTycPfDWW4O9h6f23Ne9rxcl3S093722vs8R17e89Nz1lmrujsAAMDW/t66JwAAAOcK8QwAAEPiGQAAhsQzAAAMiWcAABgSzwAAMDSO56q6qKr+tKp+f3n8qqr6VFV9sap+u6q+Yxm/ZHl8fHl+/+5MHQAA9tbzWXl+Z5KHNz3+pSS3dfeBJF9PcssyfkuSr3f39ya5bdkOAADOeaN4rqorkxxK8hvL40ry+iS/s2xyV5I3LfdvXB5nef4Ny/YAAHBO2zfc7leT/IckL1oevzTJN7r7qeXxySRXLPevSPJIknT3U1X1xLL9X25+w6o6nORwktTFL/inF7/0ymd9039yxaXjHwQAALby2c9+9i+7++Vn+vot47mq/mWSx7v7s1V13dPDKzbtwXPfHui+I8kdSXLJ5Qf68pt/9VkvOnb00FbTAwCAsar639t5/WTl+XVJ/lVV3ZDkBUn+fjZWoi+rqn3L6vOVSR5dtj+Z5KokJ6tqX5JLk3xtO5MEAICzwZbHPHf3u7r7yu7en+SmJB/r7n+T5ONJfmLZ7OYkH17u37M8zvL8x7r7WSvPAABwrtnOeZ5/NslPV9XxbBzTfOcyfmeSly7jP53kyPamCAAAZ4fpHwwmSbr7E0k+sdz/UpJrVmzzN0nevANzAwCAs4orDAIAwJB4BgCAIfEMAABD4hkAAIbEMwAADIlnAAAYEs8AADAkngEAYEg8AwDAkHgGAIAh8QwAAEPiGQAAhsQzAAAMiWcAABgSzwAAMCSeAQBgSDwDAMCQeAYAgCHxDAAAQ+IZAACGxDMAAAyJZwAAGBLPAAAwJJ4BAGBIPAMAwJB4BgCAIfEMAABD4hkAAIbEMwAADIlnAAAYEs8AADAkngEAYEg8AwDAkHgGAIAh8QwAAEPiGQAAhsQzAAAMiWcAABgSzwAAMCSeAQBgSDwDAMCQeAYAgCHxDAAAQ+IZAACGxDMAAAyJZwAAGBLPAAAwJJ4BAGBIPAMAwJB4BgCAIfEMAABD4hkAAIbEMwAADIlnAAAYEs8AADAkngEAYEg8AwDAkHgGAIAh8QwAAEPiGQAAhsQzAAAMiWcAABgSzwAAMCSeAQBgSDwDAMCQeAYAgCHxDAAAQ+IZAACGxDMAAAyJZwAAGBLPAAAwJJ4BAGBIPAMAwNCW8VxVL6iqT1fVn1XVQ1X1i8v4+6rqy1V1//J19TJeVfWeqjpeVQ9U1Wt3+4cAAIC9sG+wzbeSvL67/7qqLk7yx1X135fn/n13/84ztn9jkgPL1w8luX25BQCAc9qWK8+94a+XhxcvX/0cL7kxyfuX130yyWVVdfn2pwoAAOs1Oua5qi6qqvuTPJ7ko939qeWpdy+HZtxWVZcsY1ckeWTTy08uY898z8NVdayqjp168olt/AgAALA3RvHc3ae6++okVya5pqp+IMm7kvzjJP8syUuS/Oyyea16ixXveUd3H+zugxe98NIzmjwAAOyl53W2je7+RpJPJLm+ux9bDs34VpL/muSaZbOTSa7a9LIrkzy6A3MFAIC1mpxt4+VVddly/zuT/EiSP3/6OOaqqiRvSvLg8pJ7krxtOevGtUme6O7HdmX2AACwhyZn27g8yV1VdVE2Yvvu7v79qvpYVb08G4dp3J/k3y3bfyTJDUmOJ3kyydt3ftoAALD3tozn7n4gyWtWjL/+NNt3klu3PzUAADi7uMIgAAAMiWcAABgSzwAAMCSeAQBgSDwDAMCQeAYAgCHxDAAAQ+IZAACGxDMAAAyJZwAAGBLPAAAwJJ4BAGBIPAMAwJB4BgCAIfEMAABD4hkAAIbEMwAADIlnAAAYEs8AADAkngEAYEg8AwDAkHgGAIAh8QwAAEPiGQAAhsQzAAAMiWcAABgSzwAAMCSeAQBgSDwDAMCQeAYAgCHxDAAAQ+IZAACGxDMAAAyJZwAAGBLPAAAwJJ4BAGBIPAMAwJB4BgCAIfEMAABD4hkAAIbEMwAADIlnAAAYEs8AADAkngEAYEg8AwDAkHgGAIAh8QwAAEPiGQAAhsQzAAAMiWcAABgSzwAAMCSeAQBgSDwDAMCQeAYAgCHxDAAAQ+IZAACGxDMAAAyJZwAAGBLPAAAwJJ4BAGBIPAMAwJB4BgCAIfEMAABD4hkAAIb2rXsCz2X/kXufNXbi6KE1zAQAAKw8AwDAmHgGAIAh8QwAAEPiGQAAhsQzAAAMiWcAABgSzwAAMLRlPFfVC6rq01X1Z1X1UFX94jL+qqr6VFV9sap+u6q+Yxm/ZHl8fHl+/+7+CAAAsDcmK8/fSvL67v7BJFcnub6qrk3yS0lu6+4DSb6e5JZl+1uSfL27vzfJbct2AABwztsynnvDXy8PL16+Osnrk/zOMn5Xkjct929cHmd5/g1VVTs2YwAAWJPRMc9VdVFV3Z/k8SQfTfK/knyju59aNjmZ5Irl/hVJHkmS5fknkrx0JycNAADrMIrn7j7V3VcnuTLJNUm+b9Vmy+2qVeZ+5kBVHa6qY1V17NSTT0znCwAAa/O8zrbR3d9I8okk1ya5rKr2LU9dmeTR5f7JJFclyfL8pUm+tuK97ujug9198KIXXnpmswcAgD00OdvGy6vqsuX+dyb5kSQPJ/l4kp9YNrs5yYeX+/csj7M8/7HuftbKMwAAnGv2bb1JLk9yV1VdlI3Yvru7f7+qPp/kg1X1H5P8aZI7l+3vTPLfqup4Nlacb9qFeQMAwJ7bMp67+4Ekr1kx/qVsHP/8zPG/SfLmHZkdAACcRVxhEAAAhsQzAAAMiWcAABgSzwAAMCSeAQBgSDwDAMCQeAYAgCHxDAAAQ+IZAACGxDMAAAyJZwAAGBLPAAAwJJ4BAGBIPAMAwJB4BgCAIfEMAABD4hkAAIbEMwAADIlnAAAYEs8AADAkngEAYEg8AwDAkHgGAIAh8QwAAEPiGQAAhsQzAAAMiWcAABgSzwAAMCSeAQBgSDwDAMCQeAYAgCHxDAAAQ+IZAACGxDMAAAyJZwAAGBLPAAAwJJ4BAGBIPAMAwJB4BgCAIfEMAABD4hkAAIbEMwAADIlnAAAYEs8AADAkngEAYEg8AwDAkHgGAIAh8QwAAEPiGQAAhsQzAAAMiWcAABgSzwAAMCSeAQBgSDwDAMCQeAYAgCHxDAAAQ+IZAACGxDMAAAztW/cE+Lv2H7l35fiJo4f2eCYAADyTlWcAABgSzwAAMCSeAQBgSDwDAMCQeAYAgCHxDAAAQ+IZAACGxDMAAAyJZwAAGBLPAAAwJJ4BAGBIPAMAwJB4BgCAIfEMAABDW8ZzVV1VVR+vqoer6qGqeucy/gtV9RdVdf/ydcOm17yrqo5X1Req6sd28wcAAIC9sm+wzVNJfqa7/6SqXpTks1X10eW527r7P23euKpeneSmJN+f5B8k+Z9V9Q+7+9ROThwAAPbalivP3f1Yd//Jcv+bSR5OcsVzvOTGJB/s7m9195eTHE9yzU5MFgAA1ul5HfNcVfuTvCbJp5ahd1TVA1X13qp68TJ2RZJHNr3sZFbEdlUdrqpjVXXs1JNPPO+JAwDAXhvHc1V9d5LfTfJT3f1XSW5P8j1Jrk7yWJJffnrTFS/vZw1039HdB7v74EUvvPR5TxwAAPbaKJ6r6uJshPNvdvfvJUl3f7W7T3X33yb59Xz70IyTSa7a9PIrkzy6c1MGAID1mJxto5LcmeTh7v6VTeOXb9rsx5M8uNy/J8lNVXVJVb0qyYEkn965KQMAwHpMzrbxuiRvTfK5qrp/Gfu5JG+pqquzcUjGiSQ/mSTd/VBV3Z3k89k4U8etzrQBAMD5YMt47u4/zurjmD/yHK95d5J3b2NeAABw1nGFQQAAGBLPAAAwJJ4BAGBIPAMAwJB4BgCAIfEMAABD4hkAAIbEMwAADIlnAAAYEs8AADAkngEAYEg8AwDAkHgGAIAh8QwAAEPiGQAAhsQzAAAMiWcAABgSzwAAMCSeAQBgSDwDAMCQeAYAgCHxDAAAQ+IZAACGxDMAAAyJZwAAGBLPAAAwJJ4BAGBIPAMAwJB4BgCAIfEMAABD+9Y9gedr/5F7V46fOHpoj2cCAMCFxsozAAAMiWcAABgSzwAAMCSeAQBgSDwDAMCQeAYAgCHxDAAAQ+IZAACGxDMAAAyJZwAAGBLPAAAwJJ4BAGBIPAMAwJB4BgCAIfEMAABD4hkAAIbEMwAADIlnAAAYEs8AADAkngEAYEg8AwDAkHgGAIChfeuewNlu/5F7V46fOHpoj2cCAMC6WXkGAIAh8QwAAEPiGQAAhsQzAAAMiWcAABg6b8624awYAADsNivPAAAwJJ4BAGBIPAMAwJB4BgCAIfEMAABD4hkAAIbEMwAADIlnAAAYEs8AADAkngEAYEg8AwDAkHgGAIChLeO5qq6qqo9X1cNV9VBVvXMZf0lVfbSqvrjcvngZr6p6T1Udr6oHquq1u/1DAADAXpisPD+V5Ge6+/uSXJvk1qp6dZIjSe7r7gNJ7lseJ8kbkxxYvg4nuX3HZw0AAGuwb6sNuvuxJI8t979ZVQ8nuSLJjUmuWza7K8knkvzsMv7+7u4kn6yqy6rq8uV9zhv7j9z7rLETRw+tYSYAAOyV53XMc1XtT/KaJJ9K8sqng3i5fcWy2RVJHtn0spPLGAAAnNPG8VxV353kd5P8VHf/1XNtumKsV7zf4ao6VlXHTj35xHQaAACwNqN4rqqLsxHOv9ndv7cMf7WqLl+evzzJ48v4ySRXbXr5lUkefeZ7dvcd3X2wuw9e9MJLz3T+AACwZyZn26gkdyZ5uLt/ZdNT9yS5ebl/c5IPbxp/23LWjWuTPHG+He8MAMCFacs/GEzyuiRvTfK5qrp/Gfu5JEeT3F1VtyT5SpI3L899JMkNSY4neTLJ23d0xgAAsCaTs238cVYfx5wkb1ixfSe5dZvzAgCAs44rDAIAwJB4BgCAIfEMAABDkz8YZJtWXY0wcUVCAIBzjZVnAAAYEs8AADAkngEAYEg8AwDAkHgGAIAh8QwAAEPiGQAAhsQzAAAMiWcAABi6IK8w6Ip/AACcifM+nk8XygAA8Hw5bAMAAIbEMwAADJ33h22czRxSAgBwbrHyDAAAQ+IZAACGxDMAAAyJZwAAGBLPAAAwJJ4BAGDIqeo2ceo4AACei5VnAAAYEs8AADAkngEAYEg8AwDAkHgGAIAh8QwAAEPiGQAAhsQzAAAMiWcAABgSzwAAMCSeAQBgSDwDAMCQeAYAgCHxDAAAQ+IZAACGxDMAAAyJZwAAGBLPAAAwJJ4BAGBIPAMAwJB4BgCAIfEMAABD4hkAAIbEMwAADIlnAAAYEs8AADAkngEAYEg8AwDAkHgGAIAh8QwAAEPiGQAAhsQzAAAMiWcAABgSzwAAMCSeAQBgSDwDAMCQeAYAgCHxDAAAQ+IZAACGxDMAAAyJZwAAGBLPAAAwJJ4BAGBIPAMAwJB4BgCAIfEMAABD+9Y9gfPJ/iP3rnsKAADsIivPAAAwtGU8V9V7q+rxqnpw09gvVNVfVNX9y9cNm557V1Udr6ovVNWP7dbEAQBgr01Wnt+X5PoV47d199XL10eSpKpeneSmJN+/vObXquqinZosAACs05bx3N1/lORrw/e7MckHu/tb3f3lJMeTXLON+QEAwFljO8c8v6OqHlgO63jxMnZFkkc2bXNyGXuWqjpcVceq6tipJ5/YxjQAAGBvnGk8357ke5JcneSxJL+8jNeKbXvVG3T3Hd19sLsPXvTCS89wGgAAsHfOKJ67+6vdfaq7/zbJr+fbh2acTHLVpk2vTPLo9qYIAABnhzOK56q6fNPDH0/y9Jk47klyU1VdUlWvSnIgyae3N0UAADg7bHmRlKr6QJLrkrysqk4m+fkk11XV1dk4JONEkp9Mku5+qKruTvL5JE8lubW7T+3O1AEAYG9tGc/d/ZYVw3c+x/bvTvLu7UwKAADORq4wCAAAQ+IZAACGxDMAAAyJZwAAGNryDwY5O+w/cu+zxk4cPbSGmQAAXLisPAMAwJB4BgCAIfEMAABD4hkAAIbEMwAADIlnAAAYEs8AADAkngEAYEg8AwDAkHgGAIAh8QwAAEPiGQAAhsQzAAAMiWcAABgSzwAAMCSeAQBgSDwDAMCQeAYAgCHxDAAAQ+IZAACGxDMAAAyJZwAAGBLPAAAwJJ4BAGBIPAMAwJB4BgCAIfEMAABD4hkAAIbEMwAADIlnAAAYEs8AADAkngEAYEg8AwDAkHgGAIAh8QwAAEPiGQAAhsQzAAAMiWcAABgSzwAAMCSeAQBgSDwDAMCQeAYAgCHxDAAAQ+IZAACGxDMAAAyJZwAAGBLPAAAwJJ4BAGBIPAMAwJB4BgCAIfEMAABD4hkAAIbEMwAADIlnAAAYEs8AADAkngEAYEg8AwDAkHgGAIAh8QwAAEPiGQAAhsQzAAAMiWcAABgSzwAAMCSeAQBgaN+6J8CZ23/k3pXjJ44e2uOZAABcGKw8AwDAkHgGAIChLeO5qt5bVY9X1YObxl5SVR+tqi8uty9exquq3lNVx6vqgap67W5OHgAA9tJk5fl9Sa5/xtiRJPd194Ek9y2Pk+SNSQ4sX4eT3L4z0wQAgPXbMp67+4+SfO0ZwzcmuWu5f1eSN20af39v+GSSy6rq8p2aLAAArNOZHvP8yu5+LEmW21cs41ckeWTTdieXMQAAOOft9B8M1oqxXrlh1eGqOlZVx049+cQOTwMAAHbemcbzV58+HGO5fXwZP5nkqk3bXZnk0VVv0N13dPfB7j540QsvPcNpAADA3jnTeL4nyc3L/ZuTfHjT+NuWs25cm+SJpw/vAACAc92WVxisqg8kuS7Jy6rqZJKfT3I0yd1VdUuSryR587L5R5LckOR4kieTvH0X5gwAAGuxZTx391tO89QbVmzbSW7d7qQAAOBs5AqDAAAwJJ4BAGBIPAMAwJB4BgCAIfEMAABD4hkAAIbEMwAADIlnAAAYEs8AADAkngEAYEg8AwDAkHgGAIAh8QwAAEP71j0Bdt7+I/c+a+zE0UNrmAkAwPnFyjMAAAyJZwAAGBLPAAAwJJ4BAGBIPAMAwJB4BgCAIfEMAABD4hkAAIbEMwAADIlnAAAYEs8AADAkngEAYEg8AwDAkHgGAIAh8QwAAEPiGQAAhsQzAAAMiWcAABjat+4JsDf2H7l35fiJo4f2eCYAAOcuK88AADAkngEAYEg8AwDAkHgGAIAh8QwAAEPiGQAAhsQzAAAMiWcAABgSzwAAMCSeAQBgSDwDAMCQeAYAgCHxDAAAQ+IZAACGxDMAAAyJZwAAGNq37gmwXvuP3Lty/MTRQ3s8EwCAs594ZkxoAwAXOodtAADAkHgGAIAhh22w0ukO0QAAuJBZeQYAgCHxDAAAQ+IZAACGxDMAAAyJZwAAGBLPAAAwJJ4BAGBIPAMAwJB4BgCAIfEMAABD4hkAAIbEMwAADIlnAAAYEs8AADAkngEAYEg8AwDAkHgGAIAh8QwAAEPiGQAAhvZt58VVdSLJN5OcSvJUdx+sqpck+e0k+5OcSPKvu/vr25smAACs306sPP9wd1/d3QeXx0eS3NfdB5LctzwGAIBz3m4ctnFjkruW+3cledMufA8AANhz243nTvKHVfXZqjq8jL2yux9LkuX2FateWFWHq+pYVR079eQT25wGAADsvm0d85zkdd39aFW9IslHq+rPpy/s7juS3JEkl1x+oLc5DwAA2HXbWnnu7keX28eTfCjJNUm+WlWXJ8ly+/h2JwkAAGeDM47nqvquqnrR0/eT/GiSB5Pck+TmZbObk3x4u5MEAICzwXYO23hlkg9V1dPv81vd/QdV9Zkkd1fVLUm+kuTN258mAACs3xnHc3d/KckPrhj/P0nesJ1JAQDA2cgVBgEAYEg8AwDAkHgGAIAh8QwAAEPbvUgKZP+Re581duLooTXMBABgd1l5BgCAIfEMAABD4hkAAIbEMwAADIlnAAAYEs8AADAkngEAYMh5ntkVq879nDj/MwBwbrPyDAAAQ+IZAACGHLbBnnI4BwBwLrPyDAAAQ+IZAACGxDMAAAyJZwAAGBLPAAAwJJ4BAGBIPAMAwJB4BgCAIfEMAABD4hkAAIbEMwAADO1b9wTgdPYfuXfl+Imjh/Z4JgAAG6w8AwDAkHgGAIAhh21wVjjdIRoAAGcTK88AADAkngEAYEg8AwDAkHgGAIAh8QwAAEPiGQAAhsQzAAAMiWcAABgSzwAAMCSeAQBgSDwDAMCQeAYAgKF9654APF/7j9z7rLETRw+tYSYAwIXGyjMAAAyJZwAAGBLPAAAwJJ4BAGBIPAMAwJB4BgCAIfEMAABD4hkAAIbEMwAADLnCIOeFVVcdTFZfefD5bAsAsJmVZwAAGLLyzHntdKvMAABnwsozAAAMiWcAABgSzwAAMCSeAQBgSDwDAMCQeAYAgCHxDAAAQ+IZAACGxDMAAAyJZwAAGHJ5bljsxKW8Txw9tO33XfUeAMDZwcozAAAMWXmGs8yqlerTrUY/n20BgO2z8gwAAEPiGQAAhhy2AeeAnfhjRgBg+6w8AwDA0K6tPFfV9Un+c5KLkvxGdx/dre8FnJnTrWj7o0MAWG1X4rmqLkryX5L8iyQnk3ymqu7p7s/vxvcDvm03g/j5HD4iwAE4H+3WYRvXJDne3V/q7v+b5INJbtyl7wUAAHuiunvn37TqJ5Jc393/dnn81iQ/1N3v2LTN4SSHl4c/kOTBHZ8I57qXJfnLdU+Cs479glXsF6xiv2CVf9TdLzrTF+/WMc+1YuzvVHp335HkjiSpqmPdfXCX5sI5yn7BKvYLVrFfsIr9glWq6th2Xr9bh22cTHLVpsdXJnl0l74XAADsid2K588kOVBVr6qq70hyU5J7dul7AQDAntiVwza6+6mqekeS/5GNU9W9t7sfeo6X3LEb8+CcZ79gFfsFq9gvWMV+wSrb2i925Q8GAQDgfOQKgwAAMCSeAQBgaO3xXFXXV9UXqup4VR1Z93xYn6o6UVWfq6r7nz6NTFW9pKo+WlVfXG5fvO55sruq6r1V9XhVPbhpbOV+UBves3x+PFBVr13fzNlNp9kvfqGq/mL5zLi/qm7Y9Ny7lv3iC1X1Y+uZNbupqq6qqo9X1cNV9VBVvXMZ93lxAXuO/WLHPi/WGs+bLuP9xiSvTvKWqnr1OufE2v1wd1+96bycR5Lc190Hkty3POb89r4k1z9j7HT7wRuTHFi+Die5fY/myN57X569XyTJbctnxtXd/ZEkWf4duSnJ9y+v+bXl3xvOL08l+Znu/r4k1ya5dflv7/Piwna6/SLZoc+Lda88u4w3W7kxyV3L/buSvGmNc2EPdPcfJfnaM4ZPtx/cmOT9veGTSS6rqsv3ZqbspdPsF6dzY5IPdve3uvvLSY5n498bziPd/Vh3/8ly/5tJHk5yRXxeXNCeY784nef9ebHueL4iySObHp/Mc/+AnN86yR9W1WeXy7cnySu7+7Fk43+IJK9Y2+xYp9PtBz5DeMfyK/j3bjqsy35xgamq/Ulek+RT8XnB4hn7RbJDnxfrjuctL+PNBeV13f3abPxq7daq+ufrnhBnPZ8hF7bbk3xPkquTPJbkl5dx+8UFpKq+O8nvJvmp7v6r59p0xZj94jy1Yr/Ysc+Ldcezy3jz/3X3o8vt40k+lI1fm3z16V+rLbePr2+GrNHp9gOfIRew7v5qd5/q7r9N8uv59q9a7RcXiKq6OBuB9Jvd/XvLsM+LC9yq/WInPy/WHc8u402SpKq+q6pe9PT9JD+a5MFs7A83L5vdnOTD65kha3a6/eCeJG9b/or+2iRPPP3rWs5/zzhe9cez8ZmRbOwXN1XVJVX1qmz8gdin93p+7K6qqiR3Jnm4u39l01M+Ly5gp9svdvLzYlcuzz11Bpfx5vz1yiQf2tjnsy/Jb3X3H1TVZ5LcXVW3JPlKkjevcY7sgar6QJLrkrysqk4m+fkkR7N6P/hIkhuy8QceTyZ5+55PmD1xmv3iuqq6Ohu/Yj2R5CeTpLsfqqq7k3w+G395f2t3n1rHvNlVr0vy1iSfq6r7l7Gfi8+LC93p9ou37NTnhctzAwDA0LoP2wAAgHOGeAYAgCHxDAAAQ+IZAACGxDMAAAyJZwAAGBLPAAAw9P8AgADSXdlKB10AAAAASUVORK5CYII=\n",
      "text/plain": [
       "<Figure size 864x864 with 1 Axes>"
      ]
     },
     "metadata": {
      "needs_background": "light"
     },
     "output_type": "display_data"
    },
    {
     "data": {
      "image/png": "iVBORw0KGgoAAAANSUhEUgAAAs8AAAKvCAYAAACVhiLtAAAABHNCSVQICAgIfAhkiAAAAAlwSFlzAAALEgAACxIB0t1+/AAAADh0RVh0U29mdHdhcmUAbWF0cGxvdGxpYiB2ZXJzaW9uMy4xLjMsIGh0dHA6Ly9tYXRwbG90bGliLm9yZy+AADFEAAAeFklEQVR4nO3dbahl93Xf8d+qRpHjxJX8zFQSjEmmbZyUjN2pIjAUx04TWVMqBeIiU2xhVCYFGRwS2ozzJgnUMIEmcg2NYBK5lksaRyQxFh41jSrbhLzww8hRZMmK8TSeWhMJidS24iDqosnqi7tV30h3NEtzH848fD5wuef8zz7nrsHbR1/23ffs6u4AAABn9ndWPQAAAJwvxDMAAAyJZwAAGBLPAAAwJJ4BAGBIPAMAwNA4nqvqkqr6k6r6xHL/dVX12ar6SlX9TlV917J+2XL/+PL4nu0ZHQAAdtaLOfL83iSPrLv/K0lu6+69Sb6R5JZl/ZYk3+ju709y27IdAACc90bxXFVXJTmQ5DeX+5XkLUl+d9nkziQ3LrdvWO5nefyty/YAAHBe2zXc7gNJ/l2Sly33X5nkm939zHL/ZJIrl9tXJnk0Sbr7map6atn+L9e/YFUdTHIwSerSl/zjS1951fN+6D+68vLxPwQAAM7k/vvv/8vufvXZPv+M8VxV/zzJk919f1W9+dnlDTbtwWPfWeg+kuRIkly2e2/vvvkDz3vSscMHzjQeAACMVdX/2szzJ0ee35TkX1TV9UlekuTvZu1I9BVVtWs5+nxVkseW7U8muTrJyaraleTyJF/fzJAAAHAuOOM5z939vu6+qrv3JLkpySe7+18l+VSSn1o2uznJx5fbdy/3szz+ye5+3pFnAAA432zmc55/PsnPVtXxrJ3TfMeyfkeSVy7rP5vk0OZGBACAc8P0DwaTJN396SSfXm7/eZJrNtjm/yR5+xbMBgAA5xRXGAQAgCHxDAAAQ+IZAACGxDMAAAyJZwAAGBLPAAAwJJ4BAGBIPAMAwJB4BgCAIfEMAABD4hkAAIbEMwAADIlnAAAYEs8AADAkngEAYEg8AwDAkHgGAIAh8QwAAEPiGQAAhsQzAAAMiWcAABgSzwAAMCSeAQBgSDwDAMCQeAYAgCHxDAAAQ+IZAACGxDMAAAyJZwAAGBLPAAAwJJ4BAGBIPAMAwJB4BgCAIfEMAABD4hkAAIbEMwAADIlnAAAYEs8AADAkngEAYEg8AwDAkHgGAIAh8QwAAEPiGQAAhsQzAAAMiWcAABgSzwAAMCSeAQBgSDwDAMCQeAYAgCHxDAAAQ+IZAACGxDMAAAyJZwAAGBLPAAAwJJ4BAGBIPAMAwJB4BgCAIfEMAABD4hkAAIbEMwAADIlnAAAYEs8AADAkngEAYEg8AwDAkHgGAIAh8QwAAEPiGQAAhsQzAAAMiWcAABgSzwAAMCSeAQBgSDwDAMCQeAYAgKEzxnNVvaSqPldVf1pVD1fVLy/rH66qr1bVA8vXvmW9quqDVXW8qh6sqjdu9z8CAAB2wq7BNt9O8pbu/uuqujTJH1fVf1se+7fd/bvP2f5tSfYuXz+S5PblOwAAnNfOeOS51/z1cvfS5atf4Ck3JPnI8rzPJLmiqnZvflQAAFit0TnPVXVJVT2Q5Mkk93b3Z5eH3r+cmnFbVV22rF2Z5NF1Tz+5rD33NQ9W1bGqOnbq6ac28U8AAICdMYrn7j7V3fuSXJXkmqr6oSTvS/IPk/yTJK9I8vPL5rXRS2zwmke6e39377/kpZef1fAAALCTXtSnbXT3N5N8Osl13f34cmrGt5P85yTXLJudTHL1uqddleSxLZgVAABWavJpG6+uqiuW29+d5MeS/Nmz5zFXVSW5MclDy1PuTvKu5VM3rk3yVHc/vi3TAwDADpp82sbuJHdW1SVZi+27uvsTVfXJqnp11k7TeCDJv1m2vyfJ9UmOJ3k6ybu3fmwAANh5Z4zn7n4wyRs2WH/LabbvJLdufjQAADi3uMIgAAAMiWcAABgSzwAAMCSeAQBgSDwDAMCQeAYAgCHxDAAAQ+IZAACGxDMAAAyJZwAAGBLPAAAwJJ4BAGBIPAMAwJB4BgCAIfEMAABD4hkAAIbEMwAADIlnAAAYEs8AADAkngEAYEg8AwDAkHgGAIAh8QwAAEPiGQAAhsQzAAAMiWcAABgSzwAAMCSeAQBgSDwDAMCQeAYAgCHxDAAAQ+IZAACGxDMAAAyJZwAAGBLPAAAwJJ4BAGBIPAMAwJB4BgCAIfEMAABD4hkAAIbEMwAADIlnAAAYEs8AADAkngEAYEg8AwDAkHgGAIAh8QwAAEPiGQAAhsQzAAAMiWcAABgSzwAAMCSeAQBgSDwDAMCQeAYAgCHxDAAAQ+IZAACGxDMAAAyJZwAAGBLPAAAwJJ4BAGBIPAMAwJB4BgCAIfEMAABD4hkAAIbEMwAADIlnAAAYEs8AADAkngEAYEg8AwDAkHgGAIAh8QwAAEPiGQAAhs4Yz1X1kqr6XFX9aVU9XFW/vKy/rqo+W1VfqarfqarvWtYvW+4fXx7fs73/BAAA2BmTI8/fTvKW7v7hJPuSXFdV1yb5lSS3dffeJN9Icsuy/S1JvtHd35/ktmU7AAA4750xnnvNXy93L12+Oslbkvzusn5nkhuX2zcs97M8/taqqi2bGAAAVmR0znNVXVJVDyR5Msm9Sf5nkm929zPLJieTXLncvjLJo0myPP5Ukldu5dAAALAKo3ju7lPdvS/JVUmuSfIDG222fN/oKHM/d6GqDlbVsao6durpp6bzAgDAyryoT9vo7m8m+XSSa5NcUVW7loeuSvLYcvtkkquTZHn88iRf3+C1jnT3/u7ef8lLLz+76QEAYAdNPm3j1VV1xXL7u5P8WJJHknwqyU8tm92c5OPL7buX+1ke/2R3P+/IMwAAnG92nXmT7E5yZ1VdkrXYvqu7P1FVX0ry0ar690n+JMkdy/Z3JPkvVXU8a0ecb9qGuQEAYMfVuXBQ+LLde3v3zR8YbXvi8IFtngYAgAtVVd3f3fvP9vmuMAgAAEPiGQAAhsQzAAAMiWcAABgSzwAAMCSeAQBgSDwDAMCQeAYAgCHxDAAAQ+IZAACGxDMAAAyJZwAAGBLPAAAwJJ4BAGBIPAMAwJB4BgCAIfEMAABD4hkAAIbEMwAADIlnAAAYEs8AADAkngEAYEg8AwDAkHgGAIAh8QwAAEPiGQAAhsQzAAAMiWcAABgSzwAAMCSeAQBgSDwDAMCQeAYAgCHxDAAAQ+IZAACGxDMAAAyJZwAAGBLPAAAwJJ4BAGBIPAMAwJB4BgCAIfEMAABD4hkAAIbEMwAADIlnAAAYEs8AADAkngEAYEg8AwDAkHgGAIAh8QwAAEPiGQAAhsQzAAAMiWcAABgSzwAAMCSeAQBgSDwDAMCQeAYAgCHxDAAAQ+IZAACGxDMAAAyJZwAAGBLPAAAwJJ4BAGBIPAMAwJB4BgCAIfEMAABD4hkAAIbEMwAADIlnAAAYEs8AADAkngEAYEg8AwDAkHgGAIAh8QwAAENnjOequrqqPlVVj1TVw1X13mX9l6rqL6rqgeXr+nXPeV9VHa+qL1fVT2znPwAAAHbKrsE2zyT5ue7+QlW9LMn9VXXv8tht3f0f1m9cVa9PclOSH0zy95L8j6r6+919aisHBwCAnXbGI8/d/Xh3f2G5/a0kjyS58gWeckOSj3b3t7v7q0mOJ7lmK4YFAIBVelHnPFfVniRvSPLZZek9VfVgVX2oql6+rF2Z5NF1TzuZDWK7qg5W1bGqOnbq6ade9OAAALDTxvFcVd+b5PeS/Ex3/1WS25N8X5J9SR5P8qvPbrrB0/t5C91Hunt/d++/5KWXv+jBAQBgp43iuaouzVo4/1Z3/36SdPcT3X2qu/8myW/kO6dmnExy9bqnX5Xksa0bGQAAVmPyaRuV5I4kj3T3r61b371us59M8tBy++4kN1XVZVX1uiR7k3xu60YGAIDVmHzaxpuSvDPJF6vqgWXtF5K8o6r2Ze2UjBNJfjpJuvvhqroryZey9kkdt/qkDQAALgRnjOfu/uNsfB7zPS/wnPcnef8m5gIAgHOOKwwCAMCQeAYAgKHJOc/nlD2Hjm64fuLwgR2eBACAi40jzwAAMCSeAQBgSDwDAMCQeAYAgCHxDAAAQ+IZAACGxDMAAAyJZwAAGBLPAAAwJJ4BAGBIPAMAwJB4BgCAIfEMAABD4hkAAIbEMwAADIlnAAAYEs8AADAkngEAYEg8AwDAkHgGAIAh8QwAAEPiGQAAhsQzAAAMiWcAABgSzwAAMLRr1QPwt+05dHTD9ROHD+zwJAAAPJcjzwAAMCSeAQBgSDwDAMCQeAYAgCHxDAAAQ+IZAACGxDMAAAyJZwAAGBLPAAAwJJ4BAGBIPAMAwJB4BgCAIfEMAABD4hkAAIbEMwAADIlnAAAYEs8AADAkngEAYEg8AwDAkHgGAIAh8QwAAEPiGQAAhsQzAAAMiWcAABgSzwAAMCSeAQBgSDwDAMCQeAYAgCHxDAAAQ+IZAACGxDMAAAyJZwAAGBLPAAAwJJ4BAGBIPAMAwJB4BgCAIfEMAABD4hkAAIbEMwAADIlnAAAYEs8AADAkngEAYEg8AwDA0BnjuaqurqpPVdUjVfVwVb13WX9FVd1bVV9Zvr98Wa+q+mBVHa+qB6vqjdv9jwAAgJ0wOfL8TJKf6+4fSHJtklur6vVJDiW5r7v3JrlvuZ8kb0uyd/k6mOT2LZ8aAABW4Izx3N2Pd/cXltvfSvJIkiuT3JDkzmWzO5PcuNy+IclHes1nklxRVbu3fHIAANhhL+qc56rak+QNST6b5LXd/XiyFthJXrNsdmWSR9c97eSyBgAA57VxPFfV9yb5vSQ/091/9UKbbrDWG7zewao6VlXHTj391HQMAABYmV2Tjarq0qyF82919+8vy09U1e7ufnw5LePJZf1kkqvXPf2qJI899zW7+0iSI0ly2e69z4vrc92eQ0eft3bi8IEVTAIAwE6ZfNpGJbkjySPd/WvrHro7yc3L7ZuTfHzd+ruWT924NslTz57eAQAA57PJkec3JXlnki9W1QPL2i8kOZzkrqq6JcnXkrx9eeyeJNcnOZ7k6STv3tKJAQBgRc4Yz939x9n4POYkeesG23eSWzc5FwAAnHNcYRAAAIZGfzB4PtjoD/gSf8QHAMDWceQZAACGxDMAAAyJZwAAGBLPAAAwJJ4BAGBIPAMAwJB4BgCAIfEMAABD4hkAAIbEMwAADIlnAAAYEs8AADAkngEAYEg8AwDA0K5VD3Ax2HPo6IbrJw4f2OFJAADYDEeeAQBgSDwDAMCQeAYAgCHxDAAAQ+IZAACGxDMAAAyJZwAAGBLPAAAwJJ4BAGBIPAMAwJB4BgCAIfEMAABD4hkAAIbEMwAADIlnAAAY2rXqAVZhz6GjG66fOHxghycBAOB84sgzAAAMiWcAABgSzwAAMCSeAQBgSDwDAMCQeAYAgCHxDAAAQ+IZAACGxDMAAAyJZwAAGBLPAAAwtGvVA1xI9hw6uuoRAADYRo48AwDAkHgGAIAhp22skNM8AADOL448AwDAkHgGAIAh8QwAAEPiGQAAhsQzAAAMiWcAABgSzwAAMCSeAQBgSDwDAMCQeAYAgCHxDAAAQ+IZAACGdq16gHPdnkNHVz0CAADnCEeeAQBgSDwDAMCQeAYAgCHxDAAAQ+IZAACGxDMAAAyJZwAAGBLPAAAwJJ4BAGBIPAMAwNAFf3lul9cGAGCrOPIMAABDZ4znqvpQVT1ZVQ+tW/ulqvqLqnpg+bp+3WPvq6rjVfXlqvqJ7RocAAB22uTI84eTXLfB+m3dvW/5uidJqur1SW5K8oPLc369qi7ZqmEBAGCVzhjP3f1HSb4+fL0bkny0u7/d3V9NcjzJNZuYDwAAzhmbOef5PVX14HJax8uXtSuTPLpum5PL2vNU1cGqOlZVx049/dQmxgAAgJ1xtvF8e5LvS7IvyeNJfnVZrw227Y1eoLuPdPf+7t5/yUsvP8sxAABg55zVR9V19xPP3q6q30jyieXuySRXr9v0qiSPnfV0O8zH2gEA8ELO6shzVe1ed/cnkzz7SRx3J7mpqi6rqtcl2Zvkc5sbEQAAzg1nPPJcVb+d5M1JXlVVJ5P8YpI3V9W+rJ2ScSLJTydJdz9cVXcl+VKSZ5Lc2t2ntmd0AADYWWeM5+5+xwbLd7zA9u9P8v7NDAUAAOciVxgEAIAh8QwAAEPiGQAAhsQzAAAMiWcAABgSzwAAMCSeAQBgSDwDAMCQeAYAgCHxDAAAQ+IZAACGxDMAAAyJZwAAGBLPAAAwJJ4BAGBIPAMAwJB4BgCAIfEMAABD4hkAAIZ2rXoAZvYcOvq8tROHD6xgEgCAi5cjzwAAMCSeAQBgSDwDAMCQeAYAgCHxDAAAQ+IZAACGxDMAAAyJZwAAGHKRlPPYRhdOSVw8BQBguzjyDAAAQ+IZAACGxDMAAAyJZwAAGBLPAAAwJJ4BAGBIPAMAwJB4BgCAIfEMAABD4hkAAIbEMwAADIlnAAAYEs8AADAkngEAYEg8AwDAkHgGAIAh8QwAAEPiGQAAhsQzAAAMiWcAABgSzwAAMCSeAQBgSDwDAMCQeAYAgCHxDAAAQ+IZAACGxDMAAAyJZwAAGBLPAAAwJJ4BAGBIPAMAwJB4BgCAIfEMAABD4hkAAIbEMwAADIlnAAAYEs8AADAkngEAYEg8AwDAkHgGAIAh8QwAAEPiGQAAhsQzAAAMnTGeq+pDVfVkVT20bu0VVXVvVX1l+f7yZb2q6oNVdbyqHqyqN27n8AAAsJMmR54/nOS656wdSnJfd+9Nct9yP0nelmTv8nUwye1bMyYAAKzeGeO5u/8oydefs3xDkjuX23cmuXHd+kd6zWeSXFFVu7dqWAAAWKWzPef5td39eJIs31+zrF+Z5NF1251c1gAA4Ly31X8wWBus9YYbVh2sqmNVdezU009t8RgAALD1zjaen3j2dIzl+5PL+skkV6/b7qokj230At19pLv3d/f+S156+VmOAQAAO+ds4/nuJDcvt29O8vF16+9aPnXj2iRPPXt6BwAAnO92nWmDqvrtJG9O8qqqOpnkF5McTnJXVd2S5GtJ3r5sfk+S65McT/J0kndvw8wAALASZ4zn7n7HaR566wbbdpJbNzsUAACci1xhEAAAhsQzAAAMiWcAABgSzwAAMCSeAQBgSDwDAMCQeAYAgCHxDAAAQ+IZAACGxDMAAAyJZwAAGNq16gHYensOHX3e2onDB1YwCQDAhcWRZwAAGBLPAAAwJJ4BAGBIPAMAwJB4BgCAIfEMAABD4hkAAIbEMwAADIlnAAAYEs8AADAkngEAYEg8AwDAkHgGAIAh8QwAAEO7Vj0AO2PPoaMbrp84fGCHJwEAOH858gwAAEPiGQAAhsQzAAAMiWcAABgSzwAAMCSeAQBgSDwDAMCQeAYAgCHxDAAAQ+IZAACGxDMAAAyJZwAAGBLPAAAwJJ4BAGBIPAMAwJB4BgCAIfEMAABD4hkAAIbEMwAADIlnAAAYEs8AADAkngEAYEg8AwDAkHgGAIAh8QwAAEPiGQAAhsQzAAAMiWcAABjateoBOH/sOXR0w/UThw/s8CQAAKvhyDMAAAyJZwAAGBLPAAAwJJ4BAGBIPAMAwJB4BgCAIfEMAABD4hkAAIbEMwAADLnCIJu20ZUHXXUQALgQiWc2dLpLcQMAXMyctgEAAEPiGQAAhsQzAAAMiWcAABgSzwAAMCSeAQBgaFMfVVdVJ5J8K8mpJM909/6qekWS30myJ8mJJP+yu7+xuTEBAGD1tuLI8492977u3r/cP5Tkvu7em+S+5T4AAJz3tuO0jRuS3LncvjPJjdvwMwAAYMdtNp47yR9W1f1VdXBZe213P54ky/fXbPTEqjpYVceq6tipp5/a5BgAALD9Nnt57jd192NV9Zok91bVn02f2N1HkhxJkst27+1NzgEAANtuU0eeu/ux5fuTST6W5JokT1TV7iRZvj+52SEBAOBccNbxXFXfU1Uve/Z2kh9P8lCSu5PcvGx2c5KPb3ZIAAA4F2zmtI3XJvlYVT37Ov+1u/+gqj6f5K6quiXJ15K8ffNjcr7Zc+johusnDh/Y4UkAALbOWcdzd/95kh/eYP1/J3nrZoYCAIBzkSsMAgDAkHgGAIAh8QwAAEPiGQAAhsQzAAAMiWcAABgSzwAAMFTdveoZctnuvb375g+segxWaKOLp7jQCgCw1arq/u7ef7bPd+QZAACGxDMAAAyJZwAAGBLPAAAwJJ4BAGBIPAMAwJB4BgCAoV2rHgCS03+mMwDAucSRZwAAGBLPAAAwJJ4BAGBIPAMAwJB4BgCAIfEMAABD4hkAAIbEMwAADIlnAAAYEs8AADAkngEAYEg8AwDAkHgGAIAh8QwAAEPiGQAAhsQzAAAMiWcAABgSzwAAMCSeAQBgSDwDAMCQeAYAgKFdqx4AXqw9h44+b+3E4QMrmAQAuNg48gwAAEPiGQAAhpy2wUVno9M+Eqd+AABn5sgzAAAMiWcAABgSzwAAMCSeAQBgSDwDAMCQeAYAgCHxDAAAQ+IZAACGxDMAAAyJZwAAGBLPAAAwJJ4BAGBIPAMAwJB4BgCAIfEMAABDu1Y9AJwr9hw6uuH6icMHdngSAOBc5cgzAAAMOfLMBcFRYwBgJzjyDAAAQ+IZAACGqrtXPUMu2723d9/8gVWPAZvmNBEAOLdV1f3dvf9sn+/IMwAADIlnAAAYEs8AADAkngEAYEg8AwDAkHgGAIAhVxiEbXa6qx+ejo+7A4BzlyPPAAAwJJ4BAGDIaRtwjnmxp3k8l9M+AGD7OPIMAABD23bkuaquS/Ifk1yS5De7+/B2/Sw4V2z2qDEAcG7blniuqkuS/Kck/yzJySSfr6q7u/tL2/HzgO84XcC/mNM5tuI1AOBCtF2nbVyT5Hh3/3l3/98kH01ywzb9LAAA2BHV3Vv/olU/leS67v7Xy/13JvmR7n7Pum0OJjm43P2hJA9t+SCc716V5C9XPQTnHPsFG7FfsBH7BRv5B939srN98nad81wbrP2tSu/uI0mOJElVHevu/ds0C+cp+wUbsV+wEfsFG7FfsJGqOraZ52/XaRsnk1y97v5VSR7bpp8FAAA7Yrvi+fNJ9lbV66rqu5LclOTubfpZAACwI7bltI3ufqaq3pPkv2fto+o+1N0Pv8BTjmzHHJz37BdsxH7BRuwXbMR+wUY2tV9syx8MAgDAhcgVBgEAYEg8AwDA0Mrjuaquq6ovV9Xxqjq06nlYnao6UVVfrKoHnv0Ymap6RVXdW1VfWb6/fNVzsr2q6kNV9WRVPbRubcP9oNZ8cHn/eLCq3ri6ydlOp9kvfqmq/mJ5z3igqq5f99j7lv3iy1X1E6uZmu1UVVdX1aeq6pGqeriq3ruse7+4iL3AfrFl7xcrjed1l/F+W5LXJ3lHVb1+lTOxcj/a3fvWfS7noST3dffeJPct97mwfTjJdc9ZO91+8LYke5evg0lu36EZ2XkfzvP3iyS5bXnP2Nfd9yTJ8t+Rm5L84PKcX1/+e8OF5ZkkP9fdP5Dk2iS3Lv/be7+4uJ1uv0i26P1i1UeeXcabM7khyZ3L7TuT3LjCWdgB3f1HSb7+nOXT7Qc3JPlIr/lMkiuqavfOTMpOOs1+cTo3JPlod3+7u7+a5HjW/nvDBaS7H+/uLyy3v5XkkSRXxvvFRe0F9ovTedHvF6uO5yuTPLru/sm88D+QC1sn+cOqun+5fHuSvLa7H0/W/g+R5DUrm45VOt1+4D2E9yy/gv/QutO67BcXmarak+QNST4b7xcsnrNfJFv0frHqeD7jZby5qLypu9+YtV+t3VpV/3TVA3HO8x5ycbs9yfcl2Zfk8SS/uqzbLy4iVfW9SX4vyc9091+90KYbrNkvLlAb7Bdb9n6x6nh2GW/+v+5+bPn+ZJKPZe3XJk88+2u15fuTq5uQFTrdfuA95CLW3U9096nu/pskv5Hv/KrVfnGRqKpLsxZIv9Xdv78se7+4yG20X2zl+8Wq49llvEmSVNX3VNXLnr2d5MeTPJS1/eHmZbObk3x8NROyYqfbD+5O8q7lr+ivTfLUs7+u5cL3nPNVfzJr7xnJ2n5xU1VdVlWvy9ofiH1up+dje1VVJbkjySPd/WvrHvJ+cRE73X6xle8X23J57qmzuIw3F67XJvnY2j6fXUn+a3f/QVV9PsldVXVLkq8lefsKZ2QHVNVvJ3lzkldV1ckkv5jkcDbeD+5Jcn3W/sDj6STv3vGB2RGn2S/eXFX7svYr1hNJfjpJuvvhqroryZey9pf3t3b3qVXMzbZ6U5J3JvliVT2wrP1CvF9c7E63X7xjq94vXJ4bAACGVn3aBgAAnDfEMwAADIlnAAAYEs8AADAkngEAYEg8AwDAkHgGAICh/we6P84rvVfN/QAAAABJRU5ErkJggg==\n",
      "text/plain": [
       "<Figure size 864x864 with 1 Axes>"
      ]
     },
     "metadata": {
      "needs_background": "light"
     },
     "output_type": "display_data"
    },
    {
     "data": {
      "image/png": "iVBORw0KGgoAAAANSUhEUgAAAs8AAAKvCAYAAACVhiLtAAAABHNCSVQICAgIfAhkiAAAAAlwSFlzAAALEgAACxIB0t1+/AAAADh0RVh0U29mdHdhcmUAbWF0cGxvdGxpYiB2ZXJzaW9uMy4xLjMsIGh0dHA6Ly9tYXRwbG90bGliLm9yZy+AADFEAAAd8ElEQVR4nO3dfaxk913f8c+3XuMQSO08y11b2gi2LYEKJ90aS5GqkFBw7Ko2EqkcVYkVuVoqOVIQqMXhH0BqpEUqmEYqlgxO41SUYAFRLOxSXCcRQmoe1sE4dkyUbbKNF1u2aBITZJHKy7d/3LPNxZ71fr33Yfbh9ZKuZuY3Z+b+VjkZv/W7Z86p7g4AAHBqf2fdEwAAgLOFeAYAgCHxDAAAQ+IZAACGxDMAAAyJZwAAGBrHc1VdUFV/UlW/vzx+XVV9uqq+VFW/XVXfsYxftDw+sjy/b2emDgAAu+vFrDy/N8mjmx7/UpJbu3t/kq8nuWkZvynJ17v7e5PcumwHAABnvVE8V9VlSa5N8hvL40ryliS/s2xyZ5Lrl/vXLY+zPP/WZXsAADir7Rlu96tJ/l2Sly2PX5nkG9397PL4WJK9y/29SR5Lku5+tqqeXrb/i81vWFUHkxxMkrrwJf/4wlde9rxf+o/2Xjz+hwAAwKk88MADf9Hdrz7d158ynqvqnyd5qrsfqKo3nxhesWkPnvv2QPftSW5Pkosu3d+X3virz3vR4UPXnmp6AAAwVlX/eyuvn6w8vynJv6iqa5K8JMnfzcZK9CVVtWdZfb4syePL9seSXJ7kWFXtSXJxkq9tZZIAAHAmOOUxz939vu6+rLv3Jbkhyce7+18l+USSn1g2uzHJx5b7dy+Pszz/8e5+3sozAACcbbZynuefTfLTVXUkG8c037GM35Hklcv4Tye5ZWtTBACAM8P0C4NJku7+ZJJPLve/nOTKFdv8dZK3b8PcAADgjOIKgwAAMCSeAQBgSDwDAMCQeAYAgCHxDAAAQ+IZAACGxDMAAAyJZwAAGBLPAAAwJJ4BAGBIPAMAwJB4BgCAIfEMAABD4hkAAIbEMwAADIlnAAAYEs8AADAkngEAYEg8AwDAkHgGAIAh8QwAAEPiGQAAhsQzAAAMiWcAABgSzwAAMCSeAQBgSDwDAMCQeAYAgCHxDAAAQ+IZAACGxDMAAAyJZwAAGBLPAAAwJJ4BAGBIPAMAwJB4BgCAIfEMAABD4hkAAIbEMwAADIlnAAAYEs8AADAkngEAYEg8AwDAkHgGAIAh8QwAAEPiGQAAhsQzAAAMiWcAABgSzwAAMCSeAQBgSDwDAMCQeAYAgCHxDAAAQ+IZAACGxDMAAAyJZwAAGBLPAAAwJJ4BAGBIPAMAwJB4BgCAIfEMAABD4hkAAIbEMwAADIlnAAAYEs8AADAkngEAYEg8AwDAkHgGAIAh8QwAAEPiGQAAhsQzAAAMiWcAABgSzwAAMHTKeK6ql1TVZ6rqT6vqkar6xWX8Q1X1lap6cPm5YhmvqvpAVR2pqoeq6o07/Y8AAIDdsGewzbeSvKW7/6qqLkzyx1X135bn/m13/85ztn9bkv3Lzw8luW25BQCAs9opV557w18tDy9cfvoFXnJdkg8vr/tUkkuq6tKtTxUAANZrdMxzVV1QVQ8meSrJfd396eWp9y+HZtxaVRctY3uTPLbp5ceWsee+58GqOlxVh48/8/QW/gkAALA7RvHc3ce7+4oklyW5sqp+IMn7kvzDJP8kySuS/Oyyea16ixXveXt3H+juAxe89OLTmjwAAOymF3W2je7+RpJPJrm6u59YDs34VpL/nOTKZbNjSS7f9LLLkjy+DXMFAIC1mpxt49VVdcly/zuT/EiSPztxHHNVVZLrkzy8vOTuJO9azrpxVZKnu/uJHZk9AADsosnZNi5NcmdVXZCN2L6ru3+/qj5eVa/OxmEaDyb5N8v29ya5JsmRJM8keff2TxsAAHbfKeO5ux9K8oYV4285yfad5OatTw0AAM4srjAIAABD4hkAAIbEMwAADIlnAAAYEs8AADAkngEAYEg8AwDAkHgGAIAh8QwAAEPiGQAAhsQzAAAMiWcAABgSzwAAMCSeAQBgSDwDAMCQeAYAgCHxDAAAQ+IZAACGxDMAAAyJZwAAGBLPAAAwJJ4BAGBIPAMAwJB4BgCAIfEMAABD4hkAAIbEMwAADIlnAAAYEs8AADAkngEAYEg8AwDAkHgGAIAh8QwAAEPiGQAAhsQzAAAMiWcAABgSzwAAMCSeAQBgSDwDAMCQeAYAgCHxDAAAQ+IZAACGxDMAAAyJZwAAGBLPAAAwJJ4BAGBIPAMAwJB4BgCAIfEMAABD4hkAAIbEMwAADIlnAAAYEs8AADAkngEAYEg8AwDAkHgGAIAh8QwAAEPiGQAAhsQzAAAMiWcAABgSzwAAMCSeAQBgSDwDAMCQeAYAgCHxDAAAQ+IZAACGxDMAAAyJZwAAGBLPAAAwJJ4BAGBIPAMAwJB4BgCAoVPGc1W9pKo+U1V/WlWPVNUvLuOvq6pPV9WXquq3q+o7lvGLlsdHluf37ew/AQAAdsdk5flbSd7S3T+Y5IokV1fVVUl+Kcmt3b0/ydeT3LRsf1OSr3f39ya5ddkOAADOeqeM597wV8vDC5efTvKWJL+zjN+Z5Prl/nXL4yzPv7WqattmDAAAazI65rmqLqiqB5M8leS+JP8ryTe6+9llk2NJ9i739yZ5LEmW559O8srtnDQAAKzDKJ67+3h3X5HksiRXJvm+VZstt6tWmfu5A1V1sKoOV9Xh4888PZ0vAACszYs620Z3fyPJJ5NcleSSqtqzPHVZkseX+8eSXJ4ky/MXJ/naive6vbsPdPeBC1568enNHgAAdtHkbBuvrqpLlvvfmeRHkjya5BNJfmLZ7MYkH1vu3708zvL8x7v7eSvPAABwttlz6k1yaZI7q+qCbMT2Xd39+1X1hSQfqap/n+RPktyxbH9Hkv9SVUeyseJ8ww7MGwAAdt0p47m7H0ryhhXjX87G8c/PHf/rJG/fltkBAMAZxBUGAQBgSDwDAMCQeAYAgCHxDAAAQ+IZAACGxDMAAAyJZwAAGBLPAAAwJJ4BAGBIPAMAwJB4BgCAIfEMAABD4hkAAIbEMwAADIlnAAAYEs8AADAkngEAYEg8AwDAkHgGAIAh8QwAAEPiGQAAhsQzAAAMiWcAABgSzwAAMCSeAQBgSDwDAMCQeAYAgCHxDAAAQ+IZAACGxDMAAAyJZwAAGBLPAAAwJJ4BAGBIPAMAwJB4BgCAIfEMAABD4hkAAIbEMwAADIlnAAAYEs8AADAkngEAYEg8AwDAkHgGAIAh8QwAAEPiGQAAhsQzAAAMiWcAABgSzwAAMCSeAQBgSDwDAMCQeAYAgCHxDAAAQ+IZAACGxDMAAAyJZwAAGBLPAAAwJJ4BAGBIPAMAwJB4BgCAIfEMAABD4hkAAIbEMwAADIlnAAAYEs8AADAkngEAYEg8AwDAkHgGAIAh8QwAAEPiGQAAhsQzAAAMiWcAABgSzwAAMCSeAQBg6JTxXFWXV9UnqurRqnqkqt67jP9CVf15VT24/Fyz6TXvq6ojVfXFqvqxnfwHAADAbtkz2ObZJD/T3Z+rqpcleaCq7lueu7W7/8Pmjavq9UluSPL9Sf5ekv9RVX+/u49v58QBAGC3nXLlubuf6O7PLfe/meTRJHtf4CXXJflId3+ru7+S5EiSK7djsgAAsE4v6pjnqtqX5A1JPr0MvaeqHqqqD1bVy5exvUke2/SyY1kR21V1sKoOV9Xh4888/aInDgAAu20cz1X13Ul+N8lPdfdfJrktyfckuSLJE0l++cSmK17ezxvovr27D3T3gQteevGLnjgAAOy2UTxX1YXZCOff7O7fS5LufrK7j3f33yT59Xz70IxjSS7f9PLLkjy+fVMGAID1mJxto5LckeTR7v6VTeOXbtrsx5M8vNy/O8kNVXVRVb0uyf4kn9m+KQMAwHpMzrbxpiTvTPL5qnpwGfu5JO+oqiuycUjG0SQ/mSTd/UhV3ZXkC9k4U8fNzrQBAMC54JTx3N1/nNXHMd/7Aq95f5L3b2FeAABwxnGFQQAAGBLPAAAwJJ4BAGBIPAMAwJB4BgCAIfEMAABD4hkAAIbEMwAADIlnAAAYEs8AADAkngEAYEg8AwDAkHgGAIAh8QwAAEPiGQAAhsQzAAAMiWcAABgSzwAAMCSeAQBgSDwDAMCQeAYAgCHxDAAAQ+IZAACGxDMAAAyJZwAAGBLPAAAwJJ4BAGBIPAMAwJB4BgCAIfEMAABD4hkAAIbEMwAADIlnAAAYEs8AADAkngEAYGjPuifA37bvlntWjh89dO0uzwQAgOey8gwAAEPiGQAAhsQzAAAMiWcAABgSzwAAMCSeAQBgSDwDAMCQeAYAgCHxDAAAQ+IZAACGxDMAAAyJZwAAGBLPAAAwJJ4BAGBIPAMAwJB4BgCAIfEMAABD4hkAAIbEMwAADIlnAAAYEs8AADAkngEAYEg8AwDAkHgGAIAh8QwAAEPiGQAAhsQzAAAMiWcAABgSzwAAMCSeAQBgSDwDAMCQeAYAgCHxDAAAQ+IZAACGxDMAAAyJZwAAGDplPFfV5VX1iap6tKoeqar3LuOvqKr7qupLy+3Ll/Gqqg9U1ZGqeqiq3rjT/wgAANgNk5XnZ5P8THd/X5KrktxcVa9PckuS+7t7f5L7l8dJ8rYk+5efg0lu2/ZZAwDAGpwynrv7ie7+3HL/m0keTbI3yXVJ7lw2uzPJ9cv965J8uDd8KsklVXXpts8cAAB22Ys65rmq9iV5Q5JPJ3ltdz+RbAR2ktcsm+1N8timlx1bxgAA4Kw2jueq+u4kv5vkp7r7L19o0xVjveL9DlbV4ao6fPyZp6fTAACAtRnFc1VdmI1w/s3u/r1l+MkTh2Mst08t48eSXL7p5Zclefy579ndt3f3ge4+cMFLLz7d+QMAwK6ZnG2jktyR5NHu/pVNT92d5Mbl/o1JPrZp/F3LWTeuSvL0icM7AADgbLZnsM2bkrwzyeer6sFl7OeSHEpyV1XdlOSrSd6+PHdvkmuSHEnyTJJ3b+uMAQBgTU4Zz939x1l9HHOSvHXF9p3k5i3OCwAAzjiuMAgAAEPiGQAAhsQzAAAMiWcAABgSzwAAMCSeAQBgSDwDAMCQeAYAgKHJFQbPavtuued5Y0cPXbuGmQAAcLaz8gwAAEPiGQAAhs75wzZ206pDRBKHiQAAnCusPAMAwJB4BgCAIfEMAABD4hkAAIbEMwAADIlnAAAYEs8AADAkngEAYEg8AwDAkHgGAIChM/ry3Ksud+1S1wAArIuVZwAAGBLPAAAwJJ4BAGBIPAMAwJB4BgCAIfEMAABD4hkAAIbEMwAADIlnAAAYOqOvMHgmW3X1QwAAzm1WngEAYEg8AwDAkMM2dsHJDvE4eujaXZ4JAABbYeUZAACGrDxv4kuAAAC8ECvPAAAwdF6uPFthBgDgdFh5BgCAIfEMAABD4hkAAIbEMwAADIlnAAAYEs8AADAkngEAYEg8AwDAkHgGAIAh8QwAAEPnzOW5XXIbAICdZuUZAACGxDMAAAyJZwAAGBLPAAAwJJ4BAGBIPAMAwJB4BgCAIfEMAABD4hkAAIbEMwAADIlnAAAYEs8AADAkngEAYEg8AwDAkHgGAIAh8QwAAEPiGQAAhvasewIv1r5b7ln3FAAAOE9ZeQYAgCHxDAAAQ+IZAACGxDMAAAydMp6r6oNV9VRVPbxp7Beq6s+r6sHl55pNz72vqo5U1Rer6sd2auIAALDbJivPH0py9YrxW7v7iuXn3iSpqtcnuSHJ9y+v+bWqumC7JgsAAOt0ylPVdfcfVdW+4ftdl+Qj3f2tJF+pqiNJrkzyP097hucwp90DADi7bOWY5/dU1UPLYR0vX8b2Jnls0zbHlrHnqaqDVXW4qg4ff+bpLUwDAAB2x+nG821JvifJFUmeSPLLy3it2LZXvUF3397dB7r7wAUvvfg0pwEAALvntOK5u5/s7uPd/TdJfj0bh2YkGyvNl2/a9LIkj29tigAAcGY4rXiuqks3PfzxJCfOxHF3khuq6qKqel2S/Uk+s7UpAgDAmeGUXxisqt9K8uYkr6qqY0l+Psmbq+qKbByScTTJTyZJdz9SVXcl+UKSZ5Pc3N3Hd2bqAACwuyZn23jHiuE7XmD79yd5/1YmBQAAZyJXGAQAgCHxDAAAQ+IZAACGxDMAAAyJZwAAGBLPAAAwJJ4BAGBIPAMAwJB4BgCAIfEMAABD4hkAAIbEMwAADIlnAAAYEs8AADAkngEAYEg8AwDAkHgGAIAh8QwAAEPiGQAAhsQzAAAMiWcAABgSzwAAMCSeAQBgSDwDAMCQeAYAgCHxDAAAQ+IZAACGxDMAAAyJZwAAGBLPAAAwJJ4BAGBIPAMAwJB4BgCAIfEMAABD4hkAAIbEMwAADIlnAAAYEs8AADC0Z90TYGbfLfc8b+zooWvXMBMAgPOXlWcAABiy8nwWW7UanViRBgDYKVaeAQBgSDwDAMCQeAYAgCHxDAAAQ+IZAACGxDMAAAyJZwAAGBLPAAAwJJ4BAGBIPAMAwJB4BgCAIfEMAABD4hkAAIbEMwAADIlnAAAYEs8AADAkngEAYEg8AwDAkHgGAIAh8QwAAEPiGQAAhsQzAAAMiWcAABgSzwAAMCSeAQBgSDwDAMCQeAYAgCHxDAAAQ+IZAACGxDMAAAyJZwAAGDplPFfVB6vqqap6eNPYK6rqvqr60nL78mW8quoDVXWkqh6qqjfu5OQBAGA3TVaeP5Tk6ueM3ZLk/u7en+T+5XGSvC3J/uXnYJLbtmeaAACwfqeM5+7+oyRfe87wdUnuXO7fmeT6TeMf7g2fSnJJVV26XZMFAIB1Ot1jnl/b3U8kyXL7mmV8b5LHNm13bBkDAICz3nZ/YbBWjPXKDasOVtXhqjp8/Jmnt3kaAACw/U43np88cTjGcvvUMn4syeWbtrssyeOr3qC7b+/uA9194IKXXnya0wAAgN1zuvF8d5Ibl/s3JvnYpvF3LWfduCrJ0ycO7wAAgLPdnlNtUFW/leTNSV5VVceS/HySQ0nuqqqbknw1yduXze9Nck2SI0meSfLuHZgzAACsxSnjubvfcZKn3rpi205y81YnBQAAZyJXGAQAgCHxDAAAQ+IZAACGxDMAAAyJZwAAGBLPAAAwJJ4BAGBIPAMAwJB4BgCAIfEMAABD4hkAAIbEMwAADIlnAAAYEs8AADAkngEAYEg8AwDAkHgGAIAh8QwAAEN71j0Btt++W+553tjRQ9euYSYAAOcWK88AADAkngEAYEg8AwDAkHgGAIAh8QwAAEPiGQAAhsQzAAAMiWcAABgSzwAAMCSeAQBgyOW5zxOrLtmduGw3AMCLYeUZAACGrDyf56xIAwDMWXkGAIAh8QwAAEPiGQAAhsQzAAAMiWcAABgSzwAAMCSeAQBgSDwDAMCQi6Sw0qqLp7hwCgBwvrPyDAAAQ+IZAACGxDMAAAyJZwAAGPKFQcZWfYkw8UVCAOD8YeUZAACGxDMAAAyJZwAAGBLPAAAwJJ4BAGBIPAMAwJB4BgCAIfEMAABD4hkAAIbEMwAADIlnAAAYEs8AADAkngEAYEg8AwDAkHgGAIAh8QwAAEPiGQAAhvasewKc/fbdcs9426OHrt3BmQAA7CwrzwAAMCSeAQBgyGEbnLFOdjiIQz8AgHWx8gwAAEPiGQAAhsQzAAAMiWcAABgSzwAAMCSeAQBgaEunqquqo0m+meR4kme7+0BVvSLJbyfZl+Rokn/Z3V/f2jQBAGD9tmPl+Ye7+4ruPrA8viXJ/d29P8n9y2MAADjr7cRhG9cluXO5f2eS63fgdwAAwK7bajx3kj+sqgeq6uAy9trufiJJltvXrHphVR2sqsNVdfj4M09vcRoAALDztnp57jd19+NV9Zok91XVn01f2N23J7k9SS66dH9vcR4AALDjtrTy3N2PL7dPJflokiuTPFlVlybJcvvUVicJAABngtOO56r6rqp62Yn7SX40ycNJ7k5y47LZjUk+ttVJAgDAmWArh228NslHq+rE+/zX7v6Dqvpskruq6qYkX03y9q1PEwAA1u+047m7v5zkB1eM/58kb93KpAAA4EzkCoMAADAkngEAYEg8AwDAkHgGAIAh8QwAAEPiGQAAhsQzAAAMiWcAABgSzwAAMCSeAQBgSDwDAMCQeAYAgCHxDAAAQ+IZAACGxDMAAAyJZwAAGBLPAAAwtGfdE+D8su+We1aOHz107S7PBADgxbPyDAAAQ+IZAACGxDMAAAyJZwAAGBLPAAAwJJ4BAGBIPAMAwJB4BgCAIfEMAABD4hkAAIbEMwAADIlnAAAY2rPuCcCLte+We543dvTQtWuYCQBwvrHyDAAAQ+IZAACGxDMAAAyJZwAAGBLPAAAwJJ4BAGBIPAMAwJDzPHNGWHXuZgCAM42VZwAAGBLPAAAwJJ4BAGBIPAMAwJB4BgCAIfEMAABD4hkAAIac55lz2qrzRx89dO0aZgIAnAusPAMAwJB4BgCAIfEMAABD4hkAAIZ8YZBzwqovBm7Xe/iCIQBwgpVnAAAYEs8AADAkngEAYEg8AwDAkHgGAIAh8QwAAENOVcd5ZztOawcAnJ+sPAMAwJB4BgCAIYdtwA5z5UIAOHdYeQYAgCHxDAAAQw7bgFNYddjFyQ65cCYPADi3WXkGAIAhK89wGnZ7hdmXDgHgzGDlGQAAhqw8wxlmp1a1X8yx2zv5HgBwNrPyDAAAQ+IZAACGHLYBZ7GtHkbhi4gA8OJYeQYAgKEdW3muqquT/MckFyT5je4+tFO/C85GLqjybb6ICMDZYkfiuaouSPKfkvyzJMeSfLaq7u7uL+zE7wO+bTuifKfeQxADcLbbqcM2rkxypLu/3N3/N8lHkly3Q78LAAB2RXX39r9p1U8kubq7//Xy+J1Jfqi737Npm4NJDi4PfyDJw9s+Ec52r0ryF+ueBGcc+wWr2C9YxX7BKv+gu192ui/eqWOea8XY36r07r49ye1JUlWHu/vADs2Fs5T9glXsF6xiv2AV+wWrVNXhrbx+pw7bOJbk8k2PL0vy+A79LgAA2BU7Fc+fTbK/ql5XVd+R5IYkd+/Q7wIAgF2xI4dtdPezVfWeJP89G6eq+2B3P/ICL7l9J+bBWc9+wSr2C1axX7CK/YJVtrRf7MgXBgEA4FzkCoMAADAkngEAYGjt8VxVV1fVF6vqSFXdsu75sD5VdbSqPl9VD544jUxVvaKq7quqLy23L1/3PNlZVfXBqnqqqh7eNLZyP6gNH1g+Px6qqjeub+bspJPsF79QVX++fGY8WFXXbHrufct+8cWq+rH1zJqdVFWXV9UnqurRqnqkqt67jPu8OI+9wH6xbZ8Xa43nTZfxfluS1yd5R1W9fp1zYu1+uLuv2HRezluS3N/d+5Pcvzzm3PahJFc/Z+xk+8Hbkuxffg4muW2X5sju+1Cev18kya3LZ8YV3X1vkiz/Hbkhyfcvr/m15b83nFueTfIz3f19Sa5KcvPyv73Pi/PbyfaLZJs+L9a98uwy3pzKdUnuXO7fmeT6Nc6FXdDdf5Tka88ZPtl+cF2SD/eGTyW5pKou3Z2ZsptOsl+czHVJPtLd3+ruryQ5ko3/3nAO6e4nuvtzy/1vJnk0yd74vDivvcB+cTIv+vNi3fG8N8ljmx4fywv/Azm3dZI/rKoHlsu3J8lru/uJZOP/EEles7bZsU4n2w98hvCe5U/wH9x0WJf94jxTVfuSvCHJp+PzgsVz9otkmz4v1h3Pp7yMN+eVN3X3G7Pxp7Wbq+qfrntCnPF8hpzfbkvyPUmuSPJEkl9exu0X55Gq+u4kv5vkp7r7L19o0xVj9otz1Ir9Yts+L9Ydzy7jzf/X3Y8vt08l+Wg2/mzy5Ik/qy23T61vhqzRyfYDnyHnse5+sruPd/ffJPn1fPtPrfaL80RVXZiNQPrN7v69ZdjnxXlu1X6xnZ8X645nl/EmSVJV31VVLztxP8mPJnk4G/vDjctmNyb52HpmyJqdbD+4O8m7lm/RX5Xk6RN/ruXc95zjVX88G58ZycZ+cUNVXVRVr8vGF8Q+s9vzY2dVVSW5I8mj3f0rm57yeXEeO9l+sZ2fFztyee6p07iMN+eu1yb56MY+nz1J/mt3/0FVfTbJXVV1U5KvJnn7GufILqiq30ry5iSvqqpjSX4+yaGs3g/uTXJNNr7g8UySd+/6hNkVJ9kv3lxVV2TjT6xHk/xkknT3I1V1V5IvZOOb9zd39/F1zJsd9aYk70zy+ap6cBn7ufi8ON+dbL94x3Z9Xrg8NwAADK37sA0AADhriGcAABgSzwAAMCSeAQBgSDwDAMCQeAYAgCHxDAAAQ/8PERPW7RUMc1sAAAAASUVORK5CYII=\n",
      "text/plain": [
       "<Figure size 864x864 with 1 Axes>"
      ]
     },
     "metadata": {
      "needs_background": "light"
     },
     "output_type": "display_data"
    },
    {
     "data": {
      "image/png": "iVBORw0KGgoAAAANSUhEUgAAAs8AAAKvCAYAAACVhiLtAAAABHNCSVQICAgIfAhkiAAAAAlwSFlzAAALEgAACxIB0t1+/AAAADh0RVh0U29mdHdhcmUAbWF0cGxvdGxpYiB2ZXJzaW9uMy4xLjMsIGh0dHA6Ly9tYXRwbG90bGliLm9yZy+AADFEAAAd8ElEQVR4nO3dbaxl51nf4f/dGeMQCHbe5dqWJoJpS6DCSafGUqQqJBQcG9VBIpWjKrEiV0MlRwoiapnwBZAaaZAKppFKJIPTOBUQLCCKhVNK6iRCfMjLJJjEjokyTabxYCsWTWKCLFJ5uPvhrGkO9h6f23Ne9rxcl3R09n722vs8R17e89Nz1l6rujsAAMDW/sG6JwAAAOcL8QwAAEPiGQAAhsQzAAAMiWcAABgSzwAAMDSO56raV1V/VlV/uNx/WVV9oqq+WFW/W1XfsYxfutw/vjx+YHemDgAAe+vZrDy/LclDm+7/cpLbu/tgkq8nuXUZvzXJ17v7+5LcvmwHAADnvVE8V9VVSW5M8pvL/UrymiS/t2xyV5LXL7dvWu5nefy1y/YAAHBe2z/c7teS/Ickz1vuvzDJN7r7yeX+ySRXLrevTPJwknT3k1X1+LL9X21+wao6nORwktQlz/lnl7zwqqf90H965WXjXwQAALby6U9/+q+6+8Vn+/wt47mqfiLJY9396ap69enhFZv24LFvD3TfkeSOJLn0ioN9xS2/9rQnHTt641bTAwCAsar639t5/mTl+VVJ/lVV3ZDkOUm+Jxsr0ZdX1f5l9fmqJI8s259McnWSk1W1P8llSb62nUkCAMC5YMtjnrv7Hd19VXcfSHJzko90979J8tEkP7VsdkuSDy6371nuZ3n8I939tJVnAAA432znPM8/l+Rnq+p4No5pvnMZvzPJC5fxn01yZHtTBACAc8P0A4NJku7+WJKPLbe/lOTaFdv8bZI37MDcAADgnOIKgwAAMCSeAQBgSDwDAMCQeAYAgCHxDAAAQ+IZAACGxDMAAAyJZwAAGBLPAAAwJJ4BAGBIPAMAwJB4BgCAIfEMAABD4hkAAIbEMwAADIlnAAAYEs8AADAkngEAYEg8AwDAkHgGAIAh8QwAAEPiGQAAhsQzAAAMiWcAABgSzwAAMCSeAQBgSDwDAMCQeAYAgCHxDAAAQ+IZAACGxDMAAAyJZwAAGBLPAAAwJJ4BAGBIPAMAwJB4BgCAIfEMAABD4hkAAIbEMwAADIlnAAAYEs8AADAkngEAYEg8AwDAkHgGAIAh8QwAAEPiGQAAhsQzAAAMiWcAABgSzwAAMCSeAQBgSDwDAMCQeAYAgCHxDAAAQ+IZAACGxDMAAAyJZwAAGBLPAAAwJJ4BAGBIPAMAwJB4BgCAIfEMAABD4hkAAIbEMwAADIlnAAAYEs8AADAkngEAYEg8AwDAkHgGAIAh8QwAAEPiGQAAhsQzAAAMiWcAABgSzwAAMLRlPFfVc6rqk1X151X1YFX90jL+3qr6clXdv3xds4xXVb2rqo5X1Wer6pW7/UsAAMBe2D/Y5ltJXtPdf1NVlyT506r678tj/767f+8p278uycHl64eTvHv5DgAA57UtV557w98sdy9ZvvoZnnJTkvctz/t4ksur6ortTxUAANZrdMxzVe2rqvuTPJbkw939ieWhdy6HZtxeVZcuY1cmeXjT008uY099zcNVdayqjp164vFt/AoAALA3RvHc3ae6+5okVyW5tqp+MMk7kvyTJP88yQuS/Nyyea16iRWveUd3H+ruQ/uee9lZTR4AAPbSszrbRnd/I8nHklzf3Y8uh2Z8K8l/TXLtstnJJFdvetpVSR7ZgbkCAMBaTc628eKquny5/Z1JfjTJX5w+jrmqKsnrkzywPOWeJG9ezrpxXZLHu/vRXZk9AADsocnZNq5IcldV7ctGbN/d3X9YVR+pqhdn4zCN+5P8u2X7DyW5IcnxJE8kecvOTxsAAPbelvHc3Z9N8ooV4685w/ad5LbtTw0AAM4trjAIAABD4hkAAIbEMwAADIlnAAAYEs8AADAkngEAYEg8AwDA0OQiKWtz4Mi9Txs7cfTGNcwEAACsPAMAwJh4BgCAIfEMAABD4hkAAIbEMwAADIlnAAAYEs8AADAkngEAYEg8AwDAkHgGAIAh8QwAAEPiGQAAhsQzAAAMiWcAABgSzwAAMCSeAQBgSDwDAMCQeAYAgCHxDAAAQ+IZAACGxDMAAAyJZwAAGBLPAAAwJJ4BAGBIPAMAwJB4BgCAIfEMAABD4hkAAIbEMwAADIlnAAAYEs8AADAkngEAYEg8AwDAkHgGAIAh8QwAAEPiGQAAhsQzAAAMiWcAABgSzwAAMCSeAQBgSDwDAMCQeAYAgCHxDAAAQ+IZAACGxDMAAAyJZwAAGBLPAAAwJJ4BAGBIPAMAwJB4BgCAIfEMAABD4hkAAIbEMwAADIlnAAAYEs8AADAkngEAYEg8AwDAkHgGAIAh8QwAAEPiGQAAhsQzAAAMiWcAABgSzwAAMCSeAQBgaMt4rqrnVNUnq+rPq+rBqvqlZfxlVfWJqvpiVf1uVX3HMn7pcv/48viB3f0VAABgb0xWnr+V5DXd/UNJrklyfVVdl+SXk9ze3QeTfD3Jrcv2tyb5end/X5Lbl+0AAOC8t2U894a/We5esnx1ktck+b1l/K4kr19u37Tcz/L4a6uqdmzGAACwJqNjnqtqX1Xdn+SxJB9O8r+SfKO7n1w2OZnkyuX2lUkeTpLl8ceTvHAnJw0AAOswiufuPtXd1yS5Ksm1Sb5/1WbL91WrzP3Ugao6XFXHqurYqScen84XAADW5lmdbaO7v5HkY0muS3J5Ve1fHroqySPL7ZNJrk6S5fHLknxtxWvd0d2HuvvQvudednazBwCAPTQ528aLq+ry5fZ3JvnRJA8l+WiSn1o2uyXJB5fb9yz3szz+ke5+2sozAACcb/ZvvUmuSHJXVe3LRmzf3d1/WFWfT/L+qvqPSf4syZ3L9ncm+W9VdTwbK84378K8AQBgz20Zz9392SSvWDH+pWwc//zU8b9N8oYdmR0AAJxDXGEQAACGxDMAAAyJZwAAGBLPAAAwJJ4BAGBIPAMAwJB4BgCAIfEMAABD4hkAAIbEMwAADIlnAAAYEs8AADAkngEAYEg8AwDAkHgGAIAh8QwAAEPiGQAAhsQzAAAMiWcAABgSzwAAMCSeAQBgSDwDAMCQeAYAgCHxDAAAQ+IZAACGxDMAAAyJZwAAGBLPAAAwJJ4BAGBIPAMAwJB4BgCAIfEMAABD4hkAAIbEMwAADIlnAAAYEs8AADAkngEAYEg8AwDAkHgGAIAh8QwAAEPiGQAAhsQzAAAMiWcAABgSzwAAMCSeAQBgSDwDAMCQeAYAgCHxDAAAQ+IZAACGxDMAAAyJZwAAGBLPAAAwJJ4BAGBIPAMAwJB4BgCAIfEMAABD4hkAAIbEMwAADIlnAAAYEs8AADAkngEAYEg8AwDAkHgGAIAh8QwAAEPiGQAAhsQzAAAMiWcAABgSzwAAMCSeAQBgSDwDAMCQeAYAgCHxDAAAQ+IZAACGtoznqrq6qj5aVQ9V1YNV9bZl/Ber6i+r6v7l64ZNz3lHVR2vqi9U1Y/v5i8AAAB7Zf9gmyeTvL27P1NVz0vy6ar68PLY7d39nzZvXFUvT3Jzkh9I8g+T/M+q+kfdfWonJw4AAHtty5Xn7n60uz+z3P5mkoeSXPkMT7kpyfu7+1vd/eUkx5NcuxOTBQCAdXpWxzxX1YEkr0jyiWXorVX12ap6T1U9fxm7MsnDm552Mitiu6oOV9Wxqjp26onHn/XEAQBgr43juaq+O8nvJ/mZ7v7rJO9O8r1JrknyaJJfOb3piqf30wa67+juQ919aN9zL3vWEwcAgL02iuequiQb4fxb3f0HSdLdX+3uU939d0l+I98+NONkkqs3Pf2qJI/s3JQBAGA9JmfbqCR3Jnmou3910/gVmzb7ySQPLLfvSXJzVV1aVS9LcjDJJ3duygAAsB6Ts228Ksmbknyuqu5fxn4+yRur6ppsHJJxIslPJ0l3P1hVdyf5fDbO1HGbM20AAHAh2DKeu/tPs/o45g89w3PemeSd25gXAACcc1xhEAAAhsQzAAAMiWcAABgSzwAAMCSeAQBgSDwDAMCQeAYAgCHxDAAAQ+IZAACGxDMAAAyJZwAAGBLPAAAwJJ4BAGBIPAMAwJB4BgCAIfEMAABD4hkAAIbEMwAADIlnAAAYEs8AADAkngEAYEg8AwDAkHgGAIAh8QwAAEPiGQAAhvavewLP1oEj964cP3H0xj2eCQAAFxsrzwAAMCSeAQBgSDwDAMCQeAYAgCHxDAAAQ+IZAACGxDMAAAyJZwAAGBLPAAAwJJ4BAGBIPAMAwJB4BgCAIfEMAABD4hkAAIbEMwAADIlnAAAYEs8AADAkngEAYEg8AwDAkHgGAIAh8QwAAEPiGQAAhvavewL8fQeO3Lty/MTRG/d4JgAAPJWVZwAAGBLPAAAwJJ4BAGBIPAMAwJB4BgCAIfEMAABD4hkAAIbEMwAADIlnAAAYEs8AADAkngEAYEg8AwDAkHgGAIAh8QwAAEPiGQAAhsQzAAAMiWcAABgSzwAAMCSeAQBgSDwDAMCQeAYAgCHxDAAAQ+IZAACGtoznqrq6qj5aVQ9V1YNV9bZl/AVV9eGq+uLy/fnLeFXVu6rqeFV9tqpeudu/BAAA7IXJyvOTSd7e3d+f5Lokt1XVy5McSXJfdx9Mct9yP0lel+Tg8nU4ybt3fNYAALAGW8Zzdz/a3Z9Zbn8zyUNJrkxyU5K7ls3uSvL65fZNSd7XGz6e5PKqumLHZw4AAHvsWR3zXFUHkrwiySeSvLS7H002AjvJS5bNrkzy8KannVzGAADgvDaO56r67iS/n+Rnuvuvn2nTFWO94vUOV9Wxqjp26onHp9MAAIC1GcVzVV2SjXD+re7+g2X4q6cPx1i+P7aMn0xy9aanX5Xkkae+Znff0d2HuvvQvudedrbzBwCAPTM520YluTPJQ939q5seuifJLcvtW5J8cNP4m5ezblyX5PHTh3cAAMD5bP9gm1cleVOSz1XV/cvYzyc5muTuqro1yVeSvGF57ENJbkhyPMkTSd6yozMGAIA12TKeu/tPs/o45iR57YrtO8lt25wXAACcc1xhEAAAhsQzAAAMiWcAABgSzwAAMCSeAQBgSDwDAMCQeAYAgCHxDAAAQ+IZAACGxDMAAAyJZwAAGNq/7gmcrw4cufdpYyeO3riGmQAAsFesPAMAwJB4BgCAIfEMAABD4hkAAIbEMwAADIlnAAAYEs8AADB0wZznedV5lxPnXgYAYOdYeQYAgCHxDAAAQ+IZAACGxDMAAAyJZwAAGBLPAAAwJJ4BAGBIPAMAwJB4BgCAIfEMAABD4hkAAIbEMwAADO1f9wQuBgeO3Lty/MTRG/d4JgAAbIeVZwAAGLLyvIPOtMK8U9sDALBeVp4BAGBIPAMAwJB4BgCAIfEMAABD4hkAAIbEMwAADIlnAAAYcp7nLTgXMwAAp1l5BgCAIfEMAABD4hkAAIbEMwAADIlnAAAYEs8AADAkngEAYEg8AwDAkHgGAIAh8QwAAEPiGQAAhsQzAAAMiWcAABgSzwAAMCSeAQBgSDwDAMCQeAYAgCHxDAAAQ+IZAACGxDMAAAyJZwAAGBLPAAAwJJ4BAGBIPAMAwJB4BgCAof3rnsBuO3Dk3qeNnTh64xpmAgDA+c7KMwAADIlnAAAYEs8AADAkngEAYGjLeK6q91TVY1X1wKaxX6yqv6yq+5evGzY99o6qOl5VX6iqH9+tiQMAwF6brDy/N8n1K8Zv7+5rlq8PJUlVvTzJzUl+YHnOr1fVvp2aLAAArNOW8dzdf5Lka8PXuynJ+7v7W9395STHk1y7jfkBAMA5YzvneX5rVb05ybEkb+/urye5MsnHN21zchl7mqo6nORwkuz7nhdvYxo7Z9U5oQEA4LSz/cDgu5N8b5Jrkjya5FeW8Vqxba96ge6+o7sPdfehfc+97CynAQAAe+es4rm7v9rdp7r775L8Rr59aMbJJFdv2vSqJI9sb4oAAHBuOKt4rqorNt39ySSnz8RxT5Kbq+rSqnpZkoNJPrm9KQIAwLlhy2Oeq+p3krw6yYuq6mSSX0jy6qq6JhuHZJxI8tNJ0t0PVtXdST6f5Mkkt3X3qd2ZOgAA7K0t47m737hi+M5n2P6dSd65nUkBAMC5yBUGAQBgSDwDAMCQeAYAgCHxDAAAQ9u5wuB5y5UEAQA4G1aeAQBgSDwDAMCQeAYAgCHxDAAAQ+IZAACGxDMAAAyJZwAAGBLPAAAwJJ4BAGBIPAMAwJB4BgCAIfEMAABD4hkAAIbEMwAADIlnAAAYEs8AADAkngEAYEg8AwDAkHgGAIAh8QwAAEPiGQAAhsQzAAAMiWcAABgSzwAAMCSeAQBgSDwDAMCQeAYAgCHxDAAAQ+IZAACGxDMAAAyJZwAAGBLPAAAwJJ4BAGBIPAMAwJB4BgCAIfEMAABD4hkAAIbEMwAADIlnAAAYEs8AADAkngEAYEg8AwDAkHgGAIAh8QwAAEPiGQAAhsQzAAAM7V/3BJg5cOTep42dOHrjGmYCAHDxsvIMAABD4hkAAIbEMwAADIlnAAAYEs8AADAkngEAYEg8AwDAkHgGAIAh8QwAAEPiGQAAhsQzAAAMiWcAABgSzwAAMCSeAQBgSDwDAMCQeAYAgCHxDAAAQ+IZAACGxDMAAAyJZwAAGNoynqvqPVX1WFU9sGnsBVX14ar64vL9+ct4VdW7qup4VX22ql65m5MHAIC9NFl5fm+S658ydiTJfd19MMl9y/0keV2Sg8vX4STv3plpAgDA+m0Zz939J0m+9pThm5Lctdy+K8nrN42/rzd8PMnlVXXFTk0WAADW6WyPeX5pdz+aJMv3lyzjVyZ5eNN2J5cxAAA47+30BwZrxViv3LDqcFUdq6pjp554fIenAQAAO+9s4/mrpw/HWL4/toyfTHL1pu2uSvLIqhfo7ju6+1B3H9r33MvOchoAALB3zjae70lyy3L7liQf3DT+5uWsG9clefz04R0AAHC+27/VBlX1O0leneRFVXUyyS8kOZrk7qq6NclXkrxh2fxDSW5IcjzJE0nesgtzBgCAtdgynrv7jWd46LUrtu0kt213UgAAcC5yhUEAABgSzwAAMCSeAQBgSDwDAMCQeAYAgCHxDAAAQ+IZAACGxDMAAAxteZEULgwHjty7cvzE0Rv3eCYAAOcvK88AADAkngEAYEg8AwDAkHgGAIAhHxg8j/kQIADA3rLyDAAAQ+IZAACGxDMAAAyJZwAAGBLPAAAwJJ4BAGBIPAMAwJB4BgCAIfEMAABD4hkAAIZcnpuVVl3622W/AYCLnZVnAAAYEs8AADAkngEAYEg8AwDAkHgGAIAh8QwAAEPiGQAAhsQzAAAMiWcAABhyhcEL0KqrA+7EtgAAFzvxzNiZQttluwGAi4XDNgAAYEg8AwDAkHgGAIAh8QwAAEPiGQAAhsQzAAAMiWcAABgSzwAAMCSeAQBgSDwDAMCQeAYAgCHxDAAAQ+IZAACGxDMAAAyJZwAAGBLPAAAwJJ4BAGBIPAMAwJB4BgCAIfEMAABD4hkAAIbEMwAADO1f9wQ4/x04cu/Txk4cvXENMwEA2F1WngEAYMjKM7ti1Wp0YkUaADi/WXkGAIAhK8+cs6xeAwDnGivPAAAwJJ4BAGBIPAMAwJB4BgCAIfEMAABD4hkAAIbEMwAADIlnAAAYEs8AADAkngEAYGhbl+euqhNJvpnkVJInu/tQVb0gye8mOZDkRJJ/3d1f3940uVC45DYAcD7biZXnH+nua7r70HL/SJL7uvtgkvuW+wAAcN7bjcM2bkpy13L7riSv34WfAQAAe2678dxJ/riqPl1Vh5exl3b3o0myfH/JqidW1eGqOlZVx0498fg2pwEAALtvW8c8J3lVdz9SVS9J8uGq+ovpE7v7jiR3JMmlVxzsbc4DAAB23bbiubsfWb4/VlUfSHJtkq9W1RXd/WhVXZHksR2YJxe4M32QEADgXHLWh21U1XdV1fNO307yY0keSHJPkluWzW5J8sHtThIAAM4F21l5fmmSD1TV6df57e7+o6r6VJK7q+rWJF9J8obtTxMAANbvrOO5u7+U5IdWjP+fJK/dzqQAAOBc5AqDAAAwJJ4BAGBIPAMAwJB4BgCAIfEMAABD4hkAAIbEMwAADIlnAAAYEs8AADAkngEAYEg8AwDAkHgGAIAh8QwAAEPiGQAAhsQzAAAMiWcAABgSzwAAMCSeAQBgSDwDAMCQeAYAgCHxDAAAQ+IZAACGxDMAAAyJZwAAGBLPAAAwJJ4BAGBIPAMAwND+dU8AdsKBI/euHD9x9MY9ngkAcCGz8gwAAEPiGQAAhsQzAAAMiWcAABgSzwAAMCSeAQBgSDwDAMCQeAYAgCHxDAAAQ+IZAACGXJ6b886ZLsUNALDbrDwDAMCQeAYAgCHxDAAAQ+IZAACGfGCQC9qqDxeeOHrjGmYCAFwIrDwDAMCQeAYAgCHxDAAAQ+IZAACGxDMAAAyJZwAAGBLPAAAw5DzPsFh1TujEeaEBgG+z8gwAAEPiGQAAhsQzAAAMOeaZi86Zjm3erdd2zDQAXDisPAMAwJB4BgCAIYdtwBYcigEAnCae4Szs5nHTAMC5y2EbAAAwZOUZdpkrFwLAhcPKMwAADFl5hjWxIg0A5x8rzwAAMCSeAQBgSDwDAMCQeAYAgCHxDAAAQ862AecBZ+YAgHODlWcAABiy8gznmDOtMgMA62flGQAAhnZt5bmqrk/yn5PsS/Kb3X10t34WXKxWrVI7DhoAds+uxHNV7UvyX5L8yyQnk3yqqu7p7s/vxs8Dzo4PIgLAs7Nbh21cm+R4d3+pu/9vkvcnuWmXfhYAAOyJ6u6df9Gqn0pyfXf/2+X+m5L8cHe/ddM2h5McXu7+YJIHdnwinO9elOSv1j0Jzjn2C1axX7CK/YJV/nF3P+9sn7xbxzzXirG/V+ndfUeSO5Kkqo5196FdmgvnKfsFq9gvWMV+wSr2C1apqmPbef5uHbZxMsnVm+5fleSRXfpZAACwJ3Yrnj+V5GBVvayqviPJzUnu2aWfBQAAe2JXDtvo7ier6q1J/kc2TlX3nu5+8BmecsduzIPznv2CVewXrGK/YBX7Batsa7/YlQ8MAgDAhcgVBgEAYEg8AwDA0Nrjuaqur6ovVNXxqjqy7vmwPlV1oqo+V1X3nz6NTFW9oKo+XFVfXL4/f93zZHdV1Xuq6rGqemDT2Mr9oDa8a3n/+GxVvXJ9M2c3nWG/+MWq+svlPeP+qrph02PvWPaLL1TVj69n1uymqrq6qj5aVQ9V1YNV9bZl3PvFRewZ9osde79Yazxvuoz365K8PMkbq+rl65wTa/cj3X3NpvNyHklyX3cfTHLfcp8L23uTXP+UsTPtB69LcnD5Opzk3Xs0R/bee/P0/SJJbl/eM67p7g8lyfLvyM1JfmB5zq8v/95wYXkyydu7+/uTXJfktuW/vfeLi9uZ9otkh94v1r3y7DLebOWmJHctt+9K8vo1zoU90N1/kuRrTxk+035wU5L39YaPJ7m8qq7Ym5myl86wX5zJTUne393f6u4vJzmejX9vuIB096Pd/Znl9jeTPJTkyni/uKg9w35xJs/6/WLd8Xxlkoc33T+ZZ/4FubB1kj+uqk8vl29Pkpd296PJxv8QSV6yttmxTmfaD7yH8NblT/Dv2XRYl/3iIlNVB5K8Iskn4v2CxVP2i2SH3i/WHc9bXsabi8qruvuV2fjT2m1V9S/WPSHOed5DLm7vTvK9Sa5J8miSX1nG7RcXkar67iS/n+Rnuvuvn2nTFWP2iwvUiv1ix94v1h3PLuPN/9fdjyzfH0vygWz82eSrp/+stnx/bH0zZI3OtB94D7mIdfdXu/tUd/9dkt/It//Uar+4SFTVJdkIpN/q7j9Yhr1fXORW7Rc7+X6x7nh2GW+SJFX1XVX1vNO3k/xYkgeysT/csmx2S5IPrmeGrNmZ9oN7krx5+RT9dUkeP/3nWi58Tzle9Sez8Z6RbOwXN1fVpVX1smx8QOyTez0/dldVVZI7kzzU3b+66SHvFxexM+0XO/l+sSuX5546i8t4c+F6aZIPbOzz2Z/kt7v7j6rqU0nurqpbk3wlyRvWOEf2QFX9TpJXJ3lRVZ1M8gtJjmb1fvChJDdk4wMeTyR5y55PmD1xhv3i1VV1TTb+xHoiyU8nSXc/WFV3J/l8Nj55f1t3n1rHvNlVr0rypiSfq6r7l7Gfj/eLi92Z9os37tT7hctzAwDA0LoP2wAAgPOGeAYAgCHxDAAAQ+IZAACGxDMAAAyJZwAAGBLPAAAw9P8AY+LW3j80SZsAAAAASUVORK5CYII=\n",
      "text/plain": [
       "<Figure size 864x864 with 1 Axes>"
      ]
     },
     "metadata": {
      "needs_background": "light"
     },
     "output_type": "display_data"
    },
    {
     "data": {
      "image/png": "iVBORw0KGgoAAAANSUhEUgAAAs8AAAKvCAYAAACVhiLtAAAABHNCSVQICAgIfAhkiAAAAAlwSFlzAAALEgAACxIB0t1+/AAAADh0RVh0U29mdHdhcmUAbWF0cGxvdGxpYiB2ZXJzaW9uMy4xLjMsIGh0dHA6Ly9tYXRwbG90bGliLm9yZy+AADFEAAAeEElEQVR4nO3dbaxl51nf4f/dGeMQCHbe5dqWJoJpS6DCSafGUqQqJBQcT1UHiVSOqsSKXA2VHCkI1DLhCyA10iAVTCOVqAanMRUQLCCKhVNK6iRCfMjLJBjHjokyTabxYCsWTWKCLFLZ3P1w1jQHe4/P7Tkve16uSzo6ez97rX2eIy/v+ek5a+9V3R0AAGBrf2/dEwAAgPOFeAYAgCHxDAAAQ+IZAACGxDMAAAyJZwAAGBrHc1Xtq6o/rao/WO6/oqo+UVVfqKrfqapvW8YvXe6fWB4/sDtTBwCAvfVcVp7fkeShTfd/Mclt3X0wydeS3LKM35Lka939PUluW7YDAIDz3iieq+qqJIeT/Ppyv5K8LsnvLpvcmeSNy+0bl/tZHn/9sj0AAJzX9g+3+5Uk/z7JC5b7L07y9e5+crl/KsmVy+0rkzycJN39ZFU9vmz/l5ufsKqOJDmSJHXJ8/7JJS++6hk/9B9fedn4FwEAgK18+tOf/svufunZ7r9lPFfVv0jyWHd/uqpee3p4xaY9eOxbA923J7k9SS694mBfcfOvPGOn48cObzU9AAAYq6r/vZ39JyvPr0nyL6vqhiTPS/Jd2ViJvryq9i+rz1cleWTZ/lSSq5Ocqqr9SS5L8tXtTBIAAM4FW57z3N3v7O6ruvtAkpuSfKS7/3WSjyb58WWzm5N8cLl993I/y+Mf6e5nrDwDAMD5Zjuf8/wzSX6qqk5k45zmO5bxO5K8eBn/qSRHtzdFAAA4N0zfMJgk6e6PJfnYcvuLSa5dsc3fJHnTDswNAADOKa4wCAAAQ+IZAACGxDMAAAyJZwAAGBLPAAAwJJ4BAGBIPAMAwJB4BgCAIfEMAABD4hkAAIbEMwAADIlnAAAYEs8AADAkngEAYEg8AwDAkHgGAIAh8QwAAEPiGQAAhsQzAAAMiWcAABgSzwAAMCSeAQBgSDwDAMCQeAYAgCHxDAAAQ+IZAACGxDMAAAyJZwAAGBLPAAAwJJ4BAGBIPAMAwJB4BgCAIfEMAABD4hkAAIbEMwAADIlnAAAYEs8AADAkngEAYEg8AwDAkHgGAIAh8QwAAEPiGQAAhsQzAAAMiWcAABgSzwAAMCSeAQBgSDwDAMCQeAYAgKH9657Aszlw9J5njJ08dngNMwEAACvPAAAwJp4BAGBIPAMAwJB4BgCAIfEMAABD4hkAAIbEMwAADIlnAAAYEs8AADAkngEAYEg8AwDAkHgGAIAh8QwAAEPiGQAAhsQzAAAMiWcAABgSzwAAMCSeAQBgSDwDAMCQeAYAgCHxDAAAQ+IZAACGxDMAAAyJZwAAGNoynqvqeVX1yar6s6p6sKp+YRl/X1V9qaruW76uWcarqt5dVSeq6v6qevVu/xIAALAX9g+2+WaS13X3X1fVJUn+pKr++/LYv+vu333a9m9IcnD5+sEk71m+AwDAeW3Llefe8NfL3UuWr36WXW5M8hvLfh9PcnlVXbH9qQIAwHqNznmuqn1VdV+Sx5J8uLs/sTz0ruXUjNuq6tJl7MokD2/a/dQy9vTnPFJVx6vq+FNPPL6NXwEAAPbGKJ67+6nuvibJVUmurarvT/LOJP8oyT9N8qIkP7NsXqueYsVz3t7dh7r70L7nX3ZWkwcAgL30nD5to7u/nuRjSa7v7keXUzO+meS/Jrl22exUkqs37XZVkkd2YK4AALBWk0/beGlVXb7c/vYkP5zkz0+fx1xVleSNSR5Ydrk7yVuXT924Lsnj3f3orsweAAD20OTTNq5IcmdV7ctGbN/V3X9QVR+pqpdm4zSN+5L822X7DyW5IcmJJE8kedvOTxsAAPbelvHc3fcnedWK8dedYftOcuv2pwYAAOcWVxgEAIAh8QwAAEPiGQAAhsQzAAAMiWcAABgSzwAAMCSeAQBgSDwDAMCQeAYAgCHxDAAAQ+IZAACGxDMAAAyJZwAAGBLPAAAwJJ4BAGBIPAMAwJB4BgCAIfEMAABD4hkAAIbEMwAADIlnAAAYEs8AADAkngEAYEg8AwDAkHgGAIAh8QwAAEPiGQAAhsQzAAAMiWcAABgSzwAAMCSeAQBgSDwDAMCQeAYAgCHxDAAAQ+IZAACGxDMAAAyJZwAAGBLPAAAwJJ4BAGBIPAMAwJB4BgCAIfEMAABD4hkAAIbEMwAADIlnAAAYEs8AADAkngEAYEg8AwDAkHgGAIAh8QwAAEPiGQAAhsQzAAAMiWcAABgSzwAAMCSeAQBgSDwDAMCQeAYAgCHxDAAAQ+IZAACGxDMAAAyJZwAAGBLPAAAwJJ4BAGBIPAMAwJB4BgCAIfEMAABD4hkAAIbEMwAADIlnAAAYEs8AADAkngEAYEg8AwDA0JbxXFXPq6pPVtWfVdWDVfULy/grquoTVfWFqvqdqvq2ZfzS5f6J5fEDu/srAADA3pisPH8zyeu6+weSXJPk+qq6LskvJrmtuw8m+VqSW5btb0nyte7+niS3LdsBAMB5b8t47g1/vdy9ZPnqJK9L8rvL+J1J3rjcvnG5n+Xx11dV7diMAQBgTUbnPFfVvqq6L8ljST6c5H8l+Xp3P7lscirJlcvtK5M8nCTL448nefFOThoAANZhFM/d/VR3X5PkqiTXJvneVZst31etMvfTB6rqSFUdr6rjTz3x+HS+AACwNs/p0za6++tJPpbkuiSXV9X+5aGrkjyy3D6V5OokWR6/LMlXVzzX7d19qLsP7Xv+ZWc3ewAA2EOTT9t4aVVdvtz+9iQ/nOShJB9N8uPLZjcn+eBy++7lfpbHP9Ldz1h5BgCA883+rTfJFUnurKp92Yjtu7r7D6rqc0neX1X/IcmfJrlj2f6OJP+tqk5kY8X5pl2YNwAA7Lkt47m770/yqhXjX8zG+c9PH/+bJG/akdkBAMA5xBUGAQBgSDwDAMCQeAYAgCHxDAAAQ+IZAACGxDMAAAyJZwAAGBLPAAAwJJ4BAGBIPAMAwJB4BgCAIfEMAABD4hkAAIbEMwAADIlnAAAYEs8AADAkngEAYEg8AwDAkHgGAIAh8QwAAEPiGQAAhsQzAAAMiWcAABgSzwAAMCSeAQBgSDwDAMCQeAYAgCHxDAAAQ+IZAACGxDMAAAyJZwAAGBLPAAAwJJ4BAGBIPAMAwJB4BgCAIfEMAABD4hkAAIbEMwAADIlnAAAYEs8AADAkngEAYEg8AwDAkHgGAIAh8QwAAEPiGQAAhsQzAAAMiWcAABgSzwAAMCSeAQBgSDwDAMCQeAYAgCHxDAAAQ+IZAACGxDMAAAyJZwAAGBLPAAAwJJ4BAGBIPAMAwJB4BgCAIfEMAABD4hkAAIbEMwAADIlnAAAYEs8AADAkngEAYEg8AwDAkHgGAIAh8QwAAEPiGQAAhsQzAAAMiWcAABgSzwAAMCSeAQBgaMt4rqqrq+qjVfVQVT1YVe9Yxn++qv6iqu5bvm7YtM87q+pEVX2+qn50N38BAADYK/sH2zyZ5Ke7+zNV9YIkn66qDy+P3dbd/3HzxlX1yiQ3Jfm+JH8/yf+sqn/Q3U/t5MQBAGCvbbny3N2PdvdnltvfSPJQkiufZZcbk7y/u7/Z3V9KciLJtTsxWQAAWKfndM5zVR1I8qokn1iG3l5V91fVe6vqhcvYlUke3rTbqayI7ao6UlXHq+r4U088/pwnDgAAe20cz1X1nUl+L8lPdvdfJXlPku9Ock2SR5P80ulNV+zezxjovr27D3X3oX3Pv+w5TxwAAPbaKJ6r6pJshPNvdvfvJ0l3f6W7n+ruv03ya/nWqRmnkly9aferkjyyc1MGAID1mHzaRiW5I8lD3f3Lm8av2LTZjyV5YLl9d5KbqurSqnpFkoNJPrlzUwYAgPWYfNrGa5K8Jclnq+q+Zexnk7y5qq7JxikZJ5P8RJJ094NVdVeSz2Xjkzpu9UkbAABcCLaM5+7+k6w+j/lDz7LPu5K8axvzAgCAc44rDAIAwJB4BgCAIfEMAABD4hkAAIbEMwAADIlnAAAYEs8AADAkngEAYEg8AwDAkHgGAIAh8QwAAEPiGQAAhsQzAAAMiWcAABgSzwAAMCSeAQBgSDwDAMCQeAYAgCHxDAAAQ+IZAACGxDMAAAyJZwAAGBLPAAAwtH/dE3iuDhy9Z+X4yWOH93gmAABcbKw8AwDAkHgGAIAh8QwAAEPiGQAAhsQzAAAMiWcAABgSzwAAMCSeAQBgSDwDAMCQeAYAgCHxDAAAQ+IZAACGxDMAAAyJZwAAGBLPAAAwJJ4BAGBIPAMAwJB4BgCAIfEMAABD4hkAAIbEMwAADO1f9wT4uw4cvWfl+Mljh/d4JgAAPJ2VZwAAGBLPAAAwJJ4BAGBIPAMAwJB4BgCAIfEMAABD4hkAAIbEMwAADIlnAAAYEs8AADAkngEAYEg8AwDAkHgGAIAh8QwAAEPiGQAAhsQzAAAMiWcAABgSzwAAMCSeAQBgSDwDAMCQeAYAgCHxDAAAQ+IZAACGxDMAAAyJZwAAGBLPAAAwtGU8V9XVVfXRqnqoqh6sqncs4y+qqg9X1ReW7y9cxquq3l1VJ6rq/qp69W7/EgAAsBcmK89PJvnp7v7eJNclubWqXpnkaJJ7u/tgknuX+0nyhiQHl68jSd6z47MGAIA12DKeu/vR7v7McvsbSR5KcmWSG5PcuWx2Z5I3LrdvTPIbveHjSS6vqit2fOYAALDHntM5z1V1IMmrknwiycu7+9FkI7CTvGzZ7MokD2/a7dQyBgAA57VxPFfVdyb5vSQ/2d1/9WybrhjrFc93pKqOV9Xxp554fDoNAABYm1E8V9Ul2Qjn3+zu31+Gv3L6dIzl+2PL+KkkV2/a/aokjzz9Obv79u4+1N2H9j3/srOdPwAA7JnJp21UkjuSPNTdv7zpobuT3LzcvjnJBzeNv3X51I3rkjx++vQOAAA4n+0fbPOaJG9J8tmqum8Z+9kkx5LcVVW3JPlykjctj30oyQ1JTiR5IsnbdnTGAACwJlvGc3f/SVafx5wkr1+xfSe5dZvzAgCAc44rDAIAwJB4BgCAIfEMAABD4hkAAIbEMwAADIlnAAAYEs8AADAkngEAYEg8AwDAkHgGAIAh8QwAAEPiGQAAhsQzAAAMiWcAABgSzwAAMCSeAQBgSDwDAMDQ/nVPYKccOHrPyvGTxw7v8UwAALhQWXkGAIAh8QwAAEPiGQAAhsQzAAAMiWcAABgSzwAAMCSeAQBgSDwDAMCQeAYAgKEL5gqDZ7LqyoOuOggAwNmw8gwAAEPiGQAAhsQzAAAMiWcAABgSzwAAMCSeAQBgSDwDAMCQeAYAgCHxDAAAQ+IZAACGxDMAAAyJZwAAGBLPAAAwJJ4BAGBIPAMAwJB4BgCAIfEMAABD4hkAAIbEMwAADIlnAAAYEs8AADAkngEAYGj/uiewDgeO3rNy/OSxw3s8EwAAzidWngEAYEg8AwDAkHgGAIAh8QwAAEPiGQAAhsQzAAAMiWcAABgSzwAAMCSeAQBgSDwDAMCQeAYAgCHxDAAAQ/vXPYGLwYGj96wcP3ns8B7PBACA7bDyDAAAQ+IZAACGnLaxBadcAABwmpVnAAAYEs8AADAkngEAYEg8AwDAkDcM7qAzvbkQAIALg5VnAAAY2jKeq+q9VfVYVT2waeznq+ovquq+5euGTY+9s6pOVNXnq+pHd2viAACw1yYrz+9Lcv2K8du6+5rl60NJUlWvTHJTku9b9vnVqtq3U5MFAIB12jKeu/uPk3x1+Hw3Jnl/d3+zu7+U5ESSa7cxPwAAOGds55znt1fV/ctpHS9cxq5M8vCmbU4tY89QVUeq6nhVHX/qice3MQ0AANgbZxvP70ny3UmuSfJokl9axmvFtr3qCbr79u4+1N2H9j3/srOcBgAA7J2ziufu/kp3P9Xdf5vk1/KtUzNOJbl606ZXJXlke1MEAIBzw1nFc1VdsenujyU5/Ukcdye5qaourapXJDmY5JPbmyIAAJwbtrxISlX9dpLXJnlJVZ1K8nNJXltV12TjlIyTSX4iSbr7waq6K8nnkjyZ5Nbufmp3pg4AAHtry3ju7jevGL7jWbZ/V5J3bWdSAABwLnKFQQAAGBLPAAAwtOVpG6x24Og9654CAAB7zMozAAAMiWcAABgSzwAAMCSeAQBgyBsGN/EmQAAAno2VZwAAGBLPAAAwJJ4BAGBIPAMAwJB4BgCAIfEMAABD4hkAAIbEMwAADIlnAAAYEs8AADAkngEAYGj/uifAzIGj9zxj7OSxw2uYCQDAxcvKMwAADIlnAAAYEs8AADAkngEAYEg8AwDAkE/bWKNVn6ABAMC5y8ozAAAMiWcAABgSzwAAMCSeAQBgSDwDAMCQeAYAgCHxDAAAQ+IZAACGxDMAAAyJZwAAGBLPAAAwJJ4BAGBIPAMAwJB4BgCAIfEMAABD4hkAAIbEMwAADIlnAAAYEs8AADAkngEAYEg8AwDAkHgGAIAh8QwAAEPiGQAAhsQzAAAM7V/3BDh7B47es3L85LHDezwTAICLg5VnAAAYEs8AADAkngEAYEg8AwDAkHgGAIAh8QwAAEPiGQAAhsQzAAAMiWcAABgSzwAAMCSeAQBgSDwDAMCQeAYAgCHxDAAAQ+IZAACGxDMAAAztX/cE2HkHjt7zjLGTxw6vYSYAABcWK88AADAkngEAYEg8AwDA0JbxXFXvrarHquqBTWMvqqoPV9UXlu8vXMarqt5dVSeq6v6qevVuTh4AAPbSZOX5fUmuf9rY0ST3dvfBJPcu95PkDUkOLl9HkrxnZ6YJAADrt2U8d/cfJ/nq04ZvTHLncvvOJG/cNP4bveHjSS6vqit2arIAALBOZ3vO88u7+9EkWb6/bBm/MsnDm7Y7tYwBAMB5b6ffMFgrxnrlhlVHqup4VR1/6onHd3gaAACw8842nr9y+nSM5ftjy/ipJFdv2u6qJI+seoLuvr27D3X3oX3Pv+wspwEAAHvnbOP57iQ3L7dvTvLBTeNvXT5147okj58+vQMAAM53W16eu6p+O8lrk7ykqk4l+bkkx5LcVVW3JPlykjctm38oyQ1JTiR5IsnbdmHOAACwFlvGc3e/+QwPvX7Ftp3k1u1OCgAAzkWuMAgAAEPiGQAAhsQzAAAMiWcAABgSzwAAMCSeAQBgSDwDAMCQeAYAgCHxDAAAQ1teYZALw4Gj96wcP3ns8B7PBADg/GXlGQAAhsQzAAAMiWcAABgSzwAAMCSeAQBgSDwDAMCQeAYAgCHxDAAAQ+IZAACGXGHwIufKgwAAc1aeAQBgSDwDAMCQeAYAgCHxDAAAQ+IZAACGxDMAAAyJZwAAGBLPAAAwJJ4BAGDIFQYZczVCAOBiZ+UZAACGxDMAAAyJZwAAGBLPAAAw5A2DbNuqNxJ6EyEAcCGy8gwAAEPiGQAAhpy2wUpn+kxnAICLmZVnAAAYEs8AADAkngEAYEg8AwDAkHgGAIAh8QwAAEPiGQAAhsQzAAAMiWcAABhyhUF2xZmuUHjy2OE9ngkAwM6x8gwAAEPiGQAAhsQzAAAMiWcAABgSzwAAMCSeAQBgSDwDAMCQeAYAgCHxDAAAQ+IZAACGXJ6bPeWy3QDA+czKMwAADIlnAAAYEs8AADAkngEAYEg8AwDAkHgGAIAh8QwAAEPiGQAAhsQzAAAMiWcAABgSzwAAMCSeAQBgSDwDAMCQeAYAgKH929m5qk4m+UaSp5I82d2HqupFSX4nyYEkJ5P8q+7+2vamCQAA67cTK88/1N3XdPeh5f7RJPd298Ek9y73AQDgvLcbp23cmOTO5fadSd64Cz8DAAD23LZO20jSSf6oqjrJf+nu25O8vLsfTZLufrSqXrZqx6o6kuRIkuz7rpducxpciA4cvWfl+Mljh/d4JgAAG7Ybz6/p7keWQP5wVf35dMcltG9PkkuvONjbnAcAAOy6bcVzdz+yfH+sqj6Q5NokX6mqK5ZV5yuSPLYD8+QCd6ZVZgCAc8lZn/NcVd9RVS84fTvJjyR5IMndSW5eNrs5yQe3O0kAADgXbGfl+eVJPlBVp5/nt7r7D6vqU0nuqqpbknw5yZu2P00AAFi/s47n7v5ikh9YMf5/krx+O5MCAIBzkSsMAgDAkHgGAIAh8QwAAEPiGQAAhsQzAAAMiWcAABgSzwAAMCSeAQBgSDwDAMCQeAYAgCHxDAAAQ+IZAACGxDMAAAyJZwAAGBLPAAAwJJ4BAGBIPAMAwND+dU8AnqsDR+95xtjJY4fXMBMA4GJj5RkAAIbEMwAADIlnAAAYEs8AADAkngEAYEg8AwDAkHgGAIAh8QwAAEPiGQAAhlxhkAvCqqsOJq48CADsLCvPAAAwJJ4BAGBIPAMAwJB4BgCAIfEMAABD4hkAAIbEMwAADIlnAAAYEs8AADAkngEAYEg8AwDAkHgGAIAh8QwAAEPiGQAAhsQzAAAMiWcAABgSzwAAMCSeAQBgSDwDAMCQeAYAgCHxDAAAQ+IZAACG9q97AnCuOHD0npXjJ48d3uOZAADnKvHMBW1VEIthAOBsOW0DAACGxDMAAAyJZwAAGHLOM2zBedMAwGlWngEAYEg8AwDAkNM2uOic6fOcAQC2Ip7hLLigCgBcnJy2AQAAQ1aeYU2sXgPA+cfKMwAADIlnAAAYEs8AADAkngEAYMgbBmEH7dalvL25EADODVaeAQBgyMozXGCsUgPA7rHyDAAAQ+IZAACGnLYB55gznXYBAKyflWcAABjatZXnqro+yX9Ksi/Jr3f3sd36WXAus5IMABeOXYnnqtqX5D8n+edJTiX5VFXd3d2f242fB5ydvf5kDp8EAsD5brdO27g2yYnu/mJ3/98k709y4y79LAAA2BPV3Tv/pFU/nuT67v43y/23JPnB7n77pm2OJDmy3P3+JA/s+EQ4370kyV+uexKccxwXrOK4YBXHBav8w+5+wdnuvFvnPNeKsb9T6d19e5Lbk6Sqjnf3oV2aC+cpxwWrOC5YxXHBKo4LVqmq49vZf7dO2ziV5OpN969K8sgu/SwAANgTuxXPn0pysKpeUVXfluSmJHfv0s8CAIA9sSunbXT3k1X19iT/IxsfVffe7n7wWXa5fTfmwXnPccEqjgtWcVywiuOCVbZ1XOzKGwYBAOBC5AqDAAAwJJ4BAGBo7fFcVddX1eer6kRVHV33fFifqjpZVZ+tqvtOf4xMVb2oqj5cVV9Yvr9w3fNkd1XVe6vqsap6YNPYyuOgNrx7ef24v6pevb6Zs5vOcFz8fFX9xfKacV9V3bDpsXcux8Xnq+pH1zNrdlNVXV1VH62qh6rqwap6xzLu9eIi9izHxY69Xqw1njddxvsNSV6Z5M1V9cp1zom1+6HuvmbT53IeTXJvdx9Mcu9ynwvb+5Jc/7SxMx0Hb0hycPk6kuQ9ezRH9t778szjIkluW14zrunuDyXJ8u/ITUm+b9nnV5d/b7iwPJnkp7v7e5Ncl+TW5b+914uL25mOi2SHXi/WvfLsMt5s5cYkdy6370zyxjXOhT3Q3X+c5KtPGz7TcXBjkt/oDR9PcnlVXbE3M2UvneG4OJMbk7y/u7/Z3V9KciIb/95wAenuR7v7M8vtbyR5KMmV8XpxUXuW4+JMnvPrxbrj+cokD2+6fyrP/gtyYeskf1RVn14u354kL+/uR5ON/yGSvGxts2OdznQceA3h7cuf4N+76bQux8VFpqoOJHlVkk/E6wWLpx0XyQ69Xqw7nre8jDcXldd096uz8ae1W6vqn617QpzzvIZc3N6T5LuTXJPk0SS/tIw7Li4iVfWdSX4vyU92918926YrxhwXF6gVx8WOvV6sO55dxpv/r7sfWb4/luQD2fizyVdO/1lt+f7Y+mbIGp3pOPAachHr7q9091Pd/bdJfi3f+lOr4+IiUVWXZCOQfrO7f38Z9npxkVt1XOzk68W649llvEmSVNV3VNULTt9O8iNJHsjG8XDzstnNST64nhmyZmc6Du5O8tblXfTXJXn89J9rufA97XzVH8vGa0aycVzcVFWXVtUrsvEGsU/u9fzYXVVVSe5I8lB3//Kmh7xeXMTOdFzs5OvFrlyee+osLuPNhevlST6wccxnf5Lf6u4/rKpPJbmrqm5J8uUkb1rjHNkDVfXbSV6b5CVVdSrJzyU5ltXHwYeS3JCNN3g8keRtez5h9sQZjovXVtU12fgT68kkP5Ek3f1gVd2V5HPZeOf9rd391Drmza56TZK3JPlsVd23jP1svF5c7M50XLx5p14vXJ4bAACG1n3aBgAAnDfEMwAADIlnAAAYEs8AADAkngEAYEg8AwDAkHgGAICh/wfyld8Sbug96wAAAABJRU5ErkJggg==\n",
      "text/plain": [
       "<Figure size 864x864 with 1 Axes>"
      ]
     },
     "metadata": {
      "needs_background": "light"
     },
     "output_type": "display_data"
    },
    {
     "data": {
      "image/png": "iVBORw0KGgoAAAANSUhEUgAAAs8AAAKvCAYAAACVhiLtAAAABHNCSVQICAgIfAhkiAAAAAlwSFlzAAALEgAACxIB0t1+/AAAADh0RVh0U29mdHdhcmUAbWF0cGxvdGxpYiB2ZXJzaW9uMy4xLjMsIGh0dHA6Ly9tYXRwbG90bGliLm9yZy+AADFEAAAeHklEQVR4nO3df6zld13n8dd7OxVE2ZbfqW2TITq7K7qxsLO1CckGwV1Lx2wxEVOygS7pZtykJBjNroP/qMmSjMlK1WQlqZalblRoVEJjWVe2QIx/8GPACpRKmIVZOrahcYGKaWTT8b1/3O8s1/ZM73vm/jjz4/FIbu45n/M9535u+u2ZZz73e77f6u4AAABb+wfrngAAAFwoxDMAAAyJZwAAGBLPAAAwJJ4BAGBIPAMAwNA4nqvqsqr6s6r6w+X+S6vqY1X1hap6b1V92zL+rOX+8eXx/bszdQAA2Ftns/L81iQPbbr/S0nu6O4DSb6W5LZl/LYkX+vu70lyx7IdAABc8EbxXFXXJDmU5DeX+5Xk1Ul+b9nk7iSvW27fvNzP8vhrlu0BAOCCtm+43a8k+Y9Jnrvcf0GSr3f3k8v9k0muXm5fneThJOnuJ6vq8WX7v9r8glV1OMnhJKnLn/3PLn/BNU/7of/06ivGvwgAAGzlk5/85F9194vO9flbxnNV/WiSx7r7k1X1qtPDKzbtwWPfGui+M8mdSfKsqw70Vbf+ytOedOzooa2mBwAAY1X1v7fz/MnK8yuT/OuquinJs5P8w2ysRF9ZVfuW1edrkjyybH8yybVJTlbVviRXJPnqdiYJAADngy2Pee7ut3X3Nd29P8ktST7U3f8myYeT/Piy2a1J3r/cvne5n+XxD3X301aeAQDgQrOd8zz/bJKfrqrj2Tim+a5l/K4kL1jGfzrJke1NEQAAzg/TDwwmSbr7I0k+stz+YpLrV2zzt0levwNzAwCA84orDAIAwJB4BgCAIfEMAABD4hkAAIbEMwAADIlnAAAYEs8AADAkngEAYEg8AwDAkHgGAIAh8QwAAEPiGQAAhsQzAAAMiWcAABgSzwAAMCSeAQBgSDwDAMCQeAYAgCHxDAAAQ+IZAACGxDMAAAyJZwAAGBLPAAAwJJ4BAGBIPAMAwJB4BgCAIfEMAABD4hkAAIbEMwAADIlnAAAYEs8AADAkngEAYEg8AwDAkHgGAIAh8QwAAEPiGQAAhsQzAAAMiWcAABgSzwAAMCSeAQBgSDwDAMCQeAYAgCHxDAAAQ+IZAACGxDMAAAyJZwAAGBLPAAAwJJ4BAGBIPAMAwJB4BgCAIfEMAABD4hkAAIbEMwAADIlnAAAYEs8AADAkngEAYEg8AwDAkHgGAIAh8QwAAEPiGQAAhsQzAAAMiWcAABgSzwAAMCSeAQBgSDwDAMCQeAYAgCHxDAAAQ+IZAACGxDMAAAyJZwAAGBLPAAAwJJ4BAGBIPAMAwNCW8VxVz66qj1fVn1fVg1X1i8v4u6vqS1X1wPJ13TJeVfVrVXW8qj5dVa/Y7V8CAAD2wr7BNt9M8uru/puqujzJn1bVf18e+w/d/XtP2f61SQ4sXz+Y5J3LdwAAuKBtufLcG/5muXv58tXP8JSbk/zW8ryPJrmyqq7a/lQBAGC9Rsc8V9VlVfVAkseSfLC7P7Y89Pbl0Iw7qupZy9jVSR7e9PSTy9hTX/NwVR2rqmOnnnh8G78CAADsjVE8d/ep7r4uyTVJrq+q70/ytiT/JMk/T/L8JD+7bF6rXmLFa97Z3Qe7++Blz7ninCYPAAB76azOttHdX0/ykSQ3dvejy6EZ30zyX5Ncv2x2Msm1m552TZJHdmCuAACwVpOzbbyoqq5cbn97kh9O8henj2OuqkryuiSfXZ5yb5I3LWfduCHJ49396K7MHgAA9tDkbBtXJbm7qi7LRmzf091/WFUfqqoXZeMwjQeS/Ptl+w8kuSnJ8SRPJHnzzk8bAAD23pbx3N2fTvLyFeOvPsP2neT27U8NAADOL64wCAAAQ+IZAACGxDMAAAyJZwAAGBLPAAAwJJ4BAGBIPAMAwJB4BgCAIfEMAABD4hkAAIbEMwAADIlnAAAYEs8AADAkngEAYEg8AwDAkHgGAIAh8QwAAEPiGQAAhsQzAAAMiWcAABgSzwAAMCSeAQBgSDwDAMCQeAYAgCHxDAAAQ+IZAACGxDMAAAyJZwAAGBLPAAAwJJ4BAGBIPAMAwJB4BgCAIfEMAABD4hkAAIbEMwAADIlnAAAYEs8AADAkngEAYEg8AwDAkHgGAIAh8QwAAEPiGQAAhsQzAAAMiWcAABgSzwAAMCSeAQBgSDwDAMCQeAYAgCHxDAAAQ+IZAACGxDMAAAyJZwAAGBLPAAAwJJ4BAGBIPAMAwJB4BgCAIfEMAABD4hkAAIbEMwAADIlnAAAYEs8AADAkngEAYEg8AwDAkHgGAIAh8QwAAEPiGQAAhsQzAAAMiWcAABgSzwAAMCSeAQBgSDwDAMCQeAYAgKEt47mqnl1VH6+qP6+qB6vqF5fxl1bVx6rqC1X13qr6tmX8Wcv948vj+3f3VwAAgL0xWXn+ZpJXd/cPJLkuyY1VdUOSX0pyR3cfSPK1JLct29+W5Gvd/T1J7li2AwCAC96W8dwb/ma5e/ny1UleneT3lvG7k7xuuX3zcj/L46+pqtqxGQMAwJqMjnmuqsuq6oEkjyX5YJL/leTr3f3kssnJJFcvt69O8nCSLI8/nuQFOzlpAABYh1E8d/ep7r4uyTVJrk/yvas2W76vWmXupw5U1eGqOlZVx0498fh0vgAAsDZndbaN7v56ko8kuSHJlVW1b3nomiSPLLdPJrk2SZbHr0jy1RWvdWd3H+zug5c954pzmz0AAOyhydk2XlRVVy63vz3JDyd5KMmHk/z4stmtSd6/3L53uZ/l8Q9199NWngEA4EKzb+tNclWSu6vqsmzE9j3d/YdV9bkk76mq/5Tkz5LctWx/V5L/VlXHs7HifMu5Tm7/kfueNnbi6KFzfTkAANiWLeO5uz+d5OUrxr+YjeOfnzr+t0levyOzAwCA84grDAIAwJB4BgCAIfEMAABD4hkAAIbEMwAADIlnAAAYEs8AADAkngEAYEg8AwDAkHgGAIAh8QwAAEPiGQAAhsQzAAAMiWcAABgSzwAAMCSeAQBgSDwDAMCQeAYAgCHxDAAAQ+IZAACGxDMAAAyJZwAAGBLPAAAwJJ4BAGBIPAMAwJB4BgCAIfEMAABD4hkAAIbEMwAADIlnAAAYEs8AADAkngEAYEg8AwDAkHgGAIAh8QwAAEPiGQAAhsQzAAAMiWcAABgSzwAAMCSeAQBgSDwDAMCQeAYAgCHxDAAAQ+IZAACGxDMAAAyJZwAAGBLPAAAwJJ4BAGBIPAMAwJB4BgCAIfEMAABD4hkAAIbEMwAADIlnAAAYEs8AADAkngEAYEg8AwDAkHgGAIAh8QwAAEPiGQAAhsQzAAAMiWcAABgSzwAAMCSeAQBgSDwDAMCQeAYAgCHxDAAAQ+IZAACGxDMAAAyJZwAAGBLPAAAwJJ4BAGBIPAMAwNCW8VxV11bVh6vqoap6sKreuoz/QlX9ZVU9sHzdtOk5b6uq41X1+ar6kd38BQAAYK/sG2zzZJKf6e5PVdVzk3yyqj64PHZHd//nzRtX1cuS3JLk+5J8V5L/WVX/qLtP7eTEAQBgr2258tzdj3b3p5bb30jyUJKrn+EpNyd5T3d/s7u/lOR4kut3YrIAALBOZ3XMc1XtT/LyJB9bht5SVZ+uqndV1fOWsauTPLzpaSezIrar6nBVHauqY6eeePysJw4AAHttHM9V9Z1Jfj/JT3X3Xyd5Z5LvTnJdkkeT/PLpTVc8vZ820H1ndx/s7oOXPeeKs544AADstVE8V9Xl2Qjn3+7uP0iS7v5Kd5/q7r9L8hv51qEZJ5Ncu+np1yR5ZOemDAAA6zE520YluSvJQ939jk3jV23a7MeSfHa5fW+SW6rqWVX10iQHknx856YMAADrMTnbxiuTvDHJZ6rqgWXs55K8oaquy8YhGSeS/GSSdPeDVXVPks9l40wdtzvTBgAAF4Mt47m7/zSrj2P+wDM85+1J3r6NeQEAwHnHFQYBAGBIPAMAwJB4BgCAIfEMAABD4hkAAIbEMwAADIlnAAAYEs8AADAkngEAYEg8AwDAkHgGAIAh8QwAAEPiGQAAhsQzAAAMiWcAABgSzwAAMCSeAQBgSDwDAMCQeAYAgCHxDAAAQ+IZAACGxDMAAAyJZwAAGBLPAAAwJJ4BAGBIPAMAwJB4BgCAIfEMAABD4hkAAIbEMwAADIlnAAAYEs8AADAkngEAYEg8AwDAkHgGAIAh8QwAAEPiGQAAhsQzAAAMiWcAABgSzwAAMCSeAQBgSDwDAMCQeAYAgCHxDAAAQ+IZAACGxDMAAAyJZwAAGBLPAAAwJJ4BAGBIPAMAwJB4BgCAIfEMAABD4hkAAIbEMwAADIlnAAAYEs8AADAkngEAYEg8AwDA0L51T4C/b/+R+1aOnzh6aI9nAgDAU1l5BgCAIfEMAABD4hkAAIbEMwAADIlnAAAYEs8AADAkngEAYEg8AwDAkHgGAIAh8QwAAEPiGQAAhsQzAAAMiWcAABjaMp6r6tqq+nBVPVRVD1bVW5fx51fVB6vqC8v35y3jVVW/VlXHq+rTVfWK3f4lAABgL0xWnp9M8jPd/b1Jbkhye1W9LMmRJPd394Ek9y/3k+S1SQ4sX4eTvHPHZw0AAGuwZTx396Pd/anl9jeSPJTk6iQ3J7l72ezuJK9bbt+c5Ld6w0eTXFlVV+34zAEAYI+d1THPVbU/ycuTfCzJS7r70WQjsJO8eNns6iQPb3rayWUMAAAuaON4rqrvTPL7SX6qu//6mTZdMdYrXu9wVR2rqmOnnnh8Og0AAFibUTxX1eXZCOff7u4/WIa/cvpwjOX7Y8v4ySTXbnr6NUkeeeprdved3X2wuw9e9pwrznX+AACwZyZn26gkdyV5qLvfsemhe5Pcuty+Ncn7N42/aTnrxg1JHj99eAcAAFzI9g22eWWSNyb5TFU9sIz9XJKjSe6pqtuSfDnJ65fHPpDkpiTHkzyR5M07OmMAAFiTLeO5u/80q49jTpLXrNi+k9y+zXkBAMB5xxUGAQBgSDwDAMCQeAYAgCHxDAAAQ+IZAACGxDMAAAyJZwAAGBLPAAAwJJ4BAGBIPAMAwJB4BgCAIfEMAABD4hkAAIbEMwAADIlnAAAYEs8AADAkngEAYEg8AwDAkHgGAIAh8QwAAEPiGQAAhsQzAAAMiWcAABgSzwAAMCSeAQBgSDwDAMDQvnVP4GKy/8h9K8dPHD20xzMBAGA3WHkGAIAh8QwAAEPiGQAAhsQzAAAMiWcAABgSzwAAMCSeAQBgSDwDAMCQeAYAgCHxDAAAQ+IZAACGxDMAAAyJZwAAGBLPAAAwJJ4BAGBIPAMAwJB4BgCAIfEMAABD4hkAAIbEMwAADIlnAAAYEs8AADAkngEAYEg8AwDAkHgGAIAh8QwAAEPiGQAAhsQzAAAMiWcAABgSzwAAMCSeAQBgaN+6J3C29h+5b+X4iaOH9ngmAABcaqw8AwDA0AW38ny+ONMKOAAAFy8rzwAAMCSeAQBgSDwDAMCQeAYAgCEfGNwDTq8HAHBxsPIMAABD4hkAAIYctrEF53MGAOA0K88AADAkngEAYEg8AwDAkHgGAIChLeO5qt5VVY9V1Wc3jf1CVf1lVT2wfN206bG3VdXxqvp8Vf3Ibk0cAAD22mTl+d1Jblwxfkd3X7d8fSBJquplSW5J8n3Lc369qi7bqckCAMA6bRnP3f0nSb46fL2bk7ynu7/Z3V9KcjzJ9duYHwAAnDe2c8zzW6rq08thHc9bxq5O8vCmbU4uY09TVYer6lhVHTv1xOPbmAYAAOyNc43ndyb57iTXJXk0yS8v47Vi2171At19Z3cf7O6Dlz3ninOcBgAA7J1ziufu/kp3n+ruv0vyG/nWoRknk1y7adNrkjyyvSkCAMD54Zwuz11VV3X3o8vdH0ty+kwc9yb5nap6R5LvSnIgyce3PcuLlEt/AwBcWLaM56r63SSvSvLCqjqZ5OeTvKqqrsvGIRknkvxkknT3g1V1T5LPJXkyye3dfWp3pg4AAHtry3ju7jesGL7rGbZ/e5K3b2dS5+JMq7gnjh7a45kAAHCxcoVBAAAYEs8AADB0Th8YvJCczYfyHOIBAMAzsfIMAABDF/3K89lw6jgAAJ6JlWcAABgSzwAAMCSeAQBgSDwDAMCQeAYAgCHxDAAAQ+IZAACGxDMAAAyJZwAAGHKFwQvEqqsfnjh6aA0zAQC4dFl5BgCAIfEMAABD4hkAAIbEMwAADIlnAAAYEs8AADAkngEAYEg8AwDAkHgGAIAh8QwAAEPiGQAAhsQzAAAMiWcAABgSzwAAMCSeAQBgSDwDAMCQeAYAgCHxDAAAQ+IZAACGxDMAAAyJZwAAGBLPAAAwJJ4BAGBIPAMAwJB4BgCAIfEMAABD4hkAAIbEMwAADIlnAAAYEs8AADAkngEAYEg8AwDAkHgGAIAh8QwAAEPiGQAAhsQzAAAMiWcAABgSzwAAMCSeAQBgSDwDAMCQeAYAgCHxDAAAQ+IZAACGxDMAAAyJZwAAGBLPAAAwJJ4BAGBIPAMAwJB4BgCAIfEMAABD4hkAAIbEMwAADIlnAAAYEs8AADC0b90T4NztP3LfyvETRw/t8UwAAC4NVp4BAGBIPAMAwNCWh21U1buS/GiSx7r7+5ex5yd5b5L9SU4k+Ynu/lpVVZJfTXJTkieS/Nvu/tTuTJ0zWXU4h0M5AAC2b7Ly/O4kNz5l7EiS+7v7QJL7l/tJ8tokB5avw0neuTPTBACA9dsynrv7T5J89SnDNye5e7l9d5LXbRr/rd7w0SRXVtVVOzVZAABYp3M95vkl3f1okizfX7yMX53k4U3bnVzGAADggrfTHxisFWO9csOqw1V1rKqOnXri8R2eBgAA7LxzjeevnD4cY/n+2DJ+Msm1m7a7Jskjq16gu+/s7oPdffCy51xxjtMAAIC9c67xfG+SW5fbtyZ5/6bxN9WGG5I8fvrwDgAAuNBNTlX3u0leleSFVXUyyc8nOZrknqq6LcmXk7x+2fwD2ThN3fFsnKruzbswZwAAWIst47m733CGh16zYttOcvt2JwUAAOejLeOZi9uqC6okLqoCALCKy3MDAMCQeAYAgCHxDAAAQ+IZAACGxDMAAAyJZwAAGBLPAAAwJJ4BAGBIPAMAwJB4BgCAIfEMAABD4hkAAIbEMwAADIlnAAAYEs8AADAkngEAYEg8AwDAkHgGAIAh8QwAAEPiGQAAhsQzAAAM7Vv3BLjw7T9y39PGThw9tIaZAADsLivPAAAwJJ4BAGBIPAMAwJB4BgCAIfEMAABD4hkAAIbEMwAADIlnAAAYEs8AADAkngEAYEg8AwDA0L51T4ALx/4j9617CgAAa2XlGQAAhsQzAAAMOWzjEuGQCwCA7bPyDAAAQ1aeOW+dabX8xNFDezwTAIANVp4BAGBIPAMAwJB4BgCAIfEMAABD4hkAAIacbYOV9vq80M5DDQBcCKw8AwDAkHgGAIAh8QwAAEPiGQAAhsQzAAAMiWcAABhyqjr2lFPSAQAXMivPAAAwJJ4BAGBIPAMAwJB4BgCAIfEMAABD4hkAAIbEMwAADIlnAAAYEs8AADDkCoPsClcSBAAuRlaeAQBgSDwDAMCQeAYAgCHxDAAAQ+IZAACGxDMAAAyJZwAAGHKeZy44q84hfeLooTXMBAC41Fh5BgCAIfEMAABD2zpso6pOJPlGklNJnuzug1X1/CTvTbI/yYkkP9HdX9veNAEAYP12YuX5h7r7uu4+uNw/kuT+7j6Q5P7lPgAAXPB247CNm5Pcvdy+O8nrduFnAADAnttuPHeSP66qT1bV4WXsJd39aJIs31+86olVdbiqjlXVsVNPPL7NaQAAwO7b7qnqXtndj1TVi5N8sKr+YvrE7r4zyZ1J8qyrDvQ25wEAALtuWyvP3f3I8v2xJO9Lcn2Sr1TVVUmyfH9su5MEAIDzwTnHc1V9R1U99/TtJP8qyWeT3Jvk1mWzW5O8f7uTBACA88F2Dtt4SZL3VdXp1/md7v6jqvpEknuq6rYkX07y+u1PEwAA1u+c47m7v5jkB1aM/58kr9nOpAAA4HzkCoMAADAkngEAYEg8AwDAkHgGAIAh8QwAAEPiGQAAhsQzAAAMiWcAABgSzwAAMCSeAQBgSDwDAMCQeAYAgCHxDAAAQ+IZAACGxDMAAAztW/cEYCfsP3LfyvETRw/t8UwAgIuZlWcAABgSzwAAMCSeAQBgSDwDAMCQeAYAgCHxDAAAQ+IZAACGxDMAAAyJZwAAGBLPAAAwJJ4BAGBo37onAOeL/UfuWzl+4uihPZ4JAHC+svIMAABD4hkAAIYctgFbWHU4h0M5AODSZOUZAACGrDxzUbNqDADsJCvPAAAwJJ4BAGBIPAMAwJB4BgCAIfEMAABD4hkAAIbEMwAADDnPM5ecVed+BgCYsPIMAABD4hkAAIYctgE7yOXAAeDiZuUZAACGxDMAAAyJZwAAGBLPAAAwJJ4BAGBIPAMAwJBT1cE5cJVCALg0iWdYkzMF+KrzQp/NtgDA7nHYBgAADIlnAAAYEs8AADAkngEAYEg8AwDAkHgGAIAhp6qDXeac0ABw8bDyDAAAQ+IZAACGHLYB5xmHeQDA+cvKMwAADFl5hgvYqlXqE0cPrWEmAHBpsPIMAABD4hkAAIbEMwAADIlnAAAY8oFBuET4cCEAbJ+VZwAAGBLPAAAw5LANYO0cUgLAhcLKMwAADO3aynNV3ZjkV5NcluQ3u/vobv0s4FtWreKe7bZnWvU9m9ferZXjs50zAOykXYnnqrosyX9J8i+TnEzyiaq6t7s/txs/D9hZZxPJ58Pr7sTPO9v4dqgJwKVptw7buD7J8e7+Ynf/3yTvSXLzLv0sAADYE9XdO/+iVT+e5Mbu/nfL/Tcm+cHufsumbQ4nObzc/f4kn93xiXChe2GSv1r3JDjv2C9YxX7BKvYLVvnH3f3cc33ybh3zXCvG/l6ld/edSe5Mkqo61t0Hd2kuXKDsF6xiv2AV+wWr2C9YpaqObef5u3XYxskk1266f02SR3bpZwEAwJ7YrXj+RJIDVfXSqvq2JLckuXeXfhYAAOyJXTlso7ufrKq3JPkf2ThV3bu6+8FneMqduzEPLnj2C1axX7CK/YJV7Bessq39Ylc+MAgAABcjVxgEAIAh8QwAAENrj+equrGqPl9Vx6vqyLrnw/pU1Ymq+kxVPXD6NDJV9fyq+mBVfWH5/rx1z5PdVVXvqqrHquqzm8ZW7ge14deW949PV9Ur1jdzdtMZ9otfqKq/XN4zHqiqmzY99rZlv/h8Vf3IembNbqqqa6vqw1X1UFU9WFVvXca9X1zCnmG/2LH3i7XG86bLeL82ycuSvKGqXrbOObF2P9Td1206L+eRJPd394Ek9y/3ubi9O8mNTxk7037w2iQHlq/DSd65R3Nk7707T98vkuSO5T3juu7+QJIs/47ckuT7luf8+vLvDReXJ5P8THd/b5Ibkty+/Lf3fnFpO9N+kezQ+8W6V55dxput3Jzk7uX23Ulet8a5sAe6+0+SfPUpw2faD25O8lu94aNJrqyqq/ZmpuylM+wXZ3Jzkvd09ze7+0tJjmfj3xsuIt39aHd/arn9jSQPJbk63i8uac+wX5zJWb9frDuer07y8Kb7J/PMvyAXt07yx1X1yeXy7Unyku5+NNn4HyLJi9c2O9bpTPuB9xDesvwJ/l2bDuuyX1xiqmp/kpcn+Vi8X7B4yn6R7ND7xbrjecvLeHNJeWV3vyIbf1q7var+xbonxHnPe8il7Z1JvjvJdUkeTfLLy7j94hJSVd+Z5PeT/FR3//UzbbpizH5xkVqxX+zY+8W649llvPn/uvuR5ftjSd6XjT+bfOX0n9WW74+tb4as0Zn2A+8hl7Du/kp3n+ruv0vyG/nWn1rtF5eIqro8G4H02939B8uw94tL3Kr9YiffL9Ydzy7jTZKkqr6jqp57+naSf5Xks9nYH25dNrs1yfvXM0PW7Ez7wb1J3rR8iv6GJI+f/nMtF7+nHK/6Y9l4z0g29otbqupZVfXSbHxA7ON7PT92V1VVkruSPNTd79j0kPeLS9iZ9oudfL/YlctzT53DZby5eL0kyfs29vnsS/I73f1HVfWJJPdU1W1Jvpzk9WucI3ugqn43yauSvLCqTib5+SRHs3o/+ECSm7LxAY8nkrx5zyfMnjjDfvGqqrouG39iPZHkJ5Okux+sqnuSfC4bn7y/vbtPrWPe7KpXJnljks9U1QPL2M/F+8Wl7kz7xRt26v3C5bkBAGBo3YdtAADABUM8AwDAkHgGAIAh8QwAAEPiGQAAhsQzAAAMiWcAABj6fzeO8NBlQoHyAAAAAElFTkSuQmCC\n",
      "text/plain": [
       "<Figure size 864x864 with 1 Axes>"
      ]
     },
     "metadata": {
      "needs_background": "light"
     },
     "output_type": "display_data"
    },
    {
     "data": {
      "image/png": "iVBORw0KGgoAAAANSUhEUgAAAs8AAAKvCAYAAACVhiLtAAAABHNCSVQICAgIfAhkiAAAAAlwSFlzAAALEgAACxIB0t1+/AAAADh0RVh0U29mdHdhcmUAbWF0cGxvdGxpYiB2ZXJzaW9uMy4xLjMsIGh0dHA6Ly9tYXRwbG90bGliLm9yZy+AADFEAAAeGklEQVR4nO3dbaxl51nf4f/dGeMQSO28y7UtTQTTlkCFk06NpUhVSCg4NqqNRCpHVWJFbodKjhoEapnkCyA10iAVTCMVSwa7cSogWEAUC7uA6yRCfMjLOBjHjkGZJtN4sGWXJjFBFqk83P1w1jSn9hmf23Ne9rxcl3S093722uc8R17e89Nz1l6rujsAAMDm/s6qJwAAAGcL8QwAAEPiGQAAhsQzAAAMiWcAABgSzwAAMDSO56raU1V/UlW/tzx+XVV9uqq+WFW/VVXftoxfuDw+ujy/b2emDgAAu+vFrDy/N8mj6x7/QpJbunt/kq8luWkZvynJ17r7u5PcsmwHAABnvVE8V9VlSa5N8mvL40ryliS/vWxyZ5Lrl/vXLY+zPP/WZXsAADir7R1u98tJ/n2Sly2PX5nk69397PL4eJJLl/uXJnksSbr72ap6etn+L9d/w6o6mORgktQFL/nHF7zysuf90H906UXjXwQAADbzwAMP/GV3v/p0X79pPFfVjyZ5qrsfqKo3nxzeYNMePPetge7bktyWJBdesr8vufGXn/eiI4ev3Wx6AAAwVlX/cyuvn6w8vynJP6+qa5K8JMnfzdpK9MVVtXdZfb4syePL9seTXJ7keFXtTXJRkq9uZZIAAHAm2PSY5+5+X3df1t37ktyQ5OPd/S+TfCLJjy+b3ZjkY8v9u5fHWZ7/eHc/b+UZAADONls5z/PPJPmpqjqatWOab1/Gb0/yymX8p5Ic2toUAQDgzDD9wGCSpLs/meSTy/0vJblyg23+Jsnbt2FuAABwRnGFQQAAGBLPAAAwJJ4BAGBIPAMAwJB4BgCAIfEMAABD4hkAAIbEMwAADIlnAAAYEs8AADAkngEAYEg8AwDAkHgGAIAh8QwAAEPiGQAAhsQzAAAMiWcAABgSzwAAMCSeAQBgSDwDAMCQeAYAgCHxDAAAQ+IZAACGxDMAAAyJZwAAGBLPAAAwJJ4BAGBIPAMAwJB4BgCAIfEMAABD4hkAAIbEMwAADIlnAAAYEs8AADAkngEAYEg8AwDAkHgGAIAh8QwAAEPiGQAAhsQzAAAMiWcAABgSzwAAMCSeAQBgSDwDAMCQeAYAgCHxDAAAQ+IZAACGxDMAAAyJZwAAGBLPAAAwJJ4BAGBIPAMAwJB4BgCAIfEMAABD4hkAAIbEMwAADIlnAAAYEs8AADAkngEAYEg8AwDAkHgGAIAh8QwAAEPiGQAAhsQzAAAMiWcAABgSzwAAMCSeAQBgSDwDAMCQeAYAgCHxDAAAQ+IZAACGxDMAAAyJZwAAGNo0nqvqJVX1mar606p6pKp+fhn/UFV9uaoeXL6uWMarqj5YVUer6qGqeuNO/xIAALAb9g62+WaSt3T3X1fVBUn+uKr+2/Lcv+vu337O9m9Lsn/5+oEkty63AABwVtt05bnX/PXy8ILlq1/gJdcl+fDyuk8lubiqLtn6VAEAYLVGxzxX1Z6qejDJU0nu6+5PL099YDk045aqunAZuzTJY+tefnwZe+73PFhVR6rqyIlnnt7CrwAAALtjFM/dfaK7r0hyWZIrq+r7krwvyT9M8k+SvCLJzyyb10bfYoPveVt3H+juA3teetFpTR4AAHbTizrbRnd/Pcknk1zd3U8sh2Z8M8l/SXLlstnxJJeve9llSR7fhrkCAMBKTc628eqquni5/+1JfijJn508jrmqKsn1SR5eXnJ3knctZ924KsnT3f3EjsweAAB20eRsG5ckubOq9mQttu/q7t+rqo9X1auzdpjGg0n+zbL9vUmuSXI0yTNJ3r390wYAgN23aTx390NJ3rDB+FtOsX0nuXnrUwMAgDOLKwwCAMCQeAYAgCHxDAAAQ+IZAACGxDMAAAyJZwAAGBLPAAAwJJ4BAGBIPAMAwJB4BgCAIfEMAABD4hkAAIbEMwAADIlnAAAYEs8AADAkngEAYEg8AwDAkHgGAIAh8QwAAEPiGQAAhsQzAAAMiWcAABgSzwAAMCSeAQBgSDwDAMCQeAYAgCHxDAAAQ+IZAACGxDMAAAyJZwAAGBLPAAAwJJ4BAGBIPAMAwJB4BgCAIfEMAABD4hkAAIbEMwAADIlnAAAYEs8AADAkngEAYEg8AwDAkHgGAIAh8QwAAEPiGQAAhsQzAAAMiWcAABgSzwAAMCSeAQBgSDwDAMCQeAYAgCHxDAAAQ+IZAACGxDMAAAyJZwAAGBLPAAAwJJ4BAGBIPAMAwJB4BgCAIfEMAABD4hkAAIbEMwAADIlnAAAYEs8AADAkngEAYEg8AwDAkHgGAIAh8QwAAEPiGQAAhsQzAAAMiWcAABgSzwAAMCSeAQBgaNN4rqqXVNVnqupPq+qRqvr5Zfx1VfXpqvpiVf1WVX3bMn7h8vjo8vy+nf0VAABgd0xWnr+Z5C3d/f1JrkhydVVdleQXktzS3fuTfC3JTcv2NyX5Wnd/d5Jblu0AAOCst2k895q/Xh5esHx1krck+e1l/M4k1y/3r1seZ3n+rVVV2zZjAABYkdExz1W1p6oeTPJUkvuS/I8kX+/uZ5dNjie5dLl/aZLHkmR5/ukkr9zOSQMAwCqM4rm7T3T3FUkuS3Jlku/ZaLPldqNV5n7uQFUdrKojVXXkxDNPT+cLAAAr86LOttHdX0/yySRXJbm4qvYuT12W5PHl/vEklyfJ8vxFSb66wfe6rbsPdPeBPS+96PRmDwAAu2hyto1XV9XFy/1vT/JDSR5N8okkP75sdmOSjy33714eZ3n+4939vJVnAAA42+zdfJNckuTOqtqTtdi+q7t/r6q+kOQjVfUfkvxJktuX7W9P8l+r6mjWVpxv2IF5AwDArts0nrv7oSRv2GD8S1k7/vm543+T5O3bMjsAADiDuMIgAAAMiWcAABgSzwAAMCSeAQBgSDwDAMCQeAYAgCHxDAAAQ+IZAACGxDMAAAyJZwAAGBLPAAAwJJ4BAGBIPAMAwJB4BgCAIfEMAABD4hkAAIbEMwAADIlnAAAYEs8AADAkngEAYEg8AwDAkHgGAIAh8QwAAEPiGQAAhsQzAAAMiWcAABgSzwAAMCSeAQBgSDwDAMCQeAYAgCHxDAAAQ+IZAACGxDMAAAyJZwAAGBLPAAAwJJ4BAGBIPAMAwJB4BgCAIfEMAABD4hkAAIbEMwAADIlnAAAYEs8AADAkngEAYEg8AwDAkHgGAIAh8QwAAEPiGQAAhsQzAAAMiWcAABgSzwAAMCSeAQBgSDwDAMCQeAYAgCHxDAAAQ+IZAACGxDMAAAyJZwAAGNq76gm8kH2H7nne2LHD165gJgAAYOUZAADGxDMAAAyJZwAAGBLPAAAwJJ4BAGBIPAMAwJB4BgCAIfEMAABD4hkAAIbEMwAADIlnAAAYEs8AADAkngEAYEg8AwDA0KbxXFWXV9UnqurRqnqkqt67jP9cVf1FVT24fF2z7jXvq6qjVfXnVfUjO/kLAADAbtk72ObZJD/d3Z+rqpcleaCq7lueu6W7/+P6javq9UluSPK9Sf5ekv9eVX+/u09s58TPVfsO3bPh+LHD1+7yTAAAeK5NV567+4nu/txy/xtJHk1y6Qu85LokH+nub3b3l5McTXLldkwWAABW6UUd81xV+5K8Icmnl6H3VNVDVXVHVb18Gbs0yWPrXnY8G8R2VR2sqiNVdeTEM0+/6IkDAMBuG8dzVX1nkt9J8pPd/VdJbk3yXUmuSPJEkl88uekGL+/nDXTf1t0HuvvAnpde9KInDgAAu20Uz1V1QdbC+de7+3eTpLuf7O4T3f23SX413zo043iSy9e9/LIkj2/flAEAYDUmZ9uoJLcnebS7f2nd+CXrNvuxJA8v9+9OckNVXVhVr0uyP8lntm/KAACwGpOzbbwpyTuTfL6qHlzG3p/kHVV1RdYOyTiW5CeSpLsfqaq7knwha2fquNmZNgAAOBdsGs/d/cfZ+Djme1/gNR9I8oEtzAsAAM44rjAIAABD4hkAAIbEMwAADIlnAAAYEs8AADAkngEAYEg8AwDAkHgGAIAh8QwAAEPiGQAAhsQzAAAMiWcAABgSzwAAMCSeAQBgSDwDAMCQeAYAgCHxDAAAQ+IZAACGxDMAAAyJZwAAGBLPAAAwJJ4BAGBIPAMAwJB4BgCAIfEMAABD4hkAAIbEMwAADIlnAAAYEs8AADAkngEAYEg8AwDAkHgGAIAh8QwAAEPiGQAAhsQzAAAMiWcAABgSzwAAMCSeAQBgSDwDAMCQeAYAgCHxDAAAQ+IZAACGxDMAAAyJZwAAGBLPAAAwJJ4BAGBIPAMAwJB4BgCAIfEMAABD4hkAAIbEMwAADIlnAAAYEs8AADAkngEAYEg8AwDAkHgGAIAh8QwAAEPiGQAAhsQzAAAMiWcAABgSzwAAMCSeAQBgSDwDAMCQeAYAgCHxDAAAQ+IZAACGxDMAAAyJZwAAGBLPAAAwJJ4BAGBIPAMAwJB4BgCAoU3juaour6pPVNWjVfVIVb13GX9FVd1XVV9cbl++jFdVfbCqjlbVQ1X1xp3+JQAAYDdMVp6fTfLT3f09Sa5KcnNVvT7JoST3d/f+JPcvj5PkbUn2L18Hk9y67bMGAIAV2DSeu/uJ7v7ccv8bSR5NcmmS65LcuWx2Z5Lrl/vXJflwr/lUkour6pJtnzkAAOyyF3XMc1XtS/KGJJ9O8trufiJZC+wkr1k2uzTJY+tednwZAwCAs9re6YZV9Z1JfifJT3b3X1XVKTfdYKw3+H4Hs3ZYR/b83VdPp3FO2XfonlVPAQCAF2G08lxVF2QtnH+9u393GX7y5OEYy+1Ty/jxJJeve/llSR5/7vfs7tu6+0B3H9jz0otOd/4AALBrJmfbqCS3J3m0u39p3VN3J7lxuX9jko+tG3/XctaNq5I8ffLwDgAAOJtNDtt4U5J3Jvl8VT24jL0/yeEkd1XVTUm+kuTty3P3JrkmydEkzyR597bOGAAAVmTTeO7uP87GxzEnyVs32L6T3LzFeQEAwBnHFQYBAGBofLaNM8WpzlBx7PC1uzwTAADON1aeAQBgSDwDAMCQeAYAgCHxDAAAQ+IZAACGxDMAAAyJZwAAGDrrzvN8NjrVuakBADi7WHkGAIAh8QwAAEPiGQAAhsQzAAAMiWcAABgSzwAAMCSeAQBgSDwDAMCQeAYAgCFXGNzEqa4OeOzwtbs8EwAAVs3KMwAADIlnAAAYEs8AADAkngEAYEg8AwDAkHgGAIAh8QwAAEPO87zOqc7pDAAAiZVnAAAYs/K8jaxcAwCc26w8AwDAkHgGAIAh8QwAAEPiGQAAhsQzAAAMiWcAABgSzwAAMCSeAQBgSDwDAMDQOXOFwVNd3e/Y4Wt3eSYAAJyrzpl43m0uxQ0AcP5x2AYAAAyJZwAAGBLPAAAwJJ4BAGBIPAMAwJB4BgCAIfEMAABD4hkAAIbEMwAADIlnAAAYEs8AADAkngEAYEg8AwDAkHgGAIAh8QwAAEPiGQAAhsQzAAAMiWcAABgSzwAAMCSeAQBgSDwDAMDQ3lVPYBX2Hbpn1VMAAOAsZOUZAACGxDMAAAyJZwAAGBLPAAAwJJ4BAGBIPAMAwJB4BgCAIfEMAABD4hkAAIbEMwAADG16ee6quiPJjyZ5qru/bxn7uST/Osn/WjZ7f3ffuzz3viQ3JTmR5N929x/swLzHXIobAIDtMll5/lCSqzcYv6W7r1i+Tobz65PckOR7l9f8SlXt2a7JAgDAKm0az939R0m+Ovx+1yX5SHd/s7u/nORokiu3MD8AADhjbOWY5/dU1UNVdUdVvXwZuzTJY+u2Ob6MPU9VHayqI1V15MQzT29hGgAAsDtON55vTfJdSa5I8kSSX1zGa4Nte6Nv0N23dfeB7j6w56UXneY0AABg95xWPHf3k919orv/Nsmv5luHZhxPcvm6TS9L8vjWpggAAGeG04rnqrpk3cMfS/Lwcv/uJDdU1YVV9bok+5N8ZmtTBACAM8PkVHW/meTNSV5VVceT/GySN1fVFVk7JONYkp9Iku5+pKruSvKFJM8mubm7T+zM1AEAYHdtGs/d/Y4Nhm9/ge0/kOQDW5kUAACciVxhEAAAhsQzAAAMiWcAABgSzwAAMCSeAQBgSDwDAMCQeAYAgCHxDAAAQ+IZAACGxDMAAAyJZwAAGBLPAAAwJJ4BAGBIPAMAwJB4BgCAIfEMAABD4hkAAIbEMwAADIlnAAAYEs8AADAkngEAYEg8AwDAkHgGAIAh8QwAAEPiGQAAhsQzAAAMiWcAABgSzwAAMCSeAQBgSDwDAMCQeAYAgCHxDAAAQ+IZAACGxDMAAAyJZwAAGBLPAAAwJJ4BAGBIPAMAwJB4BgCAIfEMAABDe1c9AWb2HbrneWPHDl+7gpkAAJy/rDwDAMCQeAYAgCHxDAAAQ+IZAACGxDMAAAyJZwAAGBLPAAAwJJ4BAGBIPAMAwJB4BgCAIfEMAABD4hkAAIbEMwAADIlnAAAYEs8AADAkngEAYEg8AwDAkHgGAIAh8QwAAEPiGQAAhvauegKcvn2H7tlw/Njha3d5JgAA5wcrzwAAMCSeAQBgSDwDAMCQeAYAgCHxDAAAQ+IZAACGxDMAAAyJZwAAGBLPAAAwJJ4BAGBo03iuqjuq6qmqenjd2Cuq6r6q+uJy+/JlvKrqg1V1tKoeqqo37uTkAQBgN01Wnj+U5OrnjB1Kcn93709y//I4Sd6WZP/ydTDJrdszTQAAWL1N47m7/yjJV58zfF2SO5f7dya5ft34h3vNp5JcXFWXbNdkAQBglU73mOfXdvcTSbLcvmYZvzTJY+u2O76MAQDAWW+7PzBYG4z1hhtWHayqI1V15MQzT2/zNAAAYPudbjw/efJwjOX2qWX8eJLL1213WZLHN/oG3X1bdx/o7gN7XnrRaU4DAAB2z+nG891Jblzu35jkY+vG37WcdeOqJE+fPLwDAADOdns326CqfjPJm5O8qqqOJ/nZJIeT3FVVNyX5SpK3L5vfm+SaJEeTPJPk3TswZwAAWIlN47m733GKp966wbad5OatTgoAAM5ErjAIAABD4hkAAIbEMwAADIlnAAAYEs8AADAkngEAYEg8AwDAkHgGAIAh8QwAAEPiGQAAhsQzAAAMiWcAABgSzwAAMCSeAQBgSDwDAMCQeAYAgCHxDAAAQ+IZAACGxDMAAAyJZwAAGBLPAAAwtHfVE2D77Tt0z/PGjh2+dgUzAQA4t1h5BgCAIfEMAABD4hkAAIbEMwAADIlnAAAYEs8AADAkngEAYMh5ns8TG537OXH+ZwCAF8PKMwAADIlnAAAYEs8AADAkngEAYEg8AwDAkHgGAIAh8QwAAEPiGQAAhsQzAAAMucIgW7bR1QtduRAAOBdZeQYAgCHxDAAAQ+IZAACGxDMAAAz5wCBjG30wEADgfGLlGQAAhsQzAAAMiWcAABgSzwAAMCSeAQBgSDwDAMCQeAYAgCHxDAAAQ+IZAACGxDMAAAyJZwAAGBLPAAAwJJ4BAGBIPAMAwJB4BgCAIfEMAABD4hkAAIbEMwAADO1d9QRYrX2H7tlw/Njha8+JnwcAsJ2sPAMAwJB4BgCAIfEMAABD4hkAAIZ8YJANneqDfbv1egCAM5GVZwAAGBLPAAAw5LANzljOCQ0AnGmsPAMAwNCWVp6r6liSbyQ5keTZ7j5QVa9I8ltJ9iU5luRfdPfXtjZNAABYve1Yef7B7r6iuw8sjw8lub+79ye5f3kMAABnvZ04bOO6JHcu9+9Mcv0O/AwAANh1W43nTvKHVfVAVR1cxl7b3U8kyXL7mo1eWFUHq+pIVR058czTW5wGAADsvK2ebeNN3f14Vb0myX1V9WfTF3b3bUluS5ILL9nfW5wHAADsuC2tPHf348vtU0k+muTKJE9W1SVJstw+tdVJAgDAmeC047mqvqOqXnbyfpIfTvJwkruT3LhsdmOSj211kgAAcCbYymEbr03y0ao6+X1+o7t/v6o+m+SuqropyVeSvH3r0+Rcd6oLogAAnElOO567+0tJvn+D8f+d5K1bmRQAAJyJXGEQAACGxDMAAAyJZwAAGBLPAAAwJJ4BAGBIPAMAwJB4BgCAIfEMAABD4hkAAIbEMwAADIlnAAAYEs8AADAkngEAYEg8AwDA0N5VTwBerH2H7nne2LHD165gJgDA+cbKMwAADIlnAAAYEs8AADAkngEAYEg8AwDAkHgGAIAh8QwAAEPiGQAAhsQzAAAMiWcAABhyeW5YbHTZ78SlvwGAb7HyDAAAQ+IZAACGxDMAAAyJZwAAGBLPAAAwJJ4BAGBIPAMAwJDzPHNOcI5mAGA3WHkGAIAh8QwAAEPiGQAAhsQzAAAM+cAg57SNPkjoQ4QAwOmy8gwAAEPiGQAAhsQzAAAMOeaZ886pLqgCALAZ8QzbyAcUAeDc5rANAAAYsvIMp8GhHwBwfhLPsAmhDACc5LANAAAYEs8AADAkngEAYMgxz7AipzqWeqNT272YbQGAnWPlGQAAhsQzAAAMiWcAABgSzwAAMCSeAQBgSDwDAMCQeAYAgCHxDAAAQy6SAjvsVBc4AQDOPlaeAQBgSDwDAMCQeAYAgKHq7lXPIRdesr8vufGXVz0NOO8cO3ztqqcAALuqqh7o7gOn+3ofGASe51QfchTbAJzvHLYBAABDVp7hPOY0egDw4lh5BgCAISvPwJa8mOOjHUsNwNlOPANjDvMA4HznsA0AABiy8gzsCKvUAJyLrDwDAMDQjq08V9XVSf5Tkj1Jfq27D+/UzwLObhutUvsQIQBnoh2J56rak+Q/J/lnSY4n+WxV3d3dX9iJnwcgwAHYDTt12MaVSY5295e6+/8k+UiS63boZwEAwK6o7t7+b1r140mu7u5/tTx+Z5If6O73rNvmYJKDy8PvS/Lwtk+Es92rkvzlqifBGcd+wUbsF2zEfsFG/kF3v+x0X7xTxzzXBmP/X6V3921JbkuSqjrS3Qd2aC6cpewXbMR+wUbsF2zEfsFGqurIVl6/U4dtHE9y+brHlyV5fId+FgAA7IqdiufPJtlfVa+rqm9LckOSu3foZwEAwK7YkcM2uvvZqnpPkj/I2qnq7ujuR17gJbftxDw469kv2Ij9go3YL9iI/YKNbGm/2JEPDAIAwLnIFQYBAGBIPAMAwNDK47mqrq6qP6+qo1V1aNXzYXWq6lhVfb6qHjx5GpmqekVV3VdVX1xuX77qebKzquqOqnqqqh5eN7bhflBrPri8fzxUVW9c3czZSafYL36uqv5iec94sKquWffc+5b94s+r6kdWM2t2UlVdXlWfqKpHq+qRqnrvMu794jz2AvvFtr1frDSe113G+21JXp/kHVX1+lXOiZX7we6+Yt15OQ8lub+79ye5f3nMue1DSa5+ztip9oO3Jdm/fB1McusuzZHd96E8f79IkluW94wruvveJFn+Hbkhyfcur/mV5d8bzi3PJvnp7v6eJFcluXn5b+/94vx2qv0i2ab3i1WvPLuMN5u5Lsmdy/07k1y/wrmwC7r7j5J89TnDp9oPrkvy4V7zqSQXV9UluzNTdtMp9otTuS7JR7r7m9395SRHs/bvDeeQ7n6iuz+33P9GkkeTXBrvF+e1F9gvTuVFv1+sOp4vTfLYusfH88K/IOe2TvKHVfXAcvn2JHltdz+RrP0PkeQ1K5sdq3Sq/cB7CO9Z/gR/x7rDuuwX55mq2pfkDUk+He8XLJ6zXyTb9H6x6nje9DLenFfe1N1vzNqf1m6uqn+66glxxvMecn67Ncl3JbkiyRNJfnEZt1+cR6rqO5P8TpKf7O6/eqFNNxizX5yjNtgvtu39YtXx7DLe/D/d/fhy+1SSj2btzyZPnvyz2nL71OpmyAqdaj/wHnIe6+4nu/tEd/9tkl/Nt/7Uar84T1TVBVkLpF/v7t9dhr1fnOc22i+28/1i1fHsMt4kSarqO6rqZSfvJ/nhJA9nbX+4cdnsxiQfW80MWbFT7Qd3J3nX8in6q5I8ffLPtZz7nnO86o9l7T0jWdsvbqiqC6vqdVn7gNhndnt+7KyqqiS3J3m0u39p3VPeL85jp9ovtvP9Ykcuzz11Gpfx5tz12iQfXdvnszfJb3T371fVZ5PcVVU3JflKkrevcI7sgqr6zSRvTvKqqjqe5GeTHM7G+8G9Sa7J2gc8nkny7l2fMLviFPvFm6vqiqz9ifVYkp9Iku5+pKruSvKFrH3y/ubuPrGKebOj3pTknUk+X1UPLmPvj/eL892p9ot3bNf7hctzAwDA0KoP2wAAgLOGeAYAgCHxDAAAQ+IZAACGxDMAAAyJZwAAGBLPAAAw9H8Bhn7nnytwbCkAAAAASUVORK5CYII=\n",
      "text/plain": [
       "<Figure size 864x864 with 1 Axes>"
      ]
     },
     "metadata": {
      "needs_background": "light"
     },
     "output_type": "display_data"
    },
    {
     "data": {
      "image/png": "iVBORw0KGgoAAAANSUhEUgAAAs8AAAKvCAYAAACVhiLtAAAABHNCSVQICAgIfAhkiAAAAAlwSFlzAAALEgAACxIB0t1+/AAAADh0RVh0U29mdHdhcmUAbWF0cGxvdGxpYiB2ZXJzaW9uMy4xLjMsIGh0dHA6Ly9tYXRwbG90bGliLm9yZy+AADFEAAAeC0lEQVR4nO3df6zdd33f8dd7dgilsISfkWdHckS9DehUw7w0UqQpha6EeJqDRKagCSKUyUwKEqhoq+EfqDQkVxqkQlojmSXDTBSI+KFEOOuaBRDiDwIOTUNCivDAIyZWLAYYUNRMMZ/9cb8et/Zx7tu+P861/XhIV/ecz/mec98WX06e+t7v/Z4aYwQAAFja35v3AAAAcL4QzwAA0CSeAQCgSTwDAECTeAYAgCbxDAAATe14rqoNVfVXVfXF6f5VVfVgVX2vqj5TVc+b1i+d7h+aHt+6OqMDAMDaOpsjz+9O8vii+3+S5PYxxrYkP01y67R+a5KfjjF+K8nt03YAAHDea8VzVW1JsjPJf5nuV5LXJ/nstMn+JDdOt3dN9zM9/oZpewAAOK9tbG73p0n+Q5IXTfdfmuRnY4xnp/tHkmyebm9O8kSSjDGerarj0/Y/XvyCVbU7ye4kqUue/08veemW037oP9l8WfsfAgAAS3nooYd+PMZ4+bk+f8l4rqp/meTYGOOhqrru5PKMTUfjsV8vjLEvyb4kuXTTtrHplj897UkH9+5cajwAAGirqv+9nOd3jjxfm+RfVdUNSZ6f5O9n4Uj05VW1cTr6vCXJk9P2R5JcmeRIVW1MclmSnyxnSAAAWA+WPOd5jPG+McaWMcbWJDcn+dIY498k+XKSt0yb3ZLknun2vdP9TI9/aYxx2pFnAAA43yznOs9/lOQPq+pQFs5pvnNavzPJS6f1P0yyZ3kjAgDA+tD9g8EkyRjjK0m+Mt3+fpKrZ2zzt0luWoHZAABgXfEJgwAA0CSeAQCgSTwDAECTeAYAgCbxDAAATeIZAACaxDMAADSJZwAAaBLPAADQJJ4BAKBJPAMAQJN4BgCAJvEMAABN4hkAAJrEMwAANIlnAABoEs8AANAkngEAoEk8AwBAk3gGAIAm8QwAAE3iGQAAmsQzAAA0iWcAAGgSzwAA0CSeAQCgSTwDAECTeAYAgCbxDAAATeIZAACaxDMAADSJZwAAaBLPAADQJJ4BAKBJPAMAQJN4BgCAJvEMAABN4hkAAJrEMwAANIlnAABoEs8AANAkngEAoEk8AwBAk3gGAIAm8QwAAE3iGQAAmsQzAAA0iWcAAGgSzwAA0CSeAQCgSTwDAECTeAYAgCbxDAAATeIZAACaxDMAADSJZwAAaBLPAADQJJ4BAKBJPAMAQJN4BgCAJvEMAABN4hkAAJrEMwAANIlnAABoEs8AANAkngEAoEk8AwBAk3gGAIAm8QwAAE3iGQAAmsQzAAA0iWcAAGgSzwAA0LRkPFfV86vqG1X111X1WFX98bT+8ar6QVU9PH1tn9arqj5aVYeq6pGqet1q/yMAAGAtbGxs80yS148xfllVlyT5WlX99+mxfz/G+Owp278pybbp63eT3DF9BwCA89qSR57Hgl9Ody+ZvsZzPGVXkk9Mz/t6ksuratPyRwUAgPlqnfNcVRuq6uEkx5LcP8Z4cHroQ9OpGbdX1aXT2uYkTyx6+pFp7dTX3F1VB6vq4Imnjy/jnwAAAGujFc9jjBNjjO1JtiS5uqp+O8n7kvzjJP8syUuS/NG0ec16iRmvuW+MsWOMsWPDCy47p+EBAGAtndXVNsYYP0vylSTXjzGOTqdmPJPkvya5etrsSJIrFz1tS5InV2BWAACYq87VNl5eVZdPt38jye8n+ZuT5zFXVSW5Mcmj01PuTfL26aob1yQ5PsY4uirTAwDAGupcbWNTkv1VtSELsX33GOOLVfWlqnp5Fk7TeDjJv5u2vy/JDUkOJXk6yTtWfmwAAFh7S8bzGOORJK+dsf76M2w/kty2/NEAAGB98QmDAADQJJ4BAKBJPAMAQJN4BgCAJvEMAABN4hkAAJrEMwAANIlnAABoEs8AANAkngEAoEk8AwBAk3gGAIAm8QwAAE3iGQAAmsQzAAA0iWcAAGgSzwAA0CSeAQCgSTwDAECTeAYAgCbxDAAATeIZAACaxDMAADSJZwAAaBLPAADQJJ4BAKBJPAMAQJN4BgCAJvEMAABN4hkAAJrEMwAANIlnAABoEs8AANAkngEAoEk8AwBAk3gGAIAm8QwAAE3iGQAAmsQzAAA0iWcAAGgSzwAA0CSeAQCgSTwDAECTeAYAgCbxDAAATeIZAACaxDMAADSJZwAAaBLPAADQJJ4BAKBJPAMAQJN4BgCAJvEMAABN4hkAAJrEMwAANIlnAABoEs8AANAkngEAoGnjvAd4Llv3HDht7fDenXOYBAAAHHkGAIA28QwAAE3iGQAAmsQzAAA0iWcAAGgSzwAA0CSeAQCgSTwDAECTeAYAgCbxDAAATeIZAACaxDMAADSJZwAAaFoynqvq+VX1jar666p6rKr+eFq/qqoerKrvVdVnqup50/ql0/1D0+NbV/efAAAAa6Nz5PmZJK8fY/xOku1Jrq+qa5L8SZLbxxjbkvw0ya3T9rcm+ekY47eS3D5tBwAA570l43ks+OV095LpayR5fZLPTuv7k9w43d413c/0+BuqqlZsYgAAmJPWOc9VtaGqHk5yLMn9Sf5Xkp+NMZ6dNjmSZPN0e3OSJ5Jkevx4kpeu5NAAADAPrXgeY5wYY2xPsiXJ1UleNWuz6fuso8zj1IWq2l1VB6vq4Imnj3fnBQCAuTmrq22MMX6W5CtJrklyeVVtnB7akuTJ6faRJFcmyfT4ZUl+MuO19o0xdowxdmx4wWXnNj0AAKyhztU2Xl5Vl0+3fyPJ7yd5PMmXk7xl2uyWJPdMt++d7md6/EtjjNOOPAMAwPlm49KbZFOS/VW1IQuxffcY44tV9Z0kn66q/5jkr5LcOW1/Z5L/VlWHsnDE+eZVmBsAANbckvE8xngkyWtnrH8/C+c/n7r+t0luWpHpAABgHfEJgwAA0CSeAQCgSTwDAECTeAYAgCbxDAAATeIZAACaxDMAADSJZwAAaBLPAADQJJ4BAKBJPAMAQJN4BgCAJvEMAABN4hkAAJrEMwAANIlnAABoEs8AANAkngEAoEk8AwBAk3gGAIAm8QwAAE3iGQAAmsQzAAA0iWcAAGgSzwAA0CSeAQCgSTwDAECTeAYAgCbxDAAATeIZAACaxDMAADSJZwAAaBLPAADQJJ4BAKBJPAMAQJN4BgCAJvEMAABN4hkAAJrEMwAANIlnAABoEs8AANAkngEAoEk8AwBAk3gGAIAm8QwAAE3iGQAAmsQzAAA0iWcAAGgSzwAA0CSeAQCgaeO8B+Dv2rrnwMz1w3t3rvEkAACcypFnAABoEs8AANAkngEAoEk8AwBAk3gGAIAm8QwAAE3iGQAAmsQzAAA0iWcAAGgSzwAA0CSeAQCgSTwDAECTeAYAgCbxDAAATeIZAACaxDMAADSJZwAAaBLPAADQJJ4BAKBJPAMAQJN4BgCAJvEMAABNS8ZzVV1ZVV+uqser6rGqeve0/sGq+lFVPTx93bDoOe+rqkNV9d2qeuNq/gMAAGCtbGxs82yS944xvlVVL0ryUFXdPz12+xjjPy3euKpeneTmJK9J8g+S/M+q+odjjBMrOTgAAKy1JY88jzGOjjG+Nd3+RZLHk2x+jqfsSvLpMcYzY4wfJDmU5OqVGBYAAObprM55rqqtSV6b5MFp6V1V9UhV3VVVL57WNid5YtHTjmRGbFfV7qo6WFUHTzx9/KwHBwCAtdaO56p6YZLPJXnPGOPnSe5I8sok25McTfLhk5vOePo4bWGMfWOMHWOMHRtecNlZDw4AAGutFc9VdUkWwvmTY4zPJ8kY46kxxokxxq+SfCy/PjXjSJIrFz19S5InV25kAACYj87VNirJnUkeH2N8ZNH6pkWbvTnJo9Pte5PcXFWXVtVVSbYl+cbKjQwAAPPRudrGtUneluTbVfXwtPb+JG+tqu1ZOCXjcJJ3JskY47GqujvJd7JwpY7bXGkDAIALwZLxPMb4Wmafx3zfczznQ0k+tIy5AABg3fEJgwAA0NQ5bWNd2brnwMz1w3t3rvEkAABcbBx5BgCAJvEMAABN4hkAAJrEMwAANIlnAABoEs8AANAkngEAoEk8AwBAk3gGAIAm8QwAAE3iGQAAmsQzAAA0iWcAAGgSzwAA0CSeAQCgSTwDAECTeAYAgCbxDAAATeIZAACaxDMAADSJZwAAaBLPAADQJJ4BAKBJPAMAQJN4BgCAJvEMAABN4hkAAJrEMwAANIlnAABoEs8AANAkngEAoEk8AwBAk3gGAIAm8QwAAE3iGQAAmsQzAAA0iWcAAGgSzwAA0CSeAQCgSTwDAECTeAYAgCbxDAAATeIZAACaxDMAADSJZwAAaBLPAADQJJ4BAKBJPAMAQJN4BgCAJvEMAABN4hkAAJrEMwAANG2c9wAXg617DsxcP7x35xpPAgDAcjjyDAAATY48z9GZjkgDALA+OfIMAABN4hkAAJrEMwAANIlnAABoEs8AANAkngEAoEk8AwBAk3gGAIAm8QwAAE3iGQAAmsQzAAA0iWcAAGjaOO8B5mHrngMz1w/v3bnGkwAAcD5x5BkAAJou+CPPZzrKDAAAZ2vJI89VdWVVfbmqHq+qx6rq3dP6S6rq/qr63vT9xdN6VdVHq+pQVT1SVa9b7X8EAACshc5pG88mee8Y41VJrklyW1W9OsmeJA+MMbYleWC6nyRvSrJt+tqd5I4VnxoAAOZgyXgeYxwdY3xruv2LJI8n2ZxkV5L902b7k9w43d6V5BNjwdeTXF5Vm1Z8cgAAWGNn9QeDVbU1yWuTPJjkijHG0WQhsJO8Ytpsc5InFj3tyLQGAADntXY8V9ULk3wuyXvGGD9/rk1nrI0Zr7e7qg5W1cETTx/vjgEAAHPTutpGVV2ShXD+5Bjj89PyU1W1aYxxdDot49i0fiTJlYueviXJk6e+5hhjX5J9SXLppm2nxfX5yJU9AAAubJ2rbVSSO5M8Psb4yKKH7k1yy3T7liT3LFp/+3TVjWuSHD95egcAAJzPOkeer03ytiTfrqqHp7X3J9mb5O6qujXJD5PcND12X5IbkhxK8nSSd6zoxAAAMCdLxvMY42uZfR5zkrxhxvYjyW3LnAsAANYdH88NAABN4hkAAJrEMwAANLUuVXexmHWpucN7d85hEgAA1qMLJp5dYxkAgNXmtA0AAGgSzwAA0CSeAQCgSTwDAECTeAYAgCbxDAAATeIZAACaxDMAADSJZwAAaBLPAADQJJ4BAKBJPAMAQJN4BgCAJvEMAABN4hkAAJrEMwAANG2c9wDnq617Dsx7BAAA1pgjzwAA0CSeAQCgyWkbS3B6BgAAJznyDAAATeIZAACaxDMAADSJZwAAaBLPAADQJJ4BAKBJPAMAQJN4BgCAJvEMAABN4hkAAJrEMwAANIlnAABoEs8AANAkngEAoEk8AwBAk3gGAIAm8QwAAE3iGQAAmsQzAAA0bZz3APRs3XPgtLXDe3fOYRIAgIuXI88AANAkngEAoEk8AwBAk3gGAIAm8QwAAE3iGQAAmsQzAAA0iWcAAGgSzwAA0CSeAQCgSTwDAECTeAYAgCbxDAAATeIZAACaxDMAADSJZwAAaBLPAADQJJ4BAKBJPAMAQJN4BgCAJvEMAABN4hkAAJrEMwAANIlnAABoEs8AANC0cd4DcO627jkwc/3w3p1rPAkAwMXBkWcAAGgSzwAA0LRkPFfVXVV1rKoeXbT2war6UVU9PH3dsOix91XVoar6blW9cbUGBwCAtdY58vzxJNfPWL99jLF9+rovSarq1UluTvKa6Tl/VlUbVmpYAACYpyXjeYzx1SQ/ab7eriSfHmM8M8b4QZJDSa5exnwAALBuLOec53dV1SPTaR0vntY2J3li0TZHprXTVNXuqjpYVQdPPH18GWMAAMDaONd4viPJK5NsT3I0yYen9Zqx7Zj1AmOMfWOMHWOMHRtecNk5jgEAAGvnnOJ5jPHUGOPEGONXST6WX5+acSTJlYs23ZLkyeWNCAAA68M5xXNVbVp0981JTl6J494kN1fVpVV1VZJtSb6xvBEBAGB9WPITBqvqU0muS/KyqjqS5ANJrquq7Vk4JeNwkncmyRjjsaq6O8l3kjyb5LYxxonVGR0AANbWkvE8xnjrjOU7n2P7DyX50HKGAgCA9cgnDAIAQJN4BgCAJvEMAABN4hkAAJrEMwAANIlnAABoEs8AANAkngEAoEk8AwBAk3gGAIAm8QwAAE3iGQAAmsQzAAA0iWcAAGgSzwAA0CSeAQCgSTwDAECTeAYAgCbxDAAATeIZAACaxDMAADSJZwAAaBLPAADQJJ4BAKBJPAMAQJN4BgCAJvEMAABN4hkAAJrEMwAANIlnAABoEs8AANAkngEAoEk8AwBAk3gGAIAm8QwAAE3iGQAAmsQzAAA0iWcAAGgSzwAA0CSeAQCgSTwDAECTeAYAgCbxDAAATeIZAACaxDMAADSJZwAAaNo47wFYeVv3HDht7fDenXOYBADgwuLIMwAANIlnAABoEs8AANAkngEAoEk8AwBAk3gGAIAm8QwAAE3iGQAAmsQzAAA0iWcAAGgSzwAA0CSeAQCgSTwDAECTeAYAgCbxDAAATeIZAACaxDMAADSJZwAAaBLPAADQJJ4BAKBJPAMAQJN4BgCAJvEMAABN4hkAAJo2znsA1sbWPQdmrh/eu3ONJwEAOH8teeS5qu6qqmNV9eiitZdU1f1V9b3p+4un9aqqj1bVoap6pKpet5rDAwDAWuqctvHxJNefsrYnyQNjjG1JHpjuJ8mbkmybvnYnuWNlxgQAgPlbMp7HGF9N8pNTlncl2T/d3p/kxkXrnxgLvp7k8qratFLDAgDAPJ3rHwxeMcY4miTT91dM65uTPLFouyPTGgAAnPdW+mobNWNtzNywandVHayqgyeePr7CYwAAwMo713h+6uTpGNP3Y9P6kSRXLtpuS5InZ73AGGPfGGPHGGPHhhdcdo5jAADA2jnXeL43yS3T7VuS3LNo/e3TVTeuSXL85OkdAABwvlvyOs9V9akk1yV5WVUdSfKBJHuT3F1Vtyb5YZKbps3vS3JDkkNJnk7yjlWYGQAA5mLJeB5jvPUMD71hxrYjyW3LHQoAANYjH88NAABN4hkAAJrEMwAANIlnAABoEs8AANAkngEAoEk8AwBAk3gGAIAm8QwAAE3iGQAAmsQzAAA0iWcAAGgSzwAA0CSeAQCgSTwDAECTeAYAgKaN8x6A+dq658DM9cN7d67xJAAA658jzwAA0CSeAQCgSTwDAECTeAYAgCbxDAAATeIZAACaxDMAADSJZwAAaBLPAADQJJ4BAKBJPAMAQJN4BgCAJvEMAABN4hkAAJrEMwAANIlnAABoEs8AANAkngEAoEk8AwBAk3gGAIAm8QwAAE3iGQAAmsQzAAA0iWcAAGgSzwAA0CSeAQCgSTwDAECTeAYAgCbxDAAATeIZAACaxDMAADSJZwAAaBLPAADQtHHeA7A+bd1z4LS1w3t3zmESAID1w5FnAABoEs8AANAkngEAoEk8AwBAk3gGAIAm8QwAAE3iGQAAmsQzAAA0iWcAAGgSzwAA0CSeAQCgSTwDAECTeAYAgCbxDAAATeIZAACaxDMAADSJZwAAaBLPAADQJJ4BAKBp47wH4Py3dc+B09YO7905h0kAAFaXeKZtViQDAFxMnLYBAABNyzryXFWHk/wiyYkkz44xdlTVS5J8JsnWJIeT/Osxxk+XNyYAAMzfShx5/r0xxvYxxo7p/p4kD4wxtiV5YLoPAADnvdU4bWNXkv3T7f1JblyFnwEAAGtuufE8kvxlVT1UVbuntSvGGEeTZPr+illPrKrdVXWwqg6eePr4MscAAIDVt9yrbVw7xniyql6R5P6q+pvuE8cY+5LsS5JLN20by5wDAABW3bKOPI8xnpy+H0vyhSRXJ3mqqjYlyfT92HKHBACA9eCc47mqfrOqXnTydpI/SPJoknuT3DJtdkuSe5Y7JAAArAfLOW3jiiRfqKqTr/PnY4y/qKpvJrm7qm5N8sMkNy1/TAAAmL9zjucxxveT/M6M9f+T5A3LGQoAANYjnzAIAABN4hkAAJrEMwAANIlnAABoEs8AANAkngEAoEk8AwBA03I+JAXO2tY9B2auH967c40nAQA4e448AwBAk3gGAIAm8QwAAE3iGQAAmsQzAAA0iWcAAGgSzwAA0CSeAQCgSTwDAECTeAYAgCbxDAAATRvnPQCcydY9B2auH967c40nAQBYIJ5ZFWcK35XaHgBgHpy2AQAATeIZAACaxDMAADSJZwAAaBLPAADQJJ4BAKBJPAMAQJN4BgCAJvEMAABN4hkAAJrEMwAANIlnAABo2jjvAeBsbd1z4LS1w3t3zmESAOBi48gzAAA0OfLMBWHW0ejEEWkAYGU58gwAAE3iGQAAmsQzAAA0iWcAAGjyB4Nc0FzWDgBYSY48AwBAk3gGAIAm8QwAAE3iGQAAmsQzAAA0iWcAAGgSzwAA0CSeAQCgSTwDAECTeAYAgCbxDAAATeIZAACaxDMAADSJZwAAaBLPAADQJJ4BAKBJPAMAQNPGeQ8A68XWPQdmrh/eu3NZr3E2zwcA1jfxzEXnTJEMALAUp20AAECTeAYAgCbxDAAATeIZAACaxDMAADSJZwAAaHKpOlhlK3H9aABgfXDkGQAAmhx5hiWs1qcGOiINAOcf8QzrjI/4BoD1y2kbAADQ5MgznIMznXIBAFzYHHkGAICmVYvnqrq+qr5bVYeqas9q/RwAAFgrq3LaRlVtSPKfk/yLJEeSfLOq7h1jfGc1fh5crFbr9JH18AeKrkYCwHq0Wkeer05yaIzx/THG/03y6SS7VulnAQDAmqgxxsq/aNVbklw/xvi30/23JfndMca7Fm2zO8nu6e5vJ3l0xQfhfPeyJD+e9xCsO/YLZrFfMIv9gln+0RjjRef65NW62kbNWPs7lT7G2JdkX5JU1cExxo5VmoXzlP2CWewXzGK/YBb7BbNU1cHlPH+1Tts4kuTKRfe3JHlylX4WAACsidWK528m2VZVV1XV85LcnOTeVfpZAACwJlbltI0xxrNV9a4k/yPJhiR3jTEee46n7FuNOTjv2S+YxX7BLPYLZrFfMMuy9otV+YNBAAC4EPmEQQAAaBLPAADQNPd49jHenFRVh6vq21X18MnLyFTVS6rq/qr63vT9xfOek9VVVXdV1bGqenTR2sz9oBZ8dHr/eKSqXje/yVlNZ9gvPlhVP5reMx6uqhsWPfa+ab/4blW9cT5Ts5qq6sqq+nJVPV5Vj1XVu6d17xcXsefYL1bs/WKu8bzoY7zflOTVSd5aVa+e50zM3e+NMbYvui7nniQPjDG2JXlgus+F7eNJrj9l7Uz7wZuSbJu+die5Y41mZO19PKfvF0ly+/SesX2McV+STP8duTnJa6bn/Nn03xsuLM8mee8Y41VJrkly2/S/vfeLi9uZ9otkhd4v5n3k2cd4s5RdSfZPt/cnuXGOs7AGxhhfTfKTU5bPtB/sSvKJseDrSS6vqk1rMylr6Qz7xZnsSvLpMcYzY4wfJDmUhf/ecAEZYxwdY3xruv2LJI8n2RzvFxe159gvzuSs3y/mHc+bkzyx6P6RPPc/kAvbSPKXVfXQ9PHtSXLFGONosvB/iCSvmNt0zNOZ9gPvIbxr+hX8XYtO67JfXGSqamuS1yZ5MN4vmJyyXyQr9H4x73he8mO8uahcO8Z4XRZ+tXZbVf3zeQ/Euuc95OJ2R5JXJtme5GiSD0/r9ouLSFW9MMnnkrxnjPHz59p0xpr94gI1Y79YsfeLecezj/Hm/xtjPDl9P5bkC1n4tclTJ3+tNn0/Nr8JmaMz7QfeQy5iY4ynxhgnxhi/SvKx/PpXrfaLi0RVXZKFQPrkGOPz07L3i4vcrP1iJd8v5h3PPsabJElV/WZVvejk7SR/kOTRLOwPt0yb3ZLknvlMyJydaT+4N8nbp7+ivybJ8ZO/ruXCd8r5qm/OwntGsrBf3FxVl1bVVVn4A7FvrPV8rK6qqiR3Jnl8jPGRRQ95v7iInWm/WMn3i1X5eO6uc/gYby5cVyT5wsI+n41J/nyM8RdV9c0kd1fVrUl+mOSmOc7IGqiqTyW5LsnLqupIkg8k2ZvZ+8F9SW7Iwh94PJ3kHWs+MGviDPvFdVW1PQu/Yj2c5J1JMsZ4rKruTvKdLPzl/W1jjBPzmJtVdW2StyX5dlU9PK29P94vLnZn2i/eulLvFz6eGwAAmuZ92gYAAJw3xDMAADSJZwAAaBLPAADQJJ4BAKBJPAMAQJN4BgCApv8HepfOfNXq0SoAAAAASUVORK5CYII=\n",
      "text/plain": [
       "<Figure size 864x864 with 1 Axes>"
      ]
     },
     "metadata": {
      "needs_background": "light"
     },
     "output_type": "display_data"
    },
    {
     "data": {
      "image/png": "iVBORw0KGgoAAAANSUhEUgAAAs8AAAKvCAYAAACVhiLtAAAABHNCSVQICAgIfAhkiAAAAAlwSFlzAAALEgAACxIB0t1+/AAAADh0RVh0U29mdHdhcmUAbWF0cGxvdGxpYiB2ZXJzaW9uMy4xLjMsIGh0dHA6Ly9tYXRwbG90bGliLm9yZy+AADFEAAAd+UlEQVR4nO3dbaxlZ3nf4f9djwMhoTbvcmxLg5JpG5Iqhk4dS0gVgTQBT1UTKVRGFVjI1aSSkYgStRnyJYlUpInU4AipQXJqiqmSECsJwsrQNNSAonzgZSCOsXEQU5jiiS2sFHCIrFB5cvfDWVNO7T0+t+e87Hm5Lulo7/3stfd5jry856fnrLNWdXcAAICt/b11TwAAAC4U4hkAAIbEMwAADIlnAAAYEs8AADAkngEAYGgcz1V1WVX9WVX94fL45VX1qar6UlX9blV91zL+nOXxieX5/bszdQAA2FvPZuX5HUke2vT4V5Pc3t0Hknwjya3L+K1JvtHdP5Dk9mU7AAC44I3iuaquSXIoyX9eHleS1yb5vWWTu5K8cbl/0/I4y/OvW7YHAIAL2r7hdr+e5N8nef7y+EVJvtndTy6PTyW5erl/dZKHk6S7n6yqx5ft/2rzG1bV4SSHk6Quf+4/ufxF1zztm/7jq68Y/yAAALCVz372s3/V3S8519dvGc9V9S+SPNbdn62q15wZXrFpD577zkD3HUnuSJLnXHWgr7rl15/2ouNHD201PQAAGKuq/7Wd109Wnl+d5F9W1Y1Jnpvk72djJfrKqtq3rD5fk+SRZftTSa5Ncqqq9iW5IsnXtzNJAAA4H2x5zHN3v7O7r+nu/UluTvKx7v7XST6e5KeXzW5J8uHl/j3L4yzPf6y7n7byDAAAF5rtnOf5F5L8XFWdyMYxzXcu43cmedEy/nNJjmxvigAAcH6Y/sFgkqS7P5HkE8v9Lye5fsU2f5vkTTswNwAAOK+4wiAAAAyJZwAAGBLPAAAwJJ4BAGBIPAMAwJB4BgCAIfEMAABD4hkAAIbEMwAADIlnAAAYEs8AADAkngEAYEg8AwDAkHgGAIAh8QwAAEPiGQAAhsQzAAAMiWcAABgSzwAAMCSeAQBgSDwDAMCQeAYAgCHxDAAAQ+IZAACGxDMAAAyJZwAAGBLPAAAwJJ4BAGBIPAMAwJB4BgCAIfEMAABD4hkAAIbEMwAADIlnAAAYEs8AADAkngEAYEg8AwDAkHgGAIAh8QwAAEPiGQAAhsQzAAAMiWcAABgSzwAAMCSeAQBgSDwDAMCQeAYAgCHxDAAAQ+IZAACGxDMAAAyJZwAAGBLPAAAwJJ4BAGBIPAMAwJB4BgCAIfEMAABD4hkAAIbEMwAADIlnAAAYEs8AADAkngEAYEg8AwDAkHgGAIAh8QwAAEPiGQAAhsQzAAAMiWcAABgSzwAAMCSeAQBgSDwDAMCQeAYAgCHxDAAAQ+IZAACGxDMAAAxtGc9V9dyq+nRV/XlVPVhVv7KMv7+qvlJV9y1f1y3jVVXvqaoTVXV/Vb1qt38IAADYC/sG23w7yWu7+2+q6vIkf1pV/2157t919+89Zfs3JDmwfP1okvcutwAAcEHbcuW5N/zN8vDy5auf4SU3JfnA8rpPJrmyqq7a/lQBAGC9Rsc8V9VlVXVfkseSfLS7P7U89a7l0Izbq+o5y9jVSR7e9PJTy9hT3/NwVR2vquOnn3h8Gz8CAADsjVE8d/fp7r4uyTVJrq+qH07yziT/KMk/TfLCJL+wbF6r3mLFe97R3Qe7++Blz7vinCYPAAB76VmdbaO7v5nkE0le392PLodmfDvJf0ly/bLZqSTXbnrZNUke2YG5AgDAWk3OtvGSqrpyuf/dSX48yV+cOY65qirJG5M8sLzkniRvXc66cUOSx7v70V2ZPQAA7KHJ2TauSnJXVV2Wjdi+u7v/sKo+VlUvycZhGvcl+bfL9h9JcmOSE0meSPK2nZ82AADsvS3jubvvT/LKFeOvPcv2neS27U8NAADOL64wCAAAQ+IZAACGxDMAAAyJZwAAGBLPAAAwJJ4BAGBIPAMAwJB4BgCAIfEMAABD4hkAAIbEMwAADIlnAAAYEs8AADAkngEAYEg8AwDAkHgGAIAh8QwAAEPiGQAAhsQzAAAMiWcAABgSzwAAMCSeAQBgSDwDAMCQeAYAgCHxDAAAQ/vWPYFnsv/IsaeNnTx6aA0zAQAAK88AADAmngEAYEg8AwDAkHgGAIAh8QwAAEPiGQAAhsQzAAAMiWcAABgSzwAAMCSeAQBgSDwDAMCQeAYAgCHxDAAAQ+IZAACGxDMAAAyJZwAAGBLPAAAwJJ4BAGBIPAMAwJB4BgCAIfEMAABD4hkAAIbEMwAADIlnAAAYEs8AADAkngEAYEg8AwDAkHgGAIAh8QwAAEPiGQAAhsQzAAAMiWcAABgSzwAAMCSeAQBgSDwDAMCQeAYAgCHxDAAAQ+IZAACGxDMAAAyJZwAAGBLPAAAwJJ4BAGBIPAMAwJB4BgCAIfEMAABD4hkAAIa2jOeqem5Vfbqq/ryqHqyqX1nGX15Vn6qqL1XV71bVdy3jz1ken1ie37+7PwIAAOyNycrzt5O8trt/JMl1SV5fVTck+dUkt3f3gSTfSHLrsv2tSb7R3T+Q5PZlOwAAuOBtGc+94W+Wh5cvX53ktUl+bxm/K8kbl/s3LY+zPP+6qqodmzEAAKzJ6Jjnqrqsqu5L8liSjyb5n0m+2d1PLpucSnL1cv/qJA8nyfL840letJOTBgCAdRjFc3ef7u7rklyT5PokP7hqs+V21SpzP3Wgqg5X1fGqOn76icen8wUAgLV5Vmfb6O5vJvlEkhuSXFlV+5anrknyyHL/VJJrk2R5/ookX1/xXnd098HuPnjZ8644t9kDAMAempxt4yVVdeVy/7uT/HiSh5J8PMlPL5vdkuTDy/17lsdZnv9Ydz9t5RkAAC40+7beJFcluauqLstGbN/d3X9YVV9I8sGq+g9J/izJncv2dyb5r1V1IhsrzjfvwrwBAGDPbRnP3X1/kleuGP9yNo5/fur43yZ5047MDgAAziOuMAgAAEPiGQAAhsQzAAAMTf5gkD20/8ixleMnjx7a45kAAPBUF1w8i0sAANbFYRsAADAkngEAYEg8AwDAkHgGAIAh8QwAAEPiGQAAhsQzAAAMiWcAABgSzwAAMCSeAQBgSDwDAMCQeAYAgCHxDAAAQ+IZAACGxDMAAAyJZwAAGBLPAAAwJJ4BAGBIPAMAwJB4BgCAIfEMAABD4hkAAIbEMwAADIlnAAAYEs8AADAkngEAYEg8AwDAkHgGAIAh8QwAAEPiGQAAhsQzAAAMiWcAABgSzwAAMCSeAQBgSDwDAMCQeAYAgCHxDAAAQ+IZAACGxDMAAAyJZwAAGBLPAAAwJJ4BAGBIPAMAwJB4BgCAIfEMAABD4hkAAIbEMwAADIlnAAAYEs8AADAkngEAYEg8AwDAkHgGAIAh8QwAAEPiGQAAhsQzAAAMiWcAABgSzwAAMCSeAQBgSDwDAMCQeAYAgCHxDAAAQ+IZAACGxDMAAAyJZwAAGBLPAAAwJJ4BAGBIPAMAwJB4BgCAoS3juaquraqPV9VDVfVgVb1jGf/lqvrLqrpv+bpx02veWVUnquqLVfWTu/kDAADAXtk32ObJJD/f3Z+rqucn+WxVfXR57vbu/o+bN66qVyS5OckPJfm+JP+jqv5Bd5/eyYkDAMBe23Llubsf7e7PLfe/leShJFc/w0tuSvLB7v52d38lyYkk1+/EZAEAYJ2e1THPVbU/ySuTfGoZentV3V9V76uqFyxjVyd5eNPLTmVFbFfV4ao6XlXHTz/x+LOeOAAA7LVxPFfV9yb5/SQ/291/neS9Sb4/yXVJHk3ya2c2XfHyftpA9x3dfbC7D172vCue9cQBAGCvjeK5qi7PRjj/Vnf/QZJ099e6+3R3/12S38x3Ds04leTaTS+/JskjOzdlAABYj8nZNirJnUke6u53bxq/atNmP5XkgeX+PUlurqrnVNXLkxxI8umdmzIAAKzH5Gwbr07yliSfr6r7lrFfTPLmqrouG4dknEzyM0nS3Q9W1d1JvpCNM3Xc5kwbAABcDLaM5+7+06w+jvkjz/CadyV51zbmBQAA5x1XGAQAgCHxDAAAQ+IZAACGxDMAAAyJZwAAGBLPAAAwJJ4BAGBIPAMAwJB4BgCAIfEMAABD4hkAAIbEMwAADIlnAAAYEs8AADAkngEAYEg8AwDAkHgGAIAh8QwAAEPiGQAAhsQzAAAMiWcAABgSzwAAMCSeAQBgaN+6J3Ax2X/k2Mrxk0cP7fFMAADYDVaeAQBgSDwDAMCQeAYAgCHxDAAAQ+IZAACGxDMAAAyJZwAAGBLPAAAw5CIpe8DFUwAALg5WngEAYEg8AwDAkHgGAIAh8QwAAEPiGQAAhsQzAAAMiWcAABgSzwAAMCSeAQBgSDwDAMCQeAYAgCHxDAAAQ+IZAACGxDMAAAyJZwAAGBLPAAAwJJ4BAGBo37oncCnbf+TYuqcAAMCzYOUZAACGxDMAAAyJZwAAGBLPAAAwJJ4BAGDI2TbOkTNlAABceqw8AwDAkHgGAIAh8QwAAEPiGQAAhsQzAAAMiWcAABi66E9Vt+qUciePHlrDTAAAuNBZeQYAgCHxDAAAQ+IZAACGxDMAAAyJZwAAGBLPAAAwJJ4BAGBIPAMAwNCW8VxV11bVx6vqoap6sKresYy/sKo+WlVfWm5fsIxXVb2nqk5U1f1V9ard/iEAAGAvTFaen0zy8939g0luSHJbVb0iyZEk93b3gST3Lo+T5A1JDixfh5O8d8dnDQAAa7BlPHf3o939ueX+t5I8lOTqJDcluWvZ7K4kb1zu35TkA73hk0murKqrdnzmAACwx57VMc9VtT/JK5N8KsnLuvvRZCOwk7x02ezqJA9vetmpZQwAAC5o43iuqu9N8vtJfra7//qZNl0x1ive73BVHa+q46efeHw6DQAAWJtRPFfV5dkI59/q7j9Yhr925nCM5faxZfxUkms3vfyaJI889T27+47uPtjdBy973hXnOn8AANgzk7NtVJI7kzzU3e/e9NQ9SW5Z7t+S5MObxt+6nHXjhiSPnzm8AwAALmT7Btu8Oslbkny+qu5bxn4xydEkd1fVrUm+muRNy3MfSXJjkhNJnkjyth2d8VnsP3JsL74NAACXsC3jubv/NKuPY06S163YvpPcts15AQDAeccVBgEAYGhy2MYlzeEgAACcYeUZAACGxDMAAAyJZwAAGBLPAAAwJJ4BAGBIPAMAwJB4BgCAIfEMAABD4hkAAIbEMwAADIlnAAAYEs8AADAkngEAYEg8AwDAkHgGAIAh8QwAAEPiGQAAhsQzAAAMiWcAABgSzwAAMCSeAQBgSDwDAMCQeAYAgCHxDAAAQ+IZAACG9q17Auuw/8ixleMnjx7a45kAAHAhsfIMAABD4hkAAIbEMwAADIlnAAAYEs8AADAkngEAYEg8AwDAkHgGAIAh8QwAAEPiGQAAhsQzAAAMiWcAABgSzwAAMCSeAQBgSDwDAMCQeAYAgCHxDAAAQ+IZAACGxDMAAAyJZwAAGBLPAAAwJJ4BAGBIPAMAwJB4BgCAIfEMAABD4hkAAIbEMwAADIlnAAAYEs8AADAkngEAYEg8AwDAkHgGAIAh8QwAAEPiGQAAhsQzAAAMiWcAABgSzwAAMLRv3RNgZv+RY08bO3n00BpmAgBw6bLyDAAAQ+IZAACGxDMAAAyJZwAAGBLPAAAwJJ4BAGBIPAMAwNCW8VxV76uqx6rqgU1jv1xVf1lV9y1fN2567p1VdaKqvlhVP7lbEwcAgL02WXl+f5LXrxi/vbuvW74+kiRV9YokNyf5oeU1v1FVl+3UZAEAYJ22jOfu/pMkXx++301JPtjd3+7uryQ5keT6bcwPAADOG9s55vntVXX/cljHC5axq5M8vGmbU8vY01TV4ao6XlXHTz/x+DamAQAAe+Nc4/m9Sb4/yXVJHk3ya8t4rdi2V71Bd9/R3Qe7++Blz7viHKcBAAB755ziubu/1t2nu/vvkvxmvnNoxqkk127a9Jokj2xvigAAcH7Ydy4vqqqruvvR5eFPJTlzJo57kvx2Vb07yfclOZDk09ue5R7Zf+TYuqcAAMB5bMt4rqrfSfKaJC+uqlNJfinJa6rqumwcknEyyc8kSXc/WFV3J/lCkieT3Nbdp3dn6gAAsLe2jOfufvOK4TufYft3JXnXdiYFAADnI1cYBACAIfEMAABD4hkAAIbEMwAADIlnAAAYEs8AADAkngEAYEg8AwDAkHgGAIAh8QwAAEPiGQAAhsQzAAAMiWcAABgSzwAAMCSeAQBgSDwDAMCQeAYAgCHxDAAAQ+IZAACGxDMAAAyJZwAAGBLPAAAwJJ4BAGBIPAMAwJB4BgCAIfEMAABD4hkAAIbEMwAADIlnAAAYEs8AADAkngEAYEg8AwDA0L51T4Bzt//IsZXjJ48e2uOZAABcGqw8AwDAkHgGAIAh8QwAAEPiGQAAhsQzAAAMiWcAABgSzwAAMOQ8zxehVed/du5nAIDts/IMAABD4hkAAIbEMwAADIlnAAAYEs8AADAkngEAYEg8AwDAkHgGAIAh8QwAAEPiGQAAhsQzAAAMiWcAABgSzwAAMCSeAQBgSDwDAMCQeAYAgCHxDAAAQ+IZAACGxDMAAAyJZwAAGBLPAAAwJJ4BAGBIPAMAwJB4BgCAIfEMAABD4hkAAIbEMwAADIlnAAAYEs8AADAkngEAYEg8AwDA0JbxXFXvq6rHquqBTWMvrKqPVtWXltsXLONVVe+pqhNVdX9VvWo3Jw8AAHtpsvL8/iSvf8rYkST3dveBJPcuj5PkDUkOLF+Hk7x3Z6YJAADrt2U8d/efJPn6U4ZvSnLXcv+uJG/cNP6B3vDJJFdW1VU7NVkAAFincz3m+WXd/WiSLLcvXcavTvLwpu1OLWMAAHDB2+k/GKwVY71yw6rDVXW8qo6ffuLxHZ4GAADsvHON56+dORxjuX1sGT+V5NpN212T5JFVb9Ddd3T3we4+eNnzrjjHaQAAwN4513i+J8kty/1bknx40/hbl7Nu3JDk8TOHdwAAwIVu31YbVNXvJHlNkhdX1akkv5TkaJK7q+rWJF9N8qZl848kuTHJiSRPJHnbLswZAADWYst47u43n+Wp163YtpPctt1JAQDA+cgVBgEAYEg8AwDAkHgGAIAh8QwAAEPiGQAAhsQzAAAMiWcAABgSzwAAMCSeAQBgSDwDAMCQeAYAgKF9654Ae2P/kWMrx08ePbTHMwEAuHBZeQYAgCHxDAAAQ+IZAACGxDMAAAyJZwAAGBLPAAAwJJ4BAGBIPAMAwJB4BgCAIfEMAABD4hkAAIbEMwAADIlnAAAYEs8AADAkngEAYEg8AwDAkHgGAIAh8QwAAEPiGQAAhsQzAAAMiWcAABgSzwAAMCSeAQBgSDwDAMCQeAYAgKF9654A67X/yLGV4yePHtrjmQAAnP+sPAMAwJB4BgCAIfEMAABD4hkAAIbEMwAADIlnAAAYEs8AADAkngEAYEg8AwDAkHgGAIAh8QwAAEPiGQAAhvatewKcn/YfOfa0sZNHD61hJgAA5w8rzwAAMCSeAQBgSDwDAMCQeAYAgCHxDAAAQ+IZAACGxDMAAAyJZwAAGBLPAAAwJJ4BAGBIPAMAwJB4BgCAIfEMAABD4hkAAIbEMwAADIlnAAAYEs8AADAkngEAYEg8AwDAkHgGAIChfeueABeO/UeOrRw/efTQHs8EAGA9rDwDAMDQtlaeq+pkkm8lOZ3kye4+WFUvTPK7SfYnOZnkX3X3N7Y3TQAAWL+dWHn+se6+rrsPLo+PJLm3uw8kuXd5DAAAF7zdOOb5piSvWe7fleQTSX5hF74P54lVx0I7DhoAuBhtd+W5k/xxVX22qg4vYy/r7keTZLl96aoXVtXhqjpeVcdPP/H4NqcBAAC7b7srz6/u7keq6qVJPlpVfzF9YXffkeSOJHnOVQd6m/MAAIBdt62V5+5+ZLl9LMmHklyf5GtVdVWSLLePbXeSAABwPjjneK6q76mq55+5n+QnkjyQ5J4ktyyb3ZLkw9udJAAAnA+2c9jGy5J8qKrOvM9vd/cfVdVnktxdVbcm+WqSN21/mgAAsH7nHM/d/eUkP7Ji/H8ned12JgUAAOcjVxgEAIAh8QwAAEO7cZEUWHnhlMTFUwCAC5uVZwAAGBLPAAAwJJ4BAGBIPAMAwJA/GGRP+UNCAOBCZuUZAACGxDMAAAyJZwAAGBLPAAAwJJ4BAGBIPAMAwJBT1XHeclo7AOB8Y+UZAACGxDMAAAyJZwAAGBLPAAAwJJ4BAGDI2TY4L5ztzBoAAOcTK88AADAkngEAYEg8AwDAkHgGAIAh8QwAAEPiGQAAhsQzAAAMiWcAABgSzwAAMCSeAQBgSDwDAMDQvnVPAJ6t/UeOPW3s5NFDa5gJAHCpsfIMAABD4hkAAIbEMwAADIlnAAAYEs8AADAkngEAYEg8AwDAkHgGAIAh8QwAAEPiGQAAhsQzAAAMiWcAABgSzwAAMCSeAQBgSDwDAMCQeAYAgCHxDAAAQ/vWPQHYCfuPHFs5fvLooT2eCQBwMbPyDAAAQ+IZAACGHLbBJcchHgDAubLyDAAAQ+IZAACGHLbBRe1sh2gAAJwLK88AADAkngEAYEg8AwDAkHgGAIAh8QwAAEPiGQAAhpyqDraw6nR3rkYIAJcmK88AADAkngEAYMhhG7BwNUIAYCtWngEAYMjKM5yDnVil9keHAHDhsfIMAABD4hkAAIYctgFrcrZDP1YdzvFsDhNxOAgA7B4rzwAAMLRr8VxVr6+qL1bViao6slvfBwAA9squHLZRVZcl+U9J/nmSU0k+U1X3dPcXduP7Ad+xE4eDPJtDP3biPQDgQrFbK8/XJznR3V/u7v+T5INJbtql7wUAAHuiunvn37Tqp5O8vrv/zfL4LUl+tLvfvmmbw0kOLw9/OMkDOz4RLnQvTvJX654E5x37BavYL1jFfsEq/7C7n3+uL96ts23UirH/r9K7+44kdyRJVR3v7oO7NBcuUPYLVrFfsIr9glXsF6xSVce38/rdOmzjVJJrNz2+Jskju/S9AABgT+xWPH8myYGqenlVfVeSm5Pcs0vfCwAA9sSuHLbR3U9W1duT/PcklyV5X3c/+AwvuWM35sEFz37BKvYLVrFfsIr9glW2tV/syh8MAgDAxcgVBgEAYEg8AwDA0Nrj2WW8OaOqTlbV56vqvjOnkamqF1bVR6vqS8vtC9Y9T3ZXVb2vqh6rqgc2ja3cD2rDe5bPj/ur6lXrmzm76Sz7xS9X1V8unxn3VdWNm55757JffLGqfnI9s2Y3VdW1VfXxqnqoqh6sqncs4z4vLmHPsF/s2OfFWuN502W835DkFUneXFWvWOecWLsf6+7rNp2X80iSe7v7QJJ7l8dc3N6f5PVPGTvbfvCGJAeWr8NJ3rtHc2TvvT9P3y+S5PblM+O67v5Ikiz/jtyc5IeW1/zG8u8NF5cnk/x8d/9gkhuS3Lb8t/d5cWk7236R7NDnxbpXnl3Gm63clOSu5f5dSd64xrmwB7r7T5J8/SnDZ9sPbkrygd7wySRXVtVVezNT9tJZ9ouzuSnJB7v72939lSQnsvHvDReR7n60uz+33P9WkoeSXB2fF5e0Z9gvzuZZf16sO56vTvLwpsen8sw/IBe3TvLHVfXZ5fLtSfKy7n402fgfIslL1zY71uls+4HPEN6+/Ar+fZsO67JfXGKqan+SVyb5VHxesHjKfpHs0OfFuuN5y8t4c0l5dXe/Khu/Wrutqv7ZuifEec9nyKXtvUm+P8l1SR5N8mvLuP3iElJV35vk95P8bHf/9TNtumLMfnGRWrFf7Njnxbrj2WW8+X+6+5Hl9rEkH8rGr02+dubXasvtY+ubIWt0tv3AZ8glrLu/1t2nu/vvkvxmvvOrVvvFJaKqLs9GIP1Wd//BMuzz4hK3ar/Yyc+Ldcezy3iTJKmq76mq55+5n+QnkjyQjf3hlmWzW5J8eD0zZM3Oth/ck+Sty1/R35Dk8TO/ruXi95TjVX8qG58ZycZ+cXNVPaeqXp6NPxD79F7Pj91VVZXkziQPdfe7Nz3l8+ISdrb9Yic/L3bl8txT53AZby5eL0vyoY19PvuS/HZ3/1FVfSbJ3VV1a5KvJnnTGufIHqiq30nymiQvrqpTSX4pydGs3g8+kuTGbPyBxxNJ3rbnE2ZPnGW/eE1VXZeNX7GeTPIzSdLdD1bV3Um+kI2/vL+tu0+vY97sqlcneUuSz1fVfcvYL8bnxaXubPvFm3fq88LluQEAYGjdh20AAMAFQzwDAMCQeAYAgCHxDAAAQ+IZAACGxDMAAAyJZwAAGPq/lCTWhBM3rV8AAAAASUVORK5CYII=\n",
      "text/plain": [
       "<Figure size 864x864 with 1 Axes>"
      ]
     },
     "metadata": {
      "needs_background": "light"
     },
     "output_type": "display_data"
    },
    {
     "data": {
      "image/png": "iVBORw0KGgoAAAANSUhEUgAAAs8AAAKvCAYAAACVhiLtAAAABHNCSVQICAgIfAhkiAAAAAlwSFlzAAALEgAACxIB0t1+/AAAADh0RVh0U29mdHdhcmUAbWF0cGxvdGxpYiB2ZXJzaW9uMy4xLjMsIGh0dHA6Ly9tYXRwbG90bGliLm9yZy+AADFEAAAeGUlEQVR4nO3dbaxl51nf4f9dj3EIpHbe5dqWJoJpS6DCSV1jKVIVEgqOp6qNRCpHVWJFroZKjhQEapnwBZAaaZAKppGKpQGncSogWEAUi3EprpMI8SEv42AcOybKNJnGgy1bNIkJskjl4e6Hs9wc7DM+98x52fNyXdLR2fvZa+3zHGV5zy/PWXvt6u4AAACb+3urngAAAJwrxDMAAAyJZwAAGBLPAAAwJJ4BAGBIPAMAwNA4nqvqoqr606r6g+X+66rq01X1par6nar6jmX8kuX+seXxvTszdQAA2F2ns/L83iSPrrv/S0lu7+59Sb6e5NZl/NYkX+/u701y+7IdAACc80bxXFVXJtmf5DeW+5XkLUl+d9nkriQ3LbdvXO5nefyty/YAAHBO2zPc7leT/IckL1vuvzLJN7r72eX+iSRXLLevSPJYknT3s1X19LL9X65/wqo6kORAktTFL/mnF7/yyhf80H9yxaXjXwQAADbzwAMP/GV3v/pM9980nqvqXyZ5qrsfqKo3Pze8waY9eOzbA92HkxxOkksu39eX3/KrL9jp6KH9m00PAADGqup/b2X/ycrzm5L8q6q6IclLkvz9rK1EX1ZVe5bV5yuTPL5sfyLJVUlOVNWeJJcm+dpWJgkAAGeDTc957u73dfeV3b03yc1JPt7d/ybJJ5L8xLLZLUk+tty+Z7mf5fGPd/cLVp4BAOBcs5XrPP9skp+uqmNZO6f5zmX8ziSvXMZ/OsnBrU0RAADODtM3DCZJuvuTST653P5ykms32OZvkrx9G+YGAABnFZ8wCAAAQ+IZAACGxDMAAAyJZwAAGBLPAAAwJJ4BAGBIPAMAwJB4BgCAIfEMAABD4hkAAIbEMwAADIlnAAAYEs8AADAkngEAYEg8AwDAkHgGAIAh8QwAAEPiGQAAhsQzAAAMiWcAABgSzwAAMCSeAQBgSDwDAMCQeAYAgCHxDAAAQ+IZAACGxDMAAAyJZwAAGBLPAAAwJJ4BAGBIPAMAwJB4BgCAIfEMAABD4hkAAIbEMwAADIlnAAAYEs8AADAkngEAYEg8AwDAkHgGAIAh8QwAAEPiGQAAhsQzAAAMiWcAABgSzwAAMCSeAQBgSDwDAMCQeAYAgCHxDAAAQ+IZAACGxDMAAAyJZwAAGBLPAAAwJJ4BAGBIPAMAwJB4BgCAIfEMAABD4hkAAIbEMwAADIlnAAAYEs8AADAkngEAYEg8AwDAkHgGAIAh8QwAAEPiGQAAhsQzAAAMiWcAABgSzwAAMCSeAQBgSDwDAMCQeAYAgCHxDAAAQ5vGc1W9pKo+U1V/VlWPVNUvLuMfqqqvVNWDy9fVy3hV1Qeq6lhVPVRVb9zpXwIAAHbDnsE230rylu7+66q6OMmfVNV/Xx779939u8/b/m1J9i1fP5TkjuU7AACc0zZdee41f73cvXj56hfZ5cYkH172+1SSy6rq8q1PFQAAVmt0znNVXVRVDyZ5Ksl93f3p5aH3L6dm3F5VlyxjVyR5bN3uJ5ax5z/ngao6WlVHTz7z9BZ+BQAA2B2jeO7uk919dZIrk1xbVT+Q5H1J/nGSf5bkFUl+dtm8NnqKDZ7zcHdf093XXPTSS89o8gAAsJtO62ob3f2NJJ9Mcn13P7GcmvGtJP81ybXLZieSXLVutyuTPL4NcwUAgJWaXG3j1VV12XL7O5P8SJI/f+485qqqJDcleXjZ5Z4k71quunFdkqe7+4kdmT0AAOyiydU2Lk9yV1VdlLXYvru7/6CqPl5Vr87aaRoPJvl3y/b3JrkhybEkzyR59/ZPGwAAdt+m8dzdDyV5wwbjbznF9p3ktq1PDQAAzi4+YRAAAIbEMwAADIlnAAAYEs8AADAkngEAYEg8AwDAkHgGAIAh8QwAAEPiGQAAhsQzAAAMiWcAABgSzwAAMLRn1RN4MXsPHnnB2PFD+1cwEwAAsPIMAABj4hkAAIbEMwAADIlnAAAYEs8AADAkngEAYEg8AwDAkHgGAIAh8QwAAEPiGQAAhsQzAAAMiWcAABgSzwAAMCSeAQBgSDwDAMCQeAYAgCHxDAAAQ+IZAACGxDMAAAyJZwAAGBLPAAAwJJ4BAGBIPAMAwJB4BgCAIfEMAABD4hkAAIbEMwAADIlnAAAYEs8AADAkngEAYEg8AwDAkHgGAIAh8QwAAEPiGQAAhsQzAAAMiWcAABgSzwAAMCSeAQBgSDwDAMCQeAYAgCHxDAAAQ+IZAACGxDMAAAyJZwAAGBLPAAAwJJ4BAGBIPAMAwJB4BgCAIfEMAABD4hkAAIbEMwAADIlnAAAYEs8AADAkngEAYEg8AwDAkHgGAIAh8QwAAEPiGQAAhsQzAAAMbRrPVfWSqvpMVf1ZVT1SVb+4jL+uqj5dVV+qqt+pqu9Yxi9Z7h9bHt+7s78CAADsjsnK87eSvKW7fzDJ1Umur6rrkvxSktu7e1+Srye5ddn+1iRf7+7vTXL7sh0AAJzzNo3nXvPXy92Ll69O8pYkv7uM35XkpuX2jcv9LI+/tapq22YMAAArMjrnuaouqqoHkzyV5L4k/yvJN7r72WWTE0muWG5fkeSxJFkefzrJK7dz0gAAsAqjeO7uk919dZIrk1yb5Ps22mz5vtEqcz9/oKoOVNXRqjp68pmnp/MFAICVOa2rbXT3N5J8Msl1SS6rqj3LQ1cmeXy5fSLJVUmyPH5pkq9t8FyHu/ua7r7mopdeemazBwCAXTS52sarq+qy5fZ3JvmRJI8m+USSn1g2uyXJx5bb9yz3szz+8e5+wcozAACca/ZsvkkuT3JXVV2Utdi+u7v/oKq+kOQjVfUfk/xpkjuX7e9M8t+q6ljWVpxv3oF5AwDArts0nrv7oSRv2GD8y1k7//n543+T5O3bMjsAADiL+IRBAAAYEs8AADAkngEAYEg8AwDAkHgGAIAh8QwAAEPiGQAAhsQzAAAMiWcAABgSzwAAMCSeAQBgSDwDAMCQeAYAgCHxDAAAQ+IZAACGxDMAAAyJZwAAGBLPAAAwJJ4BAGBIPAMAwJB4BgCAIfEMAABD4hkAAIbEMwAADIlnAAAYEs8AADAkngEAYEg8AwDAkHgGAIAh8QwAAEPiGQAAhsQzAAAMiWcAABgSzwAAMCSeAQBgSDwDAMCQeAYAgCHxDAAAQ+IZAACG9qx6Aqdr78EjG44fP7R/l2cCAMCFxsozAAAMiWcAABgSzwAAMCSeAQBgSDwDAMCQeAYAgCHxDAAAQ+IZAACGxDMAAAyJZwAAGBLPAAAwJJ4BAGBIPAMAwJB4BgCAIfEMAABD4hkAAIbEMwAADIlnAAAYEs8AADAkngEAYEg8AwDAkHgGAIAh8QwAAEPiGQAAhsQzAAAMiWcAABgSzwAAMCSeAQBgSDwDAMCQeAYAgCHxDAAAQ+IZAACGxDMAAAxtGs9VdVVVfaKqHq2qR6rqvcv4L1TVX1TVg8vXDev2eV9VHauqL1bVj+3kLwAAALtlz2CbZ5P8THd/rqpeluSBqrpveez27v5P6zeuqtcnuTnJ9yf5B0n+Z1X9w+4+uZ0TBwCA3bbpynN3P9Hdn1tufzPJo0mueJFdbkzyke7+Vnd/JcmxJNdux2QBAGCVTuuc56ram+QNST69DL2nqh6qqg9W1cuXsSuSPLZutxPZILar6kBVHa2qoyefefq0Jw4AALttHM9V9d1Jfi/JT3X3XyW5I8n3JLk6yRNJfvm5TTfYvV8w0H24u6/p7msueumlpz1xAADYbaN4rqqLsxbOv9ndv58k3f1kd5/s7r9N8uv59qkZJ5JctW73K5M8vn1TBgCA1ZhcbaOS3Jnk0e7+lXXjl6/b7MeTPLzcvifJzVV1SVW9Lsm+JJ/ZvikDAMBqTK628aYk70zy+ap6cBn7uSTvqKqrs3ZKxvEkP5kk3f1IVd2d5AtZu1LHba60AQDA+WDTeO7uP8nG5zHf+yL7vD/J+7cwLwAAOOv4hEEAABgSzwAAMCSeAQBgSDwDAMCQeAYAgCHxDAAAQ+IZAACGxDMAAAyJZwAAGBLPAAAwJJ4BAGBIPAMAwJB4BgCAIfEMAABD4hkAAIb2rHoC/F17Dx7ZcPz4of27PBMAAJ7PyjMAAAyJZwAAGBLPAAAwJJ4BAGBIPAMAwJB4BgCAIfEMAABD4hkAAIbEMwAADIlnAAAYEs8AADAkngEAYGjPqiewXfYePLLh+PFD+3d5JgAAnK+sPAMAwJB4BgCAIfEMAABD4hkAAIbEMwAADIlnAAAYEs8AADAkngEAYEg8AwDAkHgGAIAh8QwAAEPiGQAAhsQzAAAMiWcAABgSzwAAMCSeAQBgSDwDAMCQeAYAgCHxDAAAQ+IZAACGxDMAAAyJZwAAGBLPAAAwJJ4BAGBIPAMAwJB4BgCAIfEMAABD4hkAAIbEMwAADIlnAAAYEs8AADAkngEAYEg8AwDAkHgGAIAh8QwAAEPiGQAAhsQzAAAMiWcAABgSzwAAMCSeAQBgSDwDAMCQeAYAgCHxDAAAQ5vGc1VdVVWfqKpHq+qRqnrvMv6Kqrqvqr60fH/5Ml5V9YGqOlZVD1XVG3f6lwAAgN0wWXl+NsnPdPf3JbkuyW1V9fokB5Pc3937kty/3E+StyXZt3wdSHLHts8aAABWYNN47u4nuvtzy+1vJnk0yRVJbkxy17LZXUluWm7fmOTDveZTSS6rqsu3feYAALDLTuuc56ram+QNST6d5LXd/USyFthJXrNsdkWSx9btdmIZAwCAc9o4nqvqu5P8XpKf6u6/erFNNxjrDZ7vQFUdraqjJ595ejoNAABYmVE8V9XFWQvn3+zu31+Gn3zudIzl+1PL+IkkV63b/cokjz//Obv7cHdf093XXPTSS890/gAAsGsmV9uoJHcmebS7f2XdQ/ckuWW5fUuSj60bf9dy1Y3rkjz93OkdAABwLtsz2OZNSd6Z5PNV9eAy9nNJDiW5u6puTfLVJG9fHrs3yQ1JjiV5Jsm7t3XGAACwIpvGc3f/STY+jzlJ3rrB9p3kti3OCwAAzjqTledz2t6DR14wdvzQ/hXMBACAc52P5wYAgCHxDAAAQ+IZAACGxDMAAAyJZwAAGBLPAAAwJJ4BAGDovL/O827a6JrSietKAwCcL6w8AwDAkHgGAIAh8QwAAEPiGQAAhsQzAAAMiWcAABgSzwAAMCSeAQBgSDwDAMCQeAYAgCHxDAAAQ+IZAACGxDMAAAyJZwAAGBLPAAAwJJ4BAGBIPAMAwJB4BgCAIfEMAABD4hkAAIbEMwAADIlnAAAYEs8AADC0Z9UTOFftPXhk1VMAAGCXWXkGAIAh8QwAAEPiGQAAhsQzAAAMecPgCnnTIQDAucXKMwAADIlnAAAYEs8AADAkngEAYEg8AwDAkHgGAIChC/JSdae6RNzxQ/t3eSYAAJxLrDwDAMCQeAYAgCHxDAAAQ+IZAACGxDMAAAyJZwAAGBLPAAAwJJ4BAGBIPAMAwJB4BgCAoQvy47lPx6k+yhsAgAuPlWcAABiy8ryOVWYAAF6MlWcAABgSzwAAMCSeAQBgSDwDAMCQeAYAgCHxDAAAQ+IZAACGxDMAAAyJZwAAGBLPAAAwJJ4BAGBIPAMAwJB4BgCAIfEMAABD4hkAAIY2jeeq+mBVPVVVD68b+4Wq+ouqenD5umHdY++rqmNV9cWq+rGdmjgAAOy2ycrzh5Jcv8H47d199fJ1b5JU1euT3Jzk+5d9fq2qLtquyQIAwCptGs/d/cdJvjZ8vhuTfKS7v9XdX0lyLMm1W5gfAACcNbZyzvN7quqh5bSOly9jVyR5bN02J5axF6iqA1V1tKqOnnzm6S1MAwAAdseZxvMdSb4nydVJnkjyy8t4bbBtb/QE3X24u6/p7msueumlZzgNAADYPWcUz939ZHef7O6/TfLr+fapGSeSXLVu0yuTPL61KQIAwNnhjOK5qi5fd/fHkzx3JY57ktxcVZdU1euS7Evyma1NEQAAzg57Ntugqn47yZuTvKqqTiT5+SRvrqqrs3ZKxvEkP5kk3f1IVd2d5AtJnk1yW3ef3JmpAwDA7to0nrv7HRsM3/ki278/yfu3MikAADgb+YRBAAAYEs8AADAkngEAYEg8AwDAkHgGAIAh8QwAAEObXqqOrdt78MiqpwAAwDaw8gwAAEPiGQAAhsQzAAAMiWcAABgSzwAAMCSeAQBgSDwDAMCQeAYAgCHxDAAAQ+IZAACGxDMAAAyJZwAAGNqz6gmw/fYePPKCseOH9q9gJgAA5xcrzwAAMCSeAQBgSDwDAMCQeAYAgCFvGDxHeBMgAMDqWXkGAIAh8QwAAEPiGQAAhsQzAAAMiWcAABgSzwAAMCSeAQBgSDwDAMCQeAYAgCHxDAAAQ+IZAACGxDMAAAyJZwAAGNqz6glw5vYePLLqKQAAXFCsPAMAwJCV5wvEqVapjx/av8szAQA4d1l5BgCAIfEMAABD4hkAAIbEMwAADHnD4AXOGwkBAOasPAMAwJB4BgCAIfEMAABD4hkAAIbEMwAADIlnAAAYEs8AADAkngEAYEg8AwDAkHgGAIAh8QwAAEPiGQAAhsQzAAAMiWcAABgSzwAAMCSeAQBgSDwDAMCQeAYAgCHxDAAAQ+IZAACGxDMAAAyJZwAAGBLPAAAwJJ4BAGBIPAMAwJB4BgCAoU3juao+WFVPVdXD68ZeUVX3VdWXlu8vX8arqj5QVceq6qGqeuNOTh4AAHbTZOX5Q0muf97YwST3d/e+JPcv95PkbUn2LV8HktyxPdMEAIDV2zSeu/uPk3ztecM3JrlruX1XkpvWjX+413wqyWVVdfl2TRYAAFbpTM95fm13P5Eky/fXLONXJHls3XYnljEAADjnbfcbBmuDsd5ww6oDVXW0qo6efObpbZ4GAABsvz1nuN+TVXV5dz+xnJbx1DJ+IslV67a7MsnjGz1Bdx9OcjhJLrl834aBzersPXjkBWPHD+1fwUwAAM4eZ7ryfE+SW5bbtyT52Lrxdy1X3bguydPPnd4BAADnuk1Xnqvqt5O8OcmrqupEkp9PcijJ3VV1a5KvJnn7svm9SW5IcizJM0nevQNzBgCAldg0nrv7Had46K0bbNtJbtvqpAAA4GzkEwYBAGBIPAMAwJB4BgCAIfEMAABD4hkAAIbEMwAADIlnAAAYEs8AADAkngEAYEg8AwDAkHgGAIAh8QwAAEPiGQAAhsQzAAAMiWcAABgSzwAAMCSeAQBgSDwDAMCQeAYAgCHxDAAAQ+IZAACGxDMAAAyJZwAAGBLPAAAwJJ4BAGBIPAMAwJB4BgCAIfEMAABD4hkAAIbEMwAADIlnAAAYEs8AADAkngEAYEg8AwDAkHgGAIChPaueAOeOvQePbDh+/ND+XZ4JAMBqWHkGAIAh8QwAAEPiGQAAhsQzAAAMiWcAABgSzwAAMCSeAQBgSDwDAMCQeAYAgCHxDAAAQ+IZAACGxDMAAAyJZwAAGBLPAAAwtGfVE+Dct/fgkReMHT+0fwUzAQDYWVaeAQBgSDwDAMCQeAYAgCHxDAAAQ94wyFlrozciJt6MCACsjpVnAAAYEs8AADDktA12lVMxAIBzmZVnAAAYsvLMjjjVCjMAwLnMyjMAAAyJZwAAGBLPAAAwJJ4BAGBIPAMAwJB4BgCAIfEMAABD4hkAAIbEMwAADIlnAAAYEs8AADAkngEAYGjPVnauquNJvpnkZJJnu/uaqnpFkt9JsjfJ8ST/uru/vrVpAgDA6m3HyvMPd/fV3X3Ncv9gkvu7e1+S+5f7AABwztuJ0zZuTHLXcvuuJDftwM8AAIBdt9V47iR/VFUPVNWBZey13f1EkizfX7PRjlV1oKqOVtXRk888vcVpAADAztvSOc9J3tTdj1fVa5LcV1V/Pt2xuw8nOZwkl1y+r7c4DwAA2HFbWnnu7seX708l+WiSa5M8WVWXJ8ny/amtThIAAM4GZxzPVfVdVfWy524n+dEkDye5J8kty2a3JPnYVicJAABng62ctvHaJB+tquee57e6+w+r6rNJ7q6qW5N8Ncnbtz5NAABYvTOO5+7+cpIf3GD8/yR561YmxYVn78Ejq54CAMCmfMIgAAAMiWcAABgSzwAAMCSeAQBgSDwDAMCQeAYAgCHxDAAAQ+IZAACGxDMAAAyJZwAAGBLPAAAwJJ4BAGBIPAMAwJB4BgCAIfEMAABD4hkAAIbEMwAADIlnAAAYEs8AADAkngEAYEg8AwDAkHgGAIAh8QwAAEPiGQAAhvasegJwuvYePPKCseOH9q9gJgDAhUY8c17YKKgTUQ0AbC+nbQAAwJB4BgCAIfEMAABD4hkAAIbEMwAADIlnAAAYEs8AADAkngEAYEg8AwDAkE8Y5ILj0wgBgDNl5RkAAIbEMwAADIlnAAAYEs8AADAkngEAYEg8AwDAkHgGAIAh8QwAAEPiGQAAhsQzAAAMiWcAABgSzwAAMCSeAQBgSDwDAMCQeAYAgKE9q54A7KS9B4+segoAwHnEyjMAAAyJZwAAGBLPAAAwJJ4BAGBIPAMAwJB4BgCAIfEMAABD4hkAAIbEMwAADPmEQViczqcRHj+0fwdnAgCcraw8AwDAkJVnOAOnWqW2Ig0A5zcrzwAAMCSeAQBgSDwDAMCQeAYAgCFvGIRttNEbCb2JEADOH1aeAQBgSDwDAMCQ0zZgRXb7WtGnc0qJ61gDwMasPAMAwNCOrTxX1fVJ/nOSi5L8Rncf2qmfBWezU63ins72VnwB4OywI/FcVRcl+S9J/kWSE0k+W1X3dPcXduLnwfnudAJ8J0N7q2G/k7/HVk9L8X9QAJjYqdM2rk1yrLu/3N3/N8lHkty4Qz8LAAB2RXX39j9p1U8kub67/+1y/51Jfqi737NumwNJDix3fyDJw9s+Ec51r0ryl6ueBGcdxwUbcVywEccFG/lH3f2yM915p855rg3G/k6ld/fhJIeTpKqOdvc1OzQXzlGOCzbiuGAjjgs24rhgI1V1dCv779RpGyeSXLXu/pVJHt+hnwUAALtip+L5s0n2VdXrquo7ktyc5J4d+lkAALArduS0je5+tqrek+R/ZO1SdR/s7kdeZJfDOzEPznmOCzbiuGAjjgs24rhgI1s6LnbkDYMAAHA+8gmDAAAwJJ4BAGBo5fFcVddX1Rer6lhVHVz1fFidqjpeVZ+vqgefu4xMVb2iqu6rqi8t31++6nmys6rqg1X1VFU9vG5sw+Og1nxgef14qKreuLqZs5NOcVz8QlX9xfKa8WBV3bDusfctx8UXq+rHVjNrdlJVXVVVn6iqR6vqkap67zLu9eIC9iLHxba9Xqw0ntd9jPfbkrw+yTuq6vWrnBMr98PdffW663IeTHJ/d+9Lcv9yn/Pbh5Jc/7yxUx0Hb0uyb/k6kOSOXZoju+9DeeFxkSS3L68ZV3f3vUmy/Dtyc5LvX/b5teXfG84vzyb5me7+viTXJblt+d/e68WF7VTHRbJNrxerXnn2Md5s5sYkdy2370py0wrnwi7o7j9O8rXnDZ/qOLgxyYd7zaeSXFZVl+/OTNlNpzguTuXGJB/p7m9191eSHMvavzecR7r7ie7+3HL7m0keTXJFvF5c0F7kuDiV0369WHU8X5HksXX3T+TFf0HOb53kj6rqgeXj25Pktd39RLL2H0SS16xsdqzSqY4DryG8Z/kT/AfXndbluLjAVNXeJG9I8ul4vWDxvOMi2abXi1XH86Yf480F5U3d/cas/Wnttqr656ueEGc9ryEXtjuSfE+Sq5M8keSXl3HHxQWkqr47ye8l+anu/qsX23SDMcfFeWqD42LbXi9WHc8+xpv/r7sfX74/leSjWfuzyZPP/Vlt+f7U6mbICp3qOPAacgHr7ie7+2R3/22SX8+3/9TquLhAVNXFWQuk3+zu31+GvV5c4DY6Lrbz9WLV8exjvEmSVNV3VdXLnrud5EeTPJy14+GWZbNbknxsNTNkxU51HNyT5F3Lu+ivS/L0c3+u5fz3vPNVfzxrrxnJ2nFxc1VdUlWvy9obxD6z2/NjZ1VVJbkzyaPd/SvrHvJ6cQE71XGxna8XO/Lx3FNn8DHenL9em+Sja8d89iT5re7+w6r6bJK7q+rWJF9N8vYVzpFdUFW/neTNSV5VVSeS/HySQ9n4OLg3yQ1Ze4PHM0nevesTZlec4rh4c1VdnbU/sR5P8pNJ0t2PVNXdSb6QtXfe39bdJ1cxb3bUm5K8M8nnq+rBZezn4vXiQneq4+Id2/V64eO5AQBgaNWnbQAAwDlDPAMAwJB4BgCAIfEMAABD4hkAAIbEMwAADIlnAAAY+n+7KN6uhMKSDgAAAABJRU5ErkJggg==\n",
      "text/plain": [
       "<Figure size 864x864 with 1 Axes>"
      ]
     },
     "metadata": {
      "needs_background": "light"
     },
     "output_type": "display_data"
    },
    {
     "data": {
      "image/png": "iVBORw0KGgoAAAANSUhEUgAAAs8AAAKvCAYAAACVhiLtAAAABHNCSVQICAgIfAhkiAAAAAlwSFlzAAALEgAACxIB0t1+/AAAADh0RVh0U29mdHdhcmUAbWF0cGxvdGxpYiB2ZXJzaW9uMy4xLjMsIGh0dHA6Ly9tYXRwbG90bGliLm9yZy+AADFEAAAd5ElEQVR4nO3dbahl53nf4f/dGUWOE1fyO9ORYEwybeOkZOxOFYGhOHaa2FKpFIiLTLGFUZkUZHBIaDPOlyRQgwJNZAyNQKlcyyWJI5IYi0hNo8o2IR/8MnIUWbJiPI2n1kRCIrWtOIi6aHL3w1lTn0pndG7Nednzcl1wOHs/e60zz8HLWz+es/Za1d0BAAA293dWPQEAADhfiGcAABgSzwAAMCSeAQBgSDwDAMCQeAYAgKFxPFfVnqr606r6g+X566rqs1X1lar6nar6rmX80uX58eX1AzszdQAA2F0vZuX5fUkeXff8V5Lc2t0Hk3wjyU3L+E1JvtHd35/k1mU7AAA4743iuaquSHJtkv+0PK8kb0nyu8smdya5fnl83fI8y+tvXbYHAIDz2t7hdh9M8u+SvGx5/sok3+zuZ5fnJ5PsXx7vT/JYknT3s1X19LL9X63/gVV1JMmRJKlLXvKPL3nlFc/7R//R/svGvwgAAGzmgQce+KvufvXZ7r9pPFfVP0/yVHc/UFVvPj28waY9eO07A923J7k9SS7dd7D33fjB5+107JZrN5seAACMVdX/3Mr+k5XnNyX5F1V1TZKXJPm7WVuJvryq9i6rz1ckeXzZ/mSSK5OcrKq9SS5L8vWtTBIAAM4Fm57z3N3v7+4ruvtAkhuSfLK7/1WSTyX5qWWzG5N8Ynl89/I8y+uf7O7nrTwDAMD5ZivXef75JD9bVcezdk7zHcv4HUleuYz/bJKjW5siAACcG6YfGEySdPenk3x6efwXSa7aYJv/neQd2zA3AAA4p7jDIAAADIlnAAAYEs8AADAkngEAYEg8AwDAkHgGAIAh8QwAAEPiGQAAhsQzAAAMiWcAABgSzwAAMCSeAQBgSDwDAMCQeAYAgCHxDAAAQ+IZAACGxDMAAAyJZwAAGBLPAAAwJJ4BAGBIPAMAwJB4BgCAIfEMAABD4hkAAIbEMwAADIlnAAAYEs8AADAkngEAYEg8AwDAkHgGAIAh8QwAAEPiGQAAhsQzAAAMiWcAABgSzwAAMCSeAQBgSDwDAMCQeAYAgCHxDAAAQ+IZAACGxDMAAAyJZwAAGBLPAAAwJJ4BAGBIPAMAwJB4BgCAIfEMAABD4hkAAIbEMwAADIlnAAAYEs8AADAkngEAYEg8AwDAkHgGAIAh8QwAAEPiGQAAhsQzAAAMiWcAABgSzwAAMCSeAQBgSDwDAMCQeAYAgCHxDAAAQ+IZAACGxDMAAAyJZwAAGBLPAAAwJJ4BAGBIPAMAwJB4BgCAIfEMAABD4hkAAIbEMwAADG0az1X1kqr6XFX9WVU9UlW/vIx/pKq+WlUPLl+HlvGqqg9V1fGqeqiq3rjTvwQAAOyGvYNtvp3kLd39N1V1SZI/qar/urz2b7v7d5+z/duTHFy+fiTJbct3AAA4r2268txr/mZ5esny1S+wy3VJPrrs95kkl1fVvq1PFQAAVmt0znNV7amqB5M8leS+7v7s8tIHllMzbq2qS5ex/UkeW7f7yWXsuT/zSFUdq6pjp555egu/AgAA7I5RPHf3qe4+lOSKJFdV1Q8leX+Sf5jknyR5RZKfXzavjX7EBj/z9u4+3N2H97z0srOaPAAA7KYXdbWN7v5mkk8neVt3P7GcmvHtJP85yVXLZieTXLlutyuSPL4NcwUAgJWaXG3j1VV1+fL4u5P8WJI/P30ec1VVkuuTPLzscneSdy9X3bg6ydPd/cSOzB4AAHbR5Gob+5LcWVV7shbbd3X3H1TVJ6vq1Vk7TePBJP9m2f7eJNckOZ7kmSTv2f5pAwDA7ts0nrv7oSRv2GD8LWfYvpPcvPWpAQDAucUdBgEAYEg8AwDAkHgGAIAh8QwAAEPiGQAAhsQzAAAMiWcAABgSzwAAMCSeAQBgSDwDAMCQeAYAgCHxDAAAQ+IZAACGxDMAAAyJZwAAGBLPAAAwJJ4BAGBIPAMAwJB4BgCAIfEMAABD4hkAAIbEMwAADIlnAAAYEs8AADAkngEAYEg8AwDAkHgGAIAh8QwAAEPiGQAAhsQzAAAMiWcAABgSzwAAMCSeAQBgSDwDAMCQeAYAgCHxDAAAQ+IZAACGxDMAAAyJZwAAGBLPAAAwJJ4BAGBIPAMAwJB4BgCAIfEMAABD4hkAAIbEMwAADIlnAAAYEs8AADAkngEAYEg8AwDAkHgGAIAh8QwAAEPiGQAAhsQzAAAMiWcAABgSzwAAMCSeAQBgSDwDAMCQeAYAgCHxDAAAQ+IZAACGxDMAAAyJZwAAGBLPAAAwJJ4BAGBIPAMAwJB4BgCAIfEMAABD4hkAAIbEMwAADIlnAAAYEs8AADC0aTxX1Uuq6nNV9WdV9UhV/fIy/rqq+mxVfaWqfqeqvmsZv3R5fnx5/cDO/goAALA7JivP307ylu7+4SSHkrytqq5O8itJbu3ug0m+keSmZfubknyju78/ya3LdgAAcN7bNJ57zd8sTy9ZvjrJW5L87jJ+Z5Lrl8fXLc+zvP7WqqptmzEAAKzI6JznqtpTVQ8meSrJfUn+R5JvdvezyyYnk+xfHu9P8liSLK8/neSV2zlpAABYhVE8d/ep7j6U5IokVyX5gY02W75vtMrczx2oqiNVdayqjp165unpfAEAYGVe1NU2uvubST6d5Ookl1fV3uWlK5I8vjw+meTKJFlevyzJ1zf4Wbd39+HuPrznpZed3ewBAGAXTa628eqqunx5/N1JfizJo0k+leSnls1uTPKJ5fHdy/Msr3+yu5+38gwAAOebvZtvkn1J7qyqPVmL7bu6+w+q6ktJPlZV/z7Jnya5Y9n+jiT/paqOZ23F+YYdmDcAAOy6OhcWhS/dd7D33fjB0bYnbrl2h2cDAMCFqqoe6O7DZ7u/OwwCAMCQeAYAgCHxDAAAQ+IZAACGxDMAAAyJZwAAGBLPAAAwJJ4BAGBIPAMAwJB4BgCAIfEMAABD4hkAAIbEMwAADIlnAAAYEs8AADAkngEAYEg8AwDAkHgGAIAh8QwAAEPiGQAAhsQzAAAMiWcAABgSzwAAMCSeAQBgSDwDAMCQeAYAgCHxDAAAQ+IZAACGxDMAAAyJZwAAGBLPAAAwJJ4BAGBIPAMAwJB4BgCAIfEMAABD4hkAAIbEMwAADIlnAAAYEs8AADAkngEAYEg8AwDAkHgGAIAh8QwAAEPiGQAAhsQzAAAMiWcAABgSzwAAMCSeAQBgSDwDAMCQeAYAgCHxDAAAQ+IZAACGxDMAAAyJZwAAGBLPAAAwJJ4BAGBIPAMAwJB4BgCAIfEMAABD4hkAAIbEMwAADIlnAAAYEs8AADAkngEAYEg8AwDAkHgGAIAh8QwAAEPiGQAAhsQzAAAMiWcAABgSzwAAMCSeAQBgSDwDAMDQpvFcVVdW1aeq6tGqeqSq3reM/1JV/WVVPbh8XbNun/dX1fGq+nJV/cRO/gIAALBb9g62eTbJz3X3F6rqZUkeqKr7ltdu7e7/sH7jqnp9khuS/GCSv5fkv1fV3+/uU9s5cQAA2G2brjx39xPd/YXl8beSPJpk/wvscl2Sj3X3t7v7q0mOJ7lqOyYLAACr9KLOea6qA0nekOSzy9B7q+qhqvpwVb18Gduf5LF1u53MBrFdVUeq6lhVHTv1zNMveuIAALDbxvFcVd+b5PeS/Ex3/3WS25J8X5JDSZ5I8qunN91g937eQPft3X24uw/veellL3riAACw20bxXFWXZC2cf7O7fz9JuvvJ7j7V3X+b5DfynVMzTia5ct3uVyR5fPumDAAAqzG52kYluSPJo939a+vG963b7CeTPLw8vjvJDVV1aVW9LsnBJJ/bvikDAMBqTK628aYk70ryxap6cBn7hSTvrKpDWTsl40SSn06S7n6kqu5K8qWsXanjZlfaAADgQrBpPHf3n2Tj85jvfYF9PpDkA1uYFwAAnHPcYRAAAIbEMwAADIlnAAAYEs8AADA0udrGOeXA0Xs2HD9xy7W7PBMAAC42Vp4BAGBIPAMAwJB4BgCAIfEMAABD4hkAAIbEMwAADIlnAAAYEs8AADAkngEAYEg8AwDAkHgGAIAh8QwAAEPiGQAAhsQzAAAMiWcAABgSzwAAMCSeAQBgSDwDAMCQeAYAgCHxDAAAQ+IZAACGxDMAAAyJZwAAGBLPAAAwJJ4BAGBo76onsF0OHL1nw/ETt1y7yzPZmgvl9wAAuBBZeQYAgCHxDAAAQ+IZAACGxDMAAAyJZwAAGBLPAAAwJJ4BAGBIPAMAwJB4BgCAIfEMAABD4hkAAIbEMwAADIlnAAAYEs8AADAkngEAYEg8AwDAkHgGAIAh8QwAAEPiGQAAhsQzAAAMiWcAABgSzwAAMCSeAQBgSDwDAMCQeAYAgCHxDAAAQ+IZAACGxDMAAAyJZwAAGBLPAAAwJJ4BAGBIPAMAwNDeVU/gQnLg6D0bjp+45dpdngkAADvByjMAAAyJZwAAGBLPAAAwJJ4BAGBIPAMAwJB4BgCAIfEMAABD4hkAAIY2jeequrKqPlVVj1bVI1X1vmX8FVV1X1V9Zfn+8mW8qupDVXW8qh6qqjfu9C8BAAC7YbLy/GySn+vuH0hydZKbq+r1SY4mub+7Dya5f3meJG9PcnD5OpLktm2fNQAArMCm8dzdT3T3F5bH30ryaJL9Sa5Lcuey2Z1Jrl8eX5fko73mM0kur6p92z5zAADYZS/qnOeqOpDkDUk+m+S13f1EshbYSV6zbLY/yWPrdju5jAEAwHltHM9V9b1Jfi/Jz3T3X7/QphuM9QY/70hVHauqY6eeeXo6DQAAWJlRPFfVJVkL59/s7t9fhp88fTrG8v2pZfxkkivX7X5Fksef+zO7+/buPtzdh/e89LKznT8AAOyaydU2KskdSR7t7l9b99LdSW5cHt+Y5BPrxt+9XHXj6iRPnz69AwAAzmd7B9u8Kcm7knyxqh5cxn4hyS1J7qqqm5J8Lck7ltfuTXJNkuNJnknynm2d8S47cPSeDcdP3HLtLs8EAIBV2zSeu/tPsvF5zEny1g227yQ3b3FeAABwznGHQQAAGBLPAAAwJJ4BAGBIPAMAwJB4BgCAIfEMAABD4hkAAIbEMwAADIlnAAAYmtyemy1yi28AgAuDlWcAABgSzwAAMCSeAQBgSDwDAMDQBf+BwY0+rOeDegAAnA0rzwAAMHTBrzy/GGe6pNxWtwUA4MJg5RkAAIbEMwAADIlnAAAYEs8AADAkngEAYEg8AwDAkHgGAIAh8QwAAEPiGQAAhsQzAAAMiWcAABgSzwAAMCSeAQBgSDwDAMCQeAYAgCHxDAAAQ+IZAACGxDMAAAyJZwAAGBLPAAAwJJ4BAGBIPAMAwJB4BgCAIfEMAABD4hkAAIbEMwAADIlnAAAYEs8AADAkngEAYEg8AwDA0N5VT2AVDhy9Z9VTAADgPGTlGQAAhsQzAAAMiWcAABgSzwAAMHRRfmDwXOGDiwAA5xcrzwAAMCSeAQBgSDwDAMCQeAYAgCHxDAAAQ+IZAACGxDMAAAyJZwAAGBLPAAAwJJ4BAGBIPAMAwJB4BgCAIfEMAABD4hkAAIbEMwAADIlnAAAYEs8AADAkngEAYEg8AwDAkHgGAIChTeO5qj5cVU9V1cPrxn6pqv6yqh5cvq5Z99r7q+p4VX25qn5ipyYOAAC7bbLy/JEkb9tg/NbuPrR83ZskVfX6JDck+cFln1+vqj3bNVkAAFilTeO5u/84ydeHP++6JB/r7m9391eTHE9y1RbmBwAA54ytnPP83qp6aDmt4+XL2P4kj63b5uQy9jxVdaSqjlXVsVPPPL2FaQAAwO4423i+Lcn3JTmU5Ikkv7qM1wbb9kY/oLtv7+7D3X14z0svO8tpAADA7jmreO7uJ7v7VHf/bZLfyHdOzTiZ5Mp1m16R5PGtTREAAM4NZxXPVbVv3dOfTHL6Shx3J7mhqi6tqtclOZjkc1ubIgAAnBv2brZBVf12kjcneVVVnUzyi0neXFWHsnZKxokkP50k3f1IVd2V5EtJnk1yc3ef2pmpAwDA7to0nrv7nRsM3/EC238gyQe2MikAADgXucMgAAAMiWcAABgSzwAAMCSeAQBgSDwDAMCQeAYAgCHxDAAAQ+IZAACGxDMAAAyJZwAAGBLPAAAwJJ4BAGBIPAMAwJB4BgCAIfEMAABD4hkAAIbEMwAADIlnAAAYEs8AADAkngEAYEg8AwDAkHgGAIAh8QwAAEPiGQAAhsQzAAAMiWcAABgSzwAAMCSeAQBgSDwDAMCQeAYAgCHxDAAAQ+IZAACGxDMAAAyJZwAAGBLPAAAwJJ4BAGBIPAMAwJB4BgCAIfEMAABD4hkAAIbEMwAADIlnAAAYEs8AADAkngEAYEg8AwDAkHgGAIAh8QwAAEPiGQAAhsQzAAAMiWcAABjau+oJMHPg6D3PGztxy7UrmAkAwMXLyjMAAAyJZwAAGBLPAAAwJJ4BAGBIPAMAwJB4BgCAIfEMAABD4hkAAIbEMwAADIlnAAAYEs8AADAkngEAYEg8AwDAkHgGAIAh8QwAAEPiGQAAhsQzAAAMiWcAABgSzwAAMCSeAQBgSDwDAMDQpvFcVR+uqqeq6uF1Y6+oqvuq6ivL95cv41VVH6qq41X1UFW9cScnDwAAu2my8vyRJG97ztjRJPd398Ek9y/Pk+TtSQ4uX0eS3LY90wQAgNXbNJ67+4+TfP05w9cluXN5fGeS69eNf7TXfCbJ5VW1b7smCwAAq3S25zy/trufSJLl+2uW8f1JHlu33cllDAAAznvb/YHB2mCsN9yw6khVHauqY6eeeXqbpwEAANvvbOP5ydOnYyzfn1rGTya5ct12VyR5fKMf0N23d/fh7j6856WXneU0AABg95xtPN+d5Mbl8Y1JPrFu/N3LVTeuTvL06dM7AADgfLd3sw2q6reTvDnJq6rqZJJfTHJLkruq6qYkX0vyjmXze5Nck+R4kmeSvGcH5gwAACuxaTx39zvP8NJbN9i2k9y81UkBAMC5yB0GAQBgSDwDAMCQeAYAgCHxDAAAQ+IZAACGxDMAAAyJZwAAGBLPAAAwJJ4BAGBo0zsMcv45cPSe542duOXaFcwEAODCYuUZAACGxDMAAAyJZwAAGHLO83lso3ObAQDYOVaeAQBgSDwDAMCQeAYAgCHxDAAAQz4weJE704cO3VQFAOD5rDwDAMCQeAYAgCHxDAAAQ+IZAACGxDMAAAyJZwAAGBLPAAAwJJ4BAGDITVIuEme6GQoAAHNWngEAYMjKMxvaaKXaLbsBgIudlWcAABiy8syWWaUGAC4W4pkxHzoEAC52TtsAAIAh8QwAAEPiGQAAhsQzAAAMiWcAABgSzwAAMCSeAQBgSDwDAMCQeAYAgCHxDAAAQ+IZAACGxDMAAAyJZwAAGBLPAAAwJJ4BAGBIPAMAwJB4BgCAIfEMAABD4hkAAIbEMwAADIlnAAAYEs8AADC0d9UTgDM5cPSeDcdP3HLtLs8EAGCNlWcAABgSzwAAMOS0DXaEUy4AgAuRlWcAABgSzwAAMCSeAQBgSDwDAMCQeAYAgCHxDAAAQ+IZAACGxDMAAAyJZwAAGBLPAAAwJJ4BAGBIPAMAwNDeVU8AkuTA0XtWPQUAgE1ZeQYAgKEtrTxX1Ykk30pyKsmz3X24ql6R5HeSHEhyIsm/7O5vbG2aAACwetux8vyj3X2ouw8vz48mub+7Dya5f3kOAADnvZ04beO6JHcuj+9Mcv0O/BsAALDrthrPneSPquqBqjqyjL22u59IkuX7azbasaqOVNWxqjp26pmntzgNAADYeVu92sabuvvxqnpNkvuq6s+nO3b37UluT5JL9x3sLc4DAAB23JbiubsfX74/VVUfT3JVkieral93P1FV+5I8tQ3z5ALhknQAwPnsrE/bqKrvqaqXnX6c5MeTPJzk7iQ3LpvdmOQTW50kAACcC7ay8vzaJB+vqtM/57e6+w+r6vNJ7qqqm5J8Lck7tj5NAABYvbOO5+7+iyQ/vMH4/0ry1q1MCgAAzkXuMAgAAEPiGQAAhsQzAAAMiWcAABgSzwAAMCSeAQBgSDwDAMCQeAYAgCHxDAAAQ+IZAACGxDMAAAyJZwAAGBLPAAAwJJ4BAGBIPAMAwJB4BgCAIfEMAABDe1c9AXixDhy953ljJ265dgUzAQAuNlaeAQBgSDwDAMCQeAYAgCHxDAAAQ+IZAACGxDMAAAyJZwAAGBLPAAAwJJ4BAGBIPAMAwJB4BgCAIfEMAABD4hkAAIbEMwAADIlnAAAYEs8AADAkngEAYEg8AwDAkHgGAIAh8QwAAEN7Vz0B2A4Hjt6z4fiJW67d5ZkAABcyK88AADAkngEAYEg8AwDAkHgGAIAh8QwAAEPiGQAAhsQzAAAMuc4zF7SNrv/s2s8AwNmy8gwAAENWnrnouBshAHC2rDwDAMCQlWfYhPOmAYDTrDwDAMCQeAYAgCHxDAAAQ+IZAACGfGAQzsKLudzddlwaz+X1AODcIJ5hcaZABQA4zWkbAAAwJJ4BAGBIPAMAwJB4BgCAIfEMAABD4hkAAIZcqg5WxLWbAeD8Y+UZAACGxDMAAAyJZwAAGBLPAAAw5AODsI3O9CFAAODCIJ7hPLZRrLtaBwDsHKdtAADAUHX3queQS/cd7H03fnDV0wAWVq8BuFBV1QPdffhs97fyDAAAQzsWz1X1tqr6clUdr6qjO/XvAADAbtmRDwxW1Z4k/zHJP0tyMsnnq+ru7v7STvx7wPY6H28d7sOTAOyGnVp5virJ8e7+i+7+P0k+luS6Hfq3AABgV+zIBwar6qeSvK27//Xy/F1JfqS737tumyNJjixPfyjJw9s+Ec53r0ryV6ueBOccxwUbcVywEccFG/kH3f2ys915p67zXBuM/X+V3t23J7k9Sarq2FY+9ciFyXHBRhwXbMRxwUYcF2ykqo5tZf+dOm3jZJIr1z2/IsnjO/RvAQDArtipeP58koNV9bqq+q4kNyS5e4f+LQAA2BU7ctpGdz9bVe9N8t+S7Eny4e5+5AV2uX0n5sF5z3HBRhwXbMRxwUYcF2xkS8fFOXGHQQAAOB+4wyAAAAyJZwAAGFp5PLuNN6dV1Ymq+mJVPXj6MjJV9Yqquq+qvrJ8f/mq58nOqqoPV9VTVfXwurENj4Na86Hl/eOhqnrj6mbOTjrDcfFLVfWXy3vGg1V1zbrX3r8cF1+uqp9YzazZSVV1ZVV9qqoerapHqup9y7j3i4vYCxwX2/Z+sdJ4Xncb77cneX2Sd1bV61c5J1buR7v70Lrrch5Ncn93H0xy//KcC9tHkrztOWNnOg7enuTg8nUkyW27NEd230fy/OMiSW5d3jMOdfe9SbL8d+SGJD+47PPry39vuLA8m+TnuvsHklyd5Oblf3vvFxe3Mx0XyTa9X6x65dltvNnMdUnuXB7fmeT6Fc6FXdDdf5zk688ZPtNxcF2Sj/aazyS5vKr27c5M2U1nOC7O5LokH+vub3f3V5Mcz9p/b7iAdPcT3f2F5fG3kjyaZH+8X1zUXuC4OJMX/X6x6njen+Sxdc9P5oV/QS5sneSPquqB5fbtSfLa7n4iWfs/RJLXrGx2rNKZjgPvIbx3+RP8h9ed1uW4uMhU1YEkb0jy2Xi/YPGc4yLZpveLVcfzprfx5qLypu5+Y9b+tHZzVf3TVU+Ic573kIvbbUm+L8mhJE8k+dVl3HFxEamq703ye0l+prv/+oU23WDMcXGB2uC42Lb3i1XHs9t48/909+PL96eSfDxrfzZ58vSf1ZbvT61uhqzQmY4D7yEXse5+srtPdfffJvmNfOdPrY6Li0RVXZK1QPrN7v79Zdj7xUVuo+NiO98vVh3PbuNNkqSqvqeqXnb6cZIfT/Jw1o6HG5fNbkzyidXMkBU703Fwd5J3L5+ivzrJ06f/XMuF7znnq/5k1t4zkrXj4oaqurSqXpe1D4h9brfnx86qqkpyR5JHu/vX1r3k/eIidqbjYjvfL3bk9txTZ3Ebby5cr03y8bVjPnuT/FZ3/2FVfT7JXVV1U5KvJXnHCufILqiq307y5iSvqqqTSX4xyS3Z+Di4N8k1WfuAxzNJ3rPrE2ZXnOG4eHNVHcran1hPJPnpJOnuR6rqriRfyton72/u7lOrmDc76k1J3pXki1X14DL2C/F+cbE703Hxzu16v3B7bgAAGFr1aRsAAHDeEM8AADAkngEAYEg8AwDAkHgGAIAh8QwAAEPiGQAAhv4vUPXctl20AswAAAAASUVORK5CYII=\n",
      "text/plain": [
       "<Figure size 864x864 with 1 Axes>"
      ]
     },
     "metadata": {
      "needs_background": "light"
     },
     "output_type": "display_data"
    },
    {
     "data": {
      "image/png": "iVBORw0KGgoAAAANSUhEUgAAAs8AAAKvCAYAAACVhiLtAAAABHNCSVQICAgIfAhkiAAAAAlwSFlzAAALEgAACxIB0t1+/AAAADh0RVh0U29mdHdhcmUAbWF0cGxvdGxpYiB2ZXJzaW9uMy4xLjMsIGh0dHA6Ly9tYXRwbG90bGliLm9yZy+AADFEAAAeEElEQVR4nO3dbaxlZ3nf4f9djwMhoTbvcmxLg5JpG5Iqhk4dS0gVgTQxTFQTKVRGFVjI7aSSUYkStRn4kkQq0kRqcIrUIDkxxVRJiJUEYcU0CTWgKB94GYhjbJyIKUzxxBZuCjhEVqg8ufvhrCkn9h6f23Ne9rxcl3S093722vs8IxbbPz1n7bWquwMAAGzt7617AgAAcL4QzwAAMCSeAQBgSDwDAMCQeAYAgCHxDAAAQ+N4rqpLqupPqur3lscvrapPVtUXquq3qurblvFnLY+PL8/v352pAwDA3nomK89vS/Lgpse/mOTW7j6Q5GtJbl7Gb07yte7+niS3LtsBAMB5bxTPVXVVkkNJfm15XEleneS3l03uSPL65f4Ny+Msz79m2R4AAM5r+4bb/XKS/5DkucvjFyT5enc/sTw+meTK5f6VSR5Kku5+oqoeW7b/y81vWFWHkxxOkrr02f/k0hdc9ZRf+o+vvGz8DwEAgK185jOf+cvuftHZvn7LeK6qH0vyaHd/pqpedXp4xaY9eO5bA923JbktSZ51xYG+4qZffsqLjh09tNX0AABgrKr+13ZeP1l5fmWSf1FVr0vy7CR/Pxsr0ZdX1b5l9fmqJA8v259McnWSk1W1L8llSb66nUkCAMC5YMtjnrv77d19VXfvT3Jjko92979K8rEkP7FsdlOSDy3371oeZ3n+o939lJVnAAA432znPM8/m+Snq+p4No5pvn0Zvz3JC5bxn05yZHtTBACAc8P0C4NJku7+eJKPL/e/mOTaFdv8TZI37MDcAADgnOIKgwAAMCSeAQBgSDwDAMCQeAYAgCHxDAAAQ+IZAACGxDMAAAyJZwAAGBLPAAAwJJ4BAGBIPAMAwJB4BgCAIfEMAABD4hkAAIbEMwAADIlnAAAYEs8AADAkngEAYEg8AwDAkHgGAIAh8QwAAEPiGQAAhsQzAAAMiWcAABgSzwAAMCSeAQBgSDwDAMCQeAYAgCHxDAAAQ+IZAACGxDMAAAyJZwAAGBLPAAAwJJ4BAGBIPAMAwJB4BgCAIfEMAABD4hkAAIbEMwAADIlnAAAYEs8AADAkngEAYEg8AwDAkHgGAIAh8QwAAEPiGQAAhsQzAAAMiWcAABgSzwAAMCSeAQBgSDwDAMCQeAYAgCHxDAAAQ+IZAACGxDMAAAyJZwAAGBLPAAAwJJ4BAGBIPAMAwJB4BgCAIfEMAABD4hkAAIbEMwAADIlnAAAYEs8AADAkngEAYEg8AwDAkHgGAIAh8QwAAEPiGQAAhsQzAAAMiWcAABgSzwAAMLRlPFfVs6vqU1X1p1X1QFX9wjL+vqr6UlXdu/xcs4xXVb27qo5X1X1V9Yrd/kcAAMBe2DfY5ptJXt3df11Vlyb546r678tz/767f/tJ2782yYHl5weTvGe5BQCA89qWK8+94a+Xh5cuP/00L7khyfuX130iyeVVdcX2pwoAAOs1Oua5qi6pqnuTPJrkI939yeWpdy6HZtxaVc9axq5M8tCml59cxp78noer6lhVHTv1+GPb+CcAAMDeGMVzd5/q7muSXJXk2qr6/iRvT/KPkvzTJM9P8rPL5rXqLVa8523dfbC7D17ynMvOavIAALCXntHZNrr760k+nuT67n5kOTTjm0n+a5Jrl81OJrl608uuSvLwDswVAADWanK2jRdV1eXL/W9P8sNJ/uz0ccxVVUlen+T+5SV3JXnzctaN65I81t2P7MrsAQBgD03OtnFFkjuq6pJsxPad3f17VfXRqnpRNg7TuDfJv122/3CS1yU5nuTxJG/Z+WkDAMDe2zKeu/u+JC9fMf7qM2zfSW7Z/tQAAODc4gqDAAAwJJ4BAGBIPAMAwJB4BgCAIfEMAABD4hkAAIbEMwAADIlnAAAYEs8AADAkngEAYEg8AwDAkHgGAIAh8QwAAEPiGQAAhsQzAAAMiWcAABgSzwAAMCSeAQBgSDwDAMCQeAYAgCHxDAAAQ+IZAACGxDMAAAyJZwAAGBLPAAAwJJ4BAGBIPAMAwJB4BgCAIfEMAABD4hkAAIbEMwAADIlnAAAYEs8AADAkngEAYEg8AwDAkHgGAIAh8QwAAEPiGQAAhsQzAAAMiWcAABgSzwAAMCSeAQBgSDwDAMCQeAYAgCHxDAAAQ+IZAACGxDMAAAyJZwAAGBLPAAAwJJ4BAGBIPAMAwJB4BgCAIfEMAABD4hkAAIbEMwAADIlnAAAYEs8AADAkngEAYEg8AwDAkHgGAIAh8QwAAEPiGQAAhsQzAAAMiWcAABgSzwAAMCSeAQBgSDwDAMCQeAYAgCHxDAAAQ+IZAACGxDMAAAyJZwAAGNoynqvq2VX1qar606p6oKp+YRl/aVV9sqq+UFW/VVXftow/a3l8fHl+/+7+EwAAYG9MVp6/meTV3f0DSa5Jcn1VXZfkF5Pc2t0Hknwtyc3L9jcn+Vp3f0+SW5ftAADgvLdlPPeGv14eXrr8dJJXJ/ntZfyOJK9f7t+wPM7y/GuqqnZsxgAAsCajY56r6pKqujfJo0k+kuR/Jvl6dz+xbHIyyZXL/SuTPJQky/OPJXnBTk4aAADWYRTP3X2qu69JclWSa5N876rNlttVq8z95IGqOlxVx6rq2KnHH5vOFwAA1uYZnW2ju7+e5ONJrktyeVXtW566KsnDy/2TSa5OkuX5y5J8dcV73dbdB7v74CXPuezsZg8AAHtocraNF1XV5cv9b0/yw0keTPKxJD+xbHZTkg8t9+9aHmd5/qPd/ZSVZwAAON/s23qTXJHkjqq6JBuxfWd3/15VfT7JB6rqPyb5kyS3L9vfnuS/VdXxbKw437gL8wYAgD23ZTx3931JXr5i/IvZOP75yeN/k+QNOzI7AAA4h7jCIAAADIlnAAAYEs8AADAkngEAYEg8AwDAkHgGAIAh8QwAAEPiGQAAhsQzAAAMiWcAABgSzwAAMCSeAQBgSDwDAMCQeAYAgCHxDAAAQ+IZAACGxDMAAAyJZwAAGBLPAAAwJJ4BAGBIPAMAwJB4BgCAIfEMAABD4hkAAIbEMwAADIlnAAAYEs8AADAkngEAYEg8AwDAkHgGAIAh8QwAAEPiGQAAhsQzAAAMiWcAABgSzwAAMCSeAQBgSDwDAMCQeAYAgCHxDAAAQ+IZAACGxDMAAAyJZwAAGBLPAAAwJJ4BAGBIPAMAwJB4BgCAIfEMAABD4hkAAIbEMwAADIlnAAAYEs8AADAkngEAYEg8AwDAkHgGAIAh8QwAAEPiGQAAhsQzAAAMiWcAABgSzwAAMCSeAQBgSDwDAMCQeAYAgCHxDAAAQ+IZAACGxDMAAAztW/cEns7+I3c/ZezE0UNrmAkAAFh5BgCAMfEMAABD4hkAAIbEMwAADIlnAAAYEs8AADAkngEAYGjLeK6qq6vqY1X1YFU9UFVvW8Z/vqr+oqruXX5et+k1b6+q41X151X1o7v5DwAAgL0yuUjKE0l+prs/W1XPTfKZqvrI8tyt3f2fNm9cVS9LcmOS70vyXUn+R1X9g+4+tZMTBwCAvbblynN3P9Ldn13ufyPJg0mufJqX3JDkA939ze7+UpLjSa7dickCAMA6PaNjnqtqf5KXJ/nkMvTWqrqvqt5bVc9bxq5M8tCml53MitiuqsNVdayqjp16/LFnPHEAANhr43iuqu9M8jtJfqq7/yrJe5J8d5JrkjyS5JdOb7ri5f2Uge7buvtgdx+85DmXPeOJAwDAXhvFc1Vdmo1w/vXu/t0k6e6vdPep7v7bJL+abx2acTLJ1ZteflWSh3duygAAsB6Ts21UktuTPNjd79o0fsWmzX48yf3L/buS3FhVz6qqlyY5kORTOzdlAABYj8nZNl6Z5E1JPldV9y5j70jyxqq6JhuHZJxI8pNJ0t0PVNWdST6fjTN13OJMGwAAXAi2jOfu/uOsPo75w0/zmncmeec25gUAAOccVxgEAIAh8QwAAEPiGQAAhsQzAAAMiWcAABgSzwAAMCSeAQBgSDwDAMCQeAYAgCHxDAAAQ+IZAACGxDMAAAyJZwAAGBLPAAAwJJ4BAGBIPAMAwJB4BgCAIfEMAABD4hkAAIbEMwAADIlnAAAYEs8AADAkngEAYEg8AwDAkHgGAIAh8QwAAEPiGQAAhsQzAAAMiWcAABgSzwAAMCSeAQBgSDwDAMCQeAYAgCHxDAAAQ+IZAACGxDMAAAyJZwAAGBLPAAAwtG/dE+Dv2n/k7pXjJ44e2uOZAADwZFaeAQBgSDwDAMCQeAYAgCHxDAAAQ+IZAACGxDMAAAyJZwAAGBLPAAAwJJ4BAGBIPAMAwJB4BgCAIfEMAABD4hkAAIbEMwAADIlnAAAYEs8AADAkngEAYEg8AwDAkHgGAIAh8QwAAEPiGQAAhsQzAAAMiWcAABgSzwAAMCSeAQBgSDwDAMCQeAYAgCHxDAAAQ/vWPYFnav+Ru1eOnzh6aI9nAgDAxcbKMwAADIlnAAAYEs8AADAkngEAYGjLeK6qq6vqY1X1YFU9UFVvW8afX1UfqaovLLfPW8arqt5dVcer6r6qesVu/yMAAGAvTFaen0jyM939vUmuS3JLVb0syZEk93T3gST3LI+T5LVJDiw/h5O8Z8dnDQAAa7BlPHf3I9392eX+N5I8mOTKJDckuWPZ7I4kr1/u35Dk/b3hE0kur6ordnzmAACwx57RMc9VtT/Jy5N8MslLuvuRZCOwk7x42ezKJA9tetnJZQwAAM5r43iuqu9M8jtJfqq7/+rpNl0x1ive73BVHauqY6cef2w6DQAAWJtRPFfVpdkI51/v7t9dhr9y+nCM5fbRZfxkkqs3vfyqJA8/+T27+7buPtjdBy95zmVnO38AANgzk7NtVJLbkzzY3e/a9NRdSW5a7t+U5EObxt+8nHXjuiSPnT68AwAAzmf7Btu8Msmbknyuqu5dxt6R5GiSO6vq5iRfTvKG5bkPJ3ldkuNJHk/ylh2dMQAArMmW8dzdf5zVxzEnyWtWbN9JbtnmvAAA4JzjCoMAADAkngEAYEg8AwDAkHgGAIAh8QwAAEPiGQAAhsQzAAAMiWcAABgSzwAAMCSeAQBgSDwDAMDQvnVPYKfsP3L3yvETRw/t8UwAALhQWXkGAIAh8QwAAEPiGQAAhsQzAAAMiWcAABgSzwAAMCSeAQBgSDwDAMCQeAYAgCHxDAAAQ+IZAACGxDMAAAyJZwAAGBLPAAAwJJ4BAGBIPAMAwJB4BgCAIfEMAABD4hkAAIbEMwAADIlnAAAYEs8AADAkngEAYEg8AwDAkHgGAIChfeuewG7bf+Tup4ydOHpoDTMBAOB8Z+UZAACGxDMAAAyJZwAAGBLPAAAwJJ4BAGBIPAMAwJB4BgCAIfEMAABD4hkAAIbEMwAADIlnAAAYEs8AADC0b90TWIf9R+5eOX7i6KE9ngkAAOcTK88AADAkngEAYOiiPGxjJ6w69MNhHwAAFzYrzwAAMCSeAQBgSDwDAMCQeAYAgCHxDAAAQ+IZAACGxDMAAAyJZwAAGBLPAAAw5AqDW1h1JUEAAC5OVp4BAGBIPAMAwJB4BgCAIfEMAABDvjC4g8705cITRw/t8UwAANgNVp4BAGBIPAMAwJB4BgCAIfEMAABDW35hsKrem+THkjza3d+/jP18kn+T5H8vm72juz+8PPf2JDcnOZXk33X3H+zCvM8rvkgIAHBhmKw8vy/J9SvGb+3ua5af0+H8siQ3Jvm+5TW/UlWX7NRkAQBgnbaM5+7+oyRfHb7fDUk+0N3f7O4vJTme5NptzA8AAM4Z2znm+a1VdV9VvbeqnreMXZnkoU3bnFzGnqKqDlfVsao6durxx7YxDQAA2BtnG8/vSfLdSa5J8kiSX1rGa8W2veoNuvu27j7Y3Qcvec5lZzkNAADYO2cVz939le4+1d1/m+RX861DM04muXrTplcleXh7UwQAgHPDWV2eu6qu6O5Hloc/nuT+5f5dSX6jqt6V5LuSHEjyqW3PkpVn7HC2DgCAvTU5Vd1vJnlVkhdW1ckkP5fkVVV1TTYOyTiR5CeTpLsfqKo7k3w+yRNJbunuU7szdQAA2FtbxnN3v3HF8O1Ps/07k7xzO5MCAIBzkSsMAgDA0Fkd83yhOtOVAAEAILHyDAAAY+IZAACGxDMAAAyJZwAAGBLPAAAwJJ4BAGBIPAMAwJB4BgCAIfEMAABD4hkAAIbEMwAADIlnAAAYEs8AADC0b90TuJjtP3L3uqcAAMAzYOUZAACGxDMAAAyJZwAAGBLPAAAwJJ4BAGBIPAMAwJB4BgCAIfEMAABD4hkAAIbEMwAADIlnAAAYEs8AADC0b90T4OztP3L3yvETRw/t8UwAAC4OVp4BAGDIyvMFaNWKtNVoAIDts/IMAABD4hkAAIbEMwAADIlnAAAYEs8AADAkngEAYEg8AwDAkHgGAIAh8QwAAEPiGQAAhlye+yKx6pLdict2AwA8E1aeAQBgSDwDAMCQeAYAgCHxDAAAQ+IZAACGxDMAAAw5Vd1FzinsAADmrDwDAMCQeAYAgCHxDAAAQ+IZAACGxDMAAAyJZwAAGBLPAAAwJJ4BAGBIPAMAwJB4BgCAIfEMAABD4hkAAIbEMwAADIlnAAAYEs8AADAkngEAYEg8AwDAkHgGAIAh8QwAAEPiGQAAhsQzAAAMiWcAABgSzwAAMLRlPFfVe6vq0aq6f9PY86vqI1X1heX2ect4VdW7q+p4Vd1XVa/YzckDAMBemqw8vy/J9U8aO5Lknu4+kOSe5XGSvDbJgeXncJL37Mw0AQBg/baM5+7+oyRffdLwDUnuWO7fkeT1m8bf3xs+keTyqrpipyYLAADrdLbHPL+kux9JkuX2xcv4lUke2rTdyWUMAADOezv9hcFaMdYrN6w6XFXHqurYqccf2+FpAADAzjvbeP7K6cMxlttHl/GTSa7etN1VSR5e9QbdfVt3H+zug5c857KznAYAAOyds43nu5LctNy/KcmHNo2/eTnrxnVJHjt9eAcAAJzv9m21QVX9ZpJXJXlhVZ1M8nNJjia5s6puTvLlJG9YNv9wktclOZ7k8SRv2YU5swf2H7n7KWMnjh5aw0wAAM4dW8Zzd7/xDE+9ZsW2neSW7U4KAADORa4wCAAAQ+IZAACGxDMAAAyJZwAAGBLPAAAwJJ4BAGBIPAMAwJB4BgCAIfEMAABD4hkAAIbEMwAADIlnAAAYEs8AADAkngEAYEg8AwDAkHgGAIAh8QwAAEPiGQAAhsQzAAAMiWcAABgSzwAAMCSeAQBgSDwDAMCQeAYAgCHxDAAAQ+IZAACGxDMAAAyJZwAAGBLPAAAwJJ4BAGBIPAMAwJB4BgCAIfEMAABD4hkAAIb2rXsCnP/2H7n7KWMnjh7alffdqfcGADgbVp4BAGBIPAMAwJB4BgCAIfEMAABD4hkAAIbEMwAADIlnAAAYEs8AADAkngEAYEg8AwDAkHgGAIAh8QwAAEP71j0Bzh/7j9y97ikAAKyVlWcAABgSzwAAMCSeAQBgSDwDAMCQeAYAgCHxDAAAQ+IZAACGxDMAAAyJZwAAGHKFQfbUma5SeOLooT2eCQDAM2flGQAAhsQzAAAMiWcAABgSzwAAMCSeAQBgSDwDAMCQeAYAgCHneWZXnOl8zgAA5zMrzwAAMCSeAQBgSDwDAMCQeAYAgCHxDAAAQ862wQXhTGf3OHH00B7PBAC4kFl5BgCAoW2tPFfViSTfSHIqyRPdfbCqnp/kt5LsT3Iiyb/s7q9tb5pc6JwXGgA4H+zEyvMPdfc13X1weXwkyT3dfSDJPctjAAA47+3GMc83JHnVcv+OJB9P8rO78Hu4SFmlBgDWZbsrz53kD6vqM1V1eBl7SXc/kiTL7YtXvbCqDlfVsao6durxx7Y5DQAA2H3bXXl+ZXc/XFUvTvKRqvqz6Qu7+7YktyXJs6440NucBwAA7LptrTx398PL7aNJPpjk2iRfqaorkmS5fXS7kwQAgHPBWcdzVX1HVT339P0kP5Lk/iR3Jblp2eymJB/a7iQBAOBcsJ3DNl6S5INVdfp9fqO7f7+qPp3kzqq6OcmXk7xh+9MEAID1O+t47u4vJvmBFeP/J8lrtjMpAAA4F7nCIAAADIlnAAAYEs8AADAkngEAYEg8AwDAkHgGAIAh8QwAAEPiGQAAhsQzAAAMiWcAABgSzwAAMCSeAQBgSDwDAMCQeAYAgCHxDAAAQ+IZAACGxDMAAAyJZwAAGBLPAAAwJJ4BAGBIPAMAwJB4BgCAIfEMAABD4hkAAIbEMwAADIlnAAAYEs8AADAkngEAYEg8AwDA0L51TwB20/4jdz9l7MTRQ2uYCQBwIbDyDAAAQ+IZAACGxDMAAAyJZwAAGBLPAAAwJJ4BAGBIPAMAwJDzPHPRWXXu58T5nwGArVl5BgCAIfEMAABD4hkAAIbEMwAADIlnAAAYEs8AADAkngEAYEg8AwDAkHgGAIAh8QwAAEMuzw07aNWlv132GwAuHFaeAQBgSDwDAMCQwzbgLKw6PAMAuPBZeQYAgCHxDAAAQ+IZAACGHPMMizMdx+xUcwDAaeIZtuDLgQDAaQ7bAACAIfEMAABDDtuAXeZYagC4cFh5BgCAIfEMAABD4hkAAIbEMwAADIlnAAAYEs8AADAkngEAYEg8AwDAkIukwJq4eAoAnH/EM5zHVgW4+AaA3eOwDQAAGLLyDOeYMx3OAQCsn5VnAAAY2rWV56q6Psl/TnJJkl/r7qO79buAb/FFRADYPbsSz1V1SZL/kuSfJzmZ5NNVdVd3f343fh+wN3xBEYCL3W4dtnFtkuPd/cXu/r9JPpDkhl36XQAAsCequ3f+Tat+Isn13f2vl8dvSvKD3f3WTdscTnJ4efj9Se7f8Ylwvnthkr9c9yQ459gvWMV+wSr2C1b5h9393LN98W4d81wrxv5OpXf3bUluS5KqOtbdB3dpLpyn7BesYr9gFfsFq9gvWKWqjm3n9bt12MbJJFdvenxVkod36XcBAMCe2K14/nSSA1X10qr6tiQ3Jrlrl34XAADsiV05bKO7n6iqtyb5g2ycqu693f3A07zktt2YB+c9+wWr2C9YxX7BKvYLVtnWfrErXxgEAIALkSsMAgDAkHgGAIChtcdzVV1fVX9eVcer6si658P6VNWJqvpcVd17+jQyVfX8qvpIVX1huX3euufJ7qqq91bVo1V1/6axlftBbXj38vlxX1W9Yn0zZzedYb/4+ar6i+Uz496qet2m596+7Bd/XlU/up5Zs5uq6uqq+lhVPVhVD1TV25ZxnxcXsafZL3bs82Kt8bzpMt6vTfKyJG+sqpetc06s3Q919zWbzst5JMk93X0gyT3LYy5s70ty/ZPGzrQfvDbJgeXncJL37NEc2Xvvy1P3iyS5dfnMuKa7P5wky39HbkzyfctrfmX57w0XlieS/Ex3f2+S65Lcsvxv7/Pi4nam/SLZoc+Lda88u4w3W7khyR3L/TuSvH6Nc2EPdPcfJfnqk4bPtB/ckOT9veETSS6vqiv2ZqbspTPsF2dyQ5IPdPc3u/tLSY5n4783XEC6+5Hu/uxy/xtJHkxyZXxeXNSeZr84k2f8ebHueL4yyUObHp/M0/8DubB1kj+sqs8sl29Pkpd09yPJxv8hkrx4bbNjnc60H/gM4a3Ln+Dfu+mwLvvFRaaq9id5eZJPxucFiyftF8kOfV6sO563vIw3F5VXdvcrsvGntVuq6p+te0Kc83yGXNzek+S7k1yT5JEkv7SM2y8uIlX1nUl+J8lPdfdfPd2mK8bsFxeoFfvFjn1erDueXcab/6+7H15uH03ywWz82eQrp/+sttw+ur4ZskZn2g98hlzEuvsr3X2qu/82ya/mW39qtV9cJKrq0mwE0q939+8uwz4vLnKr9oud/LxYdzy7jDdJkqr6jqp67un7SX4kyf3Z2B9uWja7KcmH1jND1uxM+8FdSd68fIv+uiSPnf5zLRe+Jx2v+uPZ+MxINvaLG6vqWVX10mx8QexTez0/dldVVZLbkzzY3e/a9JTPi4vYmfaLnfy82JXLc0+dxWW8uXC9JMkHN/b57EvyG939+1X16SR3VtXNSb6c5A1rnCN7oKp+M8mrkrywqk4m+bkkR7N6P/hwktdl4wsejyd5y55PmD1xhv3iVVV1TTb+xHoiyU8mSXc/UFV3Jvl8Nr55f0t3n1rHvNlVr0zypiSfq6p7l7F3xOfFxe5M+8Ubd+rzwuW5AQBgaN2HbQAAwHlDPAMAwJB4BgCAIfEMAABD4hkAAIbEMwAADIlnAAAY+n+UauRfULxbJQAAAABJRU5ErkJggg==\n",
      "text/plain": [
       "<Figure size 864x864 with 1 Axes>"
      ]
     },
     "metadata": {
      "needs_background": "light"
     },
     "output_type": "display_data"
    },
    {
     "data": {
      "image/png": "iVBORw0KGgoAAAANSUhEUgAAAs8AAAKvCAYAAACVhiLtAAAABHNCSVQICAgIfAhkiAAAAAlwSFlzAAALEgAACxIB0t1+/AAAADh0RVh0U29mdHdhcmUAbWF0cGxvdGxpYiB2ZXJzaW9uMy4xLjMsIGh0dHA6Ly9tYXRwbG90bGliLm9yZy+AADFEAAAeDElEQVR4nO3dbaxlZ3nf4f9dj2NCQm3eNbUtDUqmbUiqGOo6lpAqAmkCdlUTKVRGFVjI1aSSkYgStRnyJYlUpInUxBFSg+TUFFMlASsJwoppGmpAUT7wMiaOsXEQU5jiiS2sFHCIrFB5cvfDWVNOPHt8bs952fNyXdLR2fvZa+3zHHl5z0/PWXvt6u4AAABb+3vrngAAAJwvxDMAAAyJZwAAGBLPAAAwJJ4BAGBIPAMAwNA4nqvqkqr606r6g+X+K6rq01X1par6UFV91zJ+2XL/2PL4gd2ZOgAA7K3nsvL8ziSPbLr/K0lu7+6DSb6R5NZl/NYk3+ju709y+7IdAACc90bxXFVXJbkxyX9Z7leS1yX53WWTu5K8abl903I/y+OvX7YHAIDz2r7hdr+e5D8kecFy/8VJvtndTy/3TyS5crl9ZZJHk6S7n66qJ5ft/3LzE1bVoSSHkqQufd4/vfTFV532Q//JlZePfxEAANjK/fff/5fd/dKz3X/LeK6qf5nkie6+v6pee2p4xaY9eOw7A913JLkjSS7bf7D33/Lrp+109MiNW00PAADGqup/b2f/ycrza5L8q6q6Icnzkvz9bKxEX1FV+5bV56uSPLZsfyLJ1UlOVNW+JJcn+fp2JgkAAOeCLc957u53dfdV3X0gyc1JPt7d/ybJJ5L81LLZLUk+sty+Z7mf5fGPd/dpK88AAHC+2c51nn8+yc9W1bFsnNN85zJ+Z5IXL+M/m+Tw9qYIAADnhukbBpMk3f3JJJ9cbn85yXUrtvmbJG/egbkBAMA5xScMAgDAkHgGAIAh8QwAAEPiGQAAhsQzAAAMiWcAABgSzwAAMCSeAQBgSDwDAMCQeAYAgCHxDAAAQ+IZAACGxDMAAAyJZwAAGBLPAAAwJJ4BAGBIPAMAwJB4BgCAIfEMAABD4hkAAIbEMwAADIlnAAAYEs8AADAkngEAYEg8AwDAkHgGAIAh8QwAAEPiGQAAhsQzAAAMiWcAABgSzwAAMCSeAQBgSDwDAMCQeAYAgCHxDAAAQ+IZAACGxDMAAAyJZwAAGBLPAAAwJJ4BAGBIPAMAwJB4BgCAIfEMAABD4hkAAIbEMwAADIlnAAAYEs8AADAkngEAYEg8AwDAkHgGAIAh8QwAAEPiGQAAhsQzAAAMiWcAABgSzwAAMCSeAQBgSDwDAMCQeAYAgCHxDAAAQ+IZAACGxDMAAAyJZwAAGBLPAAAwJJ4BAGBIPAMAwJB4BgCAIfEMAABD4hkAAIbEMwAADIlnAAAYEs8AADAkngEAYEg8AwDA0JbxXFXPq6rPVNWfVdXDVfXLy/j7q+orVfXA8nXNMl5V9Z6qOlZVD1bVq3f7lwAAgL2wb7DNt5O8rrv/uqouTfInVfXfl8f+fXf/7jO2f2OSg8vXjyR57/IdAADOa1uuPPeGv17uXrp89bPsclOSDyz7fSrJFVW1f/tTBQCA9Rqd81xVl1TVA0meSPKx7v708tC7l1Mzbq+qy5axK5M8umn3E8vYM5/zUFUdraqjJ596chu/AgAA7I1RPHf3ye6+JslVSa6rqh9K8q4k/zjJP0vyoiQ/v2xeq55ixXPe0d3Xdve1lzz/8rOaPAAA7KXndLWN7v5mkk8meUN3P76cmvHtJP81yXXLZieSXL1pt6uSPLYDcwUAgLWaXG3jpVV1xXL7u5P8WJI/P3Uec1VVkjcleWjZ5Z4kb1uuunF9kie7+/FdmT0AAOyhydU29ie5q6ouyUZs393df1BVH6+ql2bjNI0Hkvy7ZfuPJrkhybEkTyV5+85PGwAA9t6W8dzdDyZ51Yrx151h+05y2/anBgAA5xafMAgAAEPiGQAAhsQzAAAMiWcAABgSzwAAMCSeAQBgSDwDAMCQeAYAgCHxDAAAQ+IZAACGxDMAAAyJZwAAGBLPAAAwJJ4BAGBIPAMAwJB4BgCAIfEMAABD4hkAAIbEMwAADIlnAAAYEs8AADAkngEAYEg8AwDAkHgGAIAh8QwAAEPiGQAAhsQzAAAMiWcAABgSzwAAMCSeAQBgSDwDAMCQeAYAgCHxDAAAQ+IZAACGxDMAAAyJZwAAGBLPAAAwJJ4BAGBIPAMAwJB4BgCAIfEMAABD4hkAAIbEMwAADIlnAAAYEs8AADAkngEAYEg8AwDAkHgGAIAh8QwAAEPiGQAAhsQzAAAMiWcAABgSzwAAMCSeAQBgSDwDAMCQeAYAgCHxDAAAQ+IZAACGxDMAAAyJZwAAGBLPAAAwJJ4BAGBIPAMAwJB4BgCAIfEMAABD4hkAAIbEMwAADIlnAAAYEs8AADAkngEAYEg8AwDAkHgGAIChLeO5qp5XVZ+pqj+rqoer6peX8VdU1aer6ktV9aGq+q5l/LLl/rHl8QO7+ysAAMDemKw8fzvJ67r7h5Nck+QNVXV9kl9Jcnt3H0zyjSS3LtvfmuQb3f39SW5ftgMAgPPelvHcG/56uXvp8tVJXpfkd5fxu5K8abl903I/y+Ovr6rasRkDAMCajM55rqpLquqBJE8k+ViS/5Xkm9399LLJiSRXLrevTPJokiyPP5nkxTs5aQAAWIdRPHf3ye6+JslVSa5L8gOrNlu+r1pl7mcOVNWhqjpaVUdPPvXkdL4AALA2z+lqG939zSSfTHJ9kiuqat/y0FVJHltun0hydZIsj1+e5OsrnuuO7r62u6+95PmXn93sAQBgD02utvHSqrpiuf3dSX4sySNJPpHkp5bNbknykeX2Pcv9LI9/vLtPW3kGAIDzzb6tN8n+JHdV1SXZiO27u/sPquoLST5YVf8xyZ8muXPZ/s4k/62qjmVjxfnmXZg3AADsuS3jubsfTPKqFeNfzsb5z88c/5skb96R2QEAwDnEJwwCAMCQeAYAgCHxDAAAQ+IZAACGxDMAAAyJZwAAGBLPAAAwJJ4BAGBIPAMAwJB4BgCAIfEMAABD4hkAAIbEMwAADIlnAAAYEs8AADAkngEAYEg8AwDAkHgGAIAh8QwAAEPiGQAAhsQzAAAMiWcAABgSzwAAMCSeAQBgSDwDAMCQeAYAgCHxDAAAQ+IZAACGxDMAAAyJZwAAGBLPAAAwJJ4BAGBIPAMAwJB4BgCAIfEMAABD4hkAAIbEMwAADIlnAAAYEs8AADAkngEAYEg8AwDAkHgGAIAh8QwAAEPiGQAAhsQzAAAM7Vv3BJ7NgcP3njZ2/MiNa5gJAABYeQYAgDHxDAAAQ+IZAACGxDMAAAyJZwAAGBLPAAAwJJ4BAGBIPAMAwJB4BgCAIfEMAABD4hkAAIbEMwAADIlnAAAYEs8AADAkngEAYEg8AwDAkHgGAIAh8QwAAEPiGQAAhsQzAAAMiWcAABgSzwAAMCSeAQBgSDwDAMCQeAYAgCHxDAAAQ+IZAACGtoznqrq6qj5RVY9U1cNV9c5l/Jeq6i+q6oHl64ZN+7yrqo5V1Rer6id28xcAAIC9sm+wzdNJfq67P1dVL0hyf1V9bHns9u7+T5s3rqpXJrk5yQ8m+QdJ/mdV/cPuPrmTEwcAgL225cpzdz/e3Z9bbn8rySNJrnyWXW5K8sHu/nZ3fyXJsSTX7cRkAQBgnZ7TOc9VdSDJq5J8ehl6R1U9WFXvq6oXLmNXJnl0024nsiK2q+pQVR2tqqMnn3ryOU8cAAD22jieq+p7k/xekp/p7r9K8t4k35fkmiSPJ/nVU5uu2L1PG+i+o7uv7e5rL3n+5c954gAAsNdG8VxVl2YjnH+ru38/Sbr7a919srv/Nslv5junZpxIcvWm3a9K8tjOTRkAANZjcrWNSnJnkke6+9c2je/ftNlPJnlouX1Pkpur6rKqekWSg0k+s3NTBgCA9ZhcbeM1Sd6a5PNV9cAy9gtJ3lJV12TjlIzjSX46Sbr74aq6O8kXsnGljttcaQMAgAvBlvHc3X+S1ecxf/RZ9nl3kndvY14AAHDO8QmDAAAwJJ4BAGBIPAMAwJB4BgCAIfEMAABD4hkAAIbEMwAADIlnAAAYEs8AADAkngEAYEg8AwDAkHgGAIAh8QwAAEPiGQAAhsQzAAAMiWcAABgSzwAAMCSeAQBgSDwDAMCQeAYAgCHxDAAAQ+IZAACGxDMAAAyJZwAAGBLPAAAwJJ4BAGBIPAMAwJB4BgCAIfEMAABD4hkAAIbEMwAADIlnAAAYEs8AADAkngEAYEg8AwDAkHgGAIAh8QwAAEPiGQAAhsQzAAAMiWcAABgSzwAAMCSeAQBgSDwDAMCQeAYAgCHxDAAAQ+IZAACGxDMAAAyJZwAAGBLPAAAwJJ4BAGBIPAMAwJB4BgCAIfEMAABD+9Y9Af6uA4fvXTl+/MiNezwTAACeycozAAAMiWcAABgSzwAAMCSeAQBgSDwDAMDQeXe1DVejAABgXaw8AwDAkHgGAIAh8QwAAEPiGQAAhsQzAAAMiWcAABgSzwAAMCSeAQBgSDwDAMCQeAYAgCHxDAAAQ+IZAACGtoznqrq6qj5RVY9U1cNV9c5l/EVV9bGq+tLy/YXLeFXVe6rqWFU9WFWv3u1fAgAA9sJk5fnpJD/X3T+Q5Pokt1XVK5McTnJfdx9Mct9yP0nemOTg8nUoyXt3fNYAALAGW8Zzdz/e3Z9bbn8rySNJrkxyU5K7ls3uSvKm5fZNST7QGz6V5Iqq2r/jMwcAgD32nM55rqoDSV6V5NNJXt7djycbgZ3kZctmVyZ5dNNuJ5YxAAA4r43juaq+N8nvJfmZ7v6rZ9t0xViveL5DVXW0qo6efOrJ6TQAAGBtRvFcVZdmI5x/q7t/fxn+2qnTMZbvTyzjJ5JcvWn3q5I89szn7O47uvva7r72kudffrbzBwCAPTO52kYluTPJI939a5seuifJLcvtW5J8ZNP425arblyf5MlTp3cAAMD5bN9gm9ckeWuSz1fVA8vYLyQ5kuTuqro1yVeTvHl57KNJbkhyLMlTSd6+ozMGAIA12TKeu/tPsvo85iR5/YrtO8lt25wXAACcc3zCIAAADIlnAAAYEs8AADAkngEAYEg8AwDAkHgGAIAh8QwAAEPiGQAAhsQzAAAMiWcAABgSzwAAMCSeAQBgSDwDAMCQeAYAgCHxDAAAQ+IZAACGxDMAAAyJZwAAGBLPAAAwJJ4BAGBIPAMAwJB4BgCAIfEMAABD4hkAAIbEMwAADIlnAAAYEs8AADAkngEAYEg8AwDAkHgGAIAh8QwAAEPiGQAAhvatewI75cDhe1eOHz9y4x7PBACAC5WVZwAAGLpgVp53ixVtAABOsfIMAABD4hkAAIbEMwAADIlnAAAYEs8AADAkngEAYEg8AwDAkHgGAIAh8QwAAEPiGQAAhsQzAAAMiWcAABgSzwAAMCSeAQBgSDwDAMCQeAYAgCHxDAAAQ+IZAACG9q17ArvtwOF7Txs7fuTGNcwEAIDznZVnAAAYuuBXns9lq1bFAQA4d1l5BgCAIfEMAABD4hkAAIbEMwAADIlnAAAYEs8AADAkngEAYEg8AwDAkHgGAIAh8QwAAEPiGQAAhsQzAAAMiWcAABgSzwAAMCSeAQBgSDwDAMCQeAYAgKEt47mq3ldVT1TVQ5vGfqmq/qKqHli+btj02Luq6lhVfbGqfmK3Jg4AAHttsvL8/iRvWDF+e3dfs3x9NEmq6pVJbk7yg8s+v1FVl+zUZAEAYJ22jOfu/uMkXx8+301JPtjd3+7uryQ5luS6bcwPAADOGds55/kdVfXgclrHC5exK5M8ummbE8vYaarqUFUdraqjJ596chvTAACAvXG28fzeJN+X5Jokjyf51WW8Vmzbq56gu+/o7mu7+9pLnn/5WU4DAAD2zlnFc3d/rbtPdvffJvnNfOfUjBNJrt606VVJHtveFAEA4NxwVvFcVfs33f3JJKeuxHFPkpur6rKqekWSg0k+s70pAgDAuWHfVhtU1e8keW2Sl1TViSS/mOS1VXVNNk7JOJ7kp5Okux+uqruTfCHJ00lu6+6TuzN1AADYW1vGc3e/ZcXwnc+y/buTvHs7kwIAgHORTxgEAIChLVeeLyYHDt+77ikAAHAOs/IMAABD4hkAAIbEMwAADIlnAAAYEs8AADDkaht7wFU8AAAuDFaeAQBgSDwDAMCQeAYAgCHxDAAAQ+IZAACGxDMAAAyJZwAAGLoor/O8E9ddXvUcx4/cuO3nBQDg3GXlGQAAhsQzAAAMiWcAABgSzwAAMCSeAQBgSDwDAMCQeAYAgCHxDAAAQ+IZAACGxDMAAAyJZwAAGBLPAAAwJJ4BAGBIPAMAwNC+dU/gQnLg8L3rngIAALvIyjMAAAyJZwAAGBLPAAAwJJ4BAGBIPAMAwJB4BgCAIfEMAABD4hkAAIbEMwAADIlnAAAYEs8AADAkngEAYEg8AwDAkHgGAIAh8QwAAEPiGQAAhsQzAAAMiWcAABgSzwAAMLRv3RNg5sDhe08bO37kxjXMBADg4iWez2OrgjoR1QAAu8VpGwAAMGTl+QLkFA8AgN1h5RkAAIbEMwAADIlnAAAYEs8AADAkngEAYEg8AwDAkHgGAIAh8QwAAEPiGQAAhsQzAAAMiWcAABgSzwAAMCSeAQBgSDwDAMCQeAYAgCHxDAAAQ+IZAACGxDMAAAxtGc9V9b6qeqKqHto09qKq+lhVfWn5/sJlvKrqPVV1rKoerKpX7+bkAQBgL01Wnt+f5A3PGDuc5L7uPpjkvuV+krwxycHl61CS9+7MNAEAYP22jOfu/uMkX3/G8E1J7lpu35XkTZvGP9AbPpXkiqrav1OTBQCAdTrbc55f3t2PJ8ny/WXL+JVJHt203YllDAAAzns7/YbBWjHWKzesOlRVR6vq6MmnntzhaQAAwM7bd5b7fa2q9nf348tpGU8s4yeSXL1pu6uSPLbqCbr7jiR3JMll+w+uDGzODwcO33va2PEjN65hJgAAu+tsV57vSXLLcvuWJB/ZNP625aob1yd58tTpHQAAcL7bcuW5qn4nyWuTvKSqTiT5xSRHktxdVbcm+WqSNy+bfzTJDUmOJXkqydt3Yc4AALAWW8Zzd7/lDA+9fsW2neS27U4KAADORWd7zjMXiFXnKyfOWQYAWMXHcwMAwJB4BgCAIfEMAABD4hkAAIbEMwAADIlnAAAYEs8AADAkngEAYEg8AwDAkHgGAIAh8QwAAEPiGQAAhsQzAAAMiWcAABgSzwAAMCSeAQBgSDwDAMDQvnVPgHPTgcP3njZ2/MiNa5gJAMC5w8ozAAAMiWcAABgSzwAAMOScZ85Zq867Tpx7DQCsj5VnAAAYsvJ8kTjTKi4AAHNWngEAYEg8AwDAkNM22FPeBAgAnM+sPAMAwJB4BgCAIfEMAABD4hkAAIbEMwAADIlnAAAYEs8AADDkOs/sCh8HDgBciKw8AwDAkJVnxqwmAwAXOyvPAAAwJJ4BAGBIPAMAwJB4BgCAIfEMAABD4hkAAIbEMwAADIlnAAAYEs8AADAkngEAYEg8AwDA0L51TwCS5MDhe9c9BQCALVl5BgCAIfEMAABD4hkAAIbEMwAADIlnAAAYEs8AADAkngEAYEg8AwDAkHgGAIAh8QwAAEPiGQAAhsQzAAAMiWcAABgSzwAAMCSeAQBgSDwDAMCQeAYAgCHxDAAAQ+IZAACGxDMAAAyJZwAAGBLPAAAwJJ4BAGBo33Z2rqrjSb6V5GSSp7v72qp6UZIPJTmQ5HiSf93d39jeNOE7Dhy+97Sx40duXMNMAICLzU6sPP9od1/T3dcu9w8nua+7Dya5b7kPAADnvd04beOmJHctt+9K8qZd+BkAALDnthvPneSPqur+qjq0jL28ux9PkuX7y1btWFWHqupoVR09+dST25wGAADsvm2d85zkNd39WFW9LMnHqurPpzt29x1J7kiSy/Yf7G3OAwAAdt22Vp67+7Hl+xNJPpzkuiRfq6r9SbJ8f2K7kwQAgHPBWcdzVX1PVb3g1O0kP57koST3JLll2eyWJB/Z7iQBAOBcsJ3TNl6e5MNVdep5fru7/7CqPpvk7qq6NclXk7x5+9MEAID1O+t47u4vJ/nhFeP/J8nrtzMpAAA4F/mEQQAAGBLPAAAwJJ4BAGBIPAMAwJB4BgCAIfEMAABD4hkAAIbEMwAADIlnAAAYEs8AADAkngEAYGjfuicAO+HA4XtXjh8/cuMezwQAuJBZeQYAgCHxDAAAQ+IZAACGxDMAAAyJZwAAGBLPAAAwJJ4BAGBIPAMAwJAPSeGCturDU3xwCgBwtqw8AwDAkHgGAIAh8QwAAEPiGQAAhrxhEBar3lyYeIMhAPAdVp4BAGBIPAMAwJB4BgCAIec8c9E507nNAABbsfIMAABD4hkAAIbEMwAADIlnAAAYEs8AADAkngEAYEg8AwDAkHgGAIAh8QwAAEPiGQAAhsQzAAAMiWcAABjat+4JwLnuwOF7Txs7fuTGNcwEAFg38QxnYVVQJ6IaAC50TtsAAIAh8QwAAENO24Bd5hQPALhwWHkGAIAh8QwAAEPiGQAAhsQzAAAMecMg7KAzvTlwu8/hzYUAcG6w8gwAAEPiGQAAhsQzAAAMiWcAABgSzwAAMCSeAQBgSDwDAMCQeAYAgCHxDAAAQ9Xd655DLtt/sPff8uvrngacd3zyIAA8N1V1f3dfe7b7W3kGAIAh8QwAAEPiGQAAhsQzAAAMiWcAABgSzwAAMCSeAQBgaN+6JwCcvQOH7z1tzLWfAWD3WHkGAIAhK8/AmJVuAC52Vp4BAGBo1+K5qt5QVV+sqmNVdXi3fg4AAOyVXTlto6ouSfKfk/yLJCeSfLaq7unuL+zGzwO2tuqUCwDgudmtlefrkhzr7i939/9N8sEkN+3SzwIAgD1R3b3zT1r1U0ne0N3/drn/1iQ/0t3v2LTNoSSHlrs/lOShHZ8I57uXJPnLdU+Cc47jglUcF6ziuGCVf9TdLzjbnXfrahu1YuzvVHp335HkjiSpqqPdfe0uzYXzlOOCVRwXrOK4YBXHBatU1dHt7L9bp22cSHL1pvtXJXlsl34WAADsid2K588mOVhVr6iq70pyc5J7dulnAQDAntiV0za6++mqekeS/5HkkiTv6+6Hn2WXO3ZjHpz3HBes4rhgFccFqzguWGVbx8WuvGEQAAAuRD5hEAAAhsQzAAAMrT2efYw3p1TV8ar6fFU9cOoyMlX1oqr6WFV9afn+wnXPk91VVe+rqieq6qFNYyuPg9rwnuX148GqevX6Zs5uOsNx8UtV9RfLa8YDVXXDpsfetRwXX6yqn1jPrNlNVXV1VX2iqh6pqoer6p3LuNeLi9izHBc79nqx1nje9DHeb0zyyiRvqapXrnNOrN2Pdvc1m67LeTjJfd19MMl9y30ubO9P8oZnjJ3pOHhjkoPL16Ek792jObL33p/Tj4skuX15zbimuz+aJMu/Izcn+cFln99Y/r3hwvJ0kp/r7h9Icn2S25b/9l4vLm5nOi6SHXq9WPfKs4/xZis3JblruX1XkjetcS7sge7+4yRff8bwmY6Dm5J8oDd8KskVVbV/b2bKXjrDcXEmNyX5YHd/u7u/kuRYNv694QLS3Y939+eW299K8kiSK+P14qL2LMfFmTzn14t1x/OVSR7ddP9Env0X5MLWSf6oqu5fPr49SV7e3Y8nG/9DJHnZ2mbHOp3pOPAawjuWP8G/b9NpXY6Li0xVHUjyqiSfjtcLFs84LpIder1Ydzxv+THeXFRe092vzsaf1m6rqn++7glxzvMacnF7b5LvS3JNkseT/Ooy7ri4iFTV9yb5vSQ/091/9WybrhhzXFygVhwXO/Z6se549jHe/H/d/djy/YkkH87Gn02+durPasv3J9Y3Q9boTMeB15CLWHd/rbtPdvffJvnNfOdPrY6Li0RVXZqNQPqt7v79ZdjrxUVu1XGxk68X645nH+NNkqSqvqeqXnDqdpIfT/JQNo6HW5bNbknykfXMkDU703FwT5K3Le+ivz7Jk6f+XMuF7xnnq/5kNl4zko3j4uaquqyqXpGNN4h9Zq/nx+6qqkpyZ5JHuvvXNj3k9eIidqbjYidfL3bl47mnzuJjvLlwvTzJhzeO+exL8tvd/YdV9dkkd1fVrUm+muTNa5wje6CqfifJa5O8pKpOJPnFJEey+jj4aJIbsvEGj6eSvH3PJ8yeOMNx8dqquiYbf2I9nuSnk6S7H66qu5N8IRvvvL+tu0+uY97sqtckeWuSz1fVA8vYL8TrxcXuTMfFW3bq9cLHcwMAwNC6T9sAAIDzhngGAIAh8QwAAEPiGQAAhsQzAAAMiWcAABgSzwAAMPT/ALUm18czbNHpAAAAAElFTkSuQmCC\n",
      "text/plain": [
       "<Figure size 864x864 with 1 Axes>"
      ]
     },
     "metadata": {
      "needs_background": "light"
     },
     "output_type": "display_data"
    },
    {
     "data": {
      "image/png": "iVBORw0KGgoAAAANSUhEUgAAAs8AAAKvCAYAAACVhiLtAAAABHNCSVQICAgIfAhkiAAAAAlwSFlzAAALEgAACxIB0t1+/AAAADh0RVh0U29mdHdhcmUAbWF0cGxvdGxpYiB2ZXJzaW9uMy4xLjMsIGh0dHA6Ly9tYXRwbG90bGliLm9yZy+AADFEAAAeFklEQVR4nO3df6jld53f8de7MzGuq5v4I4bpTGDEnbbqlh3tNBsIlKxu15gpnQimRIoGSRkLEZSV1tF/dKHCLFSzCN3A2KTG4qrBHyQ46XbTqIhQoxM3GxOz4lSnZsyQwRqjEjYl46d/3O/UuzPn5r4z98eZO/N4wOWc8znfc+5n8OvJk8/9nu+3xhgBAACW9/fmPQEAANgoxDMAADSJZwAAaBLPAADQJJ4BAKBJPAMAQFM7nqtqU1X9VVV9aXr8iqq6r6q+X1WfrarnTeMXTo8PT89vX5upAwDA+nouK8/vTvLIosd/kuTmMcaOJE8kuXEavzHJE2OM305y87QdAABseK14rqptSXYn+c/T40ry+iSfmza5Pcm10/090+NMz79h2h4AADa0zc3t/jTJv0/younxS5P8bIzxzPT4aJKt0/2tSR5NkjHGM1X15LT9Txa/YVXtTbI3SeqC5/+TC1667bRf+o+3XtT+hwAAwHLuv//+n4wxLjnT1y8bz1X1L5IcH2PcX1VXnRyeseloPPfrgTEOJDmQJBdu2TG23PCnp73o0P7dy00PAADaqup/r+T1nZXnK5P8y6q6Jsnzk/xWFlaiL66qzdPq87Ykj03bH01yWZKjVbU5yUVJfrqSSQIAwNlg2WOexxjvH2NsG2NsT3J9ki+PMf51kq8kecu02Q1J7pzu3zU9zvT8l8cYp608AwDARrOS8zy/L8kfVdXhLBzTfOs0fmuSl07jf5Rk38qmCAAAZ4fuFwaTJGOMryb56nT/B0kun7HN3ya5bhXmBgAAZxVXGAQAgCbxDAAATeIZAACaxDMAADSJZwAAaBLPAADQJJ4BAKBJPAMAQJN4BgCAJvEMAABN4hkAAJrEMwAANIlnAABoEs8AANAkngEAoEk8AwBAk3gGAIAm8QwAAE3iGQAAmsQzAAA0iWcAAGgSzwAA0CSeAQCgSTwDAECTeAYAgCbxDAAATeIZAACaxDMAADSJZwAAaBLPAADQJJ4BAKBJPAMAQJN4BgCAJvEMAABN4hkAAJrEMwAANIlnAABoEs8AANAkngEAoEk8AwBAk3gGAIAm8QwAAE3iGQAAmsQzAAA0iWcAAGgSzwAA0CSeAQCgSTwDAECTeAYAgCbxDAAATeIZAACaxDMAADSJZwAAaBLPAADQJJ4BAKBJPAMAQJN4BgCAJvEMAABN4hkAAJrEMwAANIlnAABoEs8AANAkngEAoEk8AwBAk3gGAIAm8QwAAE3iGQAAmsQzAAA0iWcAAGgSzwAA0CSeAQCgSTwDAECTeAYAgKZl47mqnl9V36yqv66qh6vqj6fxT1TVD6vqgeln5zReVfWxqjpcVQ9W1evW+h8BAADrYXNjm6eTvH6M8cuquiDJ16vqv03P/bsxxudO2f5NSXZMP7+X5JbpFgAANrRlV57Hgl9ODy+YfsazvGRPkk9Or/tGkourasvKpwoAAPPVOua5qjZV1QNJjie5Z4xx3/TUh6dDM26uqgunsa1JHl308qPT2KnvubeqDlXVoRNPPbmCfwIAAKyPVjyPMU6MMXYm2Zbk8qr6nSTvT/KPkvzTJC9J8r5p85r1FjPe88AYY9cYY9emF1x0RpMHAID19JzOtjHG+FmSrya5eoxxbDo04+kk/yXJ5dNmR5Nctuhl25I8tgpzBQCAueqcbeOSqrp4uv8bSf4gyd+cPI65qirJtUkeml5yV5K3T2fduCLJk2OMY2syewAAWEeds21sSXJ7VW3KQmzfMcb4UlV9uaouycJhGg8k+bfT9ncnuSbJ4SRPJXnH6k8bAADW37LxPMZ4MMlrZ4y/fontR5KbVj41AAA4u7jCIAAANIlnAABoEs8AANAkngEAoEk8AwBAk3gGAIAm8QwAAE3iGQAAmsQzAAA0iWcAAGgSzwAA0CSeAQCgSTwDAECTeAYAgCbxDAAATeIZAACaxDMAADSJZwAAaBLPAADQJJ4BAKBJPAMAQJN4BgCAJvEMAABN4hkAAJrEMwAANIlnAABoEs8AANAkngEAoEk8AwBAk3gGAIAm8QwAAE3iGQAAmsQzAAA0iWcAAGgSzwAA0CSeAQCgSTwDAECTeAYAgCbxDAAATeIZAACaxDMAADSJZwAAaBLPAADQJJ4BAKBJPAMAQJN4BgCAJvEMAABN4hkAAJrEMwAANIlnAABoEs8AANAkngEAoEk8AwBAk3gGAIAm8QwAAE3iGQAAmsQzAAA0iWcAAGgSzwAA0CSeAQCgSTwDAEDT5nlP4Nls33fwtLEj+3fPYSYAAGDlGQAA2sQzAAA0iWcAAGgSzwAA0CSeAQCgSTwDAECTeAYAgCbxDAAATeIZAACaxDMAADQtG89V9fyq+mZV/XVVPVxVfzyNv6Kq7quq71fVZ6vqedP4hdPjw9Pz29f2nwAAAOujs/L8dJLXjzF+N8nOJFdX1RVJ/iTJzWOMHUmeSHLjtP2NSZ4YY/x2kpun7QAAYMNbNp7Hgl9ODy+YfkaS1yf53DR+e5Jrp/t7pseZnn9DVdWqzRgAAOakdcxzVW2qqgeSHE9yT5L/leRnY4xnpk2OJtk63d+a5NEkmZ5/MslLV3PSAAAwD614HmOcGGPsTLItyeVJXjVrs+l21irzOHWgqvZW1aGqOnTiqSe78wUAgLl5TmfbGGP8LMlXk1yR5OKq2jw9tS3JY9P9o0kuS5Lp+YuS/HTGex0YY+waY+za9IKLzmz2AACwjjpn27ikqi6e7v9Gkj9I8kiSryR5y7TZDUnunO7fNT3O9PyXxxinrTwDAMBGs3n5TbIlye1VtSkLsX3HGONLVfXdJJ+pqv+Q5K+S3Dptf2uS/1pVh7Ow4nz9GswbAADW3bLxPMZ4MMlrZ4z/IAvHP586/rdJrluV2QEAwFnEFQYBAKBJPAMAQJN4BgCAJvEMAABN4hkAAJrEMwAANIlnAABoEs8AANAkngEAoEk8AwBAk3gGAIAm8QwAAE3iGQAAmsQzAAA0iWcAAGgSzwAA0CSeAQCgSTwDAECTeAYAgCbxDAAATeIZAACaxDMAADSJZwAAaBLPAADQJJ4BAKBJPAMAQJN4BgCAJvEMAABN4hkAAJrEMwAANIlnAABoEs8AANAkngEAoEk8AwBAk3gGAIAm8QwAAE3iGQAAmsQzAAA0iWcAAGgSzwAA0CSeAQCgSTwDAECTeAYAgCbxDAAATeIZAACaxDMAADSJZwAAaBLPAADQJJ4BAKBJPAMAQJN4BgCAJvEMAABN4hkAAJrEMwAANIlnAABoEs8AANAkngEAoEk8AwBAk3gGAIAm8QwAAE3iGQAAmsQzAAA0iWcAAGgSzwAA0CSeAQCgSTwDAECTeAYAgCbxDAAATeIZAACaxDMAADSJZwAAaBLPAADQJJ4BAKBp2Xiuqsuq6itV9UhVPVxV757GP1RVP66qB6afaxa95v1VdbiqvldVb1zLfwAAAKyXzY1tnkny3jHGt6vqRUnur6p7puduHmP8x8UbV9Wrk1yf5DVJ/n6S/1FV/2CMcWI1Jw4AAOtt2ZXnMcaxMca3p/u/SPJIkq3P8pI9ST4zxnh6jPHDJIeTXL4akwUAgHl6Tsc8V9X2JK9Nct809K6qerCqbquqF09jW5M8uuhlRzMjtqtqb1UdqqpDJ5568jlPHAAA1ls7nqvqhUk+n+Q9Y4yfJ7klySuT7ExyLMlHTm464+XjtIExDowxdo0xdm16wUXPeeIAALDeWvFcVRdkIZw/Ncb4QpKMMR4fY5wYY/wqycfz60Mzjia5bNHLtyV5bPWmDAAA89E520YluTXJI2OMjy4a37JoszcneWi6f1eS66vqwqp6RZIdSb65elMGAID56Jxt48okb0vynap6YBr7QJK3VtXOLByScSTJO5NkjPFwVd2R5LtZOFPHTc60AQDAuWDZeB5jfD2zj2O++1le8+EkH17BvAAA4KzjCoMAANAkngEAoEk8AwBAk3gGAIAm8QwAAE3iGQAAmsQzAAA0iWcAAGgSzwAA0CSeAQCgSTwDAECTeAYAgCbxDAAATeIZAACaxDMAADSJZwAAaBLPAADQtHneE3iutu87OHP8yP7d6zwTAADON1aeAQCgSTwDAECTeAYAgCbxDAAATeIZAACaxDMAADSJZwAAaBLPAADQJJ4BAKBJPAMAQJN4BgCAJvEMAABN4hkAAJrEMwAANIlnAABoEs8AANAkngEAoEk8AwBAk3gGAIAm8QwAAE3iGQAAmsQzAAA0iWcAAGgSzwAA0CSeAQCgSTwDAECTeAYAgCbxDAAATeIZAACaxDMAADSJZwAAaBLPAADQJJ4BAKBJPAMAQJN4BgCAJvEMAABN4hkAAJrEMwAANIlnAABoEs8AANAkngEAoEk8AwBAk3gGAICmzfOeAH/X9n0HZ44f2b97nWcCAMCprDwDAECTeAYAgCbxDAAATeIZAACaxDMAADSJZwAAaBLPAADQJJ4BAKBJPAMAQJN4BgCApmXjuaouq6qvVNUjVfVwVb17Gn9JVd1TVd+fbl88jVdVfayqDlfVg1X1urX+RwAAwHrorDw/k+S9Y4xXJbkiyU1V9eok+5LcO8bYkeTe6XGSvCnJjulnb5JbVn3WAAAwB5uX22CMcSzJsen+L6rqkSRbk+xJctW02e1JvprkfdP4J8cYI8k3quriqtoyvc+a2b7v4MzxI/t3r+WvBQDgPPKcjnmuqu1JXpvkviSXngzi6fbl02Zbkzy66GVHpzEAANjQ2vFcVS9M8vkk7xlj/PzZNp0xNma8396qOlRVh0489WR3GgAAMDfLHraRJFV1QRbC+VNjjC9Mw4+fPByjqrYkOT6NH01y2aKXb0vy2KnvOcY4kORAkly4Zcdpcb1aZh3O4VAOAADOROdsG5Xk1iSPjDE+uuipu5LcMN2/Icmdi8bfPp1144okT6718c4AALAeOivPVyZ5W5LvVNUD09gHkuxPckdV3ZjkR0mum567O8k1SQ4neSrJO1Z1xgAAMCeds218PbOPY06SN8zYfiS5aYXzAgCAs44rDAIAQJN4BgCAJvEMAABN4hkAAJrEMwAANIlnAABoEs8AANAkngEAoEk8AwBAk3gGAIAm8QwAAE3iGQAAmsQzAAA0iWcAAGgSzwAA0CSeAQCgSTwDAECTeAYAgCbxDAAATeIZAACaxDMAADSJZwAAaBLPAADQJJ4BAKBJPAMAQJN4BgCAJvEMAABN4hkAAJrEMwAANIlnAABoEs8AANAkngEAoEk8AwBAk3gGAIAm8QwAAE2b5z2Bs8n2fQdPGzuyf/ccZgIAwNnIyjMAADSdlyvPs1aYAQBgOVaeAQCgSTwDAECTeAYAgCbxDAAATeIZAACaxDMAADSJZwAAaBLPAADQJJ4BAKBJPAMAQJN4BgCAJvEMAABN4hkAAJrEMwAANIlnAABoEs8AANAkngEAoEk8AwBAk3gGAIAm8QwAAE3iGQAAmsQzAAA0iWcAAGgSzwAA0CSeAQCgSTwDAECTeAYAgCbxDAAATZvnPQF6tu87eNrYkf275zATAIDzl5VnAABoEs8AANAkngEAoEk8AwBAky8MrqJZX+pLfLEPAOBcYeUZAACalo3nqrqtqo5X1UOLxj5UVT+uqgemn2sWPff+qjpcVd+rqjeu1cQBAGC9dVaeP5Hk6hnjN48xdk4/dydJVb06yfVJXjO95s+qatNqTRYAAOZp2WOexxhfq6rtzffbk+QzY4ynk/ywqg4nuTzJ/zzjGc6Z45gBADhpJV8YfFdVvT3JoSTvHWM8kWRrkm8s2uboNHaaqtqbZG+SbPqtS1YwjbOfAAcAODec6RcGb0nyyiQ7kxxL8pFpvGZsO2a9wRjjwBhj1xhj16YXXHSG0wAAgPVzRvE8xnh8jHFijPGrJB/PwqEZycJK82WLNt2W5LGVTREAAM4OZxTPVbVl0cM3Jzl5Jo67klxfVRdW1SuS7EjyzZVNEQAAzg7LHvNcVZ9OclWSl1XV0SQfTHJVVe3MwiEZR5K8M0nGGA9X1R1JvpvkmSQ3jTFOrM3UAQBgfXXOtvHWGcO3Psv2H07y4ZVMaiNY6kuAAACcu1xhEAAAmsQzAAA0iWcAAGgSzwAA0CSeAQCgSTwDAECTeAYAgKZlz/PM2Wupc00f2b97nWcCAHB+sPIMAABN4hkAAJrEMwAANIlnAABoEs8AANAkngEAoMmp6uZoqVPNAQBwdrLyDAAATeIZAACaxDMAADSJZwAAaBLPAADQJJ4BAKBJPAMAQJN4BgCAJvEMAABN4hkAAJrEMwAANIlnAABoEs8AANAkngEAoEk8AwBAk3gGAIAm8QwAAE3iGQAAmsQzAAA0iWcAAGjaPO8JsPq27zt42tiR/bvnMBMAgHOLlWcAAGgSzwAA0CSeAQCgSTwDAECTeAYAgCbxDAAATeIZAACaxDMAADSJZwAAaBLPAADQJJ4BAKBJPAMAQJN4BgCAJvEMAABN4hkAAJrEMwAANIlnAABoEs8AANAkngEAoEk8AwBA0+Z5T4D1sX3fwZnjR/bvXueZAABsXFaeAQCgSTwDAECTeAYAgCbxDAAATeIZAACaxDMAADSJZwAAaBLPAADQJJ4BAKBJPAMAQJN4BgCAJvEMAABN4hkAAJrEMwAANIlnAABoWjaeq+q2qjpeVQ8tGntJVd1TVd+fbl88jVdVfayqDlfVg1X1urWcPAAArKfOyvMnklx9yti+JPeOMXYkuXd6nCRvSrJj+tmb5JbVmSYAAMzfsvE8xvhakp+eMrwnye3T/duTXLto/JNjwTeSXFxVW1ZrsgAAME9neszzpWOMY0ky3b58Gt+a5NFF2x2dxgAAYMPbvMrvVzPGxswNq/Zm4dCObPqtS1Z5GnRt33dw5viR/bvXeSYAAGe/M115fvzk4RjT7fFp/GiSyxZtty3JY7PeYIxxYIyxa4yxa9MLLjrDaQAAwPo503i+K8kN0/0bkty5aPzt01k3rkjy5MnDOwAAYKNb9rCNqvp0kquSvKyqjib5YJL9Se6oqhuT/CjJddPmdye5JsnhJE8leccazBkAAOZi2XgeY7x1iafeMGPbkeSmlU4KAADORq4wCAAATeIZAACaxDMAADSJZwAAaBLPAADQJJ4BAKBptS/PzTli1mW7XbIbADjfWXkGAIAm8QwAAE3iGQAAmsQzAAA0iWcAAGgSzwAA0CSeAQCgSTwDAECTeAYAgCbxDAAATeIZAACaxDMAADSJZwAAaBLPAADQJJ4BAKBp87wnwMaxfd/BmeNH9u9e55kAAMyHlWcAAGgSzwAA0CSeAQCgSTwDAECTeAYAgCbxDAAATeIZAACaxDMAADSJZwAAaBLPAADQJJ4BAKBJPAMAQNPmeU8AlrJ938GZ40f2717nmQAALLDyDAAATeIZAACaxDMAADSJZwAAaBLPAADQJJ4BAKBJPAMAQJN4BgCAJvEMAABN4hkAAJrEMwAANIlnAABoEs8AANC0ed4TgCTZvu/gvKcAALAsK88AANAkngEAoEk8AwBAk3gGAIAm8QwAAE3OtsG6clYNAGAjs/IMAABN4hkAAJoctsGKzToU48j+3XOYCQDA2rLyDAAATeIZAACaxDMAADSJZwAAaBLPAADQJJ4BAKBJPAMAQJN4BgCAJvEMAABN4hkAAJrEMwAANIlnAABoEs8AANAkngEAoGnzSl5cVUeS/CLJiSTPjDF2VdVLknw2yfYkR5L8qzHGEyubJgAAzN9qrDz//hhj5xhj1/R4X5J7xxg7ktw7PQYAgA1vLQ7b2JPk9un+7UmuXYPfAQAA626l8TyS/GVV3V9Ve6exS8cYx5Jkun35rBdW1d6qOlRVh0489eQKpwEAAGtvRcc8J7lyjPFYVb08yT1V9TfdF44xDiQ5kCQXbtkxVjgPAABYcytaeR5jPDbdHk/yxSSXJ3m8qrYkyXR7fKWTBACAs8EZx3NV/WZVvejk/SR/mOShJHcluWHa7IYkd650kgAAcDZYyWEblyb5YlWdfJ8/H2P8RVV9K8kdVXVjkh8luW7l0wQAgPk743geY/wgye/OGP8/Sd6wkkkBAMDZyBUGAQCgSTwDAECTeAYAgCbxDAAATeIZAACaxDMAADSt9PLcMNP2fQfnPQUAgFVn5RkAAJrEMwAANIlnAABoEs8AANAkngEAoEk8AwBAk3gGAIAm8QwAAE0uksKGM+sCLEf2757DTACA842VZwAAaBLPAADQJJ4BAKBJPAMAQJN4BgCAJvEMAABN4hkAAJrEMwAANIlnAABocoVBzgmzrjqYuPIgALC6rDwDAECTeAYAgCbxDAAATY555pw261hox0EDAGfKyjMAADSJZwAAaBLPAADQJJ4BAKBJPAMAQJN4BgCAJvEMAABNzvMMZ2DW+aMT55AGgHOdeOa8I3wBgDPlsA0AAGiy8gwTK9IAwHKsPAMAQJN4BgCAJvEMAABN4hkAAJrEMwAANIlnAABoEs8AANAkngEAoEk8AwBAk3gGAIAml+eGZSx12W4A4Pxj5RkAAJrEMwAANIlnAABocswzrLGljpk+sn93e/ultgUA1peVZwAAaBLPAADQ5LANWEVOawcA5zYrzwAA0CSeAQCgSTwDAECTeAYAgCZfGIQ58eVCANh4rDwDAECTeAYAgCaHbcAG8Fwv8Q0ArA0rzwAA0CSeAQCgSTwDAECTeAYAgCZfGIQNbNYXCX2JEADWjpVnAABoWrN4rqqrq+p7VXW4qvat1e8BAID1siaHbVTVpiT/Kck/T3I0ybeq6q4xxnfX4vcBv/ZcLvu91CEeq/EeAHAuWquV58uTHB5j/GCM8X+TfCbJnjX6XQAAsC5qjLH6b1r1liRXjzH+zfT4bUl+b4zxrkXb7E2yd3r4O0keWvWJsNG9LMlP5j0Jzjr2C2axXzCL/YJZ/uEY40Vn+uK1OttGzRj7O5U+xjiQ5ECSVNWhMcauNZoLG5T9glnsF8xiv2AW+wWzVNWhlbx+rQ7bOJrkskWPtyV5bI1+FwAArIu1iudvJdlRVa+oqucluT7JXWv0uwAAYF2syWEbY4xnqupdSf57kk1JbhtjPPwsLzmwFvNgw7NfMIv9glnsF8xiv2CWFe0Xa/KFQQAAOBe5wiAAADSJZwAAaJp7PLuMNydV1ZGq+k5VPXDyNDJV9ZKquqeqvj/dvnje82RtVdVtVXW8qh5aNDZzP6gFH5s+Px6sqtfNb+aspSX2iw9V1Y+nz4wHquqaRc+9f9ovvldVb5zPrFlLVXVZVX2lqh6pqoer6t3TuM+L89iz7Ber9nkx13hedBnvNyV5dZK3VtWr5zkn5u73xxg7F52Xc1+Se8cYO5LcOz3m3PaJJFefMrbUfvCmJDumn71JblmnObL+PpHT94skuXn6zNg5xrg7Sab/jlyf5DXTa/5s+u8N55Znkrx3jPGqJFckuWn6397nxfltqf0iWaXPi3mvPLuMN8vZk+T26f7tSa6d41xYB2OMryX56SnDS+0He5J8ciz4RpKLq2rL+syU9bTEfrGUPUk+M8Z4eozxwySHs/DfG84hY4xjY4xvT/d/keSRJFvj8+K89iz7xVKe8+fFvON5a5JHFz0+mmf/B3JuG0n+sqruny7fniSXjjGOJQv/h0jy8rnNjnlaaj/wGcK7pj/B37bosC77xXmmqrYneW2S++Lzgskp+0WySp8X847nZS/jzXnlyjHG67Lwp7WbquqfzXtCnPV8hpzfbknyyiQ7kxxL8pFp3H5xHqmqFyb5fJL3jDF+/mybzhizX5yjZuwXq/Z5Me94dhlv/r8xxmPT7fEkX8zCn00eP/lnten2+PxmyBwttR/4DDmPjTEeH2OcGGP8KsnH8+s/tdovzhNVdUEWAulTY4wvTMM+L85zs/aL1fy8mHc8u4w3SZKq+s2qetHJ+0n+MMlDWdgfbpg2uyHJnfOZIXO21H5wV5K3T9+ivyLJkyf/XMu575TjVd+chc+MZGG/uL6qLqyqV2ThC2LfXO/5sbaqqpLcmuSRMcZHFz3l8+I8ttR+sZqfF2tyee6uM7iMN+euS5N8cWGfz+Ykfz7G+Iuq+laSO6rqxiQ/SnLdHOfIOqiqTye5KsnLqupokg8m2Z/Z+8HdSa7Jwhc8nkryjnWfMOtiif3iqqramYU/sR5J8s4kGWM8XFV3JPluFr55f9MY48Q85s2aujLJ25J8p6oemMY+EJ8X57ul9ou3rtbnhctzAwBA07wP2wAAgA1DPAMAQJN4BgCAJvEMAABN4hkAAJrEMwAANIlnAABo+n+uqc90FR8AXgAAAABJRU5ErkJggg==\n",
      "text/plain": [
       "<Figure size 864x864 with 1 Axes>"
      ]
     },
     "metadata": {
      "needs_background": "light"
     },
     "output_type": "display_data"
    },
    {
     "data": {
      "image/png": "iVBORw0KGgoAAAANSUhEUgAAAs8AAAKvCAYAAACVhiLtAAAABHNCSVQICAgIfAhkiAAAAAlwSFlzAAALEgAACxIB0t1+/AAAADh0RVh0U29mdHdhcmUAbWF0cGxvdGxpYiB2ZXJzaW9uMy4xLjMsIGh0dHA6Ly9tYXRwbG90bGliLm9yZy+AADFEAAAeAklEQVR4nO3dbYyl513f8d+/XuMQSO08a7u2tBFsWwIVm3RrLEWqQkIhsavaSKRyVCVW5Gqp5EhBoJYNbwCpSItUMIpULJk6jVMBwQKiWNiluE4ixIs8rINx7Jgo22QbL7Zs0SQmyCKVl39fzL3NYM96/t55OPvw+UijOec69zlzrXLn+KtrrrlPdXcAAIDN/b1VTwAAAM4X4hkAAIbEMwAADIlnAAAYEs8AADAkngEAYGgcz1V1SVX9aVX9wXL/dVX16ar6UlX9TlV9xzJ+2XL/+PL4/p2ZOgAA7K4Xs/L8viSPrrv/y0lu7e4DSb6e5OZl/OYkX+/u701y63IcAACc90bxXFVXJrkuyX9Z7leStyT53eWQO5PcsNy+frmf5fG3LscDAMB5bc/wuF9L8h+SvGy5/8ok3+juZ5f7J5PsW27vS/JYknT3s1X19HL8X65/wao6nORwktSlL/mnl77yyuf90H+y7/LxPwQAADbzwAMP/GV3v/psn79pPFfVv0zyVHc/UFVvPj28waE9eOzbA923J7k9SS7be6D33vRrz3vSsaPXbTY9AAAYq6r/vZXnT1ae35TkX1XVtUlekuTvZ20l+oqq2rOsPl+Z5PHl+JNJrkpysqr2JLk8yde2MkkAADgXbLrnubvf391Xdvf+JDcm+Xh3/5skn0jyE8thNyX52HL77uV+lsc/3t3PW3kGAIDzzVau8/yzSX66qo5nbU/zHcv4HUleuYz/dJIjW5siAACcG6Z/MJgk6e5PJvnkcvvLSa7e4Ji/SfKObZgbAACcU3zCIAAADIlnAAAYEs8AADAkngEAYEg8AwDAkHgGAIAh8QwAAEPiGQAAhsQzAAAMiWcAABgSzwAAMCSeAQBgSDwDAMCQeAYAgCHxDAAAQ+IZAACGxDMAAAyJZwAAGBLPAAAwJJ4BAGBIPAMAwJB4BgCAIfEMAABD4hkAAIbEMwAADIlnAAAYEs8AADAkngEAYEg8AwDAkHgGAIAh8QwAAEPiGQAAhsQzAAAMiWcAABgSzwAAMCSeAQBgSDwDAMCQeAYAgCHxDAAAQ+IZAACGxDMAAAyJZwAAGBLPAAAwJJ4BAGBIPAMAwJB4BgCAIfEMAABD4hkAAIbEMwAADIlnAAAYEs8AADAkngEAYEg8AwDAkHgGAIAh8QwAAEPiGQAAhsQzAAAMiWcAABgSzwAAMCSeAQBgSDwDAMCQeAYAgCHxDAAAQ+IZAACGxDMAAAyJZwAAGBLPAAAwJJ4BAGBIPAMAwJB4BgCAIfEMAABD4hkAAIbEMwAADG0az1X1kqr6TFX9WVU9UlW/uIx/qKq+UlUPLl8Hl/Gqqg9U1fGqeqiq3rjT/wgAANgNewbHfCvJW7r7r6vq0iR/UlX/fXns33f37z7n+LcnObB8/VCS25bvAABwXtt05bnX/PVy99Llq1/gKdcn+fDyvE8luaKq9m59qgAAsFqjPc9VdUlVPZjkqST3dfenl4d+admacWtVXbaM7Uvy2Lqnn1zGnvuah6vqWFUdO/XM01v4JwAAwO4YxXN3n+rug0muTHJ1Vf1Akvcn+cdJ/lmSVyT52eXw2uglNnjN27v7UHcfuuSll5/V5AEAYDe9qKttdPc3knwyydu6+4lla8a3kvzXJFcvh51MctW6p12Z5PFtmCsAAKzU5Gobr66qK5bb35nkR5L8+el9zFVVSW5I8vDylLuTvHu56sY1SZ7u7id2ZPYAALCLJlfb2Jvkzqq6JGuxfVd3/0FVfbyqXp21bRoPJvl3y/H3Jrk2yfEkzyR5z/ZPGwAAdt+m8dzdDyV5wwbjbznD8Z3klq1PDQAAzi0+YRAAAIbEMwAADIlnAAAYEs8AADAkngEAYEg8AwDAkHgGAIAh8QwAAEPiGQAAhsQzAAAMiWcAABgSzwAAMCSeAQBgSDwDAMCQeAYAgCHxDAAAQ+IZAACGxDMAAAyJZwAAGBLPAAAwJJ4BAGBIPAMAwJB4BgCAIfEMAABD4hkAAIbEMwAADIlnAAAYEs8AADAkngEAYEg8AwDAkHgGAIAh8QwAAEPiGQAAhsQzAAAMiWcAABgSzwAAMCSeAQBgSDwDAMCQeAYAgCHxDAAAQ+IZAACGxDMAAAyJZwAAGBLPAAAwJJ4BAGBIPAMAwJB4BgCAIfEMAABD4hkAAIbEMwAADIlnAAAYEs8AADAkngEAYEg8AwDAkHgGAIAh8QwAAEPiGQAAhsQzAAAMiWcAABgSzwAAMCSeAQBgSDwDAMCQeAYAgCHxDAAAQ+IZAACGxDMAAAyJZwAAGBLPAAAwJJ4BAGBIPAMAwJB4BgCAIfEMAABDm8ZzVb2kqj5TVX9WVY9U1S8u46+rqk9X1Zeq6neq6juW8cuW+8eXx/fv7D8BAAB2x2Tl+VtJ3tLdP5jkYJK3VdU1SX45ya3dfSDJ15PcvBx/c5Kvd/f3Jrl1OQ4AAM57m8Zzr/nr5e6ly1cneUuS313G70xyw3L7+uV+lsffWlW1bTMGAIAVGe15rqpLqurBJE8luS/J/0ryje5+djnkZJJ9y+19SR5LkuXxp5O8cjsnDQAAqzCK5+4+1d0Hk1yZ5Ook37fRYcv3jVaZ+7kDVXW4qo5V1bFTzzw9nS8AAKzMi7raRnd/I8knk1yT5Iqq2rM8dGWSx5fbJ5NclSTL45cn+doGr3V7dx/q7kOXvPTys5s9AADsosnVNl5dVVcst78zyY8keTTJJ5L8xHLYTUk+tty+e7mf5fGPd/fzVp4BAOB8s2fzQ7I3yZ1VdUnWYvuu7v6DqvpCko9U1X9M8qdJ7liOvyPJf6uq41lbcb5xB+YNAAC7btN47u6Hkrxhg/EvZ23/83PH/ybJO7ZldgAAcA7xCYMAADAkngEAYEg8AwDAkHgGAIAh8QwAAEPiGQAAhsQzAAAMiWcAABgSzwAAMCSeAQBgSDwDAMCQeAYAgCHxDAAAQ+IZAACGxDMAAAyJZwAAGBLPAAAwJJ4BAGBIPAMAwJB4BgCAIfEMAABD4hkAAIbEMwAADIlnAAAYEs8AADAkngEAYEg8AwDAkHgGAIAh8QwAAEPiGQAAhsQzAAAMiWcAABgSzwAAMCSeAQBgSDwDAMCQeAYAgCHxDAAAQ+IZAACGxDMAAAyJZwAAGBLPAAAwJJ4BAGBIPAMAwJB4BgCAIfEMAABD4hkAAIbEMwAADIlnAAAYEs8AADAkngEAYEg8AwDAkHgGAIAh8QwAAEPiGQAAhsQzAAAMiWcAABgSzwAAMCSeAQBgSDwDAMCQeAYAgCHxDAAAQ+IZAACGxDMAAAyJZwAAGBLPAAAwJJ4BAGBIPAMAwJB4BgCAIfEMAABD4hkAAIbEMwAADIlnAAAYEs8AADC0aTxX1VVV9YmqerSqHqmq9y3jv1BVf1FVDy5f1657zvur6nhVfbGqfmwn/wEAALBb9gyOeTbJz3T356rqZUkeqKr7lsdu7e7/tP7gqnp9khuTfH+Sf5Dkf1bVP+zuU9s5cQAA2G2brjx39xPd/bnl9jeTPJpk3ws85fokH+nub3X3V5IcT3L1dkwWAABW6UXtea6q/UnekOTTy9B7q+qhqvpgVb18GduX5LF1TzuZDWK7qg5X1bGqOnbqmadf9MQBAGC3jeO5qr47ye8l+anu/qsktyX5niQHkzyR5FdOH7rB0/t5A923d/eh7j50yUsvf9ETBwCA3TaK56q6NGvh/Jvd/ftJ0t1Pdvep7v7bJL+Rb2/NOJnkqnVPvzLJ49s3ZQAAWI3J1TYqyR1JHu3uX103vnfdYT+e5OHl9t1Jbqyqy6rqdUkOJPnM9k0ZAABWY3K1jTcleVeSz1fVg8vYzyV5Z1UdzNqWjBNJfjJJuvuRqroryReydqWOW1xpAwCAC8Gm8dzdf5KN9zHf+wLP+aUkv7SFeQEAwDnHJwwCAMCQeAYAgCHxDAAAQ+IZAACGxDMAAAyJZwAAGBLPAAAwJJ4BAGBIPAMAwJB4BgCAIfEMAABD4hkAAIbEMwAADIlnAAAYEs8AADAkngEAYEg8AwDAkHgGAIAh8QwAAEPiGQAAhsQzAAAMiWcAABgSzwAAMLRn1RN4IfuP3PO8sRNHr1vBTAAAwMozAACMiWcAABgSzwAAMCSeAQBgSDwDAMCQeAYAgCHxDAAAQ+IZAACGxDMAAAyJZwAAGBLPAAAwJJ4BAGBIPAMAwJB4BgCAIfEMAABD4hkAAIbEMwAADIlnAAAYEs8AADAkngEAYEg8AwDA0J5VT4C/a/+RezYcP3H0ul2eCQAAz2XlGQAAhsQzAAAMiWcAABgSzwAAMCSeAQBgSDwDAMCQeAYAgCHxDAAAQ+IZAACGxDMAAAyJZwAAGBLPAAAwJJ4BAGBIPAMAwJB4BgCAIfEMAABD4hkAAIbEMwAADIlnAAAYEs8AADAkngEAYEg8AwDAkHgGAIAh8QwAAEPiGQAAhsQzAAAMbRrPVXVVVX2iqh6tqkeq6n3L+Cuq6r6q+tLy/eXLeFXVB6rqeFU9VFVv3Ol/BAAA7IbJyvOzSX6mu78vyTVJbqmq1yc5kuT+7j6Q5P7lfpK8PcmB5etwktu2fdYAALACm8Zzdz/R3Z9bbn8zyaNJ9iW5Psmdy2F3JrlhuX19kg/3mk8luaKq9m77zAEAYJe9qD3PVbU/yRuSfDrJa7v7iWQtsJO8ZjlsX5LH1j3t5DIGAADntXE8V9V3J/m9JD/V3X/1QoduMNYbvN7hqjpWVcdOPfP0dBoAALAyeyYHVdWlWQvn3+zu31+Gn6yqvd39xLIt46ll/GSSq9Y9/cokjz/3Nbv79iS3J8llew88L67PZP+RezYcP3H0uulLAADAWZlcbaOS3JHk0e7+1XUP3Z3kpuX2TUk+tm783ctVN65J8vTp7R0AAHA+m6w8vynJu5J8vqoeXMZ+LsnRJHdV1c1JvprkHctj9ya5NsnxJM8kec+2zhgAAFZk03ju7j/JxvuYk+StGxzfSW7Z4rwAAOCc4xMGAQBgSDwDAMCQeAYAgCHxDAAAQ+IZAACGxDMAAAyJZwAAGBLPAAAwJJ4BAGBIPAMAwJB4BgCAIfEMAABD4hkAAIbEMwAADIlnAAAYEs8AADAkngEAYEg8AwDAkHgGAIAh8QwAAEPiGQAAhsQzAAAMiWcAABgSzwAAMCSeAQBgSDwDAMCQeAYAgCHxDAAAQ+IZAACGxDMAAAyJZwAAGBLPAAAwJJ4BAGBIPAMAwJB4BgCAIfEMAABD4hkAAIbEMwAADIlnAAAYEs8AADAkngEAYEg8AwDAkHgGAIAh8QwAAEPiGQAAhsQzAAAMiWcAABgSzwAAMCSeAQBgSDwDAMCQeAYAgCHxDAAAQ+IZAACGxDMAAAyJZwAAGBLPAAAwJJ4BAGBoz6onsF32H7lnw/ETR6/b5ZkAAHChsvIMAABD4hkAAIbEMwAADIlnAAAYEs8AADAkngEAYEg8AwDAkHgGAIAh8QwAAEPiGQAAhsQzAAAMiWcAABjas+oJXMz2H7ln1VMAAOBFsPIMAABD4hkAAIY2jeeq+mBVPVVVD68b+4Wq+ouqenD5unbdY++vquNV9cWq+rGdmjgAAOy2ycrzh5K8bYPxW7v74PJ1b5JU1euT3Jjk+5fn/HpVXbJdkwUAgFXaNJ67+4+TfG34etcn+Uh3f6u7v5LkeJKrtzA/AAA4Z2xlz/N7q+qhZVvHy5exfUkeW3fMyWXsearqcFUdq6pjp555egvTAACA3XG28Xxbku9JcjDJE0l+ZRmvDY7tjV6gu2/v7kPdfeiSl15+ltMAAIDdc1bx3N1Pdvep7v7bJL+Rb2/NOJnkqnWHXpnk8a1NEQAAzg1nFc9VtXfd3R9PcvpKHHcnubGqLquq1yU5kOQzW5siAACcGzb9hMGq+u0kb07yqqo6meTnk7y5qg5mbUvGiSQ/mSTd/UhV3ZXkC0meTXJLd5/amakDAMDuqu4NtyTvqsv2Hui9N/3arv28E0ev27WflWzPx3Dv9pwBAC5EVfVAdx862+f7hEEAABgSzwAAMCSeAQBgSDwDAMCQeAYAgCHxDAAAQ5te55lzw0aXu3P5OgCA3SWet9F2XM8ZAIBzl20bAAAwZOV5HVsjAAB4IVaeAQBgSDwDAMCQeAYAgCHxDAAAQ/5gcBNnuvycPyQEALj4WHkGAIAh8QwAAEMX5bYNnwQIAMDZsPIMAABD4hkAAIYuym0b28HWDwCAi4+VZwAAGBLPAAAwJJ4BAGBIPAMAwJB4BgCAIfEMAABD4hkAAIbEMwAADIlnAAAYEs8AADAkngEAYEg8AwDAkHgGAIAh8QwAAEPiGQAAhsQzAAAMiWcAABgSzwAAMCSeAQBgSDwDAMCQeAYAgCHxDAAAQ+IZAACGxDMAAAyJZwAAGNqz6glw9vYfuWfD8RNHr9vlmQAAXBysPAMAwJB4BgCAIfEMAABD4hkAAIbEMwAADIlnAAAYEs8AADAkngEAYEg8AwDAkHgGAIAh8QwAAEPiGQAAhsQzAAAMiWcAABjas+oJsDv2H7lnw/ETR6/b5ZkAAJy/rDwDAMCQeAYAgCHxDAAAQ+IZAACGxDMAAAyJZwAAGBLPAAAwJJ4BAGBIPAMAwJB4BgCAoU3juao+WFVPVdXD68ZeUVX3VdWXlu8vX8arqj5QVcer6qGqeuNOTh4AAHbTZOX5Q0ne9pyxI0nu7+4DSe5f7ifJ25McWL4OJ7lte6YJAACrt2k8d/cfJ/nac4avT3LncvvOJDesG/9wr/lUkiuqau92TRYAAFbpbPc8v7a7n0iS5ftrlvF9SR5bd9zJZQwAAM572/0Hg7XBWG94YNXhqjpWVcdOPfP0Nk8DAAC239nG85Ont2Ms359axk8muWrdcVcmeXyjF+ju27v7UHcfuuSll5/lNAAAYPecbTzfneSm5fZNST62bvzdy1U3rkny9OntHQAAcL7bs9kBVfXbSd6c5FVVdTLJzyc5muSuqro5yVeTvGM5/N4k1yY5nuSZJO/ZgTkDAMBKbBrP3f3OMzz01g2O7SS3bHVSAABwLto0njn/7D9yz6qnAABwQfLx3AAAMCSeAQBgSDwDAMCQeAYAgCHxDAAAQ+IZAACGxDMAAAyJZwAAGBLPAAAwJJ4BAGBIPAMAwJB4BgCAIfEMAABDe1Y9AVZr/5F7Nhw/cfS6XZ4JAMC5z8ozAAAMiWcAABgSzwAAMCSeAQBgSDwDAMCQeAYAgCGXqmPMZe0AgIudeGbLNopqQQ0AXIhs2wAAgCErz5yzbBMBAM41Vp4BAGBIPAMAwJB4BgCAIfEMAABD4hkAAIbEMwAADIlnAAAYEs8AADAkngEAYEg8AwDAkHgGAIAh8QwAAEN7Vj0Bzk37j9yz6ikAAJxzrDwDAMCQeAYAgCHxDAAAQ+IZAACGxDMAAAyJZwAAGBLPAAAwJJ4BAGBIPAMAwJB4BgCAIfEMAABD4hkAAIbEMwAADIlnAAAYEs8AADC0Z9UT4OKy/8g9G46fOHrdLs8EAODFs/IMAABD4hkAAIbEMwAADNnzzDnhTHuhAQDOJVaeAQBgSDwDAMCQbRvsCNswAIALkZVnAAAYEs8AADAkngEAYEg8AwDAkHgGAIAh8QwAAEPiGQAAhsQzAAAMiWcAABgSzwAAMCSeAQBgSDwDAMDQnq08uapOJPlmklNJnu3uQ1X1iiS/k2R/khNJ/nV3f31r0wQAgNXbjpXnH+7ug919aLl/JMn93X0gyf3LfQAAOO/txLaN65Pcudy+M8kNO/AzAABg1201njvJH1XVA1V1eBl7bXc/kSTL99ds9MSqOlxVx6rq2Klnnt7iNAAAYOdtac9zkjd19+NV9Zok91XVn0+f2N23J7k9SS7be6C3OA8AANhxW1p57u7Hl+9PJflokquTPFlVe5Nk+f7UVicJAADngrOO56r6rqp62enbSX40ycNJ7k5y03LYTUk+ttVJAgDAuWAr2zZem+SjVXX6dX6ru/+wqj6b5K6qujnJV5O8Y+vTBACA1TvreO7uLyf5wQ3G/0+St25lUgAAcC7yCYMAADC01attwK7bf+Se542dOHrdCmYCAFxsrDwDAMCQeAYAgCHxDAAAQ+IZAACGxDMAAAyJZwAAGBLPAAAwJJ4BAGBIPAMAwJB4BgCAIfEMAABD4hkAAIbEMwAADIlnAAAYEs8AADAkngEAYEg8AwDAkHgGAIAh8QwAAEPiGQAAhsQzAAAMiWcAABjas+oJwE7af+Se8bEnjl63gzMBAC4EVp4BAGBIPAMAwJB4BgCAIfEMAABD4hkAAIbEMwAADIlnAAAYcp1nLggv5nrOAABny8ozAAAMiWcAABgSzwAAMCSeAQBgSDwDAMCQeAYAgCHxDAAAQ67zDIszXSv6xNHrdnkmAMC5ysozAAAMiWcAABgSzwAAMCSeAQBgSDwDAMCQq23AJja6CocrcADAxcnKMwAADFl5hrPgmtAAcHGy8gwAAENWnmEb7dT+aCvdAHBusPIMAABD4hkAAIbEMwAADIlnAAAY8geDsMP8sR8AXDisPAMAwJB4BgCAIfEMAABD9jzDitgLDQDnHyvPAAAwJJ4BAGBIPAMAwJB4BgCAIfEMAABD4hkAAIZcqg7OY2e63N1GXAIPALbOyjMAAAyJZwAAGLJtA3gen34IABuz8gwAAENWnuEi9mL+4BAAsPIMAABjOxbPVfW2qvpiVR2vqiM79XMAAGC37Mi2jaq6JMl/TvIvkpxM8tmquru7v7ATPw8uJDu1lWK3t2hs9PP8wSEA57udWnm+Osnx7v5yd//fJB9Jcv0O/SwAANgV1d3b/6JVP5Hkbd39b5f770ryQ9393nXHHE5yeLn7A0ke3vaJcL57VZK/XPUkOOc4L9iI84KNOC/YyD/q7ped7ZN36mobtcHY36n07r49ye1JUlXHuvvQDs2F85Tzgo04L9iI84KNOC/YSFUd28rzd2rbxskkV627f2WSx3foZwEAwK7YqXj+bJIDVfW6qvqOJDcmuXuHfhYAAOyKHdm20d3PVtV7k/yPJJck+WB3P/ICT7l9J+bBec95wUacF2zEecFGnBdsZEvnxY78wSAAAFyIfMIgAAAMiWcAABhaeTz7GG9Oq6oTVfX5qnrw9GVkquoVVXVfVX1p+f7yVc+TnVVVH6yqp6rq4XVjG54HteYDy/vHQ1X1xtXNnJ10hvPiF6rqL5b3jAer6tp1j71/OS++WFU/tppZs5Oq6qqq+kRVPVpVj1TV+5Zx7xcXsRc4L7bt/WKl8bzuY7zfnuT1Sd5ZVa9f5ZxYuR/u7oPrrst5JMn93X0gyf3LfS5sH0rytueMnek8eHuSA8vX4SS37dIc2X0fyvPPiyS5dXnPONjd9ybJ8t+RG5N8//KcX1/+e8OF5dkkP9Pd35fkmiS3LP/be7+4uJ3pvEi26f1i1SvPPsabzVyf5M7l9p1JbljhXNgF3f3HSb72nOEznQfXJ/lwr/lUkiuqau/uzJTddIbz4kyuT/KR7v5Wd38lyfGs/feGC0h3P9Hdn1tufzPJo0n2xfvFRe0FzoszedHvF6uO531JHlt3/2Re+B/Iha2T/FFVPbB8fHuSvLa7n0jW/g+R5DUrmx2rdKbzwHsI711+Bf/Bddu6nBcXmaran+QNST4d7xcsnnNeJNv0frHqeN70Y7y5qLypu9+YtV+t3VJV/3zVE+Kc5z3k4nZbku9JcjDJE0l+ZRl3XlxEquq7k/xekp/q7r96oUM3GHNeXKA2OC+27f1i1fHsY7z5/7r78eX7U0k+mrVfmzx5+tdqy/enVjdDVuhM54H3kItYdz/Z3ae6+2+T/Ea+/atW58VFoqouzVog/WZ3//4y7P3iIrfRebGd7xerjmcf402SpKq+q6pedvp2kh9N8nDWzoeblsNuSvKx1cyQFTvTeXB3kncvf0V/TZKnT/+6lgvfc/ar/njW3jOStfPixqq6rKpel7U/EPvMbs+PnVVVleSOJI9296+ue8j7xUXsTOfFdr5f7MjHc0+dxcd4c+F6bZKPrp3z2ZPkt7r7D6vqs0nuqqqbk3w1yTtWOEd2QVX9dpI3J3lVVZ1M8vNJjmbj8+DeJNdm7Q88nknynl2fMLviDOfFm6vqYNZ+xXoiyU8mSXc/UlV3JflC1v7y/pbuPrWKebOj3pTkXUk+X1UPLmM/F+8XF7sznRfv3K73Cx/PDQAAQ6vetgEAAOcN8QwAAEPiGQAAhsQzAAAMiWcAABgSzwAAMCSeAQBg6P8BQvfVzUCdV9gAAAAASUVORK5CYII=\n",
      "text/plain": [
       "<Figure size 864x864 with 1 Axes>"
      ]
     },
     "metadata": {
      "needs_background": "light"
     },
     "output_type": "display_data"
    },
    {
     "data": {
      "image/png": "iVBORw0KGgoAAAANSUhEUgAAAs8AAAKvCAYAAACVhiLtAAAABHNCSVQICAgIfAhkiAAAAAlwSFlzAAALEgAACxIB0t1+/AAAADh0RVh0U29mdHdhcmUAbWF0cGxvdGxpYiB2ZXJzaW9uMy4xLjMsIGh0dHA6Ly9tYXRwbG90bGliLm9yZy+AADFEAAAeA0lEQVR4nO3dbaxl51nf4f9dj3EIpHbe5Y4tTQTTlkCFk06NpUhVSCg4HlQbiVSOqsSKXA2VHCkI1DLhCyA10iAVTCMVSwancSogWEAUC7sU10mE+JCXcTCOHRNlmkzjwZYtmsQEWaTycPfDWdOc2md8bs952fNyXdLR3vvZa+/zjLKy/dNz1l6rujsAAMDm/t6qJwAAAOcK8QwAAEPiGQAAhsQzAAAMiWcAABgSzwAAMDSO56q6qKr+rKr+cHn8uqr6dFV9qap+t6q+Yxm/ZHl8bHl+385MHQAAdteLWXl+b5JH1z3+5SS3dvf+JF9PcvMyfnOSr3f39ya5ddkOAADOeaN4rqorkhxM8pvL40ryliS/t2xyZ5IblvvXL4+zPP/WZXsAADin7Rlu92tJ/n2Sly2PX5nkG9397PL4RJK9y/29SR5Lku5+tqqeXrb/q/VvWFWHkhxKkrr4Jf/04lde8bxf+k/2Xjr+hwAAwGYeeOCBv+ruV5/p6zeN56r68SRPdfcDVfXmU8MbbNqD57490H17ktuT5JLL9/flN/3a81509MjBzaYHAABjVfW/tvL6ycrzm5L8y6q6LslLkvz9rK1EX1ZVe5bV5yuSPL5sfyLJlUlOVNWeJJcm+dpWJgkAAGeDTY957u73dfcV3b0vyY1JPt7d/zrJJ5L85LLZTUk+tty/e3mc5fmPd/fzVp4BAOBcs5XzPP9ckp+pqmNZO6b5jmX8jiSvXMZ/JsnhrU0RAADODtMvDCZJuvuTST653P9ykqs32OZvk7x9G+YGAABnFVcYBACAIfEMAABD4hkAAIbEMwAADIlnAAAYEs8AADAkngEAYEg8AwDAkHgGAIAh8QwAAEPiGQAAhsQzAAAMiWcAABgSzwAAMCSeAQBgSDwDAMCQeAYAgCHxDAAAQ+IZAACGxDMAAAyJZwAAGBLPAAAwJJ4BAGBIPAMAwJB4BgCAIfEMAABD4hkAAIbEMwAADIlnAAAYEs8AADAkngEAYEg8AwDAkHgGAIAh8QwAAEPiGQAAhsQzAAAMiWcAABgSzwAAMCSeAQBgSDwDAMCQeAYAgCHxDAAAQ+IZAACGxDMAAAyJZwAAGBLPAAAwJJ4BAGBIPAMAwJB4BgCAIfEMAABD4hkAAIbEMwAADIlnAAAYEs8AADAkngEAYEg8AwDAkHgGAIAh8QwAAEPiGQAAhsQzAAAMiWcAABgSzwAAMCSeAQBgSDwDAMCQeAYAgCHxDAAAQ+IZAACGxDMAAAyJZwAAGBLPAAAwJJ4BAGBIPAMAwJB4BgCAoU3juapeUlWfqao/r6pHquqXlvEPVdVXqurB5eeqZbyq6gNVdayqHqqqN+70PwIAAHbDnsE230rylu7+m6q6OMmfVtV/W577d939e8/Z/m1J9i8/P5TktuUWAADOaZuuPPeav1keXrz89Au85PokH15e96kkl1XV5VufKgAArNbomOequqiqHkzyVJL7uvvTy1PvXw7NuLWqLlnG9iZ5bN3LTyxjz33PQ1V1tKqOnnzm6S38EwAAYHeM4rm7T3b3VUmuSHJ1Vf1Akvcl+cdJ/lmSVyT5uWXz2ugtNnjP27v7QHcfuOill57R5AEAYDe9qLNtdPc3knwyybXd/cRyaMa3kvyXJFcvm51IcuW6l12R5PFtmCsAAKzU5Gwbr66qy5b735nkR5L8xanjmKuqktyQ5OHlJXcneddy1o1rkjzd3U/syOwBAGAXTc62cXmSO6vqoqzF9l3d/YdV9fGqenXWDtN4MMm/Xba/N8l1SY4leSbJu7d/2gAAsPs2jefufijJGzYYf8tptu8kt2x9agAAcHZxhUEAABgSzwAAMCSeAQBgSDwDAMCQeAYAgCHxDAAAQ+IZAACGxDMAAAyJZwAAGBLPAAAwJJ4BAGBIPAMAwJB4BgCAIfEMAABD4hkAAIbEMwAADIlnAAAYEs8AADAkngEAYEg8AwDAkHgGAIAh8QwAAEPiGQAAhsQzAAAMiWcAABgSzwAAMCSeAQBgSDwDAMCQeAYAgCHxDAAAQ+IZAACGxDMAAAyJZwAAGBLPAAAwJJ4BAGBIPAMAwJB4BgCAIfEMAABD4hkAAIbEMwAADIlnAAAYEs8AADAkngEAYEg8AwDAkHgGAIAh8QwAAEPiGQAAhsQzAAAMiWcAABgSzwAAMCSeAQBgSDwDAMCQeAYAgCHxDAAAQ3tWPYEXsu/wPc8bO37k4ApmAgAAVp4BAGBMPAMAwJB4BgCAIfEMAABD4hkAAIbEMwAADIlnAAAYEs8AADAkngEAYEg8AwDAkHgGAIAh8QwAAEPiGQAAhsQzAAAMiWcAABgSzwAAMCSeAQBgaNN4rqqXVNVnqurPq+qRqvqlZfx1VfXpqvpSVf1uVX3HMn7J8vjY8vy+nf0nAADA7pisPH8ryVu6+weTXJXk2qq6JskvJ7m1u/cn+XqSm5ftb07y9e7+3iS3LtsBAMA5b9N47jV/szy8ePnpJG9J8nvL+J1JbljuX788zvL8W6uqtm3GAACwIqNjnqvqoqp6MMlTSe5L8j+TfKO7n102OZFk73J/b5LHkmR5/ukkr9zOSQMAwCqM4rm7T3b3VUmuSHJ1ku/baLPldqNV5n7uQFUdqqqjVXX05DNPT+cLAAAr86LOttHd30jyySTXJLmsqvYsT12R5PHl/okkVybJ8vylSb62wXvd3t0HuvvARS+99MxmDwAAu2hyto1XV9Vly/3vTPIjSR5N8okkP7lsdlOSjy33714eZ3n+4939vJVnAAA41+zZfJNcnuTOqrooa7F9V3f/YVV9IclHquo/JPmzJHcs29+R5L9W1bGsrTjfuAPzBgCAXbdpPHf3Q0nesMH4l7N2/PNzx/82ydu3ZXYAAHAWcYVBAAAYEs8AADAkngEAYEg8AwDAkHgGAIAh8QwAAEPiGQAAhsQzAAAMiWcAABgSzwAAMCSeAQBgSDwDAMCQeAYAgCHxDAAAQ+IZAACGxDMAAAyJZwAAGBLPAAAwJJ4BAGBIPAMAwJB4BgCAIfEMAABD4hkAAIbEMwAADIlnAAAYEs8AADAkngEAYEg8AwDAkHgGAIAh8QwAAEPiGQAAhsQzAAAMiWcAABgSzwAAMCSeAQBgSDwDAMCQeAYAgCHxDAAAQ+IZAACGxDMAAAyJZwAAGBLPAAAwJJ4BAGBIPAMAwJB4BgCAIfEMAABD4hkAAIbEMwAADIlnAAAYEs8AADAkngEAYEg8AwDAkHgGAIAh8QwAAEPiGQAAhsQzAAAMiWcAABgSzwAAMCSeAQBgSDwDAMCQeAYAgCHxDAAAQ+IZAACGxDMAAAyJZwAAGBLPAAAwJJ4BAGBIPAMAwJB4BgCAIfEMAABD4hkAAIbEMwAADIlnAAAY2jSeq+rKqvpEVT1aVY9U1XuX8V+sqr+sqgeXn+vWveZ9VXWsqr5YVT+2k/8AAADYLXsG2zyb5Ge7+3NV9bIkD1TVfctzt3b3f1y/cVW9PsmNSb4/yT9I8j+q6h9298ntnDgAAOy2TVeeu/uJ7v7ccv+bSR5NsvcFXnJ9ko9097e6+ytJjiW5ejsmCwAAq/Sijnmuqn1J3pDk08vQe6rqoar6YFW9fBnbm+SxdS87kQ1iu6oOVdXRqjp68pmnX/TEAQBgt43juaq+O8nvJ/np7v7rJLcl+Z4kVyV5IsmvnNp0g5f38wa6b+/uA9194KKXXvqiJw4AALttFM9VdXHWwvm3uvsPkqS7n+zuk939d0l+I98+NONEkivXvfyKJI9v35QBAGA1JmfbqCR3JHm0u3913fjl6zb7iSQPL/fvTnJjVV1SVa9Lsj/JZ7ZvygAAsBqTs228Kck7k3y+qh5cxn4+yTuq6qqsHZJxPMlPJUl3P1JVdyX5QtbO1HGLM20AAHA+2DSeu/tPs/FxzPe+wGven+T9W5gXAACcdVxhEAAAhsQzAAAMiWcAABgSzwAAMCSeAQBgSDwDAMCQeAYAgCHxDAAAQ+IZAACGxDMAAAyJZwAAGBLPAAAwJJ4BAGBIPAMAwJB4BgCAIfEMAABD4hkAAIbEMwAADIlnAAAYEs8AADAkngEAYEg8AwDAkHgGAIAh8QwAAEPiGQAAhvasegIv1r7D92w4fvzIwV2eCQAAFxorzwAAMCSeAQBgSDwDAMCQeAYAgCHxDAAAQ+IZAACGxDMAAAyJZwAAGBLPAAAwdM5dYfB85wqKAABnLyvPAAAwJJ4BAGBIPAMAwJB4BgCAIfEMAABD4hkAAIbEMwAADIlnAAAYEs8AADAkngEAYEg8AwDAkHgGAIAh8QwAAEPiGQAAhsQzAAAMiWcAABgSzwAAMCSeAQBgSDwDAMCQeAYAgCHxDAAAQ+IZAACGxDMAAAyJZwAAGBLPAAAwJJ4BAGBIPAMAwJB4BgCAIfEMAABD4hkAAIbEMwAADIlnAAAYEs8AADAkngEAYEg8AwDAkHgGAIChTeO5qq6sqk9U1aNV9UhVvXcZf0VV3VdVX1puX76MV1V9oKqOVdVDVfXGnf5HAADAbpisPD+b5Ge7+/uSXJPklqp6fZLDSe7v7v1J7l8eJ8nbkuxffg4luW3bZw0AACuwaTx39xPd/bnl/jeTPJpkb5Lrk9y5bHZnkhuW+9cn+XCv+VSSy6rq8m2fOQAA7LIXdcxzVe1L8oYkn07y2u5+IlkL7CSvWTbbm+SxdS87sYwBAMA5bRzPVfXdSX4/yU9391+/0KYbjPUG73eoqo5W1dGTzzw9nQYAAKzMKJ6r6uKshfNvdfcfLMNPnjocY7l9ahk/keTKdS+/Isnjz33P7r69uw9094GLXnrpmc4fAAB2zeRsG5XkjiSPdvevrnvq7iQ3LfdvSvKxdePvWs66cU2Sp08d3gEAAOeyPYNt3pTknUk+X1UPLmM/n+RIkruq6uYkX03y9uW5e5Ncl+RYkmeSvHtbZwwAACuyaTx3959m4+OYk+StG2zfSW7Z4rwAAOCs4wqDAAAwJJ4BAGBIPAMAwNDkC4PnhH2H79lw/PiRg7s8EwAAzlfnTTyfDQQ8AMD5zWEbAAAwJJ4BAGBIPAMAwJB4BgCAIfEMAABD4hkAAIbEMwAADIlnAAAYEs8AADAkngEAYEg8AwDAkHgGAIAh8QwAAEPiGQAAhsQzAAAMiWcAABgSzwAAMCSeAQBgSDwDAMCQeAYAgCHxDAAAQ+IZAACGxDMAAAyJZwAAGBLPAAAwJJ4BAGBoz6onsNP2Hb7neWPHjxxcwUwAADjXWXkGAIAh8QwAAEPn/WEbO2Wjw0EAADi/ieddcLrQduw1AMC5xWEbAAAwJJ4BAGBIPAMAwJB4BgCAIV8Y3ISzagAAcIqVZwAAGLogV56dOg4AgDNh5RkAAIbEMwAADIlnAAAYEs8AADAkngEAYEg8AwDAkHgGAIAh8QwAAEPiGQAAhsQzAAAMiWcAABgSzwAAMCSeAQBgSDwDAMCQeAYAgCHxDAAAQ+IZAACG9qx6AmeTfYfvWfUUAAA4i1l5BgCAIfEMAABD4hkAAIbEMwAADPnC4Ar5giIAwLnFyjMAAAyJZwAAGBLPAAAwJJ4BAGBIPAMAwJB4BgCAIfEMAABDm8ZzVX2wqp6qqofXjf1iVf1lVT24/Fy37rn3VdWxqvpiVf3YTk0cAAB222Tl+UNJrt1g/Nbuvmr5uTdJqur1SW5M8v3La369qi7arskCAMAqbRrP3f0nSb42fL/rk3yku7/V3V9JcizJ1VuYHwAAnDW2cszze6rqoeWwjpcvY3uTPLZumxPL2PNU1aGqOlpVR08+8/QWpgEAALvjTOP5tiTfk+SqJE8k+ZVlvDbYtjd6g+6+vbsPdPeBi1566RlOAwAAds8ZxXN3P9ndJ7v775L8Rr59aMaJJFeu2/SKJI9vbYoAAHB2OKN4rqrL1z38iSSnzsRxd5Ibq+qSqnpdkv1JPrO1KQIAwNlhz2YbVNXvJHlzkldV1Ykkv5DkzVV1VdYOyTie5KeSpLsfqaq7knwhybNJbunukzszdQAA2F2bxnN3v2OD4TteYPv3J3n/ViYFAABnI1cYBACAIfEMAABD4hkAAIbEMwAADIlnAAAYEs8AADAkngEAYEg8AwDAkHgGAIChTa8wyNlh3+F7njd2/MjBFcwEAODCZeUZAACGxDMAAAyJZwAAGBLPAAAwJJ4BAGBIPAMAwJB4BgCAIfEMAABD4hkAAIbEMwAADIlnAAAYEs8AADAkngEAYEg8AwDAkHgGAIAh8QwAAEPiGQAAhsQzAAAMiWcAABgSzwAAMCSeAQBgSDwDAMCQeAYAgCHxDAAAQ+IZAACGxDMAAAyJZwAAGBLPAAAwJJ4BAGBIPAMAwNCeVU+AM7fv8D0bjh8/cnCXZwIAcGEQzxcIoQ0AsHUO2wAAgCHxDAAAQ+IZAACGxDMAAAyJZwAAGBLPAAAwJJ4BAGBIPAMAwJB4BgCAIfEMAABD4hkAAIbEMwAADIlnAAAYEs8AADAkngEAYEg8AwDAkHgGAIChPaueANtv3+F7Vj0FAIDzkpVnAAAYEs8AADAkngEAYEg8AwDAkHgGAIAh8QwAAEPiGQAAhsQzAAAMiWcAABgSzwAAMCSeAQBgSDwDAMDQpvFcVR+sqqeq6uF1Y6+oqvuq6kvL7cuX8aqqD1TVsap6qKreuJOTBwCA3TRZef5QkmufM3Y4yf3dvT/J/cvjJHlbkv3Lz6Ekt23PNAEAYPU2jefu/pMkX3vO8PVJ7lzu35nkhnXjH+41n0pyWVVdvl2TBQCAVTrTY55f291PJMly+5plfG+Sx9Ztd2IZAwCAc952f2GwNhjrDTesOlRVR6vq6Mlnnt7maQAAwPY703h+8tThGMvtU8v4iSRXrtvuiiSPb/QG3X17dx/o7gMXvfTSM5wGAADsnjON57uT3LTcvynJx9aNv2s568Y1SZ4+dXgHAACc6/ZstkFV/U6SNyd5VVWdSPILSY4kuauqbk7y1SRvXza/N8l1SY4leSbJu3dgzgAAsBKbxnN3v+M0T711g207yS1bnRQAAJyNXGEQAACGxDMAAAyJZwAAGBLPAAAwJJ4BAGBIPAMAwJB4BgCAIfEMAABD4hkAAIbEMwAADIlnAAAYEs8AADAkngEAYEg8AwDA0J5VT4DV2nf4ng3Hjx85uMszAQA4+1l5BgCAISvPbGijFWmr0QDAhc7KMwAADIlnAAAYEs8AADAkngEAYEg8AwDAkHgGAIAh8QwAAEPiGQAAhsQzAAAMiWcAABgSzwAAMCSeAQBgSDwDAMCQeAYAgCHxDAAAQ+IZAACGxDMAAAyJZwAAGBLPAAAwJJ4BAGBIPAMAwJB4BgCAoT2rngDnvn2H73ne2PEjB1cwEwCAnWXlGQAAhsQzAAAMiWcAABgSzwAAMCSeAQBgSDwDAMCQeAYAgCHxDAAAQ+IZAACGxDMAAAy5PDdjG12GGwDgQmLlGQAAhsQzAAAMiWcAABgSzwAAMOQLg+yI03258PiRg7s8EwCA7WPlGQAAhsQzAAAMiWcAABgSzwAAMCSeAQBgSDwDAMCQeAYAgCHxDAAAQ+IZAACGxDMAAAyJZwAAGBLPAAAwJJ4BAGBIPAMAwJB4BgCAoT2rngCczr7D92w4fvzIwV2eCQDAGivPAAAwtKWV56o6nuSbSU4meba7D1TVK5L8bpJ9SY4n+Vfd/fWtTRMAAFZvO1aef7i7r+ruA8vjw0nu7+79Se5fHgMAwDlvJw7buD7Jncv9O5PcsAO/AwAAdt1W47mT/HFVPVBVh5ax13b3E0my3L5moxdW1aGqOlpVR08+8/QWpwEAADtvq2fbeFN3P15Vr0lyX1X9xfSF3X17ktuT5JLL9/cW5wEAADtuSyvP3f34cvtUko8muTrJk1V1eZIst09tdZIAAHA2OON4rqrvqqqXnbqf5EeTPJzk7iQ3LZvdlORjW50kAACcDbZy2MZrk3y0qk69z2939x9V1WeT3FVVNyf5apK3b32aAACwemccz9395SQ/uMH4/07y1q1MCgAAzkauMAgAAEPiGQAAhrZ6qjrYFvsO37PqKQAAbMrKMwAADIlnAAAYEs8AADAkngEAYEg8AwDAkHgGAIAh8QwAAEPiGQAAhlwkhV3lYigAwLnMyjMAAAyJZwAAGBLPAAAwJJ4BAGBIPAMAwJB4BgCAIfEMAABD4hkAAIbEMwAADIlnAAAYEs8AADAkngEAYEg8AwDAkHgGAIAh8QwAAEN7Vj0B2A77Dt+z4fjxIwd3eSYAwPnMyjMAAAyJZwAAGBLPAAAwJJ4BAGBIPAMAwJB4BgCAIfEMAABD4hkAAIbEMwAADLnCIOec011NEABgp1l5BgCAIfEMAABD4hkAAIbEMwAADIlnAAAYEs8AADAkngEAYMh5nmETG51X+viRgyuYCQCwalaeAQBgSDwDAMCQwzY4r72YS3k7FAMA2IyVZwAAGBLPAAAwJJ4BAGBIPAMAwJB4BgCAIfEMAABD4hkAAIac5xkWL+ac0ADAhcnKMwAADIlnAAAYEs8AADAkngEAYEg8AwDAkHgGAIAhp6qDM3C609odP3Jwl2cCAOwmK88AADAkngEAYEg8AwDAkHgGAIAhXxiEbbTRFwlf7JcIt+M9AICdYeUZAACGxDMAAAw5bAN22E6eE9ohHgCwu6w8AwDA0I6tPFfVtUn+U5KLkvxmdx/Zqd8F56LTrUifDXOweg0AG9uReK6qi5L85yT/IsmJJJ+tqru7+ws78fvgfLcdoX02xDoAnOt26rCNq5Mc6+4vd/f/SfKRJNfv0O8CAIBdUd29/W9a9ZNJru3uf7M8fmeSH+ru96zb5lCSQ8vDH0jy8LZPhHPdq5L81aonwVnHfsFG7BdsxH7BRv5Rd7/sTF+8U8c81wZj/1+ld/ftSW5Pkqo62t0HdmgunKPsF2zEfsFG7BdsxH7BRqrq6FZev1OHbZxIcuW6x1ckeXyHfhcAAOyKnYrnzybZX1Wvq6rvSHJjkrt36HcBAMCu2JHDNrr72ap6T5L/nrVT1X2wux95gZfcvhPz4Jxnv2Aj9gs2Yr9gI/YLNrKl/WJHvjAIAADnI1cYBACAIfEMAABDK4/nqrq2qr5YVceq6vCq58PqVNXxqvp8VT146jQyVfWKqrqvqr603L581fNkZ1XVB6vqqap6eN3YhvtBrfnA8vnxUFW9cXUzZyedZr/4xar6y+Uz48Gqum7dc+9b9osvVtWPrWbW7KSqurKqPlFVj1bVI1X13mXc58UF7AX2i237vFhpPK+7jPfbkrw+yTuq6vWrnBMr98PdfdW683IeTnJ/d+9Pcv/ymPPbh5Jc+5yx0+0Hb0uyf/k5lOS2XZoju+9Def5+kSS3Lp8ZV3X3vUmy/HfkxiTfv7zm15f/3nB+eTbJz3b39yW5Jskty//2Pi8ubKfbL5Jt+rxY9cqzy3izmeuT3LncvzPJDSucC7ugu/8kydeeM3y6/eD6JB/uNZ9KcllVXb47M2U3nWa/OJ3rk3yku7/V3V9Jcixr/73hPNLdT3T355b730zyaJK98XlxQXuB/eJ0XvTnxarjeW+Sx9Y9PpEX/gdyfuskf1xVDyyXb0+S13b3E8na/yGSvGZls2OVTrcf+AzhPcuf4D+47rAu+8UFpqr2JXlDkk/H5wWL5+wXyTZ9Xqw6nje9jDcXlDd19xuz9qe1W6rqn696Qpz1fIZc2G5L8j1JrkryRJJfWcbtFxeQqvruJL+f5Ke7+69faNMNxuwX56kN9ott+7xYdTy7jDf/T3c/vtw+leSjWfuzyZOn/qy23D61uhmyQqfbD3yGXMC6+8nuPtndf5fkN/LtP7XaLy4QVXVx1gLpt7r7D5ZhnxcXuI32i+38vFh1PLuMN0mSqvquqnrZqftJfjTJw1nbH25aNrspycdWM0NW7HT7wd1J3rV8i/6aJE+f+nMt57/nHK/6E1n7zEjW9osbq+qSqnpd1r4g9pndnh87q6oqyR1JHu3uX133lM+LC9jp9ovt/LzYkctzT53BZbw5f702yUfX9vnsSfLb3f1HVfXZJHdV1c1Jvprk7SucI7ugqn4nyZuTvKqqTiT5hSRHsvF+cG+S67L2BY9nkrx71yfMrjjNfvHmqroqa39iPZ7kp5Kkux+pqruSfCFr37y/pbtPrmLe7Kg3JXlnks9X1YPL2M/H58WF7nT7xTu26/PC5bkBAGBo1YdtAADAOUM8AwDAkHgGAIAh8QwAAEPiGQAAhsQzAAAMiWcAABj6vzz20VNLJyouAAAAAElFTkSuQmCC\n",
      "text/plain": [
       "<Figure size 864x864 with 1 Axes>"
      ]
     },
     "metadata": {
      "needs_background": "light"
     },
     "output_type": "display_data"
    },
    {
     "data": {
      "image/png": "iVBORw0KGgoAAAANSUhEUgAAAs8AAAKvCAYAAACVhiLtAAAABHNCSVQICAgIfAhkiAAAAAlwSFlzAAALEgAACxIB0t1+/AAAADh0RVh0U29mdHdhcmUAbWF0cGxvdGxpYiB2ZXJzaW9uMy4xLjMsIGh0dHA6Ly9tYXRwbG90bGliLm9yZy+AADFEAAAeCElEQVR4nO3df4xl91nf8c9Tr3EIpHZ+19iWNoJtS6Bik26NpUiVSSg4dlUHiSBHVeJGrpZKjgQCtWz4B5AaaZFKDEglksFpnCqQWEAUi3UpqZMI8Ud+rINx7Jgo22QbL7Zs0SQmyCKVN0//mLPN1J71PN75cffH6yWN5t7vPffuM8rJ9Vtnzpxb3R0AAGBzf2/VAwAAwLlCPAMAwJB4BgCAIfEMAABD4hkAAIbEMwAADI3juaouqqo/r6o/Wu6/qqo+VVVfrKoPVdV3LOuXLPePLY/v3ZnRAQBgdz2fI88/k+Thdfd/Nclt3b0vydeS3LKs35Lka939fUluW7YDAIBz3iieq+rKJDck+Z3lfiV5fZLfXza5M8mblts3LvezPP6GZXsAADin7Rlu9+tJ/kOSFy33X5rk69399HL/RJIrlttXJHkkSbr76ap6ctn+r9e/YFUdTHIwSeriF/zTi1965bP+0X9yxaXjHwQAADZz3333/XV3v/xMn79pPFfVv0zyRHffV1XXnlreYNMePPbthe7bk9yeJJdcvq8vv/nXn/Wko4dv2Gw8AAAYq6r/tZXnT448vy7Jv6qq65O8IMnfz9qR6Muqas9y9PnKJI8u259IclWSE1W1J8mlSb66lSEBAOBssOk5z939zu6+srv3Jrkpyce6+18n+XiSn1w2uznJR5bbdy/3szz+se5+1pFnAAA412zlOs+/kOTnqupY1s5pvmNZvyPJS5f1n0tyaGsjAgDA2WH6B4NJku7+RJJPLLe/lOTqDbb5uyRv3obZAADgrOITBgEAYEg8AwDAkHgGAIAh8QwAAEPiGQAAhsQzAAAMiWcAABgSzwAAMCSeAQBgSDwDAMCQeAYAgCHxDAAAQ+IZAACGxDMAAAyJZwAAGBLPAAAwJJ4BAGBIPAMAwJB4BgCAIfEMAABD4hkAAIbEMwAADIlnAAAYEs8AADAkngEAYEg8AwDAkHgGAIAh8QwAAEPiGQAAhsQzAAAMiWcAABgSzwAAMCSeAQBgSDwDAMCQeAYAgCHxDAAAQ+IZAACGxDMAAAyJZwAAGBLPAAAwJJ4BAGBIPAMAwJB4BgCAIfEMAABD4hkAAIbEMwAADIlnAAAYEs8AADAkngEAYEg8AwDAkHgGAIAh8QwAAEPiGQAAhsQzAAAMiWcAABgSzwAAMCSeAQBgSDwDAMCQeAYAgCHxDAAAQ+IZAACGxDMAAAyJZwAAGBLPAAAwJJ4BAGBIPAMAwJB4BgCAIfEMAABD4hkAAIbEMwAADIlnAAAYEs8AADAkngEAYGjTeK6qF1TVp6vqL6rqoar6lWX9fVX15aq6f/nav6xXVf1mVR2rqgeq6rU7/UMAAMBu2DPY5ptJXt/df1tVFyf5s6r6b8tj/767f/8Z278xyb7l64eTvGf5DgAA57RNjzz3mr9d7l68fPVzPOXGJO9fnvfJJJdV1eVbHxUAAFZrdM5zVV1UVfcneSLJR7v7U8tD71pOzbitqi5Z1q5I8si6p59Y1p75mger6mhVHT351JNb+BEAAGB3jOK5u0929/4kVya5uqp+MMk7k/zjJP8syUuS/MKyeW30Ehu85u3dfaC7D1z0wkvPaHgAANhNz+tqG9399SSfSHJddz+2nJrxzST/JcnVy2Ynkly17mlXJnl0G2YFAICVmlxt4+VVddly+zuT/GiSvzx1HnNVVZI3JXlwecrdSd62XHXjmiRPdvdjOzI9AADsosnVNi5PcmdVXZS12L6ru/+oqj5WVS/P2mka9yf5d8v29yS5PsmxJE8lefv2jw0AALtv03ju7geSvGaD9defZvtOcuvWRwMAgLOLTxgEAIAh8QwAAEPiGQAAhsQzAAAMiWcAABgSzwAAMCSeAQBgSDwDAMCQeAYAgCHxDAAAQ+IZAACGxDMAAAyJZwAAGBLPAAAwJJ4BAGBIPAMAwJB4BgCAIfEMAABD4hkAAIbEMwAADIlnAAAYEs8AADAkngEAYEg8AwDAkHgGAIAh8QwAAEPiGQAAhsQzAAAMiWcAABgSzwAAMCSeAQBgSDwDAMCQeAYAgCHxDAAAQ+IZAACGxDMAAAyJZwAAGBLPAAAwJJ4BAGBIPAMAwJB4BgCAIfEMAABD4hkAAIbEMwAADIlnAAAYEs8AADAkngEAYEg8AwDAkHgGAIAh8QwAAEPiGQAAhsQzAAAMiWcAABgSzwAAMCSeAQBgSDwDAMCQeAYAgCHxDAAAQ+IZAACGxDMAAAyJZwAAGBLPAAAwJJ4BAGBIPAMAwJB4BgCAIfEMAABD4hkAAIbEMwAADIlnAAAYEs8AADAkngEAYEg8AwDA0KbxXFUvqKpPV9VfVNVDVfUry/qrqupTVfXFqvpQVX3Hsn7Jcv/Y8vjenf0RAABgd0yOPH8zyeu7+4eS7E9yXVVdk+RXk9zW3fuSfC3JLcv2tyT5Wnd/X5Lblu0AAOCct2k895q/Xe5evHx1ktcn+f1l/c4kb1pu37jcz/L4G6qqtm1iAABYkdE5z1V1UVXdn+SJJB9N8j+TfL27n142OZHkiuX2FUkeSZLl8SeTvHQ7hwYAgFUYxXN3n+zu/UmuTHJ1ku/faLPl+0ZHmfuZC1V1sKqOVtXRk089OZ0XAABW5nldbaO7v57kE0muSXJZVe1ZHroyyaPL7RNJrkqS5fFLk3x1g9e6vbsPdPeBi1546ZlNDwAAu2hytY2XV9Vly+3vTPKjSR5O8vEkP7lsdnOSjyy3717uZ3n8Y939rCPPAABwrtmz+Sa5PMmdVXVR1mL7ru7+o6r6fJIPVtV/TPLnSe5Ytr8jyX+tqmNZO+J80w7MDQAAu27TeO7uB5K8ZoP1L2Xt/Odnrv9dkjdvy3QAAHAW8QmDAAAwJJ4BAGBIPAMAwJB4BgCAIfEMAABD4hkAAIbEMwAADIlnAAAYEs8AADAkngEAYEg8AwDAkHgGAIAh8QwAAEPiGQAAhsQzAAAMiWcAABgSzwAAMCSeAQBgSDwDAMCQeAYAgCHxDAAAQ+IZAACGxDMAAAyJZwAAGBLPAAAwJJ4BAGBIPAMAwJB4BgCAIfEMAABD4hkAAIbEMwAADIlnAAAYEs8AADAkngEAYEg8AwDAkHgGAIAh8QwAAEPiGQAAhsQzAAAMiWcAABgSzwAAMCSeAQBgSDwDAMCQeAYAgCHxDAAAQ+IZAACGxDMAAAyJZwAAGBLPAAAwJJ4BAGBIPAMAwJB4BgCAIfEMAABD4hkAAIbEMwAADO1Z9QDPZe+hI89aO374hhVMAgAAjjwDAMCYeAYAgCHxDAAAQ+IZAACGxDMAAAyJZwAAGBLPAAAwJJ4BAGBIPAMAwJB4BgCAIfEMAABD4hkAAIbEMwAADIlnAAAYEs8AADAkngEAYEg8AwDA0KbxXFVXVdXHq+rhqnqoqn5mWf/lqvqrqrp/+bp+3XPeWVXHquoLVfXjO/kDAADAbtkz2ObpJD/f3Z+tqhclua+qPro8dlt3/6f1G1fVq5PclOQHknxPkv9RVf+wu09u5+AAALDbNj3y3N2Pdfdnl9vfSPJwkiue4yk3Jvlgd3+zu7+c5FiSq7djWAAAWKXndc5zVe1N8pokn1qW3lFVD1TVe6vqxcvaFUkeWfe0E9kgtqvqYFUdraqjJ5968nkPDgAAu20cz1X13Un+IMnPdvffJHlPku9Nsj/JY0l+7dSmGzy9n7XQfXt3H+juAxe98NLnPTgAAOy2UTxX1cVZC+cPdPcfJkl3P97dJ7v7W0l+O98+NeNEkqvWPf3KJI9u38gAALAak6ttVJI7kjzc3e9et375us1+IsmDy+27k9xUVZdU1auS7Evy6e0bGQAAVmNytY3XJXlrks9V1f3L2i8meUtV7c/aKRnHk/x0knT3Q1V1V5LPZ+1KHbe60gYAAOeDTeO5u/8sG5/HfM9zPOddSd61hbkAAOCs4xMGAQBgSDwDAMCQeAYAgCHxDAAAQ+IZAACGxDMAAAyJZwAAGBLPAAAwJJ4BAGBIPAMAwJB4BgCAIfEMAABD4hkAAIbEMwAADIlnAAAYEs8AADAkngEAYEg8AwDAkHgGAIAh8QwAAEPiGQAAhsQzAAAMiWcAABgSzwAAMCSeAQBgSDwDAMCQeAYAgKE9qx7g+dp76MiG68cP37DLk+yM8/3nAwA4lznyDAAAQ+IZAACGxDMAAAyJZwAAGBLPAAAwJJ4BAGBIPAMAwJB4BgCAIfEMAABD4hkAAIbEMwAADIlnAAAYEs8AADAkngEAYEg8AwDAkHgGAIAh8QwAAEPiGQAAhsQzAAAMiWcAABgSzwAAMCSeAQBgSDwDAMCQeAYAgCHxDAAAQ+IZAACGxDMAAAyJZwAAGBLPAAAwJJ4BAGBIPAMAwJB4BgCAIfEMAABD4hkAAIbEMwAADIlnAAAYEs8AADAkngEAYEg8AwDAkHgGAIAh8QwAAEPiGQAAhsQzAAAMiWcAABjas9kGVXVVkvcn+QdJvpXk9u7+jap6SZIPJdmb5HiSn+rur1VVJfmNJNcneSrJv+nuz+7M+GeXvYeObLh+/PANuzwJAAA7YXLk+ekkP9/d35/kmiS3VtWrkxxKcm9370ty73I/Sd6YZN/ydTDJe7Z9agAAWIFN47m7Hzt15Li7v5Hk4SRXJLkxyZ3LZncmedNy+8Yk7+81n0xyWVVdvu2TAwDALnte5zxX1d4kr0nyqSSv7O7HkrXATvKKZbMrkjyy7mknljUAADinjeO5qr47yR8k+dnu/pvn2nSDtd7g9Q5W1dGqOnryqSenYwAAwMqM4rmqLs5aOH+gu/9wWX781OkYy/cnlvUTSa5a9/Qrkzz6zNfs7tu7+0B3H7johZee6fwAALBrNo3n5eoZdyR5uLvfve6hu5PcvNy+OclH1q2/rdZck+TJU6d3AADAuWzTS9UleV2Styb5XFXdv6z9YpLDSe6qqluSfCXJm5fH7snaZeqOZe1SdW/f1okBAGBFNo3n7v6zbHwec5K8YYPtO8mtW5wLAADOOj5hEAAAhsQzAAAMiWcAABgSzwAAMCSeAQBgSDwDAMCQeAYAgCHxDAAAQ+IZAACGxDMAAAyJZwAAGBLPAAAwJJ4BAGBIPAMAwJB4BgCAIfEMAABD4hkAAIbEMwAADIlnAAAYEs8AADAkngEAYEg8AwDAkHgGAIAh8QwAAEPiGQAAhsQzAAAMiWcAABgSzwAAMCSeAQBgSDwDAMCQeAYAgCHxDAAAQ+IZAACGxDMAAAyJZwAAGBLPAAAwJJ4BAGBIPAMAwJB4BgCAoT2rHmC77D10ZMP144dv2OVJAAA4X5038XwuOl3wAwBwdnLaBgAADIlnAAAYEs8AADAkngEAYEg8AwDAkHgGAIAhl6rbBS5JBwBwfhDPZ0gQAwBceJy2AQAAQ+IZAACGxDMAAAyJZwAAGBLPAAAwJJ4BAGBIPAMAwJB4BgCAofP+Q1I2+jCT44dvWMEkAACc6xx5BgCAIfEMAABD4hkAAIbEMwAADIlnAAAYEs8AADAkngEAYEg8AwDAkHgGAIAh8QwAAEPiGQAAhsQzAAAMiWcAABgSzwAAMCSeAQBgaNN4rqr3VtUTVfXgurVfrqq/qqr7l6/r1z32zqo6VlVfqKof36nBAQBgt02OPL8vyXUbrN/W3fuXr3uSpKpeneSmJD+wPOe3quqi7RoWAABWadN47u4/TfLV4evdmOSD3f3N7v5ykmNJrt7CfAAAcNbYyjnP76iqB5bTOl68rF2R5JF125xY1p6lqg5W1dGqOnryqSe3MAYAAOyOM43n9yT53iT7kzyW5NeW9dpg297oBbr79u4+0N0HLnrhpWc4BgAA7J4ziufufry7T3b3t5L8dr59asaJJFet2/TKJI9ubUQAADg77DmTJ1XV5d392HL3J5KcuhLH3Ul+t6reneR7kuxL8uktT7nN9h46suH68cM3jLcFAODCs2k8V9XvJbk2ycuq6kSSX0pybVXtz9opGceT/HSSdPdDVXVXks8neTrJrd19cmdGBwCA3bVpPHf3WzZYvuM5tn9XkndtZSgAADgb+YRBAAAYEs8AADAkngEAYEg8AwDAkHgGAIAh8QwAAEPiGQAAhsQzAAAMiWcAABgSzwAAMCSeAQBgSDwDAMCQeAYAgCHxDAAAQ+IZAACGxDMAAAyJZwAAGBLPAAAwJJ4BAGBIPAMAwJB4BgCAIfEMAABDe1Y9wNlk76Ejqx7heTndvMcP37DLkwAAXBgceQYAgCHxDAAAQ+IZAACGxDMAAAyJZwAAGBLPAAAwJJ4BAGBIPAMAwJB4BgCAIfEMAABD4hkAAIbEMwAADIlnAAAYEs8AADC0Z9UDMLP30JFVjwAAcMFz5BkAAIbEMwAADIlnAAAYEs8AADAkngEAYEg8AwDAkHgGAIAh8QwAAEPiGQAAhsQzAAAMiWcAABgSzwAAMCSeAQBgSDwDAMCQeAYAgCHxDAAAQ+IZAACGxDMAAAztWfUA7I69h45suH788A27PAkAwLnLkWcAABgSzwAAMCSeAQBgSDwDAMCQeAYAgCHxDAAAQ+IZAACGxDMAAAyJZwAAGBLPAAAwJJ4BAGBIPAMAwJB4BgCAIfEMAABD4hkAAIY2jeeqem9VPVFVD65be0lVfbSqvrh8f/GyXlX1m1V1rKoeqKrX7uTwAACwmyZHnt+X5LpnrB1Kcm9370ty73I/Sd6YZN/ydTDJe7ZnTAAAWL1N47m7/zTJV5+xfGOSO5fbdyZ507r19/eaTya5rKou365hAQBglc70nOdXdvdjSbJ8f8WyfkWSR9Ztd2JZAwCAc952/8FgbbDWG25YdbCqjlbV0ZNPPbnNYwAAwPY703h+/NTpGMv3J5b1E0muWrfdlUke3egFuvv27j7Q3QcueuGlZzgGAADsnjON57uT3LzcvjnJR9atv2256sY1SZ48dXoHAACc6/ZstkFV/V6Sa5O8rKpOJPmlJIeT3FVVtyT5SpI3L5vfk+T6JMeSPJXk7TswMwAArMSm8dzdbznNQ2/YYNtOcutWhwIAgLORTxgEAIAh8QwAAEPiGQAAhsQzAAAMiWcAABgSzwAAMCSeAQBgSDwDAMDQph+Swrln76Ejqx4BAOC85MgzAAAMiWcAABgSzwAAMCSeAQBgSDwDAMCQeAYAgCHxDAAAQ+IZAACGxDMAAAyJZwAAGBLPAAAwJJ4BAGBIPAMAwJB4BgCAIfEMAABD4hkAAIbEMwAADO1Z9QCcnfYeOvKsteOHb1jBJAAAZw9HngEAYEg8AwDAkHgGAIAh8QwAAEPiGQAAhlxtg7GNrsCRuAoHAHDhcOQZAACGHHlmVzl6DQCcy8TzBe50MQsAwLM5bQMAAIbEMwAADIlnAAAYEs8AADAkngEAYEg8AwDAkHgGAIAh8QwAAEPiGQAAhsQzAAAMiWcAABgSzwAAMCSeAQBgSDwDAMDQnlUPwLlv76Ejz1o7fviGFUwCALCzHHkGAIAh8QwAAEPiGQAAhsQzAAAMiWcAABgSzwAAMORSdZy1NroEXuIyeADA6jjyDAAAQ+IZAACGxDMAAAyJZwAAGBLPAAAwJJ4BAGBIPAMAwJB4BgCAIfEMAABD4hkAAIbEMwAADIlnAAAYEs8AADAkngEAYEg8AwDA0J6tPLmqjif5RpKTSZ7u7gNV9ZIkH0qyN8nxJD/V3V/b2pgAALB623Hk+Ue6e393H1juH0pyb3fvS3Lvch8AAM55WzryfBo3Jrl2uX1nkk8k+YUd+Hc4i+09dGTVIwAAbLutHnnuJH9SVfdV1cFl7ZXd/ViSLN9fsdETq+pgVR2tqqMnn3pyi2MAAMDO2+qR59d196NV9YokH62qv5w+sbtvT3J7klxy+b7e4hwAALDjtnTkubsfXb4/keTDSa5O8nhVXZ4ky/cntjokAACcDc44nqvqu6rqRaduJ/mxJA8muTvJzctmNyf5yFaHBACAs8FWTtt4ZZIPV9Wp1/nd7v7jqvpMkruq6pYkX0ny5q2PCQAAq3fG8dzdX0ryQxus/+8kb9jKUAAAcDbyCYMAADAkngEAYEg8AwDAkHgGAIAh8QwAAEPiGQAAhsQzAAAMiWcAABgSzwAAMCSeAQBgSDwDAMDQnlUPAEmy99CRVY8AALApR54BAGBIPAMAwJB4BgCAIfEMAABD4hkAAIbEMwAADIlnAAAYEs8AADAkngEAYEg8AwDAkHgGAIAh8QwAAEN7Vj0APF97Dx151trxwzesYBIA4ELjyDMAAAyJZwAAGBLPAAAwJJ4BAGDIHwxywdnoDw4Tf3QIAGzOkWcAABgSzwAAMCSeAQBgSDwDAMCQeAYAgCHxDAAAQ+IZAACGXOeZ84JrNwMAu8GRZwAAGBLPAAAw5LQNzmunO50DAOBMOPIMAABD4hkAAIbEMwAADIlnAAAYEs8AADAkngEAYEg8AwDAkHgGAIAh8QwAAEPiGQAAhsQzAAAMiWcAABgSzwAAMCSeAQBgSDwDAMCQeAYAgCHxDAAAQ+IZAACGxDMAAAyJZwAAGNqz6gHgbLf30JFnrR0/fMOWtwUAzj2OPAMAwJAjz7DY6KgxAMB64hnOgNAGgAuT0zYAAGBIPAMAwJB4BgCAIec8ww473fnRLmEHAOce8Qwr8nyiWoADwNnBaRsAADAkngEAYEg8AwDAUHX3zrxw1XVJfiPJRUl+p7sPn27bSy7f15ff/Os7MgdcaJwHDQCnV1X3dfeBM33+jvzBYFVdlOQ/J/kXSU4k+UxV3d3dn9+Jfw/Y3EZ/dCi0AeD52anTNq5Ocqy7v9Td/yfJB5PcuEP/FgAA7IodOW2jqn4yyXXd/W+X+29N8sPd/Y512xxMcnC5+4NJHtz2QTjXvSzJX696CM469gs2Yr9gI/YLNvKPuvtFZ/rknbrOc22w9v9VenffnuT2JKmqo1s594Tzk/2Cjdgv2Ij9go3YL9hIVR3dyvN36rSNE0muWnf/yiSP7tC/BQAAu2Kn4vkzSfZV1auq6juS3JTk7h36twAAYFfsyGkb3f10Vb0jyX/P2qXq3tvdDz3HU27fiTk459kv2Ij9go3YL9iI/YKNbGm/2LHrPAMAwPnGJwwCAMCQeAYAgKGVx3NVXVdVX6iqY1V1aNXzsDpVdbyqPldV95+6jExVvaSqPlpVX1y+v3jVc7Kzquq9VfVEVT24bm3D/aDW/Oby/vFAVb12dZOzk06zX/xyVf3V8p5xf1Vdv+6xdy77xReq6sdXMzU7qaquqqqPV9XDVfVQVf3Msu794gL2HPvFtr1frDSe132M9xuTvDrJW6rq1auciZX7ke7ev+66nIeS3Nvd+5Lcu9zn/Pa+JNc9Y+10+8Ebk+xbvg4mec8uzcjue1+evV8kyW3Le8b+7r4nSZb/jtyU5AeW5/zW8t8bzi9PJ/n57v7+JNckuXX53977xYXtdPtFsk3vF6s+8uxjvNnMjUnuXG7fmeRNK5yFXdDdf5rkq89YPt1+cGOS9/eaTya5rKou351J2U2n2S9O58YkH+zub3b3l5Mcy9p/bziPdPdj3f3Z5fY3kjyc5Ip4v7igPcd+cTrP+/1i1fF8RZJH1t0/kef+ATm/dZI/qar7lo9vT5JXdvdjydr/IZK8YmXTsUqn2w+8h/CO5Vfw7113Wpf94gJTVXuTvCbJp+L9gsUz9otkm94vVh3Pm36MNxeU13X3a7P2q7Vbq+qfr3ogznreQy5s70nyvUn2J3ksya8t6/aLC0hVfXeSP0jys939N8+16QZr9ovz1Ab7xba9X6w6nn2MN/9Pdz+6fH8iyYez9muTx0/9Wm35/sTqJmSFTrcfeA+5gHX34919sru/leS38+1ftdovLhBVdXHWAukD3f2Hy7L3iwvcRvvFdr5frDqefYw3SZKq+q6qetGp20l+LMmDWdsfbl42uznJR1YzISt2uv3g7iRvW/6K/pokT576dS3nv2ecr/oTWXvPSNb2i5uq6pKqelXW/kDs07s9HzurqirJHUke7u53r3vI+8UF7HT7xXa+X+zIx3NPncHHeHP+emWSD6/t89mT5He7+4+r6jNJ7qqqW5J8JcmbVzgju6Cqfi/JtUleVlUnkvxSksPZeD+4J8n1WfsDj6eSvH3XB2ZXnGa/uLaq9mftV6zHk/x0knT3Q1V1V5LPZ+0v72/t7pOrmJsd9bokb03yuaq6f1n7xXi/uNCdbr94y3a9X/h4bgAAGFr1aRsAAHDOEM8AADAkngEAYEg8AwDAkHgGAIAh8QwAAEPiGQAAhv4vfALlc+gcI/AAAAAASUVORK5CYII=\n",
      "text/plain": [
       "<Figure size 864x864 with 1 Axes>"
      ]
     },
     "metadata": {
      "needs_background": "light"
     },
     "output_type": "display_data"
    },
    {
     "data": {
      "image/png": "iVBORw0KGgoAAAANSUhEUgAAAs8AAAKvCAYAAACVhiLtAAAABHNCSVQICAgIfAhkiAAAAAlwSFlzAAALEgAACxIB0t1+/AAAADh0RVh0U29mdHdhcmUAbWF0cGxvdGxpYiB2ZXJzaW9uMy4xLjMsIGh0dHA6Ly9tYXRwbG90bGliLm9yZy+AADFEAAAeC0lEQVR4nO3dfawl913f8c+3u8YhEOw8a2tb2gi2LYEKJ90aS5GqkFBwvKgOEkGOqsSNXC2VHCkI1GbDP4DUSItUMCCVSAancSogsYAoFk4pqZMIITUP62ASOybKNtnGiy1blMQEWaTy8u0fd1wu9lnv13sfzj68XtLVPfM7M+f+rjw++9bcOTPV3QEAAM7sH6x7AgAAcL4QzwAAMCSeAQBgSDwDAMCQeAYAgCHxDAAAQ+N4rqo9VfUnVfX7y/IrqupTVfWlqvpgVX3LMn7psnx8eX7/zkwdAAB213M58vyOJA9uWv6FJLd294EkX0ty8zJ+c5Kvdfd3Jbl1WQ8AAM57o3iuqiuTHEryG8tyJXldkt9ZVrkjyRuXxzcsy1mef/2yPgAAnNf2Dtf75ST/IckLluUXJ/l6dz+5LJ9McsXy+IokDyVJdz9ZVY8v6//F5hesqsNJDidJXfK8f3bJi698xg/9p1dcNv5FAADgTO69996/6O6Xnu32Z4znqvqRJI91971V9dqnhles2oPn/m6g+7YktyXJpfsO9L6bfvkZGx07euhM0wMAgLGq+t9b2X5y5Pk1Sf5VVV2f5HlJviMbR6Ivr6q9y9HnK5M8vKx/MslVSU5W1d4klyX5y61MEgAAzgVnPOe5u9/V3Vd29/4kNyb5WHf/6yQfT/Jjy2o3Jfnw8viuZTnL8x/r7mcceQYAgPPNVq7z/M4kP1VVx7NxTvPty/jtSV68jP9UkiNbmyIAAJwbph8YTJJ09yeSfGJ5/OUk16xY52+SvGkb5gYAAOcUdxgEAIAh8QwAAEPiGQAAhsQzAAAMiWcAABgSzwAAMCSeAQBgSDwDAMCQeAYAgCHxDAAAQ+IZAACGxDMAAAyJZwAAGBLPAAAwJJ4BAGBIPAMAwJB4BgCAIfEMAABD4hkAAIbEMwAADIlnAAAYEs8AADAkngEAYEg8AwDAkHgGAIAh8QwAAEPiGQAAhsQzAAAMiWcAABgSzwAAMCSeAQBgSDwDAMCQeAYAgCHxDAAAQ+IZAACGxDMAAAyJZwAAGBLPAAAwJJ4BAGBIPAMAwJB4BgCAIfEMAABD4hkAAIbEMwAADIlnAAAYEs8AADAkngEAYEg8AwDAkHgGAIAh8QwAAEPiGQAAhsQzAAAMiWcAABgSzwAAMCSeAQBgSDwDAMCQeAYAgCHxDAAAQ+IZAACGxDMAAAyJZwAAGBLPAAAwJJ4BAGBIPAMAwJB4BgCAIfEMAABD4hkAAIbEMwAADIlnAAAYEs8AADAkngEAYEg8AwDAkHgGAIChM8ZzVT2vqj5dVX9aVQ9U1c8v4++rqq9U1X3L19XLeFXVr1bV8ar6XFW9eqd/CQAA2A17B+t8M8nruvuvq+qSJH9cVf9tee7fd/fvPG39NyQ5sHx9f5L3LN8BAOC8dsYjz73hr5fFS5avfpZNbkjy/mW7Tya5vKr2bX2qAACwXqNznqtqT1Xdl+SxJB/t7k8tT717OTXj1qq6dBm7IslDmzY/uYw9/TUPV9Wxqjp26onHt/ArAADA7hjFc3ef6u6rk1yZ5Jqq+t4k70ryT5L88yQvSvLOZfVa9RIrXvO27j7Y3Qf3PP+ys5o8AADspud0tY3u/nqSTyS5rrsfWU7N+GaS/5LkmmW1k0mu2rTZlUke3oa5AgDAWk2utvHSqrp8efytSX4wyZ89dR5zVVWSNya5f9nkriRvXa66cW2Sx7v7kR2ZPQAA7KLJ1Tb2JbmjqvZkI7bv7O7fr6qPVdVLs3Gaxn1J/t2y/keSXJ/keJInkrxt+6cNAAC774zx3N2fS/KqFeOvO836neSWrU8NAADOLe4wCAAAQ+IZAACGxDMAAAyJZwAAGBLPAAAwJJ4BAGBIPAMAwJB4BgCAIfEMAABD4hkAAIbEMwAADIlnAAAYEs8AADAkngEAYEg8AwDAkHgGAIAh8QwAAEPiGQAAhsQzAAAMiWcAABgSzwAAMCSeAQBgSDwDAMCQeAYAgCHxDAAAQ+IZAACGxDMAAAyJZwAAGBLPAAAwJJ4BAGBIPAMAwJB4BgCAIfEMAABD4hkAAIbEMwAADIlnAAAYEs8AADAkngEAYEg8AwDAkHgGAIAh8QwAAEPiGQAAhsQzAAAMiWcAABgSzwAAMCSeAQBgSDwDAMCQeAYAgCHxDAAAQ+IZAACGxDMAAAyJZwAAGBLPAAAwJJ4BAGBIPAMAwJB4BgCAIfEMAABD4hkAAIbEMwAADIlnAAAYEs8AADAkngEAYEg8AwDAkHgGAIAh8QwAAEPiGQAAhsQzAAAMiWcAABgSzwAAMCSeAQBgSDwDAMCQeAYAgKEzxnNVPa+qPl1Vf1pVD1TVzy/jr6iqT1XVl6rqg1X1Lcv4pcvy8eX5/Tv7KwAAwO6YHHn+ZpLXdff3Jbk6yXVVdW2SX0hya3cfSPK1JDcv69+c5Gvd/V1Jbl3WAwCA894Z47k3/PWyeMny1Ulel+R3lvE7krxxeXzDspzl+ddXVW3bjAEAYE1G5zxX1Z6qui/JY0k+muR/Jfl6dz+5rHIyyRXL4yuSPJQky/OPJ3nxdk4aAADWYRTP3X2qu69OcmWSa5J896rVlu+rjjL30weq6nBVHauqY6eeeHw6XwAAWJvndLWN7v56kk8kuTbJ5VW1d3nqyiQPL49PJrkqSZbnL0vylyte67buPtjdB/c8/7Kzmz0AAOyiydU2XlpVly+PvzXJDyZ5MMnHk/zYstpNST68PL5rWc7y/Me6+xlHngEA4Hyz98yrZF+SO6pqTzZi+87u/v2q+kKSD1TVf0zyJ0luX9a/Pcl/rarj2TjifOMOzBsAAHbdGeO5uz+X5FUrxr+cjfOfnz7+N0netC2zAwCAc4g7DAIAwJB4BgCAIfEMAABD4hkAAIbEMwAADIlnAAAYEs8AADAkngEAYEg8AwDAkHgGAIAh8QwAAEPiGQAAhsQzAAAMiWcAABgSzwAAMCSeAQBgSDwDAMCQeAYAgCHxDAAAQ+IZAACGxDMAAAyJZwAAGBLPAAAwJJ4BAGBo77onwN+3/8jdK8dPHD20yzMBAODpHHkGAIAh8QwAAEPiGQAAhsQzAAAMiWcAABgSzwAAMCSeAQBgSDwDAMCQeAYAgCHxDAAAQ+IZAACGxDMAAAyJZwAAGBLPAAAwJJ4BAGBIPAMAwJB4BgCAob3rnsCz2X/k7meMnTh6aA0zAQAAR54BAGBMPAMAwJB4BgCAIfEMAABD4hkAAIbEMwAADIlnAAAYEs8AADAkngEAYEg8AwDAkHgGAIAh8QwAAEPiGQAAhsQzAAAMiWcAABgSzwAAMCSeAQBgSDwDAMCQeAYAgCHxDAAAQ+IZAACGxDMAAAyJZwAAGBLPAAAwJJ4BAGBIPAMAwJB4BgCAIfEMAABD4hkAAIbEMwAADJ0xnqvqqqr6eFU9WFUPVNU7lvGfq6o/r6r7lq/rN23zrqo6XlVfrKof3slfAAAAdsvewTpPJvnp7v5sVb0gyb1V9dHluVu7+z9tXrmqXpnkxiTfk+QfJvkfVfWPuvvUdk4cAAB22xmPPHf3I9392eXxN5I8mOSKZ9nkhiQf6O5vdvdXkhxPcs12TBYAANbpOZ3zXFX7k7wqyaeWobdX1eeq6r1V9cJl7IokD23a7GRWxHZVHa6qY1V17NQTjz/niQMAwG4bx3NVfXuS303yk939V0nek+Q7k1yd5JEkv/jUqis272cMdN/W3Qe7++Ce51/2nCcOAAC7bRTPVXVJNsL5N7v795Kkux/t7lPd/bdJfj1/d2rGySRXbdr8yiQPb9+UAQBgPSZX26gktyd5sLt/adP4vk2r/WiS+5fHdyW5saourapXJDmQ5NPbN2UAAFiPydU2XpPkLUk+X1X3LWM/k+TNVXV1Nk7JOJHkJ5Kkux+oqjuTfCEbV+q4xZU2AAC4EJwxnrv7j7P6POaPPMs2707y7i3MCwAAzjnuMAgAAEPiGQAAhsQzAAAMiWcAABgSzwAAMCSeAQBgSDwDAMCQeAYAgCHxDAAAQ+IZAACGxDMAAAyJZwAAGBLPAAAwJJ4BAGBIPAMAwJB4BgCAIfEMAABD4hkAAIbEMwAADIlnAAAYEs8AADAkngEAYEg8AwDAkHgGAIAh8QwAAEPiGQAAhsQzAAAMiWcAABgSzwAAMCSeAQBgSDwDAMCQeAYAgCHxDAAAQ+IZAACGxDMAAAyJZwAAGBLPAAAwJJ4BAGBIPAMAwJB4BgCAIfEMAABD4hkAAIbEMwAADIlnAAAYEs8AADAkngEAYEg8AwDAkHgGAIAh8QwAAEPiGQAAhsQzAAAMiWcAABgSzwAAMCSeAQBgSDwDAMCQeAYAgCHxDAAAQ+IZAACGxDMAAAyJZwAAGBLPAAAwJJ4BAGBIPAMAwNDedU/gYrD/yN3rngIAANvAkWcAABgSzwAAMCSeAQBgSDwDAMCQeAYAgCHxDAAAQ+IZAACGxDMAAAydMZ6r6qqq+nhVPVhVD1TVO5bxF1XVR6vqS8v3Fy7jVVW/WlXHq+pzVfXqnf4lAABgN0yOPD+Z5Ke7+7uTXJvklqp6ZZIjSe7p7gNJ7lmWk+QNSQ4sX4eTvGfbZw0AAGtwxnju7ke6+7PL428keTDJFUluSHLHstodSd64PL4hyft7wyeTXF5V+7Z95gAAsMue0znPVbU/yauSfCrJy7v7kWQjsJO8bFntiiQPbdrs5DIGAADntb3TFavq25P8bpKf7O6/qqrTrrpirFe83uFsnNaRPd/x0uk0sv/I3SvHTxw9NH4NAAA4G6Mjz1V1STbC+Te7+/eW4UefOh1j+f7YMn4yyVWbNr8yycNPf83uvq27D3b3wT3Pv+xs5w8AALtmcrWNSnJ7kge7+5c2PXVXkpuWxzcl+fCm8bcuV924NsnjT53eAQAA57PJaRuvSfKWJJ+vqvuWsZ9JcjTJnVV1c5KvJnnT8txHklyf5HiSJ5K8bVtnDAAAa3LGeO7uP87q85iT5PUr1u8kt2xxXgAAcM5xh0EAABgSzwAAMCSeAQBgSDwDAMCQeAYAgCHxDAAAQ+IZAACGxDMAAAyJZwAAGBLPAAAwJJ4BAGBo77oncL7af+TuZ4ydOHpoDTMBAGC3OPIMAABD4hkAAIbEMwAADIlnAAAYEs8AADAkngEAYEg8AwDAkHgGAIAh8QwAAEPiGQAAhsQzAAAMiWcAABgSzwAAMCSeAQBgSDwDAMCQeAYAgCHxDAAAQ+IZAACGxDMAAAyJZwAAGBLPAAAwJJ4BAGBIPAMAwJB4BgCAIfEMAABD4hkAAIbEMwAADIlnAAAYEs8AADAkngEAYEg8AwDAkHgGAIAh8QwAAEN71z2Bc93+I3evewoAAJwjHHkGAIAh8QwAAENO2zhPrDp95MTRQ2uYCQDAxcuRZwAAGBLPAAAwJJ4BAGBIPAMAwJB4BgCAIfEMAABD4hkAAIbEMwAADIlnAAAYumDuMLjqDnyJu/ABALB9HHkGAIAh8QwAAEPiGQAAhsQzAAAMiWcAABgSzwAAMCSeAQBgSDwDAMCQeAYAgCHxDAAAQ+IZAACGxDMAAAztXfcE1mH/kbtXjp84emhHXhcAgAuDI88AADB0xniuqvdW1WNVdf+msZ+rqj+vqvuWr+s3PfeuqjpeVV+sqh/eqYkDAMBumxx5fl+S61aM39rdVy9fH0mSqnplkhuTfM+yza9V1Z7tmiwAAKzTGc957u4/qqr9w9e7IckHuvubSb5SVceTXJPkf571DLfIecgAAGyXrZzz/Paq+txyWscLl7Erkjy0aZ2Ty9gzVNXhqjpWVcdOPfH4FqYBAAC742zj+T1JvjPJ1UkeSfKLy3itWLdXvUB339bdB7v74J7nX3aW0wAAgN1zVvHc3Y9296nu/tskv56NUzOSjSPNV21a9cokD29tigAAcG44q3iuqn2bFn80yVNX4rgryY1VdWlVvSLJgSSf3toUAQDg3HDGDwxW1W8neW2Sl1TVySQ/m+S1VXV1Nk7JOJHkJ5Kkux+oqjuTfCHJk0lu6e5TOzN1AADYXZOrbbx5xfDtz7L+u5O8eyuTAgCAc5E7DAIAwJB4BgCAIfEMAABD4hkAAIbO+IHBi4lbeQMA8GwceQYAgCHxDAAAQ+IZAACGxDMAAAyJZwAAGBLPAAAwJJ4BAGBIPAMAwJB4BgCAIfEMAABD4hkAAIbEMwAADIlnAAAYEs8AADAkngEAYEg8AwDAkHgGAIAh8QwAAEPiGQAAhsQzAAAM7V33BDh7+4/cvXL8xNFDuzwTAICLgyPPAAAwJJ4BAGBIPAMAwJB4BgCAIfEMAABD4hkAAIbEMwAADIlnAAAYEs8AADAkngEAYEg8AwDAkHgGAIChveueANtv/5G7nzF24uihNcwEAODC4sgzAAAMiWcAABgSzwAAMCSeAQBgSDwDAMCQeAYAgCHxDAAAQ+IZAACGxDMAAAyJZwAAGBLPAAAwJJ4BAGBIPAMAwJB4BgCAIfEMAABD4hkAAIbEMwAADIlnAAAYEs8AADAkngEAYEg8AwDAkHgGAIAh8QwAAEPiGQAAhsQzAAAMiWcAABgSzwAAMCSeAQBgSDwDAMCQeAYAgCHxDAAAQ+IZAACGxDMAAAztPdMKVfXeJD+S5LHu/t5l7EVJPphkf5ITSX68u79WVZXkV5Jcn+SJJP+muz+7M1Pnudh/5O6V4yeOHtrlmQAAnL8mR57fl+S6p40dSXJPdx9Ics+ynCRvSHJg+Tqc5D3bM00AAFi/Mx557u4/qqr9Txu+Iclrl8d3JPlEkncu4+/v7k7yyaq6vKr2dfcj2zVhtpcj0gAAc2d7zvPLnwri5fvLlvErkjy0ab2TyxgAAJz3tvsDg7VirFeuWHW4qo5V1bFTTzy+zdMAAIDtd7bx/GhV7UuS5ftjy/jJJFdtWu/KJA+veoHuvq27D3b3wT3Pv+wspwEAALvnbOP5riQ3LY9vSvLhTeNvrQ3XJnnc+c4AAFwoJpeq++1sfDjwJVV1MsnPJjma5M6qujnJV5O8aVn9I9m4TN3xbFyq7m07MGcAAFiLydU23nyap16/Yt1OcstWJwUAAOcidxgEAIAh8QwAAEPiGQAAhsQzAAAMiWcAABgSzwAAMCSeAQBgSDwDAMCQeAYAgCHxDAAAQ+IZAACGxDMAAAyJZwAAGBLPAAAwJJ4BAGBIPAMAwJB4BgCAIfEMAABD4hkAAIbEMwAADIlnAAAYEs8AADAkngEAYEg8AwDA0N51T4Bz0/4jdz9j7MTRQ2uYCQDAucORZwAAGBLPAAAwJJ4BAGBIPAMAwJB4BgCAIfEMAABD4hkAAIbEMwAADIlnAAAYEs8AADDk9tyMrbpld+K23QDAxcORZwAAGBLPAAAwJJ4BAGBIPAMAwJB4BgCAIfEMAABD4hkAAIbEMwAADIlnAAAYEs8AADAkngEAYEg8AwDAkHgGAIAh8QwAAEPiGQAAhsQzAAAMiWcAABgSzwAAMCSeAQBgSDwDAMCQeAYAgCHxDAAAQ+IZAACGxDMAAAyJZwAAGBLPAAAwJJ4BAGBIPAMAwJB4BgCAIfEMAABD4hkAAIbEMwAADIlnAAAYEs8AADAkngEAYEg8AwDAkHgGAIChvVvZuKpOJPlGklNJnuzug1X1oiQfTLI/yYkkP97dX9vaNAEAYP2248jzD3T31d19cFk+kuSe7j6Q5J5lGQAAzntbOvJ8Gjckee3y+I4kn0jyzh34OZwj9h+5+xljJ44eWsNMAAB21laPPHeSP6yqe6vq8DL28u5+JEmW7y9btWFVHa6qY1V17NQTj29xGgAAsPO2euT5Nd39cFW9LMlHq+rPpht2921JbkuSS/cd6C3OAwAAdtyWjjx398PL98eSfCjJNUkerap9SbJ8f2yrkwQAgHPBWcdzVX1bVb3gqcdJfijJ/UnuSnLTstpNST681UkCAMC5YCunbbw8yYeq6qnX+a3u/oOq+kySO6vq5iRfTfKmrU8TAADW76zjubu/nOT7Voz/nySv38qkAADgXOQOgwAAMLQT13mGldd+Tlz/GQA4vznyDAAAQ+IZAACGxDMAAAyJZwAAGBLPAAAwJJ4BAGBIPAMAwJB4BgCAIfEMAABD4hkAAIbEMwAADIlnAAAYEs8AADC0d90T4OKy/8jdK8dPHD20yzMBAHjuHHkGAIAh8QwAAEPiGQAAhsQzAAAMiWcAABgSzwAAMORSdZyzXNYOADjXOPIMAABD4hkAAIbEMwAADIlnAAAYEs8AADAkngEAYMil6jgnnO6ydAAA5xJHngEAYEg8AwDAkHgGAIAh8QwAAEPiGQAAhsQzAAAMiWcAABgSzwAAMCSeAQBgSDwDAMCQeAYAgCHxDAAAQ+IZAACGxDMAAAyJZwAAGBLPAAAwJJ4BAGBIPAMAwJB4BgCAIfEMAABD4hkAAIbEMwAADIlnAAAYEs8AADAkngEAYEg8AwDAkHgGAIAh8QwAAEN71z0B2A77j9y9cvzE0UO7PBMA4EImnrmgnS6qVxHaAMCZOG0DAACGHHmGs+A0EQC4ODnyDAAAQ448c955LucxAwBsJ/EMO8wpHgBw4XDaBgAADIlnAAAYEs8AADDknGc4g+fyAUUfZgSAC1t197rnkEv3Heh9N/3yuqcB5wQfJASAnVNV93b3wbPd3mkbAAAw5LQNOMesOvXD0WgAODc48gwAAEM7duS5qq5L8itJ9iT5je4+ulM/Cy50O3WjFTdwAYDnZkfiuar2JPnPSf5lkpNJPlNVd3X3F3bi5wHbS1QDwGo7ddrGNUmOd/eXu/v/JvlAkht26GcBAMCu2JFL1VXVjyW5rrv/7bL8liTf391v37TO4SSHl8XvTXL/tk+E891LkvzFuifBOcd+wSr2C1axX7DKP+7uF5ztxjt1znOtGPt7ld7dtyW5LUmq6thWrrfHhcl+wSr2C1axX7CK/YJVqurYVrbfqdM2Tia5atPylUke3qGfBQAAu2Kn4vkzSQ5U1Suq6luS3Jjkrh36WQAAsCt25LSN7n6yqt6e5L9n41J17+3uB55lk9t2Yh6c9+wXrGK/YBX7BavYL1hlS/vFjnxgEAAALkTuMAgAAEPiGQAAhtYez1V1XVV9saqOV9WRdc+H9amqE1X1+aq676nLyFTVi6rqo1X1peX7C9c9T3ZWVb23qh6rqvs3ja3cD2rDry7vH5+rqlevb+bspNPsFz9XVX++vGfcV1XXb3ruXct+8cWq+uH1zJqdVFVXVdXHq+rBqnqgqt6xjHu/uIg9y36xbe8Xa43nTbfxfkOSVyZ5c1W9cp1zYu1+oLuv3nRdziNJ7unuA0nuWZa5sL0vyXVPGzvdfvCGJAeWr8NJ3rNLc2T3vS/P3C+S5NblPePq7v5Ikiz/jtyY5HuWbX5t+feGC8uTSX66u787ybVJbln+23u/uLidbr9Itun9Yt1Hnt3GmzO5Ickdy+M7krxxjXNhF3T3HyX5y6cNn24/uCHJ+3vDJ5NcXlX7dmem7KbT7Benc0OSD3T3N7v7K0mOZ+PfGy4g3f1Id392efyNJA8muSLeLy5qz7JfnM5zfr9YdzxfkeShTcsn8+y/IBe2TvKHVXXvcvv2JHl5dz+SbPwPkeRla5sd63S6/cB7CG9f/gT/3k2nddkvLjJVtT/Jq5J8Kt4vWDxtv0i26f1i3fF8xtt4c1F5TXe/Oht/Wrulqv7FuifEOc97yMXtPUm+M8nVSR5J8ovLuP3iIlJV357kd5P8ZHf/1bOtumLMfnGBWrFfbNv7xbrj2W28+f+6++Hl+2NJPpSNP5s8+tSf1Zbvj61vhqzR6fYD7yEXse5+tLtPdfffJvn1/N2fWu0XF4mquiQbgfSb3f17y7D3i4vcqv1iO98v1h3PbuNNkqSqvq2qXvDU4yQ/lOT+bOwPNy2r3ZTkw+uZIWt2uv3griRvXT5Ff22Sx5/6cy0Xvqedr/qj2XjPSDb2ixur6tKqekU2PiD26d2eHzurqirJ7Uke7O5f2vSU94uL2On2i+18v9iR23NPncVtvLlwvTzJhzb2+exN8lvd/QdV9Zkkd1bVzUm+muRNa5wju6CqfjvJa5O8pKpOJvnZJEezej/4SJLrs/EBjyeSvG3XJ8yuOM1+8dqqujobf2I9keQnkqS7H6iqO5N8IRufvL+lu0+tY97sqNckeUuSz1fVfcvYz8T7xcXudPvFm7fr/cLtuQEAYGjdp20AAMB5QzwDAMCQeAYAgCHxDAAAQ+IZAACGxDMAAAyJZwAAGPp/tcva5ZEJToYAAAAASUVORK5CYII=\n",
      "text/plain": [
       "<Figure size 864x864 with 1 Axes>"
      ]
     },
     "metadata": {
      "needs_background": "light"
     },
     "output_type": "display_data"
    },
    {
     "data": {
      "image/png": "iVBORw0KGgoAAAANSUhEUgAAAs8AAAKvCAYAAACVhiLtAAAABHNCSVQICAgIfAhkiAAAAAlwSFlzAAALEgAACxIB0t1+/AAAADh0RVh0U29mdHdhcmUAbWF0cGxvdGxpYiB2ZXJzaW9uMy4xLjMsIGh0dHA6Ly9tYXRwbG90bGliLm9yZy+AADFEAAAd6klEQVR4nO3df4xl91nf8c/TXeMQCHZ+17UtbQTblkDFJt0aS5GqkFBw7Ko2EqkcVYkVuV0qOSoI1LLJP4DUSItUMEQqUQ1O4yAgWEAUC7uA6yRC/JEfm2AcOwZlm2zjxZZdmsQEWaTy5ukfc7aZ2rOexzs/7v54vaTR3Pu95848q5xcv3Xm3HOruwMAAGzu76x6AAAAOFeIZwAAGBLPAAAwJJ4BAGBIPAMAwJB4BgCAoXE8V9WeqvrTqvr95f6rquoTVfX5qvrtqvqWZf3i5f6x5fF9OzM6AADsrudz5PnHkzy87v7PJ7m1u/cn+UqSm5f1m5N8pbu/K8mty3YAAHDOG8VzVV2R5Lokv7bcryRvSPI7yyZ3JLlhuX39cj/L429ctgcAgHPa3uF2v5TkPyR50XL/pUm+2t1PL/dPJLl8uX15kkeSpLufrqonl+3/av0PrKpDSQ4lSV30gn980UuveNYv/UeXXzL+hwAAwGY+/elP/1V3v/xMn79pPFfVP0/yRHd/uqpef2p5g0178Ng3F7pvS3Jbklx82f6+7KZfetaTjh65brPxAABgrKr+51aePzny/Lok/6Kqrk3ygiTfkbUj0ZdW1d7l6PMVSR5dtj+R5MokJ6pqb5JLknx5K0MCAMDZYNNznrv7nd19RXfvS3Jjko90979K8tEkP7psdlOSDy+371ruZ3n8I939rCPPAABwrtnKdZ5/OslPVtWxrJ3TfPuyfnuSly7rP5nk8NZGBACAs8P0DYNJku7+WJKPLbe/kOSqDbb52yRv3obZAADgrOITBgEAYEg8AwDAkHgGAIAh8QwAAEPiGQAAhsQzAAAMiWcAABgSzwAAMCSeAQBgSDwDAMCQeAYAgCHxDAAAQ+IZAACGxDMAAAyJZwAAGBLPAAAwJJ4BAGBIPAMAwJB4BgCAIfEMAABD4hkAAIbEMwAADIlnAAAYEs8AADAkngEAYEg8AwDAkHgGAIAh8QwAAEPiGQAAhsQzAAAMiWcAABgSzwAAMCSeAQBgSDwDAMCQeAYAgCHxDAAAQ+IZAACGxDMAAAyJZwAAGBLPAAAwJJ4BAGBIPAMAwJB4BgCAIfEMAABD4hkAAIbEMwAADIlnAAAYEs8AADAkngEAYEg8AwDAkHgGAIAh8QwAAEPiGQAAhsQzAAAMiWcAABgSzwAAMCSeAQBgSDwDAMCQeAYAgCHxDAAAQ+IZAACGxDMAAAyJZwAAGBLPAAAwJJ4BAGBIPAMAwJB4BgCAIfEMAABD4hkAAIbEMwAADIlnAAAYEs8AADAkngEAYGjTeK6qF1TVJ6vqz6rqoar6uWX9/VX1xaq6f/k6sKxXVb2nqo5V1QNV9dqd/kcAAMBu2DvY5utJ3tDdf1NVFyX5k6r6b8tj/767f+cZ278pyf7l6/uTvHf5DgAA57RNjzz3mr9Z7l60fPVzPOX6JB9YnvfxJJdW1WVbHxUAAFZrdM5zVe2pqvuTPJHk3u7+xPLQu5dTM26tqouXtcuTPLLu6SeWtWf+zENVdbSqjp586skt/BMAAGB3jOK5u09294EkVyS5qqq+N8k7k/zDJP8kyUuS/PSyeW30Izb4mbd198HuPrjnhZec0fAAALCbntfVNrr7q0k+luSa7n5sOTXj60n+a5Krls1OJLly3dOuSPLoNswKAAArNbnaxsur6tLl9rcm+cEkf37qPOaqqiQ3JHlwecpdSd62XHXj6iRPdvdjOzI9AADsosnVNi5LckdV7clabN/Z3b9fVR+pqpdn7TSN+5P822X7e5Jcm+RYkqeSvH37xwYAgN23aTx39wNJXrPB+htOs30nuWXrowEAwNnFJwwCAMCQeAYAgCHxDAAAQ+IZAACGxDMAAAyJZwAAGBLPAAAwJJ4BAGBIPAMAwJB4BgCAIfEMAABD4hkAAIbEMwAADIlnAAAYEs8AADAkngEAYEg8AwDAkHgGAIAh8QwAAEPiGQAAhsQzAAAMiWcAABgSzwAAMCSeAQBgSDwDAMCQeAYAgCHxDAAAQ+IZAACGxDMAAAyJZwAAGBLPAAAwJJ4BAGBIPAMAwJB4BgCAIfEMAABD4hkAAIbEMwAADIlnAAAYEs8AADAkngEAYGjvqgd4LvsO3/2steNHrlvBJAAA4MgzAACMiWcAABgSzwAAMCSeAQBgSDwDAMCQeAYAgCHxDAAAQ+IZAACGxDMAAAyJZwAAGBLPAAAwJJ4BAGBIPAMAwJB4BgCAIfEMAABD4hkAAIbEMwAADIlnAAAYEs8AADAkngEAYEg8AwDAkHgGAIAh8QwAAEPiGQAAhsQzAAAMiWcAABgSzwAAMCSeAQBgSDwDAMCQeAYAgCHxDAAAQ5vGc1W9oKo+WVV/VlUPVdXPLeuvqqpPVNXnq+q3q+pblvWLl/vHlsf37ew/AQAAdsfkyPPXk7yhu78vyYEk11TV1Ul+Psmt3b0/yVeS3Lxsf3OSr3T3dyW5ddkOAADOeZvGc6/5m+XuRctXJ3lDkt9Z1u9IcsNy+/rlfpbH31hVtW0TAwDAiozOea6qPVV1f5Inktyb5H8k+Wp3P71sciLJ5cvty5M8kiTL408meel2Dg0AAKswiufuPtndB5JckeSqJN+90WbL942OMvczF6rqUFUdraqjJ596cjovAACszPO62kZ3fzXJx5JcneTSqtq7PHRFkkeX2yeSXJkky+OXJPnyBj/rtu4+2N0H97zwkjObHgAAdtHkahsvr6pLl9vfmuQHkzyc5KNJfnTZ7KYkH15u37Xcz/L4R7r7WUeeAQDgXLN3801yWZI7qmpP1mL7zu7+/ar6XJIPVtV/TPKnSW5ftr89ya9X1bGsHXG+cQfmBgCAXbdpPHf3A0les8H6F7J2/vMz1/82yZu3ZToAADiL+IRBAAAYEs8AADAkngEAYEg8AwDAkHgGAIAh8QwAAEPiGQAAhsQzAAAMiWcAABgSzwAAMCSeAQBgSDwDAMCQeAYAgCHxDAAAQ+IZAACGxDMAAAyJZwAAGBLPAAAwJJ4BAGBIPAMAwJB4BgCAIfEMAABD4hkAAIbEMwAADIlnAAAYEs8AADAkngEAYEg8AwDAkHgGAIAh8QwAAEPiGQAAhsQzAAAMiWcAABgSzwAAMCSeAQBgSDwDAMCQeAYAgCHxDAAAQ+IZAACGxDMAAAyJZwAAGBLPAAAwJJ4BAGBIPAMAwJB4BgCAIfEMAABD4hkAAIbEMwAADIlnAAAYEs8AADAkngEAYEg8AwDAkHgGAIAh8QwAAEPiGQAAhsQzAAAMiWcAABgSzwAAMCSeAQBgSDwDAMCQeAYAgCHxDAAAQ+IZAACGxDMAAAyJZwAAGBLPAAAwJJ4BAGBIPAMAwJB4BgCAIfEMAABD4hkAAIbEMwAADIlnAAAY2rvZBlV1ZZIPJPm7Sb6R5Lbu/uWq+tkk/ybJ/1o2fVd337M8551Jbk5yMsm/6+4/3IHZz0v7Dt+94frxI9ft8iQAADzTpvGc5OkkP9Xdn6mqFyX5dFXduzx2a3f/p/UbV9Wrk9yY5HuS/L0k/72q/n53n9zOwQEAYLdtetpGdz/W3Z9Zbn8tycNJLn+Op1yf5IPd/fXu/mKSY0mu2o5hAQBglZ7XOc9VtS/Ja5J8Yll6R1U9UFXvq6oXL2uXJ3lk3dNOZIPYrqpDVXW0qo6efOrJ5z04AADstnE8V9W3J/ndJD/R3X+d5L1JvjPJgSSPJfmFU5tu8PR+1kL3bd19sLsP7nnhJc97cAAA2G2jeK6qi7IWzr/R3b+XJN39eHef7O5vJPnVfPPUjBNJrlz39CuSPLp9IwMAwGpsGs9VVUluT/Jwd//iuvXL1m32I0keXG7fleTGqrq4ql6VZH+ST27fyAAAsBqTq228Lslbk3y2qu5f1t6V5C1VdSBrp2QcT/JjSdLdD1XVnUk+l7UrddziShsAAJwPNo3n7v6TbHwe8z3P8Zx3J3n3FuYCAICzjk8YBACAIfEMAABD4hkAAIbEMwAADIlnAAAYEs8AADAkngEAYEg8AwDAkHgGAIAh8QwAAEPiGQAAhsQzAAAMiWcAABgSzwAAMCSeAQBgSDwDAMCQeAYAgCHxDAAAQ+IZAACGxDMAAAyJZwAAGBLPAAAwJJ4BAGBIPAMAwJB4BgCAIfEMAABD4hkAAIbEMwAADIlnAAAYEs8AADAkngEAYEg8AwDAkHgGAIAh8QwAAEPiGQAAhvaueoDtsu/w3RuuHz9y3S5PAgDA+cqRZwAAGBLPAAAwJJ4BAGBIPAMAwJB4BgCAIfEMAABD4hkAAIbEMwAADIlnAAAYEs8AADAkngEAYEg8AwDAkHgGAIAh8QwAAEPiGQAAhsQzAAAMiWcAABgSzwAAMCSeAQBgSDwDAMDQ3lUP8HztO3z3qkcAAOAC5cgzAAAMiWcAABgSzwAAMCSeAQBgSDwDAMCQeAYAgCHxDAAAQ+IZAACGxDMAAAyJZwAAGBLPAAAwJJ4BAGBIPAMAwJB4BgCAIfEMAABDm8ZzVV1ZVR+tqoer6qGq+vFl/SVVdW9VfX75/uJlvarqPVV1rKoeqKrX7vQ/AgAAdsPkyPPTSX6qu787ydVJbqmqVyc5nOS+7t6f5L7lfpK8Kcn+5etQkvdu+9QAALACm8Zzdz/W3Z9Zbn8tycNJLk9yfZI7ls3uSHLDcvv6JB/oNR9PcmlVXbbtkwMAwC57Xuc8V9W+JK9J8okkr+zux5K1wE7yimWzy5M8su5pJ5Y1AAA4p43juaq+PcnvJvmJ7v7r59p0g7Xe4OcdqqqjVXX05FNPTscAAICVGcVzVV2UtXD+je7+vWX58VOnYyzfn1jWTyS5ct3Tr0jy6DN/Znff1t0Hu/vgnhdecqbzAwDArplcbaOS3J7k4e7+xXUP3ZXkpuX2TUk+vG79bctVN65O8uSp0zsAAOBctnewzeuSvDXJZ6vq/mXtXUmOJLmzqm5O8qUkb14euyfJtUmOJXkqydu3deLnad/hu5+1dvzIdSuYBACAc92m8dzdf5KNz2NOkjdusH0nuWWLcwEAwFnHJwwCAMCQeAYAgCHxDAAAQ+IZAACGxDMAAAyJZwAAGBLPAAAwJJ4BAGBIPAMAwJB4BgCAIfEMAABD4hkAAIbEMwAADIlnAAAYEs8AADAkngEAYEg8AwDAkHgGAIAh8QwAAEPiGQAAhsQzAAAMiWcAABgSzwAAMCSeAQBgSDwDAMCQeAYAgCHxDAAAQ+IZAACGxDMAAAyJZwAAGBLPAAAwJJ4BAGBo76oHuJDtO3z3qkcAAOB5cOQZAACGxDMAAAyJZwAAGBLPAAAw5A2Du8AbAwEAzg+OPAMAwJAjz2doo6PJx49ct4JJAADYLY48AwDAkHgGAIAh8QwAAEPiGQAAhsQzAAAMiWcAABgSzwAAMCSeAQBgSDwDAMCQeAYAgCHxDAAAQ+IZAACGxDMAAAyJZwAAGBLPAAAwJJ4BAGBIPAMAwNDeVQ+wCvsO373h+vEj1+3yJAAAnEsceQYAgCHxDAAAQ+IZAACGxDMAAAyJZwAAGBLPAAAwJJ4BAGDogrzO80453fWjAQA4P4jnTQhiAABOcdoGAAAMiWcAABgSzwAAMCSeAQBgyBsG1/HmQAAAnosjzwAAMLRpPFfV+6rqiap6cN3az1bVX1bV/cvXtesee2dVHauqv6iqH96pwQEAYLdNjjy/P8k1G6zf2t0Hlq97kqSqXp3kxiTfszznV6pqz3YNCwAAq7RpPHf3Hyf58vDnXZ/kg9399e7+YpJjSa7awnwAAHDW2Mo5z++oqgeW0zpevKxdnuSRdducWNaepaoOVdXRqjp68qkntzAGAADsjjON5/cm+c4kB5I8luQXlvXaYNve6Ad0923dfbC7D+554SVnOAYAAOyeM4rn7n68u0929zeS/Gq+eWrGiSRXrtv0iiSPbm1EAAA4O5xRPFfVZevu/kiSU1fiuCvJjVV1cVW9Ksn+JJ/c2ogAAHB22PRDUqrqt5K8PsnLqupEkp9J8vqqOpC1UzKOJ/mxJOnuh6rqziSfS/J0klu6++TOjA4AALtr03ju7rdssHz7c2z/7iTv3spQAABwNvIJgwAAMCSeAQBgSDwDAMCQeAYAgCHxDAAAQ+IZAACGxDMAAAyJZwAAGBLPAAAwJJ4BAGBIPAMAwJB4BgCAIfEMAABD4hkAAIbEMwAADIlnAAAYEs8AADAkngEAYEg8AwDAkHgGAIAh8QwAAEPiGQAAhvauegC2377Ddz9r7fiR61YwCQDA+cWRZwAAGBLPAAAwJJ4BAGBIPAMAwJB4BgCAIVfbOIdtdFUNAAB2jiPPAAAwJJ4BAGBIPAMAwJB4BgCAIfEMAABD4hkAAIZcqu4c4bJ0AACr58gzAAAMiWcAABgSzwAAMCSeAQBgSDwDAMCQeAYAgCHxDAAAQ+IZAACGxDMAAAyJZwAAGBLPAAAwJJ4BAGBIPAMAwJB4BgCAIfEMAABD4hkAAIbEMwAADIlnAAAYEs8AADC0d9UDsDv2Hb57w/XjR67b5UkAAM5djjwDAMCQeAYAgCHxDAAAQ+IZAACGxDMAAAyJZwAAGBLPAAAwJJ4BAGBIPAMAwJB4BgCAIfEMAABD4hkAAIbEMwAADIlnAAAYEs8AADAkngEAYGjTeK6q91XVE1X14Lq1l1TVvVX1+eX7i5f1qqr3VNWxqnqgql67k8MDAMBumhx5fn+Sa56xdjjJfd29P8l9y/0keVOS/cvXoSTv3Z4xAQBg9TaN5+7+4yRffsby9UnuWG7fkeSGdesf6DUfT3JpVV22XcMCAMAqnek5z6/s7seSZPn+imX98iSPrNvuxLIGAADnvO1+w2BtsNYbblh1qKqOVtXRk089uc1jAADA9jvTeH781OkYy/cnlvUTSa5ct90VSR7d6Ad0923dfbC7D+554SVnOAYAAOyeM43nu5LctNy+KcmH162/bbnqxtVJnjx1egcAAJzr9m62QVX9VpLXJ3lZVZ1I8jNJjiS5s6puTvKlJG9eNr8nybVJjiV5Ksnbd2BmAABYiU3jubvfcpqH3rjBtp3klq0OBQAAZyOfMAgAAEPiGQAAhsQzAAAMiWcAABgSzwAAMCSeAQBgSDwDAMCQeAYAgCHxDAAAQ+IZAACGxDMAAAyJZwAAGBLPAAAwJJ4BAGBo76oHYLX2Hb57w/XjR67b5UkAAM5+jjwDAMCQeAYAgCHxDAAAQ+IZAACGxDMAAAyJZwAAGBLPAAAwJJ4BAGBIPAMAwJB4BgCAIfEMAABD4hkAAIbEMwAADIlnAAAYEs8AADAkngEAYEg8AwDAkHgGAIAh8QwAAEPiGQAAhsQzAAAMiWcAABgSzwAAMCSeAQBgSDwDAMCQeAYAgCHxDAAAQ+IZAACGxDMAAAztXfUAnJ32Hb77WWvHj1y3gkkAAM4ejjwDAMCQeAYAgCHxDAAAQ+IZAACGxDMAAAy52gZjG12B43RcmQMAOB858gwAAEPiGQAAhsQzAAAMiWcAABgSzwAAMCSeAQBgSDwDAMCQeAYAgCHxDAAAQ+IZAACGxDMAAAyJZwAAGBLPAAAwJJ4BAGBIPAMAwJB4BgCAIfEMAABD4hkAAIbEMwAADIlnAAAY2rvqASBJ9h2++1lrx49ct4JJAABOz5FnAAAY2tKR56o6nuRrSU4mebq7D1bVS5L8dpJ9SY4n+Zfd/ZWtjQkAAKu3HUeef6C7D3T3weX+4ST3dff+JPct9wEA4Jy3E6dtXJ/kjuX2HUlu2IHfAQAAu26rbxjsJH9UVZ3kv3T3bUle2d2PJUl3P1ZVr9joiVV1KMmhJNnzHS/f4hicbTZ6A2DiTYAAwLltq/H8uu5+dAnke6vqz6dPXEL7tiS5+LL9vcU5AABgx23ptI3ufnT5/kSSDyW5KsnjVXVZkizfn9jqkAAAcDY443iuqm+rqhedup3kh5I8mOSuJDctm92U5MNbHRIAAM4GWzlt45VJPlRVp37Ob3b3H1TVp5LcWVU3J/lSkjdvfUwAAFi9M47n7v5Cku/bYP1/J3njVoYCAICzkU8YBACAIfEMAABD4hkAAIbEMwAADG31Q1Jgx/iUQgDgbOPIMwAADIlnAAAYEs8AADAkngEAYMgbBtlVp3sTIADAucCRZwAAGBLPAAAwJJ4BAGBIPAMAwJB4BgCAIfEMAABD4hkAAIbEMwAADIlnAAAYEs8AADAkngEAYEg8AwDAkHgGAIAh8QwAAEPiGQAAhsQzAAAMiWcAABgSzwAAMCSeAQBgSDwDAMCQeAYAgCHxDAAAQ+IZAACGxDMAAAyJZwAAGBLPAAAwJJ4BAGBIPAMAwJB4BgCAIfEMAABD4hkAAIbEMwAADIlnAAAYEs8AADAkngEAYGjvqgeA52vf4buftXb8yHUrmAQAuNA48gwAAEPiGQAAhsQzAAAMiWcAABjyhkHOCxu9iTDxRkIAYHs58gwAAEPiGQAAhsQzAAAMiWcAABgSzwAAMCSeAQBgSDwDAMCQeAYAgCHxDAAAQ+IZAACGfDw3Fxwf5Q0AnClHngEAYEg8AwDAkHgGAIAh8QwAAEPeMAib2OgNht5cCAAXJkeeAQBgyJFnzmunuyzdVrcFAC5MjjwDAMCQeAYAgCGnbcAZ8CmFAHBhcuQZAACGduzIc1Vdk+SXk+xJ8mvdfWSnfhecixy9BoBzz47Ec1XtSfKfk/yzJCeSfKqq7uruz+3E74OzxXZcE3qnrvqx0RwCHgCen506beOqJMe6+wvd/X+SfDDJ9Tv0uwAAYFdUd2//D6360STXdPe/Xu6/Ncn3d/c71m1zKMmh5e73Jnlw2wfhXPeyJH+16iE469gv2Ij9go3YL9jIP+juF53pk3fqnOfaYO3/q/Tuvi3JbUlSVUe7++AOzcI5yn7BRuwXbMR+wUbsF2ykqo5u5fk7ddrGiSRXrrt/RZJHd+h3AQDArtipeP5Ukv1V9aqq+pYkNya5a4d+FwAA7IodOW2ju5+uqnck+cOsXarufd390HM85badmINznv2Cjdgv2Ij9go3YL9jIlvaLHXnDIAAAnI98wiAAAAyJZwAAGFp5PFfVNVX1F1V1rKoOr3oeVqeqjlfVZ6vq/lOXkamql1TVvVX1+eX7i1c9Jzurqt5XVU9U1YPr1jbcD2rNe5bXjweq6rWrm5yddJr94mer6i+X14z7q+radY+9c9kv/qKqfng1U7OTqurKqvpoVT1cVQ9V1Y8v614vLmDPsV9s2+vFSuN53cd4vynJq5O8papevcqZWLkf6O4D667LeTjJfd29P8l9y33Ob+9Pcs0z1k63H7wpyf7l61CS9+7SjOy+9+fZ+0WS3Lq8Zhzo7nuSZPnvyI1Jvmd5zq8s/73h/PJ0kp/q7u9OcnWSW5b/7b1eXNhOt18k2/R6seojzz7Gm81cn+SO5fYdSW5Y4Szsgu7+4yRffsby6faD65N8oNd8PMmlVXXZ7kzKbjrNfnE61yf5YHd/vbu/mORY1v57w3mkux/r7s8st7+W5OEkl8frxQXtOfaL03nerxerjufLkzyy7v6JPPc/kPNbJ/mjqvr08vHtSfLK7n4sWfs/RJJXrGw6Vul0+4HXEN6x/An+fetO67JfXGCqal+S1yT5RLxesHjGfpFs0+vFquN504/x5oLyuu5+bdb+tHZLVf3TVQ/EWc9ryIXtvUm+M8mBJI8l+YVl3X5xAamqb0/yu0l+orv/+rk23WDNfnGe2mC/2LbXi1XHs4/x5v/p7keX708k+VDW/mzy+Kk/qy3fn1jdhKzQ6fYDryEXsO5+vLtPdvc3kvxqvvmnVvvFBaKqLspaIP1Gd//esuz14gK30X6xna8Xq45nH+NNkqSqvq2qXnTqdpIfSvJg1vaHm5bNbkry4dVMyIqdbj+4K8nblnfRX53kyVN/ruX894zzVX8ka68Zydp+cWNVXVxVr8raG8Q+udvzsbOqqpLcnuTh7v7FdQ95vbiAnW6/2M7Xix35eO6pM/gYb85fr0zyobV9PnuT/GZ3/0FVfSrJnVV1c5IvJXnzCmdkF1TVbyV5fZKXVdWJJD+T5Eg23g/uSXJt1t7g8VSSt+/6wOyK0+wXr6+qA1n7E+vxJD+WJN39UFXdmeRzWXvn/S3dfXIVc7OjXpfkrUk+W1X3L2vviteLC93p9ou3bNfrhY/nBgCAoVWftgEAAOcM8QwAAEPiGQAAhsQzAAAMiWcAABgSzwAAMCSeAQBg6P8CHp/R0nwfPnEAAAAASUVORK5CYII=\n",
      "text/plain": [
       "<Figure size 864x864 with 1 Axes>"
      ]
     },
     "metadata": {
      "needs_background": "light"
     },
     "output_type": "display_data"
    },
    {
     "data": {
      "image/png": "iVBORw0KGgoAAAANSUhEUgAAAs8AAAKvCAYAAACVhiLtAAAABHNCSVQICAgIfAhkiAAAAAlwSFlzAAALEgAACxIB0t1+/AAAADh0RVh0U29mdHdhcmUAbWF0cGxvdGxpYiB2ZXJzaW9uMy4xLjMsIGh0dHA6Ly9tYXRwbG90bGliLm9yZy+AADFEAAAd6ElEQVR4nO3df6gl93nf8c/TXcWOE1fyb1RJsCbZtnFSIrtbRWAojp0msrZUDsRFptjCqGwKMjgktFnnnyRQwwYaKzU0BiVyLZckjkhiLCI1jSrbhED9Y+UosmTFeGtvrY2ERWpbcRBx0ebpH3fU3EpntY/2/jh3ta8XXM6Z75k593vR6OybuXNnqrsDAACc3d9Z9wQAAOB8IZ4BAGBIPAMAwJB4BgCAIfEMAABD4hkAAIbG8VxV+6rqT6rq95flV1fVp6vqS1X121X1Hcv4C5blE8vrB3Zm6gAAsLuey5Hndyd5aNPyLyW5ubsPJvlGkhuX8RuTfKO7vzfJzct6AABw3hvFc1VdnuRwkl9flivJG5P8zrLKbUnesjy/blnO8vqblvUBAOC8tn+43q8k+XdJXrwsvyzJN7v7yWX5VJLLlueXJXk4Sbr7yap6fFn/Lza/YVUdSXIkSeqiF/7ji152+TO+6T+67OLxDwIAAGdz7733/kV3v+Jctz9rPFfVP0/yWHffW1VveGp4xao9eO1vB7pvSXJLkrzg0oN96Q2/8oyNjh87fLbpAQDAWFX9r61sPzny/Pok/6Kqrk3ywiR/NxtHoi+pqv3L0efLkzyyrH8qyRVJTlXV/iQXJ/n6ViYJAAB7wVnPee7u93T35d19IMn1ST7e3f8qySeS/MSy2g1JPrY8v2NZzvL6x7v7GUeeAQDgfLOV6zz/bJKfrqoT2Tin+dZl/NYkL1vGfzrJ0a1NEQAA9obpHwwmSbr7k0k+uTz/cpKrVqzz10neug1zAwCAPcUdBgEAYEg8AwDAkHgGAIAh8QwAAEPiGQAAhsQzAAAMiWcAABgSzwAAMCSeAQBgSDwDAMCQeAYAgCHxDAAAQ+IZAACGxDMAAAyJZwAAGBLPAAAwJJ4BAGBIPAMAwJB4BgCAIfEMAABD4hkAAIbEMwAADIlnAAAYEs8AADAkngEAYEg8AwDAkHgGAIAh8QwAAEPiGQAAhsQzAAAMiWcAABgSzwAAMCSeAQBgSDwDAMCQeAYAgCHxDAAAQ+IZAACGxDMAAAyJZwAAGBLPAAAwJJ4BAGBIPAMAwJB4BgCAIfEMAABD4hkAAIbEMwAADIlnAAAYEs8AADAkngEAYEg8AwDAkHgGAIAh8QwAAEPiGQAAhsQzAAAMiWcAABgSzwAAMCSeAQBgSDwDAMCQeAYAgCHxDAAAQ+IZAACGxDMAAAyJZwAAGBLPAAAwJJ4BAGBIPAMAwJB4BgCAIfEMAABD4hkAAIbEMwAADIlnAAAYEs8AADAkngEAYOis8VxVL6yqz1TVn1bVg1X1i8v4h6rqK1V13/J15TJeVfX+qjpRVfdX1et2+ocAAIDdsH+wzreTvLG7/6qqLkryx1X1X5fX/m13/87T1n9zkoPL1w8l+cDyCAAA57WzHnnuDX+1LF60fPWzbHJdkg8v230qySVVdenWpwoAAOs1Oue5qvZV1X1JHktyd3d/ennpvcupGTdX1QuWscuSPLxp81PL2NPf80hVHa+q46efeHwLPwIAAOyOUTx39+nuvjLJ5UmuqqofSPKeJP8wyT9J8tIkP7usXqveYsV73tLdh7r70L4XXXxOkwcAgN30nK620d3fTPLJJNd096PLqRnfTvKfk1y1rHYqyRWbNrs8ySPbMFcAAFirydU2XlFVlyzPvzPJjyT5s6fOY66qSvKWJA8sm9yR5B3LVTeuTvJ4dz+6I7MHAIBdNLnaxqVJbquqfdmI7du7+/er6uNV9YpsnKZxX5J/s6x/V5Jrk5xI8kSSd27/tAEAYPedNZ67+/4kr10x/sYzrN9Jbtr61AAAYG9xh0EAABgSzwAAMCSeAQBgSDwDAMCQeAYAgCHxDAAAQ+IZAACGxDMAAAyJZwAAGBLPAAAwJJ4BAGBIPAMAwJB4BgCAIfEMAABD4hkAAIbEMwAADIlnAAAYEs8AADAkngEAYEg8AwDAkHgGAIAh8QwAAEPiGQAAhsQzAAAMiWcAABgSzwAAMCSeAQBgSDwDAMCQeAYAgCHxDAAAQ+IZAACGxDMAAAyJZwAAGBLPAAAwJJ4BAGBIPAMAwJB4BgCAIfEMAABD4hkAAIbEMwAADIlnAAAYEs8AADAkngEAYEg8AwDAkHgGAIAh8QwAAEPiGQAAhsQzAAAMiWcAABgSzwAAMCSeAQBgSDwDAMCQeAYAgCHxDAAAQ+IZAACGxDMAAAyJZwAAGBLPAAAwJJ4BAGBIPAMAwJB4BgCAIfEMAABD4hkAAIbEMwAADIlnAAAYEs8AADAkngEAYEg8AwDAkHgGAIAh8QwAAEPiGQAAhsQzAAAMnTWeq+qFVfWZqvrTqnqwqn5xGX91VX26qr5UVb9dVd+xjL9gWT6xvH5gZ38EAADYHZMjz99O8sbu/sEkVya5pqquTvJLSW7u7oNJvpHkxmX9G5N8o7u/N8nNy3oAAHDeO2s894a/WhYvWr46yRuT/M4yfluStyzPr1uWs7z+pqqqbZsxAACsyeic56raV1X3JXksyd1J/meSb3b3k8sqp5Jctjy/LMnDSbK8/niSl23npAEAYB1G8dzdp7v7yiSXJ7kqyfetWm15XHWUuZ8+UFVHqup4VR0//cTj0/kCAMDaPKerbXT3N5N8MsnVSS6pqv3LS5cneWR5firJFUmyvH5xkq+veK9buvtQdx/a96KLz232AACwiyZX23hFVV2yPP/OJD+S5KEkn0jyE8tqNyT52PL8jmU5y+sf7+5nHHkGAIDzzf6zr5JLk9xWVfuyEdu3d/fvV9UXknykqv59kj9Jcuuy/q1J/ktVncjGEefrd2DeAACw684az919f5LXrhj/cjbOf376+F8neeu2zA4AAPYQdxgEAIAh8QwAAEPiGQAAhsQzAAAMiWcAABgSzwAAMCSeAQBgSDwDAMCQeAYAgCHxDAAAQ+IZAACGxDMAAAyJZwAAGBLPAAAwJJ4BAGBIPAMAwJB4BgCAIfEMAABD4hkAAIbEMwAADIlnAAAYEs8AADAkngEAYEg8AwDAkHgGAIAh8QwAAEPiGQAAhsQzAAAMiWcAABgSzwAAMCSeAQBgSDwDAMCQeAYAgCHxDAAAQ+IZAACGxDMAAAyJZwAAGBLPAAAwJJ4BAGBIPAMAwJB4BgCAIfEMAABD4hkAAIbEMwAADIlnAAAYEs8AADAkngEAYEg8AwDAkHgGAIAh8QwAAEPiGQAAhsQzAAAMiWcAABgSzwAAMCSeAQBgSDwDAMCQeAYAgCHxDAAAQ+IZAACGxDMAAAyJZwAAGBLPAAAwJJ4BAGBIPAMAwJB4BgCAIfEMAABD4hkAAIbEMwAADIlnAAAYEs8AADAkngEAYEg8AwDAkHgGAIChs8ZzVV1RVZ+oqoeq6sGqevcy/gtV9edVdd/yde2mbd5TVSeq6otV9WM7+QMAAMBu2T9Y58kkP9Pdn6uqFye5t6ruXl67ubv/w+aVq+o1Sa5P8v1J/l6S/15Vf7+7T2/nxAEAYLed9chzdz/a3Z9bnn8ryUNJLnuWTa5L8pHu/nZ3fyXJiSRXbcdkAQBgnZ7TOc9VdSDJa5N8ehl6V1XdX1UfrKqXLGOXJXl402ansiK2q+pIVR2vquOnn3j8OU8cAAB22zieq+q7k/xukp/q7r9M8oEk35PkyiSPJvnlp1ZdsXk/Y6D7lu4+1N2H9r3o4uc8cQAA2G2jeK6qi7IRzr/R3b+XJN39te4+3d1/k+TX8renZpxKcsWmzS9P8sj2TRkAANbjrH8wWFWV5NYkD3X3+zaNX9rdjy6LP57kgeX5HUl+s6rel40/GDyY5DPbOus96sDRO1eOnzx2eJdnAgDATphcbeP1Sd6e5PNVdd8y9nNJ3lZVV2bjlIyTSX4ySbr7waq6PckXsnGljptcaQMAgOeDs8Zzd/9xVp/HfNezbPPeJO/dwrwAAGDPcYdBAAAYEs8AADAkngEAYEg8AwDA0ORqG+wil7sDANi7HHkGAIAh8QwAAEPiGQAAhsQzAAAMiWcAABgSzwAAMCSeAQBgSDwDAMCQeAYAgCHxDAAAQ+IZAACGxDMAAAyJZwAAGBLPAAAwJJ4BAGBIPAMAwJB4BgCAIfEMAABD4hkAAIbEMwAADIlnAAAYEs8AADAkngEAYEg8AwDAkHgGAIAh8QwAAEPiGQAAhvavewIXggNH71w5fvLY4V2eCQAAW+HIMwAADIlnAAAYEs8AADAkngEAYEg8AwDAkHgGAIAh8QwAAEPiGQAAhsQzAAAMiWcAABgSzwAAMCSeAQBgSDwDAMCQeAYAgCHxDAAAQ+IZAACGxDMAAAyJZwAAGBLPAAAwJJ4BAGBo/7oncCE7cPTOdU8BAIDnwJFnAAAYEs8AADAkngEAYEg8AwDAkHgGAIAh8QwAAEPiGQAAhsQzAAAMiWcAABja03cYXHUHvpPHDq9hJgAA4MgzAACMiWcAABgSzwAAMCSeAQBgSDwDAMCQeAYAgCHxDAAAQ3v6Os972aprUAMA8Px21iPPVXVFVX2iqh6qqger6t3L+Eur6u6q+tLy+JJlvKrq/VV1oqrur6rX7fQPAQAAu2Fy2saTSX6mu78vydVJbqqq1yQ5muSe7j6Y5J5lOUnenOTg8nUkyQe2fdYAALAGZ43n7n60uz+3PP9WkoeSXJbkuiS3LavdluQty/Prkny4N3wqySVVdem2zxwAAHbZc/qDwao6kOS1ST6d5FXd/WiyEdhJXrmsdlmShzdtdmoZAwCA89o4nqvqu5P8bpKf6u6/fLZVV4z1ivc7UlXHq+r46Scen04DAADWZhTPVXVRNsL5N7r795bhrz11Osby+NgyfirJFZs2vzzJI09/z+6+pbsPdfehfS+6+FznDwAAu2ZytY1KcmuSh7r7fZteuiPJDcvzG5J8bNP4O5arblyd5PGnTu8AAIDz2eQ6z69P8vYkn6+q+5axn0tyLMntVXVjkq8meevy2l1Jrk1yIskTSd65rTMGAIA1OWs8d/cfZ/V5zEnyphXrd5KbtjgvAADYc9xhcJNVdw08eezwGmYCAMBe9JwuVQcAABcy8QwAAEPiGQAAhsQzAAAMiWcAABgSzwAAMCSeAQBg6Ly7zvOqazEnrscMAMDOc+QZAACGxDMAAAyJZwAAGBLPAAAwJJ4BAGBIPAMAwJB4BgCAIfEMAABD4hkAAIbEMwAADIlnAAAYEs8AADC0f90T2GkHjt75jLGTxw6vYSYAAJzvHHkGAIAh8QwAAEPiGQAAhsQzAAAMiWcAABgSzwAAMCSeAQBgSDwDAMCQeAYAgCHxDAAAQ+IZAACGxDMAAAyJZwAAGBLPAAAwJJ4BAGBIPAMAwJB4BgCAIfEMAABD4hkAAIbEMwAADIlnAAAYEs8AADAkngEAYEg8AwDAkHgGAIAh8QwAAEPiGQAAhsQzAAAMiWcAABgSzwAAMLR/3RPY6w4cvXPdUwAAYI9w5BkAAIbEMwAADIlnAAAYEs8AADDkDwbPE6v+cPHkscNrmAkAwIXLkWcAABgSzwAAMCSeAQBgSDwDAMCQeAYAgCHxDAAAQ+IZAACGnjfXeV51HWQAANhOjjwDAMCQeAYAgCHxDAAAQ+IZAACGxDMAAAyJZwAAGBLPAAAwdNZ4rqoPVtVjVfXAprFfqKo/r6r7lq9rN732nqo6UVVfrKof26mJAwDAbpscef5QkmtWjN/c3VcuX3clSVW9Jsn1Sb5/2eZXq2rfdk0WAADW6ax3GOzuP6qqA8P3uy7JR7r720m+UlUnklyV5H+c8wx3gLsRAgBwLrZyzvO7qur+5bSOlyxjlyV5eNM6p5axZ6iqI1V1vKqOn37i8S1MAwAAdse5xvMHknxPkiuTPJrkl5fxWrFur3qD7r6luw9196F9L7r4HKcBAAC755ziubu/1t2nu/tvkvxaNk7NSDaONF+xadXLkzyytSkCAMDecE7xXFWXblr88SRPXYnjjiTXV9ULqurVSQ4m+czWpggAAHvDWf9gsKp+K8kbkry8qk4l+fkkb6iqK7NxSsbJJD+ZJN39YFXdnuQLSZ5MclN3n96ZqQMAwO6aXG3jbSuGb32W9d+b5L1bmRQAAOxF7jAIAABD4hkAAIbEMwAADIlnAAAYEs8AADAkngEAYEg8AwDAkHgGAIAh8QwAAEPiGQAAhsQzAAAMiWcAABgSzwAAMCSeAQBgSDwDAMCQeAYAgCHxDAAAQ+IZAACGxDMAAAyJZwAAGBLPAAAwJJ4BAGBIPAMAwJB4BgCAIfEMAABD4hkAAIbEMwAADIlnAAAYEs8AADAkngEAYEg8AwDAkHgGAICh/eueAOfuwNE7V46fPHZ4l2cCAHBhcOQZAACGxDMAAAyJZwAAGBLPAAAwJJ4BAGBIPAMAwJB4BgCAIfEMAABD4hkAAIbEMwAADIlnAAAYEs8AADAkngEAYEg8AwDAkHgGAIAh8QwAAEPiGQAAhsQzAAAMiWcAABgSzwAAMCSeAQBgSDwDAMCQeAYAgCHxDAAAQ+IZAACGxDMAAAyJZwAAGBLPAAAwJJ4BAGBIPAMAwJB4BgCAIfEMAABD4hkAAIbEMwAADIlnAAAYEs8AADAkngEAYEg8AwDAkHgGAIChs8ZzVX2wqh6rqgc2jb20qu6uqi8tjy9Zxquq3l9VJ6rq/qp63U5OHgAAdtPkyPOHklzztLGjSe7p7oNJ7lmWk+TNSQ4uX0eSfGB7pgkAAOt31nju7j9K8vWnDV+X5Lbl+W1J3rJp/MO94VNJLqmqS7drsgAAsE7nes7zq7r70SRZHl+5jF+W5OFN651axgAA4Ly3f5vfr1aM9coVq45k49SO7Pu7r9jmaTB14OidK8dPHju8yzMBANj7zvXI89eeOh1jeXxsGT+V5IpN612e5JFVb9Ddt3T3oe4+tO9FF5/jNAAAYPecazzfkeSG5fkNST62afwdy1U3rk7y+FOndwAAwPnurKdtVNVvJXlDkpdX1akkP5/kWJLbq+rGJF9N8tZl9buSXJvkRJInkrxzB+YMAABrcdZ47u63neGlN61Yt5PctNVJAQDAXuQOgwAAMCSeAQBgSDwDAMCQeAYAgCHxDAAAQ9t9h0H2gFV3DXTHQACArXPkGQAAhsQzAAAMiWcAABgSzwAAMCSeAQBgyNU2LhCrrsABAMBz48gzAAAMiWcAABgSzwAAMCSeAQBgSDwDAMCQeAYAgCHxDAAAQ+IZAACGxDMAAAyJZwAAGBLPAAAwJJ4BAGBIPAMAwJB4BgCAIfEMAABD4hkAAIbEMwAADIlnAAAYEs8AADAkngEAYEg8AwDAkHgGAIAh8QwAAEPiGQAAhsQzAAAMiWcAABgSzwAAMCSeAQBgSDwDAMCQeAYAgKH9654Ae9OBo3c+Y+zkscNrmAkAwN7hyDMAAAyJZwAAGBLPAAAwJJ4BAGBIPAMAwJB4BgCAIfEMAABD4hkAAIbEMwAADIlnAAAYEs8AADAkngEAYEg8AwDAkHgGAIAh8QwAAEPiGQAAhsQzAAAMiWcAABgSzwAAMCSeAQBgSDwDAMCQeAYAgCHxDAAAQ/vXPQHOHweO3rly/OSxw7s8EwCA9XDkGQAAhsQzAAAMiWcAABgSzwAAMCSeAQBgSDwDAMDQli5VV1Unk3wryekkT3b3oap6aZLfTnIgyckk/7K7v7G1aQIAwPptx5HnH+7uK7v70LJ8NMk93X0wyT3LMgAAnPd24rSN65Lctjy/LclbduB7AADArttqPHeSP6yqe6vqyDL2qu5+NEmWx1eu2rCqjlTV8ao6fvqJx7c4DQAA2HlbvT3367v7kap6ZZK7q+rPpht29y1JbkmSF1x6sLc4DwAA2HFbOvLc3Y8sj48l+WiSq5J8raouTZLl8bGtThIAAPaCc47nqvquqnrxU8+T/GiSB5LckeSGZbUbknxsq5MEAIC9YCunbbwqyUer6qn3+c3u/oOq+myS26vqxiRfTfLWrU8TAADW75zjubu/nOQHV4z/7yRv2sqkAABgL3KHQQAAGBLPAAAwtNVL1UEOHL3zGWMnjx1ew0wAAHaWI88AADAkngEAYEg8AwDAkHgGAIAh8QwAAEPiGQAAhsQzAAAMiWcAABgSzwAAMOQOg+yIVXcdTNx5EAA4vznyDAAAQ+IZAACGxDMAAAyJZwAAGBLPAAAwJJ4BAGBIPAMAwJB4BgCAIfEMAABD4hkAAIbEMwAADIlnAAAYEs8AADAkngEAYEg8AwDAkHgGAIAh8QwAAEPiGQAAhsQzAAAMiWcAABgSzwAAMCSeAQBgSDwDAMCQeAYAgKH9654AF5YDR+9cOX7y2OFdngkAwHPnyDMAAAyJZwAAGHLaBnuWUzwAgL3GkWcAABgSzwAAMOS0Dc47q07ncCoHALAbHHkGAIAh8QwAAEPiGQAAhsQzAAAMiWcAABgSzwAAMORSdewJZ7qbIADAXiKeeV5zTWgAYDs5bQMAAIbEMwAADIlnAAAYEs8AADAkngEAYEg8AwDAkEvV8bzgOtEAwG5w5BkAAIbEMwAADIlnAAAYEs8AADAkngEAYEg8AwDAkHgGAIAh8QwAAEPiGQAAhtxhkAvOme5GePLY4V2eCQBwvnHkGQAAhsQzAAAMOW0DFs/ldA6nfgDAhcmRZwAAGNqxI89VdU2S/5hkX5Jf7+5jO/W9YCed6SgzAHDh2ZF4rqp9Sf5Tkn+W5FSSz1bVHd39hZ34frCX7WR8O00EAHbXTp22cVWSE9395e7+P0k+kuS6HfpeAACwK6q7t/9Nq34iyTXd/a+X5bcn+aHuftemdY4kObIs/kCSB7Z9IpzvXp7kL9Y9CfYc+wWr2C9YxX7BKv+gu198rhvv1DnPtWLs/6v07r4lyS1JUlXHu/vQDs2F85T9glXsF6xiv2AV+wWrVNXxrWy/U6dtnEpyxably5M8skPfCwAAdsVOxfNnkxysqldX1XckuT7JHTv0vQAAYFfsyGkb3f1kVb0ryX/LxqXqPtjdDz7LJrfsxDw479kvWMV+wSr2C1axX7DKlvaLHfmDQQAAeD5yh0EAABgSzwAAMLT2eK6qa6rqi1V1oqqOrns+rE9Vnayqz1fVfU9dRqaqXlpVd1fVl5bHl6x7nuysqvpgVT1WVQ9sGlu5H9SG9y+fH/dX1evWN3N20hn2i1+oqj9fPjPuq6prN732nmW/+GJV/dh6Zs1OqqorquoTVfVQVT1YVe9exn1eXMCeZb/Yts+Ltcbzptt4vznJa5K8rapes845sXY/3N1Xbrou59Ek93T3wST3LMs8v30oyTVPGzvTfvDmJAeXryNJPrBLc2T3fSjP3C+S5OblM+PK7r4rSZZ/R65P8v3LNr+6/HvD88uTSX6mu78vydVJblr+2/u8uLCdab9ItunzYt1Hnt3Gm7O5Lslty/PbkrxljXNhF3T3HyX5+tOGz7QfXJfkw73hU0kuqapLd2em7KYz7Bdncl2Sj3T3t7v7K0lOZOPfG55HuvvR7v7c8vxbSR5Kcll8XlzQnmW/OJPn/Hmx7ni+LMnDm5ZP5dl/QJ7fOskfVtW9y+3bk+RV3f1osvE/RJJXrm12rNOZ9gOfIbxr+RX8Bzed1mW/uMBU1YEkr03y6fi8YPG0/SLZps+LdcfzWW/jzQXl9d39umz8au2mqvqn654Qe57PkAvbB5J8T5Irkzya5JeXcfvFBaSqvjvJ7yb5qe7+y2dbdcWY/eJ5asV+sW2fF+uOZ7fx5v/p7keWx8eSfDQbvzb52lO/VlseH1vfDFmjM+0HPkMuYN39te4+3d1/k+TX8re/arVfXCCq6qJsBNJvdPfvLcM+Ly5wq/aL7fy8WHc8u403SZKq+q6qevFTz5P8aJIHsrE/3LCsdkOSj61nhqzZmfaDO5K8Y/kr+quTPP7Ur2t5/nva+ao/no3PjGRjv7i+ql5QVa/Oxh+IfWa358fOqqpKcmuSh7r7fZte8nlxATvTfrGdnxc7cnvuqXO4jTfPX69K8tGNfT77k/xmd/9BVX02ye1VdWOSryZ56xrnyC6oqt9K8oYkL6+qU0l+PsmxrN4P7kpybTb+wOOJJO/c9QmzK86wX7yhqq7Mxq9YTyb5ySTp7ger6vYkX8jGX97f1N2n1zFvdtTrk7w9yeer6r5l7Ofi8+JCd6b94m3b9Xnh9twAADC07tM2AADgvCGeAQBgSDwDAMCQeAYAgCHxDAAAQ+IZAACGxDMAAAz9X54Iw9QRfxEIAAAAAElFTkSuQmCC\n",
      "text/plain": [
       "<Figure size 864x864 with 1 Axes>"
      ]
     },
     "metadata": {
      "needs_background": "light"
     },
     "output_type": "display_data"
    },
    {
     "data": {
      "image/png": "iVBORw0KGgoAAAANSUhEUgAAAs8AAAKvCAYAAACVhiLtAAAABHNCSVQICAgIfAhkiAAAAAlwSFlzAAALEgAACxIB0t1+/AAAADh0RVh0U29mdHdhcmUAbWF0cGxvdGxpYiB2ZXJzaW9uMy4xLjMsIGh0dHA6Ly9tYXRwbG90bGliLm9yZy+AADFEAAAd/0lEQVR4nO3dbaxl51nf4f9dj3EIBDvvmtqWJoJpS2iFk7rGUqQqJBQSD6qDRCpHFbEiS0MlRwoCtUz4AkiNNJEKppGKVYPTOBUkWEAUC6eU1EmE+JCXcTCOHZNmmgzxYCsWTWKCLFJ5uPvhLDen9h6f23Ne9rxcl3R09n72Wnueo6xs//Scddaq7g4AALC1v7fuCQAAwLlCPAMAwJB4BgCAIfEMAABD4hkAAIbEMwAADI3juaouqqo/rao/WJ6/oqo+VVVfrKrfqarvWMYvWZ4fX14/sDtTBwCAvfVcVp7fkeShTc/fneSW7j6Y5OtJblrGb0ry9e7+viS3LNsBAMA5bxTPVXVFkkNJfnN5Xklel+R3l03uSPKm5fH1y/Msr79+2R4AAM5p+4bb/VqSf5fkBcvzFyf5Rnc/uTw/meTy5fHlSR5Oku5+sqoeX7b/q81vWFWHkxxOkrr4ef/04hdf8Yx/9J9cfun4BwEAgK3ce++9f9XdLz3T/beM56r68SSPdfe9VfXap4ZXbNqD17490H1bktuS5JL9B3v/jb/2jJ2OHT201fQAAGCsqv5iO/tPVp5fk+RfVtV1SZ6X5HuysRJ9WVXtW1afr0jyyLL9ySRXJjlZVfuSXJrka9uZJAAAnA22POe5u9/Z3Vd094EkNyT5WHf/6yQfT/KTy2Y3Jvnw8viu5XmW1z/W3c9YeQYAgHPNdq7z/PNJfraqjmfjnObbl/Hbk7x4Gf/ZJEe2N0UAADg7TP9gMEnS3Z9I8onl8ZeSXLNim79N8uYdmBsAAJxV3GEQAACGxDMAAAyJZwAAGBLPAAAwJJ4BAGBIPAMAwJB4BgCAIfEMAABD4hkAAIbEMwAADIlnAAAYEs8AADAkngEAYEg8AwDAkHgGAIAh8QwAAEPiGQAAhsQzAAAMiWcAABgSzwAAMCSeAQBgSDwDAMCQeAYAgCHxDAAAQ+IZAACGxDMAAAyJZwAAGBLPAAAwJJ4BAGBIPAMAwJB4BgCAIfEMAABD4hkAAIbEMwAADIlnAAAYEs8AADAkngEAYEg8AwDAkHgGAIAh8QwAAEPiGQAAhsQzAAAMiWcAABgSzwAAMCSeAQBgSDwDAMCQeAYAgCHxDAAAQ+IZAACGxDMAAAyJZwAAGBLPAAAwJJ4BAGBIPAMAwJB4BgCAIfEMAABD4hkAAIbEMwAADIlnAAAYEs8AADAkngEAYEg8AwDAkHgGAIAh8QwAAEPiGQAAhsQzAAAMiWcAABgSzwAAMCSeAQBgSDwDAMCQeAYAgCHxDAAAQ+IZAACGtoznqnpeVX26qv6sqh6sql9ext9XVV+uqvuWr6uW8aqq91TV8aq6v6pevds/BAAA7IV9g22+leR13f03VXVxkj+pqv+2vPZvu/t3n7b9G5McXL5+KMmty3cAADinbbny3Bv+Znl68fLVz7LL9Unev+z3ySSXVdX+7U8VAADWa3TOc1VdVFX3JXksyUe7+1PLS+9aTs24paouWcYuT/Lwpt1PLmNPf8/DVXWsqo6deuLxbfwIAACwN0bx3N2nuvuqJFckuaaq/nGSdyb5R0n+WZIXJfn5ZfNa9RYr3vO27r66u6++6PmXntHkAQBgLz2nq2109zeSfCLJG7r70eXUjG8l+S9Jrlk2O5nkyk27XZHkkR2YKwAArNXkahsvrarLlsffmeRHkvz5U+cxV1UleVOSB5Zd7kry1uWqG9cmeby7H92V2QMAwB6aXG1jf5I7quqibMT2nd39B1X1sap6aTZO07gvyb9Ztv9IkuuSHE/yRJK37fy0AQBg720Zz919f5JXrRh/3Wm27yQ3b39qAABwdnGHQQAAGBLPAAAwJJ4BAGBIPAMAwJB4BgCAIfEMAABD4hkAAIbEMwAADIlnAAAYEs8AADAkngEAYEg8AwDAkHgGAIAh8QwAAEPiGQAAhsQzAAAMiWcAABgSzwAAMCSeAQBgSDwDAMCQeAYAgCHxDAAAQ+IZAACGxDMAAAyJZwAAGBLPAAAwJJ4BAGBIPAMAwJB4BgCAIfEMAABD4hkAAIbEMwAADIlnAAAYEs8AADAkngEAYEg8AwDAkHgGAIAh8QwAAEPiGQAAhsQzAAAMiWcAABgSzwAAMCSeAQBgSDwDAMCQeAYAgCHxDAAAQ+IZAACGxDMAAAyJZwAAGBLPAAAwJJ4BAGBIPAMAwJB4BgCAIfEMAABD4hkAAIbEMwAADIlnAAAYEs8AADAkngEAYEg8AwDAkHgGAIAh8QwAAEPiGQAAhsQzAAAMiWcAABgSzwAAMCSeAQBgSDwDAMCQeAYAgCHxDAAAQ+IZAACGxDMAAAxtGc9V9byq+nRV/VlVPVhVv7yMv6KqPlVVX6yq36mq71jGL1meH19eP7C7PwIAAOyNycrzt5K8rrt/MMlVSd5QVdcmeXeSW7r7YJKvJ7lp2f6mJF/v7u9LcsuyHQAAnPO2jOfe8DfL04uXr07yuiS/u4zfkeRNy+Prl+dZXn99VdWOzRgAANZkdM5zVV1UVfcleSzJR5P8ryTf6O4nl01OJrl8eXx5koeTZHn98SQv3slJAwDAOoziubtPdfdVSa5Ick2S71+12fJ91SpzP32gqg5X1bGqOnbqicen8wUAgLV5Tlfb6O5vJPlEkmuTXFZV+5aXrkjyyPL4ZJIrk2R5/dIkX1vxXrd199XdffVFz7/0zGYPAAB7aHK1jZdW1WXL4+9M8iNJHkry8SQ/uWx2Y5IPL4/vWp5nef1j3f2MlWcAADjX7Nt6k+xPckdVXZSN2L6zu/+gqj6f5INV9e+T/GmS25ftb0/yX6vqeDZWnG/YhXkDAMCe2zKeu/v+JK9aMf6lbJz//PTxv03y5h2ZHQAAnEXcYRAAAIbEMwAADIlnAAAYEs8AADAkngEAYEg8AwDAkHgGAIAh8QwAAEPiGQAAhsQzAAAMiWcAABgSzwAAMCSeAQBgSDwDAMCQeAYAgCHxDAAAQ+IZAACG9q17As/mwJG7nzF24uihNcwEAACsPAMAwJh4BgCAIfEMAABD4hkAAIbEMwAADIlnAAAYEs8AADAkngEAYEg8AwDAkHgGAIAh8QwAAEPiGQAAhsQzAAAMiWcAABgSzwAAMCSeAQBgSDwDAMCQeAYAgCHxDAAAQ+IZAACGxDMAAAyJZwAAGBLPAAAwJJ4BAGBIPAMAwJB4BgCAIfEMAABD4hkAAIbEMwAADIlnAAAYEs8AADAkngEAYEg8AwDAkHgGAIAh8QwAAEPiGQAAhsQzAAAMiWcAABgSzwAAMCSeAQBgSDwDAMCQeAYAgCHxDAAAQ+IZAACGxDMAAAyJZwAAGBLPAAAwJJ4BAGBIPAMAwJB4BgCAIfEMAABD4hkAAIbEMwAADIlnAAAYEs8AADC0ZTxX1ZVV9fGqeqiqHqyqdyzjv1RVf1lV9y1f123a551VdbyqvlBVP7abPwAAAOyVfYNtnkzyc9392ap6QZJ7q+qjy2u3dPd/2LxxVb0yyQ1JfiDJ30/yP6rqH3T3qZ2cOAAA7LUtV567+9Hu/uzy+JtJHkpy+bPscn2SD3b3t7r7y0mOJ7lmJyYLAADr9JzOea6qA0leleRTy9Dbq+r+qnpvVb1wGbs8ycObdjuZFbFdVYer6lhVHTv1xOPPeeIAALDXxvFcVd+d5PeS/Ex3/3WSW5N8b5Krkjya5Fee2nTF7v2Mge7buvvq7r76oudf+pwnDgAAe20Uz1V1cTbC+be6+/eTpLu/2t2nuvvvkvxGvn1qxskkV27a/Yokj+zclAEAYD0mV9uoJLcneai7f3XT+P5Nm/1EkgeWx3cluaGqLqmqVyQ5mOTTOzdlAABYj8nVNl6T5KeSfK6q7lvGfiHJW6rqqmycknEiyU8nSXc/WFV3Jvl8Nq7UcbMrbQAAcD7YMp67+0+y+jzmjzzLPu9K8q5tzAsAAM467jAIAABD4hkAAIYm5zyzhw4cuXvl+Imjh/Z4JgAAPJ2VZwAAGBLPAAAwJJ4BAGBIPAMAwJB4BgCAIfEMAABD4hkAAIbEMwAADIlnAAAYEs8AADAkngEAYEg8AwDAkHgGAIAh8QwAAEPiGQAAhsQzAAAMiWcAABgSzwAAMCSeAQBgSDwDAMDQvnVP4Hxy4MjdK8dPHD20xzMBAGA3WHkGAIAh8QwAAEPiGQAAhpzzvAecCw0AcH6w8gwAAEPiGQAAhs650zacAgEAwLpYeQYAgCHxDAAAQ+IZAACGxDMAAAyJZwAAGBLPAAAwJJ4BAGBIPAMAwJB4BgCAIfEMAABD59ztuc8Wp7tNOAAA5y8rzwAAMCSeAQBgSDwDAMCQeAYAgCHxDAAAQ+IZAACGxDMAAAyJZwAAGBLPAAAwJJ4BAGBIPAMAwJB4BgCAIfEMAABD4hkAAIbEMwAADIlnAAAYEs8AADAkngEAYEg8AwDAkHgGAIAh8QwAAEPiGQAAhsQzAAAMiWcAABgSzwAAMCSeAQBgSDwDAMCQeAYAgCHxDAAAQ+IZAACGtoznqrqyqj5eVQ9V1YNV9Y5l/EVV9dGq+uLy/YXLeFXVe6rqeFXdX1Wv3u0fAgAA9sJk5fnJJD/X3d+f5NokN1fVK5McSXJPdx9Mcs/yPEnemOTg8nU4ya07PmsAAFiDLeO5ux/t7s8uj7+Z5KEklye5Pskdy2Z3JHnT8vj6JO/vDZ9McllV7d/xmQMAwB57Tuc8V9WBJK9K8qkkL+/uR5ONwE7ysmWzy5M8vGm3k8sYAACc08bxXFXfneT3kvxMd//1s226YqxXvN/hqjpWVcdOPfH4dBoAALA2+yYbVdXF2Qjn3+ru31+Gv1pV+7v70eW0jMeW8ZNJrty0+xVJHnn6e3b3bUluS5JL9h98Rlw/VweO3L1y/MTRQ9t9awAASDK72kYluT3JQ939q5teuivJjcvjG5N8eNP4W5erblyb5PGnTu8AAIBz2WTl+TVJfirJ56rqvmXsF5IcTXJnVd2U5CtJ3ry89pEk1yU5nuSJJG/b0RkDAMCabBnP3f0nWX0ec5K8fsX2neTmbc4LAADOOu4wCAAAQ+IZAACGxDMAAAyNLlXH7jjd5fUAADg7WXkGAIAh8QwAAEPiGQAAhsQzAAAMiWcAABgSzwAAMCSeAQBgSDwDAMCQeAYAgCHxDAAAQ+IZAACGxDMAAAyJZwAAGBLPAAAwJJ4BAGBIPAMAwJB4BgCAIfEMAABD4hkAAIbEMwAADIlnAAAYEs8AADAkngEAYEg8AwDAkHgGAIAh8QwAAEPiGQAAhvatewLrcODI3SvHTxw9tMczAQDgXHLex/PpQhkAAJ4rp20AAMCQeAYAgCHxDAAAQ+IZAACGxDMAAAyJZwAAGBLPAAAwJJ4BAGBIPAMAwJB4BgCAIfEMAABD4hkAAIb2rXsCZ7sDR+5e9xQAADhLWHkGAIAhK8+bWGUGAODZWHkGAIAh8QwAAEPiGQAAhsQzAAAMiWcAABgSzwAAMCSeAQBgSDwDAMCQeAYAgCHxDAAAQ+IZAACGxDMAAAyJZwAAGBLPAAAwtG/dE2DmwJG7nzF24uihNcwEAODCZeUZAACGxDMAAAw5beMctupUjsTpHAAAu8XKMwAADIlnAAAYEs8AADAkngEAYEg8AwDAkHgGAIAh8QwAAENbxnNVvbeqHquqBzaN/VJV/WVV3bd8XbfptXdW1fGq+kJV/dhuTRwAAPbaZOX5fUnesGL8lu6+avn6SJJU1SuT3JDkB5Z9fr2qLtqpyQIAwDptGc/d/cdJvjZ8v+uTfLC7v9XdX05yPMk125gfAACcNbZzzvPbq+r+5bSOFy5jlyd5eNM2J5exZ6iqw1V1rKqOnXri8W1MAwAA9saZxvOtSb43yVVJHk3yK8t4rdi2V71Bd9/W3Vd399UXPf/SM5wGAADsnTOK5+7+anef6u6/S/Ib+fapGSeTXLlp0yuSPLK9KQIAwNnhjOK5qvZvevoTSZ66EsddSW6oqkuq6hVJDib59PamCAAAZ4d9W21QVR9I8tokL6mqk0l+Mclrq+qqbJyScSLJTydJdz9YVXcm+XySJ5Pc3N2ndmfqAACwt7aM5+5+y4rh259l+3cledd2JgUAAGcjdxgEAIAh8QwAAEPiGQAAhsQzAAAMiWcAABgSzwAAMCSeAQBgSDwDAMCQeAYAgCHxDAAAQ+IZAACGxDMAAAyJZwAAGBLPAAAwJJ4BAGBIPAMAwJB4BgCAIfEMAABD4hkAAIbEMwAADIlnAAAYEs8AADAkngEAYEg8AwDAkHgGAIAh8QwAAEPiGQAAhsQzAAAMiWcAABgSzwAAMCSeAQBgSDwDAMCQeAYAgCHxDAAAQ+IZAACGxDMAAAyJZwAAGBLPAAAwJJ4BAGBIPAMAwJB4BgCAIfEMAABD4hkAAIbEMwAADIlnAAAYEs8AADAkngEAYEg8AwDAkHgGAIAh8QwAAEPiGQAAhsQzAAAMiWcAABgSzwAAMCSeAQBgSDwDAMCQeAYAgCHxDAAAQ+IZAACGxDMAAAyJZwAAGBLPAAAwJJ4BAGBIPAMAwNC+dU+AnXfgyN3PGDtx9NAaZgIAcH6x8gwAAEPiGQAAhsQzAAAMiWcAABgSzwAAMCSeAQBgSDwDAMDQlvFcVe+tqseq6oFNYy+qqo9W1ReX7y9cxquq3lNVx6vq/qp69W5OHgAA9tJk5fl9Sd7wtLEjSe7p7oNJ7lmeJ8kbkxxcvg4nuXVnpgkAAOu3ZTx39x8n+drThq9Pcsfy+I4kb9o0/v7e8Mkkl1XV/p2aLAAArNOZnvP88u5+NEmW7y9bxi9P8vCm7U4uYwAAcM7b6T8YrBVjvXLDqsNVdayqjp164vEdngYAAOy8M43nrz51Osby/bFl/GSSKzdtd0WSR1a9QXff1t1Xd/fVFz3/0jOcBgAA7J0zjee7kty4PL4xyYc3jb91uerGtUkef+r0DgAAONft22qDqvpAktcmeUlVnUzyi0mOJrmzqm5K8pUkb142/0iS65IcT/JEkrftwpwBAGAttozn7n7LaV56/YptO8nN250UAACcjdxhEAAAhsQzAAAMiWcAABgSzwAAMCSeAQBgSDwDAMCQeAYAgCHxDAAAQ+IZAACGxDMAAAyJZwAAGBLPAAAwJJ4BAGBIPAMAwJB4BgCAIfEMAABD4hkAAIbEMwAADIlnAAAYEs8AADAkngEAYEg8AwDAkHgGAIAh8QwAAEPiGQAAhsQzAAAMiWcAABgSzwAAMCSeAQBgSDwDAMCQeAYAgCHxDAAAQ/vWPQHW68CRu1eOnzh6aI9nAgBw9rPyDAAAQ+IZAACGxDMAAAyJZwAAGBLPAAAwJJ4BAGBIPAMAwJDrPF8gTnc9ZwAA5qw8AwDAkHgGAIAh8QwAAEPiGQAAhsQzAAAMiWcAABhyqTpWWnVpuxNHD61hJgAAZw8rzwAAMCSeAQBgSDwDAMCQeAYAgCHxDAAAQ+IZAACGxDMAAAyJZwAAGBLPAAAwJJ4BAGBIPAMAwJB4BgCAIfEMAABD4hkAAIbEMwAADIlnAAAYEs8AADAkngEAYEg8AwDAkHgGAIAh8QwAAEPiGQAAhsQzAAAMiWcAABgSzwAAMLRvOztX1Ykk30xyKsmT3X11Vb0oye8kOZDkRJJ/1d1f3940AQBg/XZi5fmHu/uq7r56eX4kyT3dfTDJPctzAAA45+3GaRvXJ7ljeXxHkjftwr8BAAB7blunbSTpJH9UVZ3kP3f3bUle3t2PJkl3P1pVL1u1Y1UdTnI4SS76npducxqs04Ejdz9j7MTRQ2uYCQDA7tpuPL+mux9ZAvmjVfXn0x2X0L4tSS7Zf7C3OQ8AANh124rn7n5k+f5YVX0oyTVJvlpV+5dV5/1JHtuBeXIWWLXCDABwITnjc56r6ruq6gVPPU7yo0keSHJXkhuXzW5M8uHtThIAAM4G21l5fnmSD1XVU+/z2939h1X1mSR3VtVNSb6S5M3bnyYAAKzfGcdzd38pyQ+uGP/fSV6/nUkBAMDZyB0GAQBgSDwDAMCQeAYAgCHxDAAAQ+IZAACGxDMAAAxt9/bc8Jyc7i6FJ44e2uOZAAA8d1aeAQBgSDwDAMCQeAYAgCHxDAAAQ/5gkF1xuj8MBAA4l1l5BgCAIfEMAABD4hkAAIbEMwAADIlnAAAYEs8AADAkngEAYMh1njkrrLou9Imjh9YwEwCA07PyDAAAQ+IZAACGxDMAAAyJZwAAGBLPAAAwJJ4BAGBIPAMAwJDrPHPWWnXt58T1nwGA9bHyDAAAQ+IZAACGxDMAAAyJZwAAGBLPAAAwJJ4BAGBIPAMAwJB4BgCAIfEMAABD7jDIOWfVnQfddRAA2AtWngEAYEg8AwDAkHgGAIAh8QwAAEPiGQAAhsQzAAAMiWcAABgSzwAAMCSeAQBgSDwDAMCQ23NzXlh1y+7EbbsBgJ1l5RkAAIbEMwAADIlnAAAYEs8AADAkngEAYEg8AwDAkHgGAIAh8QwAAEPiGQAAhsQzAAAMiWcAABgSzwAAMCSeAQBgSDwDAMCQeAYAgKF9654A7LUDR+5eOX7i6KE9ngkAcK6x8gwAAENWnmELq1aqn8sqtZVuADh/WHkGAIAhK8+c10636rtb72s1GQDOb+IZzgFiHQDODk7bAACAISvPsCZWkwHg3GPlGQAAhnZt5bmq3pDkPya5KMlvdvfR3fq3YCfs1h8XAgDnj+runX/TqouS/M8k/yLJySSfSfKW7v78qu0v2X+w99/4azs+D+DbnA4CAElV3dvdV5/p/rt12sY1SY5395e6+/8k+WCS63fp3wIAgD2xW6dtXJ7k4U3PTyb5oc0bVNXhJIeXp9/6i3f/+AO7NBfOXS9J8lfrnsT5ot697hnsGMcFqzguWMVxwSr/cDs771Y814qx/+/8kO6+LcltSVJVx7azfM75yXHBKo4LVnFcsIrjglWq6th29t+t0zZOJrly0/MrkjyyS/8WAADsid2K588kOVhVr6iq70hyQ5K7dunfAgCAPbErp21095NV9fYk/z0bl6p7b3c/+Cy73LYb8+Cc57hgFccFqzguWMVxwSrbOi525VJ1AABwPnKHQQAAGBLPAAAwtPZ4rqo3VNUXqup4VR1Z93xYn6o6UVWfq6r7nrqMTFW9qKo+WlVfXL6/cN3zZHdV1Xur6rGqemDT2MrjoDa8Z/n8uL+qXr2+mbObTnNc/FJV/eXymXFfVV236bV3LsfFF6rqx9Yza3ZTVV1ZVR+vqoeq6sGqescy7vPiAvYsx8WOfV6sNZ6X23j/pyRvTPLKJG+pqleuc06s3Q9391Wbrst5JMk93X0wyT3Lc85v70vyhqeNne44eGOSg8vX4SS37tEc2XvvyzOPiyS5ZfnMuKq7P5Iky39HbkjyA8s+v77894bzy5NJfq67vz/JtUluXv6393lxYTvdcZHs0OfFulee3cabrVyf5I7l8R1J3rTGubAHuvuPk3ztacOnOw6uT/L+3vDJJJdV1f69mSl76TTHxelcn+SD3f2t7v5ykuPZ+O8N55HufrS7P7s8/maSh7Jxh2OfFxewZzkuTuc5f16sO55X3cb72X5Azm+d5I+q6t7l9u1J8vLufjTZ+D9EkpetbXas0+mOA58hvH35Ffx7N53W5bi4wFTVgSSvSvKp+Lxg8bTjItmhz4t1x/OWt/HmgvKa7n51Nn61dnNV/fN1T4izns+QC9utSb43yVVJHk3yK8u44+ICUlXfneT3kvxMd//1s226YsxxcZ5acVzs2OfFuuPZbbz5f7r7keX7Y0k+lI1fm3z1qV+rLd8fW98MWaPTHQc+Qy5g3f3V7j7V3X+X5Dfy7V+1Oi4uEFV1cTYC6be6+/eXYZ8XF7hVx8VOfl6sO57dxpskSVV9V1W94KnHSX40yQPZOB5uXDa7McmH1zND1ux0x8FdSd66/BX9tUkef+rXtZz/nna+6k9k4zMj2TgubqiqS6rqFdn4A7FP7/X82F1VVUluT/JQd//qppd8XlzATndc7OTnxa7cnnvqDG7jzfnr5Uk+tHHMZ1+S3+7uP6yqzyS5s6puSvKVJG9e4xzZA1X1gSSvTfKSqjqZ5BeTHM3q4+AjSa7Lxh94PJHkbXs+YfbEaY6L11bVVdn4FeuJJD+dJN39YFXdmeTz2fjL+5u7+9Q65s2uek2Sn0ryuaq6bxn7hfi8uNCd7rh4y059Xrg9NwAADK37tA0AADhniGcAABgSzwAAMCSeAQBgSDwDAMCQeAYAgCHxDAAAQ/8Xdr/PoEyji9UAAAAASUVORK5CYII=\n",
      "text/plain": [
       "<Figure size 864x864 with 1 Axes>"
      ]
     },
     "metadata": {
      "needs_background": "light"
     },
     "output_type": "display_data"
    },
    {
     "data": {
      "image/png": "iVBORw0KGgoAAAANSUhEUgAAAs8AAAKvCAYAAACVhiLtAAAABHNCSVQICAgIfAhkiAAAAAlwSFlzAAALEgAACxIB0t1+/AAAADh0RVh0U29mdHdhcmUAbWF0cGxvdGxpYiB2ZXJzaW9uMy4xLjMsIGh0dHA6Ly9tYXRwbG90bGliLm9yZy+AADFEAAAd00lEQVR4nO3df6zdd33f8dd7dhpKYQk/I8+O5Ih6G7CphnlppEhTCl0JcTUHqZmCJohQJDMpSKCirYZ/oNKQjDRIh7RGMk2GmSgQ8UOJcNY1CyDEHwQcmoaEFOGBS0ysWAwwoKiZYj774349bu3j3Ld9fxxf+/GQru45n/M912+LLydPfe/X32+NMQIAACztH8x7AAAAWC/EMwAANIlnAABoEs8AANAkngEAoEk8AwBAUzueq2pDVf1VVX1hen5VVT1YVd+tqk9X1a9N65dOzw9Nr29dndEBAGBtnc2R53cmeXzR8w8muX2MsS3JT5LcOq3fmuQnY4zfTHL7tB0AAKx7rXiuqi1Jdib5s+l5JXldks9Mm+xPcuP0eNf0PNPrr5+2BwCAdW1jc7s/SfIfk7xwev6SJD8dYzw7PT+SZPP0eHOSJ5JkjPFsVR2ftv/R4h9YVbuT7E6SuuR5/+KSl2w57Q/955sva/9FAABgKQ899NCPxhgvO9f3LxnPVfX7SY6NMR6qqutOLs/YdDRe+9XCGPuS7EuSSzdtG5tu+ZPT3nRw786lxgMAgLaq+tvlvL9z5PnaJP+mqm5I8rwk/zALR6Ivr6qN09HnLUmenLY/kuTKJEeqamOSy5L8eDlDAgDA+WDJc57HGO8ZY2wZY2xNcnOSL44x/l2SLyX5g2mzW5LcMz2+d3qe6fUvjjFOO/IMAADrzXKu8/xHSf6wqg5l4ZzmO6f1O5O8ZFr/wyR7ljciAACcH7r/YDBJMsb4cpIvT4+/l+TqGdv8XZKbVmA2AAA4r7jDIAAANIlnAABoEs8AANAkngEAoEk8AwBAk3gGAIAm8QwAAE3iGQAAmsQzAAA0iWcAAGgSzwAA0CSeAQCgSTwDAECTeAYAgCbxDAAATeIZAACaxDMAADSJZwAAaBLPAADQJJ4BAKBJPAMAQJN4BgCAJvEMAABN4hkAAJrEMwAANIlnAABoEs8AANAkngEAoEk8AwBAk3gGAIAm8QwAAE3iGQAAmsQzAAA0iWcAAGgSzwAA0CSeAQCgSTwDAECTeAYAgCbxDAAATeIZAACaxDMAADSJZwAAaBLPAADQJJ4BAKBJPAMAQJN4BgCAJvEMAABN4hkAAJrEMwAANIlnAABoEs8AANAkngEAoEk8AwBAk3gGAIAm8QwAAE3iGQAAmsQzAAA0iWcAAGgSzwAA0CSeAQCgSTwDAECTeAYAgCbxDAAATeIZAACaxDMAADSJZwAAaBLPAADQJJ4BAKBJPAMAQJN4BgCAJvEMAABN4hkAAJrEMwAANC0Zz1X1vKr6elX9dVU9VlV/PK1/rKq+X1UPT1/bp/Wqqo9U1aGqeqSqXrvafwkAAFgLGxvbPJPkdWOMX1TVJUm+WlX/Y3rtP4wxPnPK9m9Msm36+u0kd0zfAQBgXVvyyPNY8Ivp6SXT13iOt+xK8vHpfV9LcnlVbVr+qAAAMF+tc56rakNVPZzkWJL7xxgPTi99YDo14/aqunRa25zkiUVvPzKtnfozd1fVwao6eOLp48v4KwAAwNpoxfMY48QYY3uSLUmurqp/luQ9Sf5pkn+Z5MVJ/mjavGb9iBk/c98YY8cYY8eG5192TsMDAMBaOqurbYwxfprky0muH2McnU7NeCbJf0ty9bTZkSRXLnrbliRPrsCsAAAwV52rbbysqi6fHv96kt9N8jcnz2OuqkpyY5JHp7fcm+St01U3rklyfIxxdFWmBwCANdS52samJPurakMWYvvuMcYXquqLVfWyLJym8XCSfz9tf1+SG5IcSvJ0kret/NgAALD2loznMcYjSV4zY/11Z9h+JLlt+aMBAMD5xR0GAQCgSTwDAECTeAYAgCbxDAAATeIZAACaxDMAADSJZwAAaBLPAADQJJ4BAKBJPAMAQJN4BgCAJvEMAABN4hkAAJrEMwAANIlnAABoEs8AANAkngEAoEk8AwBAk3gGAIAm8QwAAE3iGQAAmsQzAAA0iWcAAGgSzwAA0CSeAQCgSTwDAECTeAYAgCbxDAAATeIZAACaxDMAADSJZwAAaBLPAADQJJ4BAKBJPAMAQJN4BgCAJvEMAABN4hkAAJrEMwAANIlnAABoEs8AANAkngEAoEk8AwBAk3gGAIAm8QwAAE3iGQAAmsQzAAA0iWcAAGgSzwAA0CSeAQCgSTwDAECTeAYAgCbxDAAATeIZAACaxDMAADSJZwAAaBLPAADQJJ4BAKBJPAMAQJN4BgCAJvEMAABN4hkAAJrEMwAANIlnAABoEs8AANAkngEAoEk8AwBAk3gGAIAm8QwAAE3iGQAAmsQzAAA0iWcAAGgSzwAA0LRkPFfV86rq61X111X1WFX98bR+VVU9WFXfrapPV9WvTeuXTs8PTa9vXd2/AgAArI3OkednkrxujPFbSbYnub6qrknywSS3jzG2JflJklun7W9N8pMxxm8muX3aDgAA1r0l43ks+MX09JLpayR5XZLPTOv7k9w4Pd41Pc/0+uurqlZsYgAAmJPWOc9VtaGqHk5yLMn9Sf53kp+OMZ6dNjmSZPP0eHOSJ5Jkev14kpes5NAAADAPrXgeY5wYY2xPsiXJ1UleOWuz6fuso8zj1IWq2l1VB6vq4Imnj3fnBQCAuTmrq22MMX6a5MtJrklyeVVtnF7akuTJ6fGRJFcmyfT6ZUl+PONn7Rtj7Bhj7Njw/MvObXoAAFhDnattvKyqLp8e/3qS303yeJIvJfmDabNbktwzPb53ep7p9S+OMU478gwAAOvNxqU3yaYk+6tqQxZi++4xxheq6ttJPlVV/ynJXyW5c9r+ziT/vaoOZeGI882rMDcAAKy5JeN5jPFIktfMWP9eFs5/PnX975LctCLTAQDAecQdBgEAoEk8AwBAk3gGAIAm8QwAAE3iGQAAmsQzAAA0iWcAAGgSzwAA0CSeAQCgSTwDAECTeAYAgCbxDAAATeIZAACaxDMAADSJZwAAaBLPAADQJJ4BAKBJPAMAQJN4BgCAJvEMAABN4hkAAJrEMwAANG2c9wD8fVv3HJi5fnjvzjWeBACAUznyDAAATeIZAACaxDMAADSJZwAAaBLPAADQJJ4BAKBJPAMAQJN4BgCAJvEMAABN4hkAAJrEMwAANIlnAABoEs8AANAkngEAoEk8AwBAk3gGAIAm8QwAAE3iGQAAmsQzAAA0iWcAAGgSzwAA0CSeAQCgSTwDAECTeAYAgCbxDAAATeIZAACaxDMAADSJZwAAaBLPAADQJJ4BAKBJPAMAQJN4BgCAJvEMAABN4hkAAJrEMwAANIlnAABoEs8AANC0cd4DPJetew6ctnZ47845TAIAAI48AwBAm3gGAIAm8QwAAE3iGQAAmsQzAAA0iWcAAGgSzwAA0CSeAQCgSTwDAECTeAYAgCbxDAAATeIZAACaloznqrqyqr5UVY9X1WNV9c5p/f1V9cOqenj6umHRe95TVYeq6jtV9YbV/AsAAMBa2djY5tkk7x5jfLOqXpjkoaq6f3rt9jHGf168cVW9KsnNSV6d5B8l+V9V9Y/HGCdWcnAAAFhrSx55HmMcHWN8c3r88ySPJ9n8HG/ZleRTY4xnxhjfT3IoydUrMSwAAMzTWZ3zXFVbk7wmyYPT0juq6pGququqXjStbU7yxKK3HcmM2K6q3VV1sKoOnnj6+FkPDgAAa60dz1X1giSfTfKuMcbPktyR5BVJtic5muRDJzed8fZx2sIY+8YYO8YYOzY8/7KzHhwAANZaK56r6pIshPMnxhifS5IxxlNjjBNjjF8m+Wh+dWrGkSRXLnr7liRPrtzIAAAwH52rbVSSO5M8Psb48KL1TYs2e1OSR6fH9ya5uaouraqrkmxL8vWVGxkAAOajc7WNa5O8Jcm3qurhae29Sd5cVduzcErG4SRvT5IxxmNVdXeSb2fhSh23udIGAAAXgiXjeYzx1cw+j/m+53jPB5J8YBlzXVC27jkwc/3w3p1rPAkAAMvhDoMAANAkngEAoEk8AwBAk3gGAIAm8QwAAE3iGQAAmsQzAAA0iWcAAGgSzwAA0CSeAQCgSTwDAECTeAYAgCbxDAAATeIZAACaxDMAADSJZwAAaBLPAADQJJ4BAKBJPAMAQJN4BgCAJvEMAABN4hkAAJrEMwAANIlnAABoEs8AANAkngEAoEk8AwBAk3gGAIAm8QwAAE3iGQAAmsQzAAA0iWcAAGgSzwAA0CSeAQCgSTwDAECTeAYAgCbxDAAATeIZAACaxDMAADSJZwAAaBLPAADQJJ4BAKBJPAMAQJN4BgCAJvEMAABN4hkAAJrEMwAANIlnAABoEs8AANAkngEAoEk8AwBA08Z5D3Ax27rnwLxHAADgLDjyDAAATeIZAACaxDMAADSJZwAAaBLPAADQJJ4BAKDJpepWkEvPAQBc2Bx5BgCAJvEMAABN4hkAAJrEMwAANIlnAABoEs8AANAkngEAoEk8AwBAk3gGAIAm8QwAAE3iGQAAmsQzAAA0bZz3AOvV1j0H5j0CAABrbMkjz1V1ZVV9qaoer6rHquqd0/qLq+r+qvru9P1F03pV1Ueq6lBVPVJVr13tvwQAAKyFzmkbzyZ59xjjlUmuSXJbVb0qyZ4kD4wxtiV5YHqeJG9Msm362p3kjhWfGgAA5mDJeB5jHB1jfHN6/PMkjyfZnGRXkv3TZvuT3Dg93pXk42PB15JcXlWbVnxyAABYY2f1DwaramuS1yR5MMkVY4yjyUJgJ3n5tNnmJE8setuRaQ0AANa1djxX1QuSfDbJu8YYP3uuTWesjRk/b3dVHayqgyeePt4dAwAA5qZ1tY2quiQL4fyJMcbnpuWnqmrTGOPodFrGsWn9SJIrF719S5InT/2ZY4x9SfYlyaWbtp0W1+cLV9UAAOCkztU2KsmdSR4fY3x40Uv3JrllenxLknsWrb91uurGNUmOnzy9AwAA1rPOkedrk7wlybeq6uFp7b1J9ia5u6puTfKDJDdNr92X5IYkh5I8neRtKzoxAADMyZLxPMb4amafx5wkr5+x/Uhy2zLnAgCA8447DC7i/GYAAJ7LRRnPIhkAgHNxVtd5BgCAi5l4BgCAJvEMAABN4hkAAJrEMwAANIlnAABoEs8AANAkngEAoEk8AwBA07q7w+CZ7g54eO/ONZ4EAICLjSPPAADQJJ4BAKBJPAMAQJN4BgCAJvEMAABN4hkAAJrEMwAANIlnAABoEs8AANAkngEAoEk8AwBAk3gGAIAm8QwAAE3iGQAAmsQzAAA0iWcAAGgSzwAA0CSeAQCgSTwDAECTeAYAgCbxDAAATeIZAACaxDMAADSJZwAAaBLPAADQJJ4BAKBJPAMAQJN4BgCAJvEMAABN4hkAAJrEMwAANIlnAABoEs8AANAkngEAoEk8AwBAk3gGAIAm8QwAAE3iGQAAmjbOe4DVtnXPgXmPAADABcKRZwAAaBLPAADQJJ4BAKBJPAMAQJN4BgCAJvEMAABN4hkAAJrEMwAANIlnAABoumDuMOhOggAArDZHngEAoEk8AwBAk3gGAIAm8QwAAE3iGQAAmsQzAAA0iWcAAGgSzwAA0CSeAQCg6YK5w+CFbtYdFA/v3TmHSQAALl6OPAMAQJN4BgCApiXjuaruqqpjVfXoorX3V9UPq+rh6euGRa+9p6oOVdV3quoNqzU4AACstc6R548luX7G+u1jjO3T131JUlWvSnJzkldP7/nTqtqwUsMCAMA8LRnPY4yvJPlx8+ftSvKpMcYzY4zvJzmU5OplzAcAAOeN5Zzz/I6qemQ6reNF09rmJE8s2ubItHaaqtpdVQer6uCJp48vYwwAAFgb5xrPdyR5RZLtSY4m+dC0XjO2HbN+wBhj3xhjxxhjx4bnX3aOYwAAwNo5p3geYzw1xjgxxvhlko/mV6dmHEly5aJNtyR5cnkjAgDA+eGc4rmqNi16+qYkJ6/EcW+Sm6vq0qq6Ksm2JF9f3ogAAHB+WPIOg1X1ySTXJXlpVR1J8r4k11XV9iycknE4yduTZIzxWFXdneTbSZ5NctsY48TqjA4AAGtryXgeY7x5xvKdz7H9B5J8YDlDAQDA+cgdBgEAoEk8AwBAk3gGAIAm8QwAAE3iGQAAmsQzAAA0iWcAAGgSzwAA0CSeAQCgSTwDAECTeAYAgCbxDAAATeIZAACaxDMAADSJZwAAaBLPAADQJJ4BAKBJPAMAQJN4BgCAJvEMAABN4hkAAJrEMwAANIlnAABoEs8AANAkngEAoEk8AwBAk3gGAIAm8QwAAE3iGQAAmsQzAAA0iWcAAGgSzwAA0CSeAQCgSTwDAECTeAYAgCbxDAAATeIZAACaxDMAADSJZwAAaBLPAADQJJ4BAKBJPAMAQJN4BgCAJvEMAABN4hkAAJrEMwAANIlnAABoEs8AANAkngEAoEk8AwBAk3gGAIAm8QwAAE3iGQAAmsQzAAA0iWcAAGgSzwAA0CSeAQCgSTwDAECTeAYAgCbxDAAATeIZAACaxDMAADSJZwAAaBLPAADQJJ4BAKBJPAMAQJN4BgCAJvEMAABN4hkAAJrEMwAANIlnAABo2jjvAVh5W/ccOG3t8N6dc5gEAODCsuSR56q6q6qOVdWji9ZeXFX3V9V3p+8vmtarqj5SVYeq6pGqeu1qDg8AAGupc9rGx5Jcf8raniQPjDG2JXlgep4kb0yybfraneSOlRkTAADmb8l4HmN8JcmPT1nelWT/9Hh/khsXrX98LPhaksuratNKDQsAAPN0rv9g8IoxxtEkmb6/fFrfnOSJRdsdmdYAAGDdW+mrbdSMtTFzw6rdVXWwqg6eePr4Co8BAAAr71zj+amTp2NM349N60eSXLlouy1Jnpz1A8YY+8YYO8YYOzY8/7JzHAMAANbOucbzvUlumR7fkuSeRetvna66cU2S4ydP7wAAgPVuyes8V9Unk1yX5KVVdSTJ+5LsTXJ3Vd2a5AdJbpo2vy/JDUkOJXk6ydtWYWYAAJiLJeN5jPHmM7z0+hnbjiS3LXcoAAA4H7k9NwAANLk99zo26zbcAACsHkeeAQCgSTwDAECTeAYAgCbxDAAATeIZAACaxDMAADSJZwAAaHKd54vEma4JfXjvzjWeBABg/XLkGQAAmsQzAAA0iWcAAGgSzwAA0CSeAQCgSTwDAECTeAYAgCbxDAAATeIZAACaxDMAADSJZwAAaBLPAADQJJ4BAKBJPAMAQJN4BgCAJvEMAABN4hkAAJrEMwAANIlnAABoEs8AANAkngEAoEk8AwBA08Z5D8D5aeueA6etHd67cw6TAACcPxx5BgCAJvEMAABN4hkAAJrEMwAANIlnAABoEs8AANAkngEAoEk8AwBAk3gGAIAm8QwAAE3iGQAAmsQzAAA0iWcAAGgSzwAA0CSeAQCgSTwDAECTeAYAgKaN8x6A+dq658C8RwAAWDcceQYAgCbxDAAATeIZAACaxDMAADSJZwAAaBLPAADQJJ4BAKBJPAMAQJN4BgCAJvEMAABN4hkAAJrEMwAANIlnAABoEs8AANAkngEAoGnjvAdg/di658DM9cN7dy5rWwCA9cKRZwAAaBLPAADQJJ4BAKBJPAMAQJN4BgCAJvEMAABNy7pUXVUdTvLzJCeSPDvG2FFVL07y6SRbkxxO8m/HGD9Z3pgAADB/K3Hk+XfGGNvHGDum53uSPDDG2Jbkgek5AACse6tx2sauJPunx/uT3LgKfwYAAKy55cbzSPKXVfVQVe2e1q4YYxxNkun7y2e9sap2V9XBqjp44unjyxwDAABW33Jvz33tGOPJqnp5kvur6m+6bxxj7EuyL0ku3bRtLHMOAABYdcs68jzGeHL6fizJ55NcneSpqtqUJNP3Y8sdEgAAzgfnHM9V9RtV9cKTj5P8XpJHk9yb5JZps1uS3LPcIQEA4HywnNM2rkjy+ao6+XP+fIzxF1X1jSR3V9WtSX6Q5KbljwkAAPN3zvE8xvhekt+asf5/krx+OUOxvmzdc2DeIwAArAl3GAQAgCbxDAAATeIZAACaxDMAADSJZwAAaBLPAADQJJ4BAKBJPAMAQJN4BgCAJvEMAABN4hkAAJrEMwAANIlnAABoEs8AANAkngEAoEk8AwBAk3gGAIAm8QwAAE3iGQAAmjbOewAuLlv3HJi5fnjvzjWeBADg7IlnzguzolpQAwDnG6dtAABAk3gGAIAm8QwAAE3iGQAAmsQzAAA0iWcAAGgSzwAA0CSeAQCgSTwDAECTeAYAgCbxDAAATRvnPQCcydY9B2auH967c40nAQBY4MgzAAA0iWcAAGgSzwAA0CSeAQCgSTwDAECTeAYAgCbxDAAATeIZAACaxDMAADSJZwAAaBLPAADQJJ4BAKBp47wHgLO1dc+B09YO7905h0kAgIuNI88AANAkngEAoEk8AwBAk3gGAIAm8QwAAE3iGQAAmsQzAAA0iWcAAGgSzwAA0CSeAQCgSTwDAECTeAYAgKaN8x4AVsLWPQdmrh/eu3ONJwEALmTimQvarKgW1ADAuXLaBgAANIlnAABoEs8AANAkngEAoEk8AwBAk3gGAIAml6rjouOa0ADAuXLkGQAAmsQzAAA0iWcAAGgSzwAA0CSeAQCgSTwDAEDTql2qrqquT/JfkmxI8mdjjL2r9WfB+WLWZfDOdAk8l8wDgPVnVeK5qjYk+a9J/nWSI0m+UVX3jjG+vRp/HqyEM8Xs+fpzAYC1t1qnbVyd5NAY43tjjP+b5FNJdq3SnwUAAGtitU7b2JzkiUXPjyT57cUbVNXuJLunp8/87Qd//9FVmoX166VJfjTvIdZafXDeE5z3Lsr9giXZL5jFfsEs/2Q5b16teK4Za+PvPRljX5J9SVJVB8cYO1ZpFtYp+wWz2C+YxX7BLPYLZqmqg8t5/2qdtnEkyZWLnm9J8uQq/VkAALAmViuev5FkW1VdVVW/luTmJPeu0p8FAABrYlVO2xhjPFtV70jyP7Nwqbq7xhiPPcdb9q3GHKx79gtmsV8wi/2CWewXzLKs/aLGGEtvBQAAuMMgAAB0iWcAAGiaezxX1fVV9Z2qOlRVe+Y9D/NTVYer6ltV9fDJy8hU1Yur6v6q+u70/UXznpPVVVV3VdWxqnp00drM/aAWfGT6/Hikql47v8lZTWfYL95fVT+cPjMerqobFr32nmm/+E5VvWE+U7OaqurKqvpSVT1eVY9V1TundZ8XF7Hn2C9W7PNirvG86Dbeb0zyqiRvrqpXzXMm5u53xhjbF12Xc0+SB8YY25I8MD3nwvaxJNefsnam/eCNSbZNX7uT3LFGM7L2PpbT94skuX36zNg+xrgvSab/jtyc5NXTe/50+u8NF5Znk7x7jPHKJNckuW36397nxcXtTPtFskKfF/M+8uw23ixlV5L90+P9SW6c4yysgTHGV5L8+JTlM+0Hu5J8fCz4WpLLq2rT2kzKWjrDfnEmu5J8aozxzBjj+0kOZeG/N1xAxhhHxxjfnB7/PMnjWbjDsc+Li9hz7BdnctafF/OO51m38X6uvyAXtpHkL6vqoen27UlyxRjjaLLwf4gkL5/bdMzTmfYDnyG8Y/oV/F2LTuuyX1xkqmprktckeTA+L5icsl8kK/R5Me94XvI23lxUrh1jvDYLv1q7rar+1bwH4rznM+TidkeSVyTZnuRokg9N6/aLi0hVvSDJZ5O8a4zxs+fadMaa/eICNWO/WLHPi3nHs9t48/+NMZ6cvh9L8vks/NrkqZO/Vpu+H5vfhMzRmfYDnyEXsTHGU2OME2OMXyb5aH71q1b7xUWiqi7JQiB9YozxuWnZ58VFbtZ+sZKfF/OOZ7fxJklSVb9RVS88+TjJ7yV5NAv7wy3TZrckuWc+EzJnZ9oP7k3y1ulf0V+T5PjJX9dy4TvlfNU3ZeEzI1nYL26uqkur6qos/AOxr6/1fKyuqqokdyZ5fIzx4UUv+by4iJ1pv1jJz4tVuT131zncxpsL1xVJPr+wz2djkj8fY/xFVX0jyd1VdWuSHyS5aY4zsgaq6pNJrkvy0qo6kuR9SfZm9n5wX5IbsvAPPJ5O8rY1H5g1cYb94rqq2p6FX7EeTvL2JBljPFZVdyf5dhb+5f1tY4wT85ibVXVtkrck+VZVPTytvTc+Ly52Z9ov3rxSnxduzw0AAE3zPm0DAADWDfEMAABN4hkAAJrEMwAANIlnAABoEs8AANAkngEAoOn/AbcptavOjgYqAAAAAElFTkSuQmCC\n",
      "text/plain": [
       "<Figure size 864x864 with 1 Axes>"
      ]
     },
     "metadata": {
      "needs_background": "light"
     },
     "output_type": "display_data"
    },
    {
     "data": {
      "image/png": "iVBORw0KGgoAAAANSUhEUgAAAs8AAAKvCAYAAACVhiLtAAAABHNCSVQICAgIfAhkiAAAAAlwSFlzAAALEgAACxIB0t1+/AAAADh0RVh0U29mdHdhcmUAbWF0cGxvdGxpYiB2ZXJzaW9uMy4xLjMsIGh0dHA6Ly9tYXRwbG90bGliLm9yZy+AADFEAAAd/UlEQVR4nO3dbYyl513f8d+/u8YhkNp5lmtb2gi2LYGKTbo1liJVIaHg2FVtJFI5qhIrcrVUcqQgUMuGN4DUSItUMI1ULBmcxqmAYAFRLOxSXCcR4kUe1sE4dkyUbbKNF1u2aBITZJHKy78v5t5msGc9f+88nH34fKTRnHOd+8xcq9w5/uqa69ynujsAAMDm/t6qJwAAAOcK8QwAAEPiGQAAhsQzAAAMiWcAABgSzwAAMDSO56raU1V/WlV/sNx/XVV9uqq+VFW/U1XfsYxfvNw/tjy+b2emDgAAu+vFrDy/N8mj6+7/UpJbu3t/kq8nuXkZvznJ17v7e5PcuhwHAADnvFE8V9UVSa5L8hvL/UryliS/uxxyZ5IbltvXL/ezPP7W5XgAADin7R0e96tJ/kOSly33X5nkG9397HL/RJLLl9uXJ3ksSbr72ap6ejn+L9f/wKo6lORQktRFL/mnF73yiuf90n9y+SXjfwgAAGzmgQce+MvufvWZPn/TeK6qf5nkqe5+oKrefGp4g0N78Ni3B7pvT3J7klx82f6+7KZffd6Tjh65brPpAQDAWFX97608f7Ly/KYk/6qqrk3ykiR/P2sr0ZdW1d5l9fmKJI8vx59IcmWSE1W1N8klSb62lUkCAMDZYNM9z939vu6+orv3Jbkxyce7+98k+USSn1gOuynJx5bbdy/3szz+8e5+3sozAACca7ZyneefTfLTVXUsa3ua71jG70jyymX8p5Mc3toUAQDg7DB9w2CSpLs/meSTy+0vJ7lqg2P+Jsnbt2FuAABwVvEJgwAAMCSeAQBgSDwDAMCQeAYAgCHxDAAAQ+IZAACGxDMAAAyJZwAAGBLPAAAwJJ4BAGBIPAMAwJB4BgCAIfEMAABD4hkAAIbEMwAADIlnAAAYEs8AADAkngEAYEg8AwDAkHgGAIAh8QwAAEPiGQAAhsQzAAAMiWcAABgSzwAAMCSeAQBgSDwDAMCQeAYAgCHxDAAAQ+IZAACGxDMAAAyJZwAAGBLPAAAwJJ4BAGBIPAMAwJB4BgCAIfEMAABD4hkAAIbEMwAADIlnAAAYEs8AADAkngEAYEg8AwDAkHgGAIAh8QwAAEPiGQAAhsQzAAAMiWcAABgSzwAAMCSeAQBgSDwDAMCQeAYAgCHxDAAAQ+IZAACGxDMAAAyJZwAAGBLPAAAwJJ4BAGBIPAMAwJB4BgCAIfEMAABD4hkAAIbEMwAADIlnAAAYEs8AADAkngEAYEg8AwDAkHgGAIAh8QwAAEPiGQAAhsQzAAAMiWcAABgSzwAAMLRpPFfVS6rqM1X1Z1X1SFX94jL+oar6SlU9uHwdWMarqj5QVceq6qGqeuNO/yMAAGA37B0c860kb+nuv66qi5L8SVX99+Wxf9/dv/uc49+WZP/y9UNJblu+AwDAOW3Tlede89fL3YuWr36Bp1yf5MPL8z6V5NKqumzrUwUAgNUa7Xmuqj1V9WCSp5Lc192fXh56/7I149aqungZuzzJY+uefmIZe+7PPFRVR6vq6Mlnnt7CPwEAAHbHKJ67+2R3H0hyRZKrquoHkrwvyT9O8s+SvCLJzy6H10Y/YoOfeXt3H+zug3teeskZTR4AAHbTi7raRnd/I8knk1zT3U8sWzO+leS/JrlqOexEkivXPe2KJI9vw1wBAGClJlfbeHVVXbrc/s4kP5Lkz0/tY66qSnJDkoeXp9yd5F3LVTeuTvJ0dz+xI7MHAIBdNLnaxmVJ7qyqPVmL7bu6+w+q6uNV9eqsbdN4MMm/W46/N8m1SY4leSbJu7d/2gAAsPs2jefufijJGzYYf8tpju8kt2x9agAAcHbxCYMAADAkngEAYEg8AwDAkHgGAIAh8QwAAEPiGQAAhsQzAAAMiWcAABgSzwAAMCSeAQBgSDwDAMCQeAYAgCHxDAAAQ+IZAACGxDMAAAyJZwAAGBLPAAAwJJ4BAGBIPAMAwJB4BgCAIfEMAABD4hkAAIbEMwAADIlnAAAYEs8AADAkngEAYEg8AwDAkHgGAIAh8QwAAEPiGQAAhsQzAAAMiWcAABgSzwAAMCSeAQBgSDwDAMCQeAYAgCHxDAAAQ+IZAACGxDMAAAyJZwAAGBLPAAAwtHfVE3gh+w7f87yx40euW8FMAADAyjMAAIyJZwAAGBLPAAAwJJ4BAGBIPAMAwJB4BgCAIfEMAABD4hkAAIbEMwAADIlnAAAYEs8AADAkngEAYEg8AwDAkHgGAIAh8QwAAEPiGQAAhsQzAAAMiWcAABgSzwAAMCSeAQBgSDwDAMCQeAYAgCHxDAAAQ+IZAACGxDMAAAyJZwAAGBLPAAAwJJ4BAGBIPAMAwJB4BgCAoU3juapeUlWfqao/q6pHquoXl/HXVdWnq+pLVfU7VfUdy/jFy/1jy+P7dvafAAAAu2Oy8vytJG/p7h9MciDJNVV1dZJfSnJrd+9P8vUkNy/H35zk6939vUluXY4DAIBz3qbx3Gv+erl70fLVSd6S5HeX8TuT3LDcvn65n+Xxt1ZVbduMAQBgRUZ7nqtqT1U9mOSpJPcl+V9JvtHdzy6HnEhy+XL78iSPJcny+NNJXrmdkwYAgFUYxXN3n+zuA0muSHJVku/b6LDl+0arzP3cgao6VFVHq+royWeens4XAABW5kVdbaO7v5Hkk0muTnJpVe1dHroiyePL7RNJrkyS5fFLknxtg591e3cf7O6De156yZnNHgAAdtHkahuvrqpLl9vfmeRHkjya5BNJfmI57KYkH1tu373cz/L4x7v7eSvPAABwrtm7+SG5LMmdVbUna7F9V3f/QVV9IclHquo/JvnTJHcsx9+R5L9V1bGsrTjfuAPzBgCAXbdpPHf3Q0nesMH4l7O2//m543+T5O3bMjsAADiL+IRBAAAYEs8AADAkngEAYEg8AwDAkHgGAIAh8QwAAEPiGQAAhsQzAAAMiWcAABgSzwAAMCSeAQBgSDwDAMCQeAYAgCHxDAAAQ+IZAACGxDMAAAyJZwAAGBLPAAAwJJ4BAGBIPAMAwJB4BgCAIfEMAABD4hkAAIbEMwAADIlnAAAYEs8AADAkngEAYEg8AwDAkHgGAIAh8QwAAEPiGQAAhsQzAAAMiWcAABgSzwAAMCSeAQBgSDwDAMCQeAYAgCHxDAAAQ+IZAACGxDMAAAyJZwAAGBLPAAAwJJ4BAGBIPAMAwJB4BgCAIfEMAABD4hkAAIbEMwAADIlnAAAYEs8AADAkngEAYEg8AwDAkHgGAIChvauewIu17/A9G44fP3LdLs8EAIALjZVnAAAYEs8AADAkngEAYEg8AwDAkHgGAIAh8QwAAEPiGQAAhsQzAAAMiWcAABgSzwAAMCSeAQBgSDwDAMCQeAYAgCHxDAAAQ+IZAACGxDMAAAyJZwAAGBLPAAAwJJ4BAGBo03iuqiur6hNV9WhVPVJV713Gf6Gq/qKqHly+rl33nPdV1bGq+mJV/dhO/gMAAGC37B0c82ySn+nuz1XVy5I8UFX3LY/d2t3/af3BVfX6JDcm+f4k/yDJ/6yqf9jdJ7dz4gAAsNs2XXnu7ie6+3PL7W8meTTJ5S/wlOuTfKS7v9XdX0lyLMlV2zFZAABYpRe157mq9iV5Q5JPL0PvqaqHquqDVfXyZezyJI+te9qJbBDbVXWoqo5W1dGTzzz9oicOAAC7bRzPVfXdSX4vyU91918luS3J9yQ5kOSJJL986tANnt7PG+i+vbsPdvfBPS+95EVPHAAAdtsonqvqoqyF82929+8nSXc/2d0nu/tvk/x6vr0140SSK9c9/Yokj2/flAEAYDUmV9uoJHckebS7f2Xd+GXrDvvxJA8vt+9OcmNVXVxVr0uyP8lntm/KAACwGpOrbbwpyTuTfL6qHlzGfi7JO6rqQNa2ZBxP8pNJ0t2PVNVdSb6QtSt13OJKGwAAnA82jefu/pNsvI/53hd4zvuTvH8L8wIAgLOOTxgEAIAh8QwAAEPiGQAAhsQzAAAMiWcAABgSzwAAMCSeAQBgSDwDAMCQeAYAgCHxDAAAQ+IZAACGxDMAAAyJZwAAGBLPAAAwJJ4BAGBIPAMAwJB4BgCAIfEMAABD4hkAAIbEMwAADIlnAAAYEs8AADAkngEAYEg8AwDAkHgGAIAh8QwAAEPiGQAAhsQzAAAMiWcAABgSzwAAMCSeAQBgSDwDAMCQeAYAgCHxDAAAQ+IZAACGxDMAAAyJZwAAGBLPAAAwJJ4BAGBIPAMAwJB4BgCAIfEMAABD4hkAAIbEMwAADIlnAAAYEs8AADAkngEAYEg8AwDAkHgGAIAh8QwAAEPiGQAAhvauegL8XfsO37Ph+PEj1+3yTAAAeC4rzwAAMCSeAQBgSDwDAMCQeAYAgCHxDAAAQ+IZAACGxDMAAAyJZwAAGBLPAAAwJJ4BAGBIPAMAwJB4BgCAIfEMAABD4hkAAIbEMwAADIlnAAAYEs8AADAkngEAYEg8AwDA0N5VT2AV9h2+Z8Px40eu2+WZAABwLtl05bmqrqyqT1TVo1X1SFW9dxl/RVXdV1VfWr6/fBmvqvpAVR2rqoeq6o07/Y8AAIDdMNm28WySn+nu70tydZJbqur1SQ4nub+79ye5f7mfJG9Lsn/5OpTktm2fNQAArMCm8dzdT3T355bb30zyaJLLk1yf5M7lsDuT3LDcvj7Jh3vNp5JcWlWXbfvMAQBgl72oNwxW1b4kb0jy6SSv7e4nkrXATvKa5bDLkzy27mknljEAADinjd8wWFXfneT3kvxUd/9VVZ320A3GeoOfdyhr2zqy5++/ejqNs5o3IgIAnN9GK89VdVHWwvk3u/v3l+EnT23HWL4/tYyfSHLluqdfkeTx5/7M7r69uw9298E9L73kTOcPAAC7ZnK1jUpyR5JHu/tX1j10d5Kblts3JfnYuvF3LVfduDrJ06e2dwAAwLlssm3jTUnemeTzVfXgMvZzSY4kuauqbk7y1SRvXx67N8m1SY4leSbJu7d1xqdhywQAADtt03ju7j/JxvuYk+StGxzfSW7Z4rwAAOCs4+O5AQBgSDwDAMCQeAYAgCHxDAAAQ+IZAACGxDMAAAyNP56bv+t015UGAOD8ZeUZAACGxDMAAAyJZwAAGBLPAAAwJJ4BAGBIPAMAwJB4BgCAIfEMAABD4hkAAIZ8wuAmfJIgAACnWHkGAIAh8QwAAEPiGQAAhsQzAAAMiWcAABg676+24WoZAABsFyvPAAAwJJ4BAGBIPAMAwJB4BgCAIfEMAABD4hkAAIbEMwAADIlnAAAYEs8AADAkngEAYEg8AwDAkHgGAIAh8QwAAEPiGQAAhsQzAAAMiWcAABgSzwAAMCSeAQBgSDwDAMCQeAYAgCHxDAAAQ+IZAACGxDMAAAyJZwAAGBLPAAAwtHfVEzib7Dt8z6qnAADAWczKMwAADIlnAAAYEs8AADBkz/MuON1e6uNHrtvlmQAAsBVWngEAYEg8AwDAkHgGAIAh8QwAAEPiGQAAhsQzAAAMiWcAABgSzwAAMCSeAQBgSDwDAMCQeAYAgCHxDAAAQ+IZAACGxDMAAAyJZwAAGBLPAAAwJJ4BAGBIPAMAwJB4BgCAIfEMAABDm8ZzVX2wqp6qqofXjf1CVf1FVT24fF277rH3VdWxqvpiVf3YTk0cAAB222Tl+UNJrtlg/NbuPrB83ZskVfX6JDcm+f7lOb9WVXu2a7IAALBKm8Zzd/9xkq8Nf971ST7S3d/q7q8kOZbkqi3MDwAAzhpb2fP8nqp6aNnW8fJl7PIkj6075sQy9jxVdaiqjlbV0ZPPPL2FaQAAwO4403i+Lcn3JDmQ5Ikkv7yM1wbH9kY/oLtv7+6D3X1wz0svOcNpAADA7jmjeO7uJ7v7ZHf/bZJfz7e3ZpxIcuW6Q69I8vjWpggAAGeHM4rnqrps3d0fT3LqShx3J7mxqi6uqtcl2Z/kM1ubIgAAnB32bnZAVf12kjcneVVVnUjy80neXFUHsrYl43iSn0yS7n6kqu5K8oUkzya5pbtP7szUAQBgd20az939jg2G73iB49+f5P1bmRQAAJyNfMIgAAAMiWcAABgSzwAAMCSeAQBgSDwDAMCQeAYAgCHxDAAAQ5te55mds+/wPaueAgAAL4KVZwAAGBLPAAAwJJ4BAGBIPAMAwJB4BgCAIfEMAABD4hkAAIbEMwAADIlnAAAYEs8AADAkngEAYEg8AwDAkHgGAIAh8QwAAEN7Vz0BZvYdvud5Y8ePXLeCmQAAXLisPAMAwJB4BgCAIfEMAABD4hkAAIbEMwAADIlnAAAYEs8AADAkngEAYEg8AwDAkE8YPIdt9KmDiU8eBADYKVaeAQBgSDwDAMCQeAYAgCHxDAAAQ+IZAACGxDMAAAyJZwAAGBLPAAAwJJ4BAGBIPAMAwJB4BgCAIfEMAABD4hkAAIbEMwAADIlnAAAYEs8AADAkngEAYEg8AwDAkHgGAIAh8QwAAEPiGQAAhsQzAAAMiWcAABgSzwAAMCSeAQBgSDwDAMCQeAYAgCHxDAAAQ+IZAACGxDMAAAyJZwAAGBLPAAAwJJ4BAGBIPAMAwJB4BgCAIfEMAABDe1c9AXbHvsP3bDh+/Mh1uzwTAIBzl5VnAAAYEs8AADC0aTxX1Qer6qmqenjd2Cuq6r6q+tLy/eXLeFXVB6rqWFU9VFVv3MnJAwDAbpqsPH8oyTXPGTuc5P7u3p/k/uV+krwtyf7l61CS27ZnmgAAsHqbxnN3/3GSrz1n+Pokdy6370xyw7rxD/eaTyW5tKou267JAgDAKp3pnufXdvcTSbJ8f80yfnmSx9Ydd2IZAwCAc952v2GwNhjrDQ+sOlRVR6vq6Mlnnt7maQAAwPY703h+8tR2jOX7U8v4iSRXrjvuiiSPb/QDuvv27j7Y3Qf3vPSSM5wGAADsnjON57uT3LTcvinJx9aNv2u56sbVSZ4+tb0DAADOdZt+wmBV/XaSNyd5VVWdSPLzSY4kuauqbk7y1SRvXw6/N8m1SY4leSbJu3dgzgAAsBKbxnN3v+M0D711g2M7yS1bnRQAAJyNfMIgAAAMbbryzLln3+F7Vj0FAIDzkpVnAAAYEs8AADAkngEAYEg8AwDAkHgGAIAh8QwAAEPiGQAAhsQzAAAMiWcAABgSzwAAMCSeAQBgSDwDAMCQeAYAgCHxDAAAQ+IZAACGxDMAAAyJZwAAGBLPAAAwJJ4BAGBIPAMAwJB4BgCAIfEMAABD4hkAAIbEMwAADIlnAAAYEs8AADAkngEAYEg8AwDAkHgGAIAh8QwAAEN7Vz0BVmvf4Xs2HD9+5LpdngkAwNnPyjMAAAyJZwAAGBLPAAAwJJ4BAGDIGwbZ0EZvJPQmQgDgQmflGQAAhsQzAAAM2bbBmGtCAwAXOivPAAAwJJ4BAGBIPAMAwJA9z2yZy9oBABcKK88AADAkngEAYEg8AwDAkHgGAIAh8QwAAEPiGQAAhsQzAAAMiWcAABgSzwAAMCSeAQBgSDwDAMCQeAYAgCHxDAAAQ+IZAACGxDMAAAztXfUEuLDsO3zPhuPHj1y3yzMBAHjxrDwDAMCQeAYAgCHbNjgrbLSdw1YOAOBsY+UZAACGrDxz1vLmQgDgbGPlGQAAhsQzAAAMiWcAABgSzwAAMOQNg+yI073ZDwDgXGblGQAAhsQzAAAMbWnbRlUdT/LNJCeTPNvdB6vqFUl+J8m+JMeT/Ovu/vrWpgkAAKu3HSvPP9zdB7r74HL/cJL7u3t/kvuX+wAAcM7biW0b1ye5c7l9Z5IbduB3AADArttqPHeSP6qqB6rq0DL22u5+IkmW76/Z6IlVdaiqjlbV0ZPPPL3FaQAAwM7b6qXq3tTdj1fVa5LcV1V/Pn1id9+e5PYkufiy/b3FeQAAwI7b0spzdz++fH8qyUeTXJXkyaq6LEmW709tdZIAAHA2OON4rqrvqqqXnbqd5EeTPJzk7iQ3LYfdlORjW50kAACcDbaybeO1ST5aVad+zm919x9W1WeT3FVVNyf5apK3b32aAACwemccz9395SQ/uMH4/0ny1q1MCgAAzkY+YRAAAIbEMwAADIlnAAAYEs8AADAkngEAYEg8AwDAkHgGAIAh8QwAAEPiGQAAhsQzAAAMiWcAABgSzwAAMCSeAQBgSDwDAMCQeAYAgCHxDAAAQ+IZAACGxDMAAAyJZwAAGBLPAAAwJJ4BAGBIPAMAwJB4BgCAIfEMAABD4hkAAIbEMwAADIlnAAAYEs8AADAkngEAYEg8AwDAkHgGAIAh8QwAAEPiGQAAhsQzAAAMiWcAABjau+oJwIu17/A9zxs7fuS6FcwEALjQWHkGAIAh8QwAAEPiGQAAhsQzAAAMiWcAABgSzwAAMORSdZwXNrp8XeISdgDA9rLyDAAAQ+IZAACGxDMAAAzZ88x5zUd5AwDbycozAAAMiWcAABgSzwAAMCSeAQBgSDwDAMCQeAYAgCHxDAAAQ+IZAACGxDMAAAyJZwAAGBLPAAAwJJ4BAGBIPAMAwJB4BgCAob2rngDstn2H73lRxx8/ct0OzQQAONdYeQYAgCHxDAAAQ7ZtwCY22uZhKwcAXJisPAMAwJB4BgCAIfEMAABD9jzDGTjd5e7shQaA85t4hhXZ7QD3xkcA2DrbNgAAYMjKM5wDbBMBgLODlWcAABjasZXnqromyX9OsifJb3T3kZ36XXC2ON0K8W7+vt1ejbYqDsCFZEfiuar2JPkvSf5FkhNJPltVd3f3F3bi98H5ZLcD/Gy1HVEu7AHYbju1beOqJMe6+8vd/X+TfCTJ9Tv0uwAAYFdUd2//D636iSTXdPe/Xe6/M8kPdfd71h1zKMmh5e4PJHl42yfCue5VSf5y1ZPgrOO8YCPOCzbivGAj/6i7X3amT96pPc+1wdjfqfTuvj3J7UlSVUe7++AOzYVzlPOCjTgv2Ijzgo04L9hIVR3dyvN3atvGiSRXrrt/RZLHd+h3AQDArtipeP5skv1V9bqq+o4kNya5e4d+FwAA7Iod2bbR3c9W1XuS/I+sXarug939yAs85fadmAfnPOcFG3FesBHnBRtxXrCRLZ0XO/KGQQAAOB/5hEEAABgSzwAAMLTyeK6qa6rqi1V1rKoOr3o+rE5VHa+qz1fVg6cuI1NVr6iq+6rqS8v3l696nuysqvpgVT1VVQ+vG9vwPKg1H1hePx6qqjeububspNOcF79QVX+xvGY8WFXXrnvsfct58cWq+rHVzJqdVFVXVtUnqurRqnqkqt67jHu9uIC9wHmxba8XK43ndR/j/bYkr0/yjqp6/SrnxMr9cHcfWHddzsNJ7u/u/UnuX+5zfvtQkmueM3a68+BtSfYvX4eS3LZLc2T3fSjPPy+S5NblNeNAd9+bJMt/R25M8v3Lc35t+e8N55dnk/xMd39fkquT3LL8b+/14sJ2uvMi2abXi1WvPPsYbzZzfZI7l9t3JrlhhXNhF3T3Hyf52nOGT3ceXJ/kw73mU0kurarLdmem7KbTnBenc32Sj3T3t7r7K0mOZe2/N5xHuvuJ7v7ccvubSR5Ncnm8XlzQXuC8OJ0X/Xqx6ni+PMlj6+6fyAv/Azm/dZI/qqoHlo9vT5LXdvcTydr/IZK8ZmWzY5VOdx54DeE9y5/gP7huW5fz4gJTVfuSvCHJp+P1gsVzzotkm14vVh3Pm36MNxeUN3X3G7P2p7Vbquqfr3pCnPW8hlzYbkvyPUkOJHkiyS8v486LC0hVfXeS30vyU939Vy906AZjzovz1Abnxba9Xqw6nn2MN/9fdz++fH8qyUez9meTJ0/9WW35/tTqZsgKne488BpyAevuJ7v7ZHf/bZJfz7f/1Oq8uEBU1UVZC6Tf7O7fX4a9XlzgNjovtvP1YtXx7GO8SZJU1XdV1ctO3U7yo0keztr5cNNy2E1JPraaGbJipzsP7k7yruVd9FcnefrUn2s5/z1nv+qPZ+01I1k7L26sqour6nVZe4PYZ3Z7fuysqqokdyR5tLt/Zd1DXi8uYKc7L7bz9WJHPp576gw+xpvz12uTfHTtnM/eJL/V3X9YVZ9NcldV3Zzkq0nevsI5sguq6reTvDnJq6rqRJKfT3IkG58H9ya5Nmtv8Hgmybt3fcLsitOcF2+uqgNZ+xPr8SQ/mSTd/UhV3ZXkC1l75/0t3X1yFfNmR70pyTuTfL6qHlzGfi5eLy50pzsv3rFdrxc+nhsAAIZWvW0DAADOGeIZAACGxDMAAAyJZwAAGBLPAAAwJJ4BAGBIPAMAwND/A+QQ1yoe3xHOAAAAAElFTkSuQmCC\n",
      "text/plain": [
       "<Figure size 864x864 with 1 Axes>"
      ]
     },
     "metadata": {
      "needs_background": "light"
     },
     "output_type": "display_data"
    },
    {
     "data": {
      "image/png": "iVBORw0KGgoAAAANSUhEUgAAAs8AAAKvCAYAAACVhiLtAAAABHNCSVQICAgIfAhkiAAAAAlwSFlzAAALEgAACxIB0t1+/AAAADh0RVh0U29mdHdhcmUAbWF0cGxvdGxpYiB2ZXJzaW9uMy4xLjMsIGh0dHA6Ly9tYXRwbG90bGliLm9yZy+AADFEAAAd9klEQVR4nO3dbaxl51nf4f/dGeMQSO28y7UtTQTTlkDFJJ0aS5GqkFBw7Ko2EqkcVYkVuRoqOVIQqGXCF0BqpEEqmEYqlgxO41RAsIAoFnYprpMI8SEv42AcOybKNJnGgy1bNIkJskjl4e6Hs6Y52Gd8bs952fNyXdLR2fvZa+/zHHl5z0/rPHut6u4AAACb+3urngAAAJwrxDMAAAyJZwAAGBLPAAAwJJ4BAGBIPAMAwNA4nqtqT1X9aVX9wXL/dVX16ar6UlX9TlV9xzJ+8XL/2PL4vp2ZOgAA7K4Xc+T5vUkeXXf/l5Lc2t37k3w9yc3L+M1Jvt7d35vk1mU7AAA4543iuaquSHJdkt9Y7leStyT53WWTO5PcsNy+frmf5fG3LtsDAMA5be9wu19N8h+SvGy5/8ok3+juZ5f7J5Jcvty+PMljSdLdz1bV08v2f7n+BavqUJJDSVIXveSfXvTKK573Q//J5ZeMfxEAANjMAw888Jfd/eozff6m8VxV/zLJU939QFW9+dTwBpv24LFvD3TfnuT2JLn4sv192U2/+rwnHT1y3WbTAwCAsar631t5/uTI85uS/KuqujbJS5L8/awdib60qvYuR5+vSPL4sv2JJFcmOVFVe5NckuRrW5kkAACcDTZd89zd7+vuK7p7X5Ibk3y8u/9Nkk8k+Ylls5uSfGy5ffdyP8vjH+/u5x15BgCAc81WzvP8s0l+uqqOZW1N8x3L+B1JXrmM/3SSw1ubIgAAnB2mHxhMknT3J5N8crn95SRXbbDN3yR5+zbMDQAAziquMAgAAEPiGQAAhsQzAAAMiWcAABgSzwAAMCSeAQBgSDwDAMCQeAYAgCHxDAAAQ+IZAACGxDMAAAyJZwAAGBLPAAAwJJ4BAGBIPAMAwJB4BgCAIfEMAABD4hkAAIbEMwAADIlnAAAYEs8AADAkngEAYEg8AwDAkHgGAIAh8QwAAEPiGQAAhsQzAAAMiWcAABgSzwAAMCSeAQBgSDwDAMCQeAYAgCHxDAAAQ+IZAACGxDMAAAyJZwAAGBLPAAAwJJ4BAGBIPAMAwJB4BgCAIfEMAABD4hkAAIbEMwAADIlnAAAYEs8AADAkngEAYEg8AwDAkHgGAIAh8QwAAEPiGQAAhsQzAAAMiWcAABgSzwAAMCSeAQBgSDwDAMCQeAYAgCHxDAAAQ+IZAACGxDMAAAyJZwAAGBLPAAAwJJ4BAGBIPAMAwJB4BgCAIfEMAABD4hkAAIbEMwAADIlnAAAYEs8AADAkngEAYEg8AwDAkHgGAIAh8QwAAEObxnNVvaSqPlNVf1ZVj1TVLy7jH6qqr1TVg8vXgWW8quoDVXWsqh6qqjfu9C8BAAC7Ye9gm28leUt3/3VVXZTkT6rqvy+P/fvu/t3nbP+2JPuXrx9KctvyHQAAzmmbHnnuNX+93L1o+eoXeMr1ST68PO9TSS6tqsu2PlUAAFit0ZrnqtpTVQ8meSrJfd396eWh9y9LM26tqouXscuTPLbu6SeWsee+5qGqOlpVR08+8/QWfgUAANgdo3ju7pPdfSDJFUmuqqofSPK+JP84yT9L8ookP7tsXhu9xAaveXt3H+zug3teeskZTR4AAHbTizrbRnd/I8knk1zT3U8sSzO+leS/Jrlq2exEkivXPe2KJI9vw1wBAGClJmfbeHVVXbrc/s4kP5Lkz0+tY66qSnJDkoeXp9yd5F3LWTeuTvJ0dz+xI7MHAIBdNDnbxmVJ7qyqPVmL7bu6+w+q6uNV9eqsLdN4MMm/W7a/N8m1SY4leSbJu7d/2gAAsPs2jefufijJGzYYf8tptu8kt2x9agAAcHZxhUEAABgSzwAAMCSeAQBgSDwDAMCQeAYAgCHxDAAAQ+IZAACGxDMAAAyJZwAAGBLPAAAwJJ4BAGBIPAMAwJB4BgCAIfEMAABD4hkAAIbEMwAADIlnAAAYEs8AADAkngEAYEg8AwDAkHgGAIAh8QwAAEPiGQAAhsQzAAAMiWcAABgSzwAAMCSeAQBgSDwDAMCQeAYAgCHxDAAAQ+IZAACGxDMAAAyJZwAAGBLPAAAwJJ4BAGBIPAMAwJB4BgCAIfEMAABD4hkAAIbEMwAADIlnAAAYEs8AADAkngEAYEg8AwDAkHgGAIAh8QwAAEPiGQAAhsQzAAAMiWcAABgSzwAAMCSeAQBgSDwDAMCQeAYAgCHxDAAAQ+IZAACGxDMAAAyJZwAAGBLPAAAwJJ4BAGBIPAMAwJB4BgCAIfEMAABD4hkAAIbEMwAADIlnAAAYEs8AADAkngEAYEg8AwDAkHgGAIAh8QwAAEPiGQAAhsQzAAAMbRrPVfWSqvpMVf1ZVT1SVb+4jL+uqj5dVV+qqt+pqu9Yxi9e7h9bHt+3s78CAADsjsmR528leUt3/2CSA0muqaqrk/xSklu7e3+Srye5edn+5iRf7+7vTXLrsh0AAJzzNo3nXvPXy92Llq9O8pYkv7uM35nkhuX29cv9LI+/tapq22YMAAArMlrzXFV7qurBJE8luS/J/0ryje5+dtnkRJLLl9uXJ3ksSZbHn07yyu2cNAAArMIonrv7ZHcfSHJFkquSfN9Gmy3fNzrK3M8dqKpDVXW0qo6efObp6XwBAGBlXtTZNrr7G0k+meTqJJdW1d7loSuSPL7cPpHkyiRZHr8kydc2eK3bu/tgdx/c89JLzmz2AACwiyZn23h1VV263P7OJD+S5NEkn0jyE8tmNyX52HL77uV+lsc/3t3PO/IMAADnmr2bb5LLktxZVXuyFtt3dfcfVNUXknykqv5jkj9Ncsey/R1J/ltVHcvaEecbd2DeAACw6zaN5+5+KMkbNhj/ctbWPz93/G+SvH1bZgcAAGcRVxgEAIAh8QwAAEPiGQAAhsQzAAAMiWcAABgSzwAAMCSeAQBgSDwDAMDQ5AqDK7Pv8D3PGzt+5LoVzAQAABx5BgCAMfEMAABD4hkAAIbEMwAADIlnAAAYEs8AADAkngEAYEg8AwDAkHgGAIAh8QwAAEPiGQAAhsQzAAAMiWcAABgSzwAAMCSeAQBgSDwDAMCQeAYAgCHxDAAAQ+IZAACGxDMAAAyJZwAAGBLPAAAwJJ4BAGBIPAMAwJB4BgCAIfEMAABD4hkAAIbEMwAADIlnAAAYEs8AADAkngEAYEg8AwDAkHgGAIAh8QwAAEPiGQAAhsQzAAAMiWcAABgSzwAAMCSeAQBgSDwDAMCQeAYAgCHxDAAAQ+IZAACGxDMAAAyJZwAAGBLPAAAwJJ4BAGBIPAMAwJB4BgCAIfEMAABD4hkAAIbEMwAADIlnAAAYEs8AADAkngEAYEg8AwDAkHgGAIAh8QwAAEPiGQAAhsQzAAAMiWcAABgSzwAAMCSeAQBgSDwDAMDQpvFcVVdW1Seq6tGqeqSq3ruM/0JV/UVVPbh8XbvuOe+rqmNV9cWq+rGd/AUAAGC37B1s82ySn+nuz1XVy5I8UFX3LY/d2t3/af3GVfX6JDcm+f4k/yDJ/6yqf9jdJ7dz4gAAsNs2PfLc3U909+eW299M8miSy1/gKdcn+Uh3f6u7v5LkWJKrtmOyAACwSi9qzXNV7UvyhiSfXobeU1UPVdUHq+rly9jlSR5b97QT2SC2q+pQVR2tqqMnn3n6RU8cAAB22zieq+q7k/xekp/q7r9KcluS70lyIMkTSX751KYbPL2fN9B9e3cf7O6De156yYueOAAA7LZRPFfVRVkL59/s7t9Pku5+srtPdvffJvn1fHtpxokkV657+hVJHt++KQMAwGpMzrZRSe5I8mh3/8q68cvWbfbjSR5ebt+d5MaquriqXpdkf5LPbN+UAQBgNSZn23hTkncm+XxVPbiM/VySd1TVgawtyTie5CeTpLsfqaq7knwha2fquMWZNgAAOB9sGs/d/SfZeB3zvS/wnPcnef8W5gUAAGcdVxgEAIAh8QwAAEPiGQAAhsQzAAAMTc62cVbZd/ieDcePH7lul2cCAMCFxpFnAAAYEs8AADAkngEAYEg8AwDAkHgGAIAh8QwAAEPiGQAAhsQzAAAMiWcAABgSzwAAMCSeAQBgSDwDAMCQeAYAgCHxDAAAQ+IZAACGxDMAAAyJZwAAGNq76gnwd+07fM+G48ePXLfLMwEA4LnOm3gWnQAA7DTLNgAAYEg8AwDAkHgGAIAh8QwAAEPiGQAAhsQzAAAMiWcAABgSzwAAMCSeAQBgSDwDAMCQeAYAgCHxDAAAQ+IZAACGxDMAAAyJZwAAGBLPAAAwJJ4BAGBIPAMAwJB4BgCAIfEMAABD4hkAAIbEMwAADIlnAAAYEs8AADAkngEAYEg8AwDAkHgGAIAh8QwAAEPiGQAAhsQzAAAMiWcAABgSzwAAMLR31RM4V+07fM/zxo4fuW4FMwEAYLc48gwAAEPiGQAAhsQzAAAMiWcAABgSzwAAMCSeAQBgSDwDAMCQeAYAgCHxDAAAQxfkFQY3ujpg4gqBAAC8MEeeAQBgSDwDAMCQeAYAgCHxDAAAQ+IZAACGNo3nqrqyqj5RVY9W1SNV9d5l/BVVdV9VfWn5/vJlvKrqA1V1rKoeqqo37vQvAQAAu2Fy5PnZJD/T3d+X5Ookt1TV65McTnJ/d+9Pcv9yP0nelmT/8nUoyW3bPmsAAFiBTeO5u5/o7s8tt7+Z5NEklye5Psmdy2Z3JrlhuX19kg/3mk8lubSqLtv2mQMAwC57UWueq2pfkjck+XSS13b3E8laYCd5zbLZ5UkeW/e0E8sYAACc08bxXFXfneT3kvxUd//VC226wVhv8HqHqupoVR09+czT02kAAMDKjOK5qi7KWjj/Znf//jL85KnlGMv3p5bxE0muXPf0K5I8/tzX7O7bu/tgdx/c89JLznT+AACwayZn26gkdyR5tLt/Zd1Ddye5abl9U5KPrRt/13LWjauTPH1qeQcAAJzL9g62eVOSdyb5fFU9uIz9XJIjSe6qqpuTfDXJ25fH7k1ybZJjSZ5J8u5tnTEAAKzIpvHc3X+SjdcxJ8lbN9i+k9yyxXkBAMBZxxUGAQBgSDwDAMCQeAYAgCHxDAAAQ+IZAACGxDMAAAyJZwAAGBLPAAAwNLnCIDtk3+F7Vj0FAABehPM+ngUqAADbxbINAAAYEs8AADAkngEAYOi8X/N8NrDuGgDg/CCet5FIBgA4v1m2AQAAQ+IZAACGLNvYhKUYAACc4sgzAAAMiWcAABgSzwAAMCSeAQBgSDwDAMCQeAYAgCGnqlvHaekAAHghjjwDAMCQeAYAgCHxDAAAQ+IZAACGxDMAAAyJZwAAGBLPAAAwJJ4BAGBIPAMAwJB4BgCAIfEMAABD4hkAAIbEMwAADIlnAAAYEs8AADAkngEAYEg8AwDAkHgGAIAh8QwAAEPiGQAAhsQzAAAMiWcAABgSzwAAMCSeAQBgSDwDAMCQeAYAgCHxDAAAQ+IZAACGxDMAAAyJZwAAGBLPAAAwJJ4BAGBIPAMAwJB4BgCAIfEMAABD4hkAAIbEMwAADIlnAAAYEs8AADAkngEAYEg8AwDAkHgGAIAh8QwAAEPiGQAAhsQzAAAMiWcAABgSzwAAMCSeAQBgaNN4rqoPVtVTVfXwurFfqKq/qKoHl69r1z32vqo6VlVfrKof26mJAwDAbpscef5Qkms2GL+1uw8sX/cmSVW9PsmNSb5/ec6vVdWe7ZosAACs0qbx3N1/nORrw9e7PslHuvtb3f2VJMeSXLWF+QEAwFljK2ue31NVDy3LOl6+jF2e5LF125xYxp6nqg5V1dGqOnrymae3MA0AANgdZxrPtyX5niQHkjyR5JeX8dpg297oBbr79u4+2N0H97z0kjOcBgAA7J4ziufufrK7T3b33yb59Xx7acaJJFeu2/SKJI9vbYoAAHB2OKN4rqrL1t398SSnzsRxd5Ibq+riqnpdkv1JPrO1KQIAwNlh72YbVNVvJ3lzkldV1YkkP5/kzVV1IGtLMo4n+ckk6e5HququJF9I8mySW7r75M5MHQAAdtem8dzd79hg+I4X2P79Sd6/lUkBAMDZyBUGAQBgSDwDAMCQeAYAgCHxDAAAQ+IZAACGxDMAAAyJZwAAGBLPAAAwJJ4BAGBIPAMAwJB4BgCAIfEMAABD4hkAAIbEMwAADIlnAAAYEs8AADAkngEAYEg8AwDAkHgGAIAh8QwAAEPiGQAAhsQzAAAMiWcAABgSzwAAMCSeAQBgaO+qJ8DMvsP3PG/s+JHrVjATAIALlyPPAAAwJJ4BAGBIPAMAwJB4BgCAIfEMAABD4hkAAIbEMwAADIlnAAAYEs8AADAkngEAYEg8AwDAkHgGAIAh8QwAAEPiGQAAhsQzAAAMiWcAABgSzwAAMCSeAQBgSDwDAMCQeAYAgCHxDAAAQ+IZAACGxDMAAAyJZwAAGBLPAAAwJJ4BAGBIPAMAwJB4BgCAIfEMAABD4hkAAIbEMwAADIlnAAAYEs8AADAkngEAYEg8AwDAkHgGAIAh8QwAAEPiGQAAhsQzAAAMiWcAABgSzwAAMCSeAQBgSDwDAMCQeAYAgCHxDAAAQ3tXPQHO3L7D92w4fvzIdbs8EwCAC8OmR56r6oNV9VRVPbxu7BVVdV9VfWn5/vJlvKrqA1V1rKoeqqo37uTkAQBgN02WbXwoyTXPGTuc5P7u3p/k/uV+krwtyf7l61CS27ZnmgAAsHqbxnN3/3GSrz1n+Pokdy6370xyw7rxD/eaTyW5tKou267JAgDAKp3pBwZf291PJMny/TXL+OVJHlu33YllDAAAznnbfbaN2mCsN9yw6lBVHa2qoyefeXqbpwEAANvvTOP5yVPLMZbvTy3jJ5JcuW67K5I8vtELdPft3X2wuw/ueeklZzgNAADYPWcaz3cnuWm5fVOSj60bf9dy1o2rkzx9ankHAACc6zY9z3NV/XaSNyd5VVWdSPLzSY4kuauqbk7y1SRvXza/N8m1SY4leSbJu3dgzgAAsBKbxnN3v+M0D711g207yS1bnRQAAJyNXJ4bAACGxDMAAAyJZwAAGBLPAAAwJJ4BAGBIPAMAwJB4BgCAIfEMAABDm14khfPDvsP3bDh+/Mh1uzwTAIBzlyPPAAAwJJ4BAGDIso3z0OmWaAAAsDWOPAMAwJB4BgCAIfEMAABD4hkAAIbEMwAADIlnAAAYEs8AADAkngEAYEg8AwDAkHgGAIAh8QwAAEPiGQAAhsQzAAAMiWcAABgSzwAAMCSeAQBgSDwDAMCQeAYAgCHxDAAAQ+IZAACGxDMAAAyJZwAAGBLPAAAwJJ4BAGBIPAMAwJB4BgCAIfEMAABD4hkAAIb2rnoCnDv2Hb5nw/HjR67b5ZkAAKyGI88AADAkngEAYEg8AwDAkDXPFzjrmAEA5hx5BgCAIfEMAABD4hkAAIbEMwAADIlnAAAYEs8AADAkngEAYEg8AwDAkHgGAIAh8QwAAEPiGQAAhsQzAAAMiWcAABjau+oJcO7bd/ie540dP3LdCmYCALCzHHkGAIAh8QwAAEPiGQAAhsQzAAAMiWcAABgSzwAAMCSeAQBgSDwDAMCQeAYAgCFXGGRDG101EADgQufIMwAADIlnAAAYEs8AADAkngEAYGhLHxisquNJvpnkZJJnu/tgVb0iye8k2ZfkeJJ/3d1f39o0AQBg9bbjyPMPd/eB7j643D+c5P7u3p/k/uU+AACc83Zi2cb1Se5cbt+Z5IYd+BkAALDrthrPneSPquqBqjq0jL22u59IkuX7azZ6YlUdqqqjVXX05DNPb3EaAACw87Z6kZQ3dffjVfWaJPdV1Z9Pn9jdtye5PUkuvmx/b3EeAACw47YUz939+PL9qar6aJKrkjxZVZd19xNVdVmSp7ZhnpwnTnflwuNHrtvlmQAAvHhnvGyjqr6rql526naSH03ycJK7k9y0bHZTko9tdZIAAHA22MqR59cm+WhVnXqd3+ruP6yqzya5q6puTvLVJG/f+jQBAGD1zjieu/vLSX5wg/H/k+StW5kUAACcjVxhEAAAhsQzAAAMiWcAABgSzwAAMLTVi6TAjnFOaADgbOPIMwAADIlnAAAYEs8AADAkngEAYMgHBjkrnO7DgQAAZxNHngEAYEg8AwDAkHgGAIAh8QwAAEPiGQAAhsQzAAAMiWcAABgSzwAAMCSeAQBgSDwDAMCQeAYAgCHxDAAAQ3tXPQHYDvsO37Ph+PEj1+3yTACA85kjzwAAMCSeAQBgSDwDAMCQeAYAgCHxDAAAQ+IZAACGnKqOHXG6U8cBAJzLHHkGAIAh8QwAAEPiGQAAhsQzAAAMiWcAABhytg3OOc7kAQCsiiPPAAAwJJ4BAGBIPAMAwJB4BgCAIfEMAABD4hkAAIbEMwAADIlnAAAYEs8AADAkngEAYEg8AwDAkHgGAIChvaueAOykfYfvGW97/Mh1OzgTAOB84MgzAAAMiWcAABgSzwAAMCSeAQBgyAcGYXG6Dxf6ICEAcIojzwAAMCSeAQBgyLIN2MRGyzlezFIOy0EA4PzhyDMAAAyJZwAAGBLPAAAwJJ4BAGDIBwZhG53uw4EAwPnBkWcAABhy5BnOgCPMAHBhEs+wIs7/DADnHss2AABgSDwDAMCQeAYAgCHxDAAAQz4wCGeZF3MmDx8uBIDd5cgzAAAMiWcAABgSzwAAMLRja56r6pok/znJniS/0d1HdupnwYVqo/XR1kEDwM7ZkXiuqj1J/kuSf5HkRJLPVtXd3f2Fnfh5wJl5sVc5fDGxLuwBOB/t1LKNq5Ic6+4vd/f/TfKRJNfv0M8CAIBdUd29/S9a9RNJrunuf7vcf2eSH+ru96zb5lCSQ8vdH0jy8LZPhHPdq5L85aonwVnHfsFG7BdsxH7BRv5Rd7/sTJ+8U2uea4Oxv1Pp3X17ktuTpKqOdvfBHZoL5yj7BRuxX7AR+wUbsV+wkao6upXn79SyjRNJrlx3/4okj+/QzwIAgF2xU/H82ST7q+p1VfUdSW5McvcO/SwAANgVO7Jso7ufrar3JPkfWTtV3Qe7+5EXeMrtOzEPznn2CzZiv2Aj9gs2Yr9gI1vaL3bkA4MAAHA+coVBAAAYEs8AADC08niuqmuq6otVdayqDq96PqxOVR2vqs9X1YOnTiNTVa+oqvuq6kvL95evep7srKr6YFU9VVUPrxvbcD+oNR9Y3j8eqqo3rm7m7KTT7Be/UFV/sbxnPFhV16577H3LfvHFqvqx1cyanVRVV1bVJ6rq0ap6pKreu4x7v7iAvcB+sW3vFyuN53WX8X5bktcneUdVvX6Vc2Llfri7D6w7L+fhJPd39/4k9y/3Ob99KMk1zxk73X7wtiT7l69DSW7bpTmy+z6U5+8XSXLr8p5xoLvvTZLl35Ebk3z/8pxfW/694fzybJKf6e7vS3J1kluW//beLy5sp9svkm16v1j1kWeX8WYz1ye5c7l9Z5IbVjgXdkF3/3GSrz1n+HT7wfVJPtxrPpXk0qq6bHdmym46zX5xOtcn+Uh3f6u7v5LkWNb+veE80t1PdPfnltvfTPJoksvj/eKC9gL7xem86PeLVcfz5UkeW3f/RF74F+T81kn+qKoeWC7fniSv7e4nkrX/IZK8ZmWzY5VOtx94D+E9y5/gP7huWZf94gJTVfuSvCHJp+P9gsVz9otkm94vVh3Pm17GmwvKm7r7jVn709otVfXPVz0hznreQy5styX5niQHkjyR5JeXcfvFBaSqvjvJ7yX5qe7+qxfadIMx+8V5aoP9YtveL1Ydzy7jzf/X3Y8v359K8tGs/dnkyVN/Vlu+P7W6GbJCp9sPvIdcwLr7ye4+2d1/m+TX8+0/tdovLhBVdVHWAuk3u/v3l2HvFxe4jfaL7Xy/WHU8u4w3SZKq+q6qetmp20l+NMnDWdsfblo2uynJx1YzQ1bsdPvB3UnetXyK/uokT5/6cy3nv+esV/3xrL1nJGv7xY1VdXFVvS5rHxD7zG7Pj51VVZXkjiSPdvevrHvI+8UF7HT7xXa+X+zI5bmnzuAy3py/Xpvko2v7fPYm+a3u/sOq+mySu6rq5iRfTfL2Fc6RXVBVv53kzUleVVUnkvx8kiPZeD+4N8m1WfuAxzNJ3r3rE2ZXnGa/eHNVHcjan1iPJ/nJJOnuR6rqriRfyNon72/p7pOrmDc76k1J3pnk81X14DL2c/F+caE73X7xju16v3B5bgAAGFr1sg0AADhniGcAABgSzwAAMCSeAQBgSDwDAMCQeAYAgCHxDAAAQ/8PL17VPO5O75sAAAAASUVORK5CYII=\n",
      "text/plain": [
       "<Figure size 864x864 with 1 Axes>"
      ]
     },
     "metadata": {
      "needs_background": "light"
     },
     "output_type": "display_data"
    },
    {
     "data": {
      "image/png": "iVBORw0KGgoAAAANSUhEUgAAAs8AAAKvCAYAAACVhiLtAAAABHNCSVQICAgIfAhkiAAAAAlwSFlzAAALEgAACxIB0t1+/AAAADh0RVh0U29mdHdhcmUAbWF0cGxvdGxpYiB2ZXJzaW9uMy4xLjMsIGh0dHA6Ly9tYXRwbG90bGliLm9yZy+AADFEAAAd/klEQVR4nO3dbaxl51nf4f9dj3EIpHbeNdiWJoJpS2iFk7rGUqQqJBQSG9VBIpWjiliRpaGSIwWBWiZ8AaRGmkglppFKJIPTOBUQLCCKhV1K6iRCfMjLOBjHjkkzTYZ4sGWLJjFBFqk83P1wluuDvcfn9pyXPS/XJR3tvZ+99p7nKCvbPz1n7bWquwMAAGztH6x7AgAAcLYQzwAAMCSeAQBgSDwDAMCQeAYAgCHxDAAAQ+N4rqoLqupPq+oPlsevqqrPVNWXq+p3quo7lvGLlsfHlucP7M7UAQBgbz2fled3JXlw0+P3Jrm5uw8m+UaSG5fxG5N8o7u/L8nNy3YAAHDWG8VzVV2W5Nokv7E8riRvSPK7yya3JXnLcv+65XGW59+4bA8AAGe1fcPtfjXJf0jyouXxS5N8s7ufXB6fSHLpcv/SJA8lSXc/WVWPL9v/1eY3rKpDSQ4lSV34gn9+4Usve9Y/+s8uvXj8iwAAwFbuueeev+rul5/u67eM56r68SSPdfc9VfX6p4ZXbNqD554e6L4lyS1JctH+g73/hl991ouOHrl2q+kBAMBYVf3Fdl4/WXl+XZJ/XVXXJHlBkn+YjZXoS6pq37L6fFmSh5ftTyS5PMmJqtqX5OIkX9/OJAEA4Eyw5THP3f3u7r6suw8kuT7JJ7r73yb5ZJKfXDa7IcnHlvt3LI+zPP+J7n7WyjMAAJxttnOe559P8rNVdSwbxzTfuozfmuSly/jPJjm8vSkCAMCZYfqFwSRJd38qyaeW+19JctWKbf42yVt3YG4AAHBGcYVBAAAYEs8AADAkngEAYEg8AwDAkHgGAIAh8QwAAEPiGQAAhsQzAAAMiWcAABgSzwAAMCSeAQBgSDwDAMCQeAYAgCHxDAAAQ+IZAACGxDMAAAyJZwAAGBLPAAAwJJ4BAGBIPAMAwJB4BgCAIfEMAABD4hkAAIbEMwAADIlnAAAYEs8AADAkngEAYEg8AwDAkHgGAIAh8QwAAEPiGQAAhsQzAAAMiWcAABgSzwAAMCSeAQBgSDwDAMCQeAYAgCHxDAAAQ+IZAACGxDMAAAyJZwAAGBLPAAAwJJ4BAGBIPAMAwJB4BgCAIfEMAABD4hkAAIbEMwAADIlnAAAYEs8AADAkngEAYEg8AwDAkHgGAIAh8QwAAEPiGQAAhsQzAAAMiWcAABgSzwAAMCSeAQBgSDwDAMCQeAYAgCHxDAAAQ+IZAACGxDMAAAyJZwAAGBLPAAAwJJ4BAGBIPAMAwJB4BgCAIfEMAABD4hkAAIbEMwAADIlnAAAY2jKeq+oFVfXZqvqzqnqgqn55Gf9QVX21qu5dfq5Yxquq3l9Vx6rqvqp67W7/EgAAsBf2Dbb5dpI3dPffVNWFSf6kqv778ty/7+7ffcb2b05ycPn5oSQfWG4BAOCstuXKc2/4m+XhhctPP8dLrkvy4eV1n05ySVXt3/5UAQBgvUbHPFfVBVV1b5LHkny8uz+zPPWe5dCMm6vqomXs0iQPbXr5iWXsme95qKqOVtXRk088vo1fAQAA9sYonrv7ZHdfkeSyJFdV1T9N8u4k/yTJv0jykiQ/v2xeq95ixXve0t1XdveVF7zw4tOaPAAA7KXndbaN7v5mkk8leVN3P7IcmvHtJP81yVXLZieSXL7pZZcleXgH5goAAGs1OdvGy6vqkuX+dyb5kSR//tRxzFVVSd6S5P7lJXckefty1o2rkzze3Y/syuwBAGAPTc62sT/JbVV1QTZi+/bu/oOq+kRVvTwbh2ncm+TfLdvfleSaJMeSPJHkHTs/bQAA2HtbxnN335fkNSvG33CK7TvJTdufGgAAnFlcYRAAAIbEMwAADIlnAAAYEs8AADAkngEAYEg8AwDAkHgGAIAh8QwAAEPiGQAAhsQzAAAMiWcAABgSzwAAMCSeAQBgSDwDAMCQeAYAgCHxDAAAQ+IZAACGxDMAAAyJZwAAGBLPAAAwJJ4BAGBIPAMAwJB4BgCAIfEMAABD4hkAAIbEMwAADIlnAAAYEs8AADAkngEAYEg8AwDAkHgGAIAh8QwAAEPiGQAAhsQzAAAMiWcAABgSzwAAMCSeAQBgSDwDAMCQeAYAgCHxDAAAQ+IZAACGxDMAAAyJZwAAGBLPAAAwJJ4BAGBIPAMAwJB4BgCAIfEMAABD4hkAAIbEMwAADIlnAAAYEs8AADAkngEAYEg8AwDAkHgGAIAh8QwAAEPiGQAAhsQzAAAM7Vv3BJ7LgcN3Pmvs+JFr1zATAACw8gwAAGPiGQAAhsQzAAAMiWcAABgSzwAAMCSeAQBgSDwDAMCQeAYAgCHxDAAAQ+IZAACGxDMAAAyJZwAAGBLPAAAwtGU8V9ULquqzVfVnVfVAVf3yMv6qqvpMVX25qn6nqr5jGb9oeXxsef7A7v4KAACwNyYrz99O8obu/sEkVyR5U1VdneS9SW7u7oNJvpHkxmX7G5N8o7u/L8nNy3YAAHDW2zKee8PfLA8vXH46yRuS/O4yfluStyz3r1seZ3n+jVVVOzZjAABYk9Exz1V1QVXdm+SxJB9P8r+TfLO7n1w2OZHk0uX+pUkeSpLl+ceTvHQnJw0AAOswiufuPtndVyS5LMlVSb5/1WbL7apV5n7mQFUdqqqjVXX05BOPT+cLAABr87zOttHd30zyqSRXJ7mkqvYtT12W5OHl/okklyfJ8vzFSb6+4r1u6e4ru/vKC1548enNHgAA9tDkbBsvr6pLlvvfmeRHkjyY5JNJfnLZ7IYkH1vu37E8zvL8J7r7WSvPAABwttm39SbZn+S2qrogG7F9e3f/QVV9MclHquo/JvnTJLcu29+a5L9V1bFsrDhfvwvzBgCAPbdlPHf3fUles2L8K9k4/vmZ43+b5K07MjsAADiDuMIgAAAMiWcAABgSzwAAMCSeAQBgSDwDAMCQeAYAgCHxDAAAQ+IZAACGxDMAAAyJZwAAGBLPAAAwJJ4BAGBIPAMAwJB4BgCAIfEMAABD4hkAAIbEMwAADIlnAAAYEs8AADAkngEAYEg8AwDAkHgGAIAh8QwAAEPiGQAAhsQzAAAMiWcAABgSzwAAMCSeAQBgSDwDAMCQeAYAgCHxDAAAQ+IZAACGxDMAAAyJZwAAGBLPAAAwJJ4BAGBIPAMAwJB4BgCAIfEMAABD4hkAAIbEMwAADIlnAAAYEs8AADAkngEAYEg8AwDAkHgGAIAh8QwAAEPiGQAAhsQzAAAMiWcAABgSzwAAMCSeAQBgSDwDAMCQeAYAgCHxDAAAQ+IZAACGxDMAAAztW/cE+PsOHL5z5fjxI9fu8UwAAHimcyaeRScAALvNYRsAADAkngEAYEg8AwDAkHgGAIAh8QwAAEPiGQAAhsQzAAAMiWcAABgSzwAAMCSeAQBgSDwDAMCQeAYAgCHxDAAAQ+IZAACGtoznqrq8qj5ZVQ9W1QNV9a5l/Jeq6i+r6t7l55pNr3l3VR2rqi9V1Y/t5i8AAAB7Zd9gmyeT/Fx3f76qXpTknqr6+PLczd39nzZvXFWvTnJ9kh9I8j1J/mdV/aPuPrmTEwcAgL225cpzdz/S3Z9f7n8ryYNJLn2Ol1yX5CPd/e3u/mqSY0mu2onJAgDAOj2vY56r6kCS1yT5zDL0zqq6r6o+WFUvXsYuTfLQppedyIrYrqpDVXW0qo6efOLx5z1xAADYa+N4rqrvTvJ7SX6mu/86yQeSfG+SK5I8kuRXntp0xcv7WQPdt3T3ld195QUvvPh5TxwAAPbaKJ6r6sJshPNvdvfvJ0l3P9rdJ7v775L8ep4+NONEkss3vfyyJA/v3JQBAGA9JmfbqCS3Jnmwu9+3aXz/ps1+Isn9y/07klxfVRdV1auSHEzy2Z2bMgAArMfkbBuvS/JTSb5QVfcuY7+Q5G1VdUU2Dsk4nuSnk6S7H6iq25N8MRtn6rjJmTYAADgXbBnP3f0nWX0c813P8Zr3JHnPNuYFAABnHFcYBACAoclhG2eUA4fvXPcUAAA4T1l5BgCAIfEMAABD4hkAAIbEMwAADIlnAAAYEs8AADAkngEAYEg8AwDAkHgGAIAh8QwAAEPiGQAAhsQzAAAMiWcAABgSzwAAMCSeAQBgSDwDAMCQeAYAgCHxDAAAQ/vWPYEz3YHDd64cP37k2j2eCQAA62blGQAAhsQzAAAMiWcAABgSzwAAMCSeAQBgSDwDAMCQeAYAgCHxDAAAQ+IZAACGxDMAAAyJZwAAGBLPAAAwtG/dEziXHDh858rx40eu3eOZAACwG6w8AwDAkHgGAIAh8QwAAEPiGQAAhsQzAAAMiWcAABgSzwAAMCSeAQBgSDwDAMCQeAYAgCHxDAAAQ+IZAACG9q17AueDA4fvXDl+/Mi1ezwTAAC2w8ozAAAMnZcrz1aCAQA4HVaeAQBgSDwDAMCQeAYAgCHxDAAAQ+IZAACGxDMAAAyJZwAAGBLPAAAwJJ4BAGBIPAMAwNB5eXnuUznVZbsBACCx8gwAAGPiGQAAhsQzAAAMiWcAABjyhcE18gVFAICzi5VnAAAYEs8AADAkngEAYEg8AwDAkHgGAIAh8QwAAEPiGQAAhraM56q6vKo+WVUPVtUDVfWuZfwlVfXxqvrycvviZbyq6v1Vdayq7quq1+72LwEAAHthsvL8ZJKf6+7vT3J1kpuq6tVJDie5u7sPJrl7eZwkb05ycPk5lOQDOz5rAABYgy3jubsf6e7PL/e/leTBJJcmuS7JbctmtyV5y3L/uiQf7g2fTnJJVe3f8ZkDAMAee17HPFfVgSSvSfKZJK/s7keSjcBO8opls0uTPLTpZSeWMQAAOKuN47mqvjvJ7yX5me7+6+fadMVYr3i/Q1V1tKqOnnzi8ek0AABgbfZNNqqqC7MRzr/Z3b+/DD9aVfu7+5HlsIzHlvETSS7f9PLLkjz8zPfs7luS3JIkF+0/+Ky43ikHDt+5W28NAMB5ZnK2jUpya5IHu/t9m566I8kNy/0bknxs0/jbl7NuXJ3k8acO7wAAgLPZZOX5dUl+KskXqureZewXkhxJcntV3Zjka0neujx3V5JrkhxL8kSSd+zojAEAYE22jOfu/pOsPo45Sd64YvtOctM25wUAAGccVxgEAIAh8QwAAEPiGQAAhsQzAAAMiWcAABgSzwAAMCSeAQBgSDwDAMCQeAYAgCHxDAAAQ+IZAACGxDMAAAyJZwAAGBLPAAAwJJ4BAGBIPAMAwNC+dU/gbHXg8J3rngIAAHvMyjMAAAyJZwAAGBLPAAAwJJ4BAGBIPAMAwJB4BgCAIfEMAABD4hkAAIbEMwAADIlnAAAYEs8AADAkngEAYEg8AwDAkHgGAIAh8QwAAEPiGQAAhsQzAAAMiWcAABgSzwAAMCSeAQBgSDwDAMCQeAYAgCHxDAAAQ+IZAACGxDMAAAyJZwAAGBLPAAAwJJ4BAGBIPAMAwJB4BgCAIfEMAABD4hkAAIbEMwAADIlnAAAYEs8AADAkngEAYEg8AwDAkHgGAIAh8QwAAEPiGQAAhsQzAAAMiWcAABgSzwAAMCSeAQBgSDwDAMCQeAYAgCHxDAAAQ+IZAACGxDMAAAyJZwAAGBLPAAAwJJ4BAGBIPAMAwJB4BgCAIfEMAABD4hkAAIa2jOeq+mBVPVZV928a+6Wq+suqunf5uWbTc++uqmNV9aWq+rHdmjgAAOy1ycrzh5K8acX4zd19xfJzV5JU1auTXJ/kB5bX/FpVXbBTkwUAgHXaMp67+4+TfH34ftcl+Uh3f7u7v5rkWJKrtjE/AAA4Y2znmOd3VtV9y2EdL17GLk3y0KZtTixjz1JVh6rqaFUdPfnE49uYBgAA7I3TjecPJPneJFckeSTJryzjtWLbXvUG3X1Ld1/Z3Vde8MKLT3MaAACwd04rnrv70e4+2d1/l+TX8/ShGSeSXL5p08uSPLy9KQIAwJlh3+m8qKr2d/cjy8OfSPLUmTjuSPJbVfW+JN+T5GCSz257luTA4TufNXb8yLVrmAkAwPlry3iuqt9O8vokL6uqE0l+Mcnrq+qKbByScTzJTydJdz9QVbcn+WKSJ5Pc1N0nd2fqAACwt7aM5+5+24rhW59j+/ckec92JgUAAGciVxgEAIAh8QwAAEPiGQAAhsQzAAAMiWcAABgSzwAAMCSeAQBgSDwDAMCQeAYAgCHxDAAAQ+IZAACGxDMAAAyJZwAAGBLPAAAwJJ4BAGBIPAMAwJB4BgCAIfEMAABD4hkAAIbEMwAADIlnAAAYEs8AADAkngEAYEg8AwDAkHgGAIAh8QwAAEPiGQAAhsQzAAAMiWcAABgSzwAAMCSeAQBgSDwDAMCQeAYAgCHxDAAAQ+IZAACGxDMAAAyJZwAAGBLPAAAwJJ4BAGBIPAMAwJB4BgCAIfEMAABD4hkAAIbEMwAADIlnAAAYEs8AADAkngEAYEg8AwDAkHgGAIAh8QwAAEPiGQAAhsQzAAAMiWcAABgSzwAAMCSeAQBgSDwDAMCQeAYAgCHxDAAAQ+IZAACGxDMAAAyJZwAAGBLPAAAwJJ4BAGBIPAMAwJB4BgCAIfEMAABD4hkAAIbEMwAADIlnAAAYEs8AADAkngEAYEg8AwDA0JbxXFUfrKrHqur+TWMvqaqPV9WXl9sXL+NVVe+vqmNVdV9VvXY3Jw8AAHtpsvL8oSRvesbY4SR3d/fBJHcvj5PkzUkOLj+HknxgZ6YJAADrt2+rDbr7j6vqwDOGr0vy+uX+bUk+leTnl/EPd3cn+XRVXVJV+7v7kZ2aME87cPjOlePHj1y7xzMBADg/nO4xz698KoiX21cs45cmeWjTdieWMQAAOOvt9BcGa8VYr9yw6lBVHa2qoyefeHyHpwEAADvvdOP50aranyTL7WPL+Ikkl2/a7rIkD696g+6+pbuv7O4rL3jhxac5DQAA2DunG893JLlhuX9Dko9tGn/7ctaNq5M87nhnAADOFVt+YbCqfjsbXw58WVWdSPKLSY4kub2qbkzytSRvXTa/K8k1SY4leSLJO3ZhzgAAsBaTs2287RRPvXHFtp3kpu1OCgAAzkSuMAgAAEPiGQAAhsQzAAAMbXnMM2efVVcedNVBAIDts/IMAABD4hkAAIbEMwAADIlnAAAYEs8AADAkngEAYEg8AwDAkPM8nydWnfs5cf5nAIDnw8ozAAAMiWcAABgSzwAAMCSeAQBgSDwDAMCQeAYAgCHxDAAAQ+IZAACGxDMAAAyJZwAAGBLPAAAwJJ4BAGBIPAMAwJB4BgCAIfEMAABD4hkAAIbEMwAADIlnAAAYEs8AADAkngEAYEg8AwDAkHgGAIAh8QwAAEPiGQAAhsQzAAAMiWcAABgSzwAAMCSeAQBgSDwDAMCQeAYAgKF9654AZ6YDh+981tjxI9euYSYAAGcOK88AADAkngEAYEg8AwDAkHgGAIAh8QwAAEPiGQAAhsQzAAAMiWcAABgSzwAAMOQKg+e5VVcSBABgNSvPAAAwJJ4BAGBIPAMAwJB4BgCAIfEMAABD4hkAAIbEMwAADIlnAAAYEs8AADAkngEAYEg8AwDAkHgGAIAh8QwAAEPiGQAAhsQzAAAMiWcAABgSzwAAMLRv3ROAUzlw+M6V48ePXLvHMwEA2GDlGQAAhsQzAAAMbeuwjao6nuRbSU4mebK7r6yqlyT5nSQHkhxP8m+6+xvbmyYAAKzfTqw8/3B3X9HdVy6PDye5u7sPJrl7eQwAAGe93Ths47okty33b0vyll34NwAAYM9tN547yR9V1T1VdWgZe2V3P5Iky+0rVr2wqg5V1dGqOnryice3OQ0AANh92z1V3eu6++GqekWSj1fVn09f2N23JLklSS7af7C3OQ8AANh121p57u6Hl9vHknw0yVVJHq2q/Umy3D623UkCAMCZ4LTjuaq+q6pe9NT9JD+a5P4kdyS5YdnshiQf2+4kAQDgTLCdwzZemeSjVfXU+/xWd/9hVX0uye1VdWOSryV56/anCQAA63fa8dzdX0nygyvG/0+SN25nUpz9XFobADgXucIgAAAMiWcAABja7qnqOI+c6lAMAIDzhZVnAAAYEs8AADAkngEAYEg8AwDAkHgGAIAh8QwAAEPiGQAAhsQzAAAMiWcAABgSzwAAMCSeAQBgSDwDAMCQeAYAgCHxDAAAQ+IZAACGxDMAAAztW/cEOL8cOHznyvHjR67d45kAADx/Vp4BAGBIPAMAwJB4BgCAIfEMAABD4hkAAIacbYMzwqnOwgEAcCax8gwAAEPiGQAAhsQzAAAMiWcAABgSzwAAMCSeAQBgyKnqOCec6lR3x49cu8czAQDOZVaeAQBgSDwDAMCQeAYAgCHxDAAAQ+IZAACGxDMAAAyJZwAAGBLPAAAwJJ4BAGDIFQZhC6uuXujKhQBwfhLPnHVOdSluAIDd5rANAAAYEs8AADAkngEAYEg8AwDAkC8Mck7z5UIAYCdZeQYAgCHxDAAAQ+IZAACGxDMAAAz5wiCchlN9EdFluwHg3GblGQAAhsQzAAAMiWcAABgSzwAAMCSeAQBgSDwDAMCQeAYAgCHxDAAAQ+IZAACGXGEQdtCqKw+e6qqDrlIIAGcfK88AADAkngEAYMhhG7DLTnV4BgBw9rHyDAAAQ1ae4QzzfL50CADsLSvPAAAwJJ4BAGDIYRtwFnBOaAA4M1h5BgCAoV1bea6qNyX5z0kuSPIb3X1kt/4t4GlWqQFg91R37/ybVl2Q5H8l+VdJTiT5XJK3dfcXV21/0f6Dvf+GX93xeQA7S4ADcLarqnu6+8rTff1uHbZxVZJj3f2V7v6/ST6S5Lpd+rcAAGBP7NZhG5cmeWjT4xNJfmjzBlV1KMmh5eG3/+K9P37/Ls2Fs9fLkvzVuifB0+q9655BEvsFq9kvWMV+wSr/eDsv3q14rhVjf+/4kO6+JcktSVJVR7ezfM65yX7BKvYLVrFfsIr9glWq6uh2Xr9bh22cSHL5pseXJXl4l/4tAADYE7sVz59LcrCqXlVV35Hk+iR37NK/BQAAe2JXDtvo7ier6p1J/kc2TlX3we5+4DlecstuzIOznv2CVewXrGK/YBX7Batsa7/YlVPVAQDAucgVBgEAYEg8AwDA0NrjuareVFVfqqpjVXV43fNhfarqeFV9oarufeo0MlX1kqr6eFV9ebl98brnye6qqg9W1WNVdf+msZX7QW14//L5cV9VvXZ9M2c3nWK/+KWq+svlM+Peqrpm03PvXvaLL1XVj61n1uymqrq8qj5ZVQ9W1QNV9a5l3OfFeew59osd+7xYazwvl/H+L0nenOTVSd5WVa9e55xYux/u7is2nZfzcJK7u/tgkruXx5zbPpTkTc8YO9V+8OYkB5efQ0k+sEdzZO99KM/eL5Lk5uUz44ruvitJlv+OXJ/kB5bX/Nry3xvOLU8m+bnu/v4kVye5afnf3ufF+e1U+0WyQ58X6155dhlvtnJdktuW+7clecsa58Ie6O4/TvL1Zwyfaj+4LsmHe8Onk1xSVfv3ZqbspVPsF6dyXZKPdPe3u/urSY5l4783nEO6+5Hu/vxy/1tJHszGFY59XpzHnmO/OJXn/Xmx7nhedRnv5/oFObd1kj+qqnuWy7cnySu7+5Fk4/8QSV6xttmxTqfaD3yG8M7lT/Af3HRYl/3iPFNVB5K8Jsln4vOCxTP2i2SHPi/WHc9bXsab88rruvu12fjT2k1V9S/XPSHOeD5Dzm8fSPK9Sa5I8kiSX1nG7Rfnkar67iS/l+Rnuvuvn2vTFWP2i3PUiv1ixz4v1h3PLuPN/9fdDy+3jyX5aDb+bPLoU39WW24fW98MWaNT7Qc+Q85j3f1od5/s7r9L8ut5+k+t9ovzRFVdmI1A+s3u/v1l2OfFeW7VfrGTnxfrjmeX8SZJUlXfVVUveup+kh9Ncn829ocbls1uSPKx9cyQNTvVfnBHkrcv36K/OsnjT/25lnPfM45X/YlsfGYkG/vF9VV1UVW9KhtfEPvsXs+P3VVVleTWJA929/s2PeXz4jx2qv1iJz8vduXy3FOncRlvzl2vTPLRjX0++5L8Vnf/YVV9LsntVXVjkq8leesa58geqKrfTvL6JC+rqhNJfjHJkazeD+5Kck02vuDxRJJ37PmE2ROn2C9eX1VXZONPrMeT/HSSdPcDVXV7ki9m45v3N3X3yXXMm131uiQ/leQLVXXvMvYL8XlxvjvVfvG2nfq8cHluAAAYWvdhGwAAcNYQzwAAMCSeAQBgSDwDAMCQeAYAgCHxDAAAQ+IZAACG/h8Nj89UhddIggAAAABJRU5ErkJggg==\n",
      "text/plain": [
       "<Figure size 864x864 with 1 Axes>"
      ]
     },
     "metadata": {
      "needs_background": "light"
     },
     "output_type": "display_data"
    },
    {
     "data": {
      "image/png": "iVBORw0KGgoAAAANSUhEUgAAAs8AAAKvCAYAAACVhiLtAAAABHNCSVQICAgIfAhkiAAAAAlwSFlzAAALEgAACxIB0t1+/AAAADh0RVh0U29mdHdhcmUAbWF0cGxvdGxpYiB2ZXJzaW9uMy4xLjMsIGh0dHA6Ly9tYXRwbG90bGliLm9yZy+AADFEAAAd+klEQVR4nO3df4xdZ53f8c+3cTYsC034Gbl2JEes2wKt1lA3GylSlYXtEpJVHaRNlagCC0UylYIEWtRi+AdWKpKRCqFI3UhmkxIqFoj4oUQk3W4aQIg/CDhsNiRkKS54iYkViwIGFG2qmKd/zHGZ2teebzw/7oz9ekmjufe559x5LA43bz1z5pwaYwQAAFja35v3BAAAYKMQzwAA0CSeAQCgSTwDAECTeAYAgCbxDAAATe14rqoLquqvquqL0/PLq+rBqvpeVX2mqn5jGr9oen5wen3b6kwdAADW1nNZeX5HkscXPf9gklvHGNuT/DTJzdP4zUl+Osb47SS3TtsBAMCG14rnqtqa5LokfzY9rySvS/LZaZM7k1w/Pd41Pc/0+uun7QEAYEPb1NzuI0n+fZIXTs9fkuRnY4xnp+eHk2yZHm9J8kSSjDGerapj0/Y/XvyGVbUnyZ4kqQuf988ufMnWU37oP91ycfsfAgAAS3nooYd+PMZ42dnuv2Q8V9UfJjk6xnioqq4+MTxj09F47dcDY+xPsj9JLtq8fWze/ZFTdjqw77qlpgcAAG1V9bfL2b+z8nxVkn9VVdcmeV6Sv5+FlehLqmrTtPq8NcmT0/aHk1yW5HBVbUpycZKfLGeSAACwHix5zvMY4z1jjK1jjG1JbkzypTHGv0ny5SR/NG22O8nd0+N7pueZXv/SGOOUlWcAANholnOd53cn+eOqOpiFc5pvn8ZvT/KSafyPk+xd3hQBAGB96P7BYJJkjPGVJF+ZHn8/yRUztvm7JDeswNwAAGBdcYdBAABoEs8AANAkngEAoEk8AwBAk3gGAIAm8QwAAE3iGQAAmsQzAAA0iWcAAGgSzwAA0CSeAQCgSTwDAECTeAYAgCbxDAAATeIZAACaxDMAADSJZwAAaBLPAADQJJ4BAKBJPAMAQJN4BgCAJvEMAABN4hkAAJrEMwAANIlnAABoEs8AANAkngEAoEk8AwBAk3gGAIAm8QwAAE3iGQAAmsQzAAA0iWcAAGgSzwAA0CSeAQCgSTwDAECTeAYAgCbxDAAATeIZAACaxDMAADSJZwAAaBLPAADQJJ4BAKBJPAMAQJN4BgCAJvEMAABN4hkAAJrEMwAANIlnAABoEs8AANAkngEAoEk8AwBAk3gGAIAm8QwAAE3iGQAAmsQzAAA0iWcAAGgSzwAA0CSeAQCgSTwDAECTeAYAgCbxDAAATeIZAACaxDMAADSJZwAAaBLPAADQJJ4BAKBJPAMAQJN4BgCAJvEMAABN4hkAAJrEMwAANIlnAABoWjKeq+p5VfWNqvrrqnqsqv5kGv94Vf2gqh6evnZM41VVH62qg1X1SFW9drX/EQAAsBY2NbZ5Jsnrxhi/rKoLk3ytqv7b9Nq/G2N89qTt35hk+/T1u0lum74DAMCGtuTK81jwy+nphdPXOMMuu5J8Ytrv60kuqarNy58qAADMV+uc56q6oKoeTnI0yf1jjAenlz4wnZpxa1VdNI1tSfLEot0PT2Mnv+eeqjpQVQeOP31sGf8EAABYG614HmMcH2PsSLI1yRVV9U+SvCfJP07yz5O8OMm7p81r1lvMeM/9Y4ydY4ydFzz/4rOaPAAArKXndLWNMcbPknwlyTVjjCPTqRnPJPkvSa6YNjuc5LJFu21N8uQKzBUAAOaqc7WNl1XVJdPj30zy+0n+5sR5zFVVSa5P8ui0yz1J3jJddePKJMfGGEdWZfYAALCGOlfb2Jzkzqq6IAuxfdcY44tV9aWqelkWTtN4OMm/nba/L8m1SQ4meTrJW1d+2gAAsPaWjOcxxiNJXjNj/HWn2X4kuWX5UwMAgPXFHQYBAKBJPAMAQJN4BgCAJvEMAABN4hkAAJrEMwAANIlnAABoEs8AANAkngEAoEk8AwBAk3gGAIAm8QwAAE3iGQAAmsQzAAA0iWcAAGgSzwAA0CSeAQCgSTwDAECTeAYAgCbxDAAATeIZAACaxDMAADSJZwAAaBLPAADQJJ4BAKBJPAMAQJN4BgCAJvEMAABN4hkAAJrEMwAANIlnAABoEs8AANAkngEAoEk8AwBAk3gGAIAm8QwAAE3iGQAAmsQzAAA0iWcAAGgSzwAA0CSeAQCgSTwDAECTeAYAgCbxDAAATeIZAACaxDMAADSJZwAAaBLPAADQJJ4BAKBJPAMAQJN4BgCAJvEMAABN4hkAAJrEMwAANIlnAABoEs8AANAkngEAoEk8AwBAk3gGAIAm8QwAAE3iGQAAmsQzAAA0iWcAAGgSzwAA0CSeAQCgSTwDAECTeAYAgCbxDAAATeIZAACaxDMAADSJZwAAaBLPAADQtGQ8V9XzquobVfXXVfVYVf3JNH55VT1YVd+rqs9U1W9M4xdNzw9Or29b3X8CAACsjc7K8zNJXjfG+J0kO5JcU1VXJvlgklvHGNuT/DTJzdP2Nyf56Rjjt5PcOm0HAAAb3pLxPBb8cnp64fQ1krwuyWen8TuTXD893jU9z/T666uqVmzGAAAwJ61znqvqgqp6OMnRJPcn+V9JfjbGeHba5HCSLdPjLUmeSJLp9WNJXrKSkwYAgHloxfMY4/gYY0eSrUmuSPLKWZtN32etMo+TB6pqT1UdqKoDx58+1p0vAADMzXO62sYY42dJvpLkyiSXVNWm6aWtSZ6cHh9OclmSTK9fnOQnM95r/xhj5xhj5wXPv/jsZg8AAGuoc7WNl1XVJdPj30zy+0keT/LlJH80bbY7yd3T43um55le/9IY45SVZwAA2Gg2Lb1JNie5s6ouyEJs3zXG+GJVfSfJp6vqPyT5qyS3T9vfnuS/VtXBLKw437gK8wYAgDW3ZDyPMR5J8poZ49/PwvnPJ4//XZIbVmR2AACwjrjDIAAANIlnAABoEs8AANAkngEAoEk8AwBAk3gGAIAm8QwAAE3iGQAAmsQzAAA0iWcAAGgSzwAA0CSeAQCgSTwDAECTeAYAgCbxDAAATeIZAACaxDMAADSJZwAAaBLPAADQJJ4BAKBJPAMAQJN4BgCAJvEMAABN4hkAAJrEMwAANIlnAABoEs8AANAkngEAoEk8AwBAk3gGAIAm8QwAAE3iGQAAmsQzAAA0iWcAAGgSzwAA0CSeAQCgSTwDAECTeAYAgCbxDAAATeIZAACaNs17Ameybe+9p4wd2nfdHGYCAABWngEAoE08AwBAk3gGAIAm8QwAAE3iGQAAmsQzAAA0iWcAAGgSzwAA0CSeAQCgSTwDAECTeAYAgCbxDAAATeIZAACaxDMAADSJZwAAaBLPAADQJJ4BAKBJPAMAQJN4BgCAJvEMAABN4hkAAJrEMwAANIlnAABoEs8AANAkngEAoEk8AwBAk3gGAIAm8QwAAE3iGQAAmsQzAAA0iWcAAGgSzwAA0LRkPFfVZVX15ap6vKoeq6p3TOPvr6ofVdXD09e1i/Z5T1UdrKrvVtUbVvMfAAAAa2VTY5tnk7xrjPGtqnphkoeq6v7ptVvHGP9x8cZV9aokNyZ5dZJ/kOR/VNU/HGMcX8mJAwDAWlty5XmMcWSM8a3p8S+SPJ5kyxl22ZXk02OMZ8YYP0hyMMkVKzFZAACYp+d0znNVbUvymiQPTkNvr6pHquqOqnrRNLYlyROLdjucGbFdVXuq6kBVHTj+9LHnPHEAAFhr7Xiuqhck+VySd44xfp7ktiSvSLIjyZEkHzqx6YzdxykDY+wfY+wcY+y84PkXP+eJAwDAWmvFc1VdmIVw/uQY4/NJMsZ4aoxxfIzxqyQfy69PzTic5LJFu29N8uTKTRkAAOajc7WNSnJ7ksfHGB9eNL550WZvSvLo9PieJDdW1UVVdXmS7Um+sXJTBgCA+ehcbeOqJG9O8u2qengae2+Sm6pqRxZOyTiU5G1JMsZ4rKruSvKdLFyp4xZX2gAA4FywZDyPMb6W2ecx33eGfT6Q5APLmBcAAKw77jAIAABN4hkAAJrEMwAANIlnAABoEs8AANAkngEAoEk8AwBAk3gGAIAm8QwAAE3iGQAAmsQzAAA0iWcAAGgSzwAA0CSeAQCgSTwDAECTeAYAgCbxDAAATeIZAACaxDMAADSJZwAAaBLPAADQJJ4BAKBJPAMAQJN4BgCAJvEMAABN4hkAAJrEMwAANIlnAABoEs8AANAkngEAoEk8AwBAk3gGAIAm8QwAAE3iGQAAmsQzAAA0iWcAAGgSzwAA0CSeAQCgSTwDAECTeAYAgCbxDAAATeIZAACaxDMAADSJZwAAaBLPAADQJJ4BAKBJPAMAQJN4BgCAJvEMAABN4hkAAJrEMwAANIlnAABoEs8AANAkngEAoEk8AwBAk3gGAIAm8QwAAE3iGQAAmsQzAAA0iWcAAGgSzwAA0CSeAQCgSTwDAECTeAYAgCbxDAAATeIZAACaxDMAADSJZwAAaBLPAADQJJ4BAKBJPAMAQJN4BgCApiXjuaouq6ovV9XjVfVYVb1jGn9xVd1fVd+bvr9oGq+q+mhVHayqR6rqtav9jwAAgLXQWXl+Nsm7xhivTHJlkluq6lVJ9iZ5YIyxPckD0/MkeWOS7dPXniS3rfisAQBgDjYttcEY40iSI9PjX1TV40m2JNmV5OppszuTfCXJu6fxT4wxRpKvV9UlVbV5eh+WsG3vvTPHD+27bo1nAgDAyZ7TOc9VtS3Ja5I8mOTSE0E8fX/5tNmWJE8s2u3wNAYAABtaO56r6gVJPpfknWOMn59p0xljY8b77amqA1V14PjTx7rTAACAuVnytI0kqaoLsxDOnxxjfH4afurE6RhVtTnJ0Wn8cJLLFu2+NcmTJ7/nGGN/kv1JctHm7afE9UbklAsAgHNb52obleT2JI+PMT686KV7kuyeHu9Ocvei8bdMV924Mskx5zsDAHAu6Kw8X5XkzUm+XVUPT2PvTbIvyV1VdXOSHya5YXrtviTXJjmY5Okkb13RGQMAwJx0rrbxtcw+jzlJXj9j+5HklmXOCwAA1h13GAQAgCbxDAAATeIZAACaxDMAADS1rvN8PnPtZgAATrDyDAAATeIZAACaxDMAADQ553kNOG8aAODcYOUZAACaxDMAADSJZwAAaBLPAADQJJ4BAKDpnLnahitaAACw2qw8AwBAk3gGAIAm8QwAAE3iGQAAmsQzAAA0iWcAAGgSzwAA0CSeAQCgSTwDAECTeAYAgCbxDAAATeIZAACaxDMAADSJZwAAaBLPAADQJJ4BAKBJPAMAQNOmeU/gudq29955TwEAgPOUlWcAAGgSzwAA0CSeAQCgSTwDAECTeAYAgCbxDAAATeIZAACaNtx1nlfC6a4VfWjfdWs8EwAANhIrzwAA0CSeAQCgSTwDAECTeAYAgKbz8g8GV8Lp/ugQAIBzl5VnAABoEs8AANAkngEAoEk8AwBAk3gGAIAm8QwAAE3iGQAAmsQzAAA0iWcAAGgSzwAA0CSeAQCgSTwDAECTeAYAgCbxDAAATeIZAACaxDMAADSJZwAAaNo07wmsJ9v23jvvKQAAsI5ZeQYAgKZzfuXZajIAACvFyjMAADSJZwAAaBLPAADQJJ4BAKBJPAMAQNM5f7WN9cyVQAAANhYrzwAA0LRkPFfVHVV1tKoeXTT2/qr6UVU9PH1du+i191TVwar6blW9YbUmDgAAa62z8vzxJNfMGL91jLFj+rovSarqVUluTPLqaZ8/raoLVmqyAAAwT0vG8xjjq0l+0ny/XUk+PcZ4ZozxgyQHk1yxjPkBAMC6sZxznt9eVY9Mp3W8aBrbkuSJRdscnsZOUVV7qupAVR04/vSxZUwDAADWxtnG821JXpFkR5IjST40jdeMbcesNxhj7B9j7Bxj7Lzg+Ref5TQAAGDtnFU8jzGeGmMcH2P8KsnH8utTMw4nuWzRpluTPLm8KQIAwPpwVvFcVZsXPX1TkhNX4rgnyY1VdVFVXZ5ke5JvLG+KAACwPix5k5Sq+lSSq5O8tKoOJ3lfkqurakcWTsk4lORtSTLGeKyq7krynSTPJrlljHF8daYOAABra8l4HmPcNGP49jNs/4EkH1jOpAAAYD1yh0EAAGgSzwAA0CSeAQCgSTwDAECTeAYAgCbxDAAATeIZAACaxDMAADSJZwAAaBLPAADQJJ4BAKBJPAMAQJN4BgCAJvEMAABN4hkAAJrEMwAANIlnAABoEs8AANAkngEAoEk8AwBAk3gGAIAm8QwAAE3iGQAAmsQzAAA0iWcAAGgSzwAA0CSeAQCgSTwDAECTeAYAgCbxDAAATeIZAACaxDMAADSJZwAAaBLPAADQJJ4BAKBJPAMAQJN4BgCAJvEMAABN4hkAAJrEMwAANIlnAABoEs8AANAkngEAoEk8AwBAk3gGAIAm8QwAAE3iGQAAmsQzAAA0iWcAAGgSzwAA0CSeAQCgSTwDAECTeAYAgCbxDAAATeIZAACaNs17AvRs23vvKWOH9l03h5kAAJy/rDwDAECTeAYAgCbxDAAATeIZAACaxDMAADSJZwAAaBLPAADQJJ4BAKBJPAMAQJN4BgCAJvEMAABN4hkAAJrEMwAANIlnAABoEs8AANAkngEAoGnJeK6qO6rqaFU9umjsxVV1f1V9b/r+omm8quqjVXWwqh6pqteu5uQBAGAtdVaeP57kmpPG9iZ5YIyxPckD0/MkeWOS7dPXniS3rcw0AQBg/paM5zHGV5P85KThXUnunB7fmeT6ReOfGAu+nuSSqtq8UpMFAIB5Ottzni8dYxxJkun7y6fxLUmeWLTd4WkMAAA2vJX+g8GaMTZmbli1p6oOVNWB408fW+FpAADAytt0lvs9VVWbxxhHptMyjk7jh5Nctmi7rUmenPUGY4z9SfYnyUWbt88MbFbOtr33zhw/tO+6NZ4JAMDGdbYrz/ck2T093p3k7kXjb5muunFlkmMnTu8AAICNbsmV56r6VJKrk7y0qg4neV+SfUnuqqqbk/wwyQ3T5vcluTbJwSRPJ3nrKswZAADmYsl4HmPcdJqXXj9j25HkluVOCgAA1iN3GAQAgCbxDAAATeIZAACaxDMAADSJZwAAaDrbm6SwDrjxCQDA2rLyDAAATeIZAACaxDMAADSJZwAAaBLPAADQJJ4BAKBJPAMAQJN4BgCAJjdJYd1yExgAYL2x8gwAAE3iGQAAmsQzAAA0OeeZNucgAwDnOyvPAADQJJ4BAKDJaRss26zTOZzKAQCci8Tzec55zAAAfU7bAACAJivPzHS6FenVel8r3QDARmDlGQAAmqw8n4NWa9UYAOB8Z+UZAACaxDMAADSJZwAAaBLPAADQJJ4BAKBJPAMAQJN4BgCAJvEMAABN4hkAAJrEMwAANIlnAABoEs8AANC0ad4T4Ny0be+9854CAMCKE8+sC2IbANgInLYBAABN4hkAAJrEMwAANIlnAABoEs8AANAkngEAoEk8AwBAk3gGAIAm8QwAAE3iGQAAmsQzAAA0iWcAAGgSzwAA0CSeAQCgSTwDAECTeAYAgCbxDAAATeIZAACaxDMAADSJZwAAaBLPAADQJJ4BAKBJPAMAQJN4BgCAJvEMAABN4hkAAJrEMwAANIlnAABoEs8AANAkngEAoEk8AwBAk3gGAICmTcvZuaoOJflFkuNJnh1j7KyqFyf5TJJtSQ4l+ddjjJ8ub5oAADB/K7Hy/HtjjB1jjJ3T871JHhhjbE/ywPQcAAA2vNU4bWNXkjunx3cmuX4VfgYAAKy55cbzSPKXVfVQVe2Zxi4dYxxJkun7y2ftWFV7qupAVR04/vSxZU4DAABW37LOeU5y1Rjjyap6eZL7q+pvujuOMfYn2Z8kF23ePpY5DwAAWHXLWnkeYzw5fT+a5AtJrkjyVFVtTpLp+9HlThIAANaDs47nqvqtqnrhicdJ/iDJo0nuSbJ72mx3kruXO0kAAFgPlnPaxqVJvlBVJ97nz8cYf1FV30xyV1XdnOSHSW5Y/jQBAGD+zjqexxjfT/I7M8b/d5LXL2dScCbb9t57ytihfdfNYSYAwPnGHQYBAKBJPAMAQJN4BgCAJvEMAABN4hkAAJrEMwAANIlnAABoEs8AANAkngEAoEk8AwBAk3gGAIAm8QwAAE3iGQAAmsQzAAA0iWcAAGjaNO8JwErYtvfemeOH9l23xjMBAM5lVp4BAKBJPAMAQJN4BgCAJvEMAABN4hkAAJrEMwAANIlnAABoEs8AANDkJikwcaMVAGApVp4BAKBJPAMAQJN4BgCAJvEMAABN4hkAAJrEMwAANIlnAABoEs8AANDkJimcd053MxQAgKVYeQYAgCbxDAAATeIZAACaaowx7znkos3bx+bdH5n3NKDt0L7r5j0FAOAsVNVDY4ydZ7u/lWcAAGgSzwAA0CSeAQCgSTwDAECTeAYAgCbxDAAATeIZAACaxDMAADSJZwAAaBLPAADQtGneE4Bzyba9954y5lbeAHDusPIMAABN4hkAAJqctgFnYdbpGQDAuc/KMwAANFl5hlV2ulVqf0gIABuPlWcAAGgSzwAA0OS0DVhnXCsaANYvK88AANBk5RnmxOXuAGDjsfIMAABN4hkAAJrEMwAANIlnAABoEs8AANDkahuwAbjFNwCsD1aeAQCgycozbGDP5VrRVqkBYPmsPAMAQJN4BgCAJqdtAKfwB4oAMJuVZwAAaBLPAADQJJ4BAKBp1c55rqprkvynJBck+bMxxr7V+lnA0madx+wcZgB4bmqMsfJvWnVBkv+Z5F8mOZzkm0luGmN8Z9b2F23ePjbv/siKzwNYfQIcgI2kqh4aY+w82/1X67SNK5IcHGN8f4zxf5J8OsmuVfpZAACwJlbrtI0tSZ5Y9Pxwkt9dvEFV7UmyZ3r6zN9+8A8fXaW5sHG9NMmP5z0Jzqw+uOY/0nHBLI4LZnFcMMs/Ws7OqxXPNWPs/zs/ZIyxP8n+JKmqA8tZPufc5LhgFscFszgumMVxwSxVdWA5+6/WaRuHk1y26PnWJE+u0s8CAIA1sVrx/M0k26vq8qr6jSQ3JrlnlX4WAACsiVU5bWOM8WxVvT3Jf8/CperuGGM8doZd9q/GPNjwHBfM4rhgFscFszgumGVZx8WqXKoOAADORe4wCAAATeIZAACa5h7PVXVNVX23qg5W1d55z4f5qapDVfXtqnr4xGVkqurFVXV/VX1v+v6iec+T1VVVd1TV0ap6dNHYzOOgFnx0+vx4pKpeO7+Zs5pOc1y8v6p+NH1mPFxV1y567T3TcfHdqnrDfGbNaqqqy6rqy1X1eFU9VlXvmMZ9XpzHznBcrNjnxVzjebqN939O8sYkr0pyU1W9ap5zYu5+b4yxY9F1OfcmeWCMsT3JA9Nzzm0fT3LNSWOnOw7emGT79LUnyW1rNEfW3sdz6nGRJLdOnxk7xhj3Jcn035Ebk7x62udPp//ecG55Nsm7xhivTHJlklum/+19XpzfTndcJCv0eTHvlWe38WYpu5LcOT2+M8n1c5wLa2CM8dUkPzlp+HTHwa4knxgLvp7kkqravDYzZS2d5rg4nV1JPj3GeGaM8YMkB7Pw3xvOIWOMI2OMb02Pf5Hk8Szc4djnxXnsDMfF6Tznz4t5x/Os23if6R/IuW0k+cuqemi6fXuSXDrGOJIs/B8iycvnNjvm6XTHgc8Q3j79Cv6ORad1OS7OM1W1LclrkjwYnxdMTjoukhX6vJh3PC95G2/OK1eNMV6bhV+t3VJV/2LeE2Ld8xlyfrstySuS7EhyJMmHpnHHxXmkql6Q5HNJ3jnG+PmZNp0x5rg4R804Llbs82Le8ew23vw/Y4wnp+9Hk3whC782eerEr9Wm70fnN0Pm6HTHgc+Q89gY46kxxvExxq+SfCy//lWr4+I8UVUXZiGQPjnG+Pw07PPiPDfruFjJz4t5x7PbeJMkqarfqqoXnnic5A+SPJqF42H3tNnuJHfPZ4bM2emOg3uSvGX6K/orkxw78etazn0nna/6pix8ZiQLx8WNVXVRVV2ehT8Q+8Zaz4/VVVWV5PYkj48xPrzoJZ8X57HTHRcr+XmxKrfn7jqL23hz7ro0yRcWjvlsSvLnY4y/qKpvJrmrqm5O8sMkN8xxjqyBqvpUkquTvLSqDid5X5J9mX0c3Jfk2iz8gcfTSd665hNmTZzmuLi6qnZk4Vesh5K8LUnGGI9V1V1JvpOFv7y/ZYxxfB7zZlVdleTNSb5dVQ9PY++Nz4vz3emOi5tW6vPC7bkBAKBp3qdtAADAhiGeAQCgSTwDAECTeAYAgCbxDAAATeIZAACaxDMAADT9X4xI2iJooBEfAAAAAElFTkSuQmCC\n",
      "text/plain": [
       "<Figure size 864x864 with 1 Axes>"
      ]
     },
     "metadata": {
      "needs_background": "light"
     },
     "output_type": "display_data"
    },
    {
     "data": {
      "image/png": "iVBORw0KGgoAAAANSUhEUgAAAs8AAAKvCAYAAACVhiLtAAAABHNCSVQICAgIfAhkiAAAAAlwSFlzAAALEgAACxIB0t1+/AAAADh0RVh0U29mdHdhcmUAbWF0cGxvdGxpYiB2ZXJzaW9uMy4xLjMsIGh0dHA6Ly9tYXRwbG90bGliLm9yZy+AADFEAAAeEElEQVR4nO3dbaxl51nf4f9dj3EIpHbeNbUtTQTTlkCFk7rGUqQqJBQcu6qDRCpHVWJFroZKjhQEapnwBZAaaZAKppFKJIPTOBUlWEAUC7uU1EmE+JCXcTCOHZNmmkzjwVYsmsQEWaTycPfDWdMc7D0+t+e87Hm5Luno7P3stc48R1nZ/uk5a69V3R0AAGBrf2fdEwAAgHOFeAYAgCHxDAAAQ+IZAACGxDMAAAyJZwAAGBrHc1VdVFV/UlW/vzx/VVV9qqq+WFW/XVXfsYxfsjw/trx+YHemDgAAe+v5rDy/K8kjm57/UpLbuvtgkq8nuWUZvyXJ17v7e5PctmwHAADnvFE8V9UVSW5I8hvL80ryhiS/s2xyZ5I3L49vXJ5nef2Ny/YAAHBO2zfc7leT/LskL1qevzTJN7r76eX5iSSXL48vT/JoknT301X15LL9X2z+gVV1KMmhJKmLX/CPL37pFc/6R//R5ZeOfxEAANjK/fff/xfd/fIz3X/LeK6qf57kie6+v6pef2p4xaY9eO3bA923J7k9SS7Zf7D33/yrz9rp6JEbtpoeAACMVdX/3s7+k5Xn1yX5F1V1fZIXJPm72ViJvqyq9i2rz1ckeWzZ/kSSK5OcqKp9SS5N8rXtTBIAAM4GW57z3N3v7u4ruvtAkpuSfKy7/1WSjyf5iWWzm5N8ZHl89/I8y+sf6+5nrTwDAMC5ZjvXef7ZJD9dVceycU7zHcv4HUleuoz/dJLD25siAACcHaYfGEySdPcnknxiefylJNes2Oavk7xlB+YGAABnFXcYBACAIfEMAABD4hkAAIbEMwAADIlnAAAYEs8AADAkngEAYEg8AwDAkHgGAIAh8QwAAEPiGQAAhsQzAAAMiWcAABgSzwAAMCSeAQBgSDwDAMCQeAYAgCHxDAAAQ+IZAACGxDMAAAyJZwAAGBLPAAAwJJ4BAGBIPAMAwJB4BgCAIfEMAABD4hkAAIbEMwAADIlnAAAYEs8AADAkngEAYEg8AwDAkHgGAIAh8QwAAEPiGQAAhsQzAAAMiWcAABgSzwAAMCSeAQBgSDwDAMCQeAYAgCHxDAAAQ+IZAACGxDMAAAyJZwAAGBLPAAAwJJ4BAGBIPAMAwJB4BgCAIfEMAABD4hkAAIbEMwAADIlnAAAYEs8AADAkngEAYEg8AwDAkHgGAIAh8QwAAEPiGQAAhsQzAAAMiWcAABgSzwAAMCSeAQBgSDwDAMCQeAYAgCHxDAAAQ+IZAACGxDMAAAyJZwAAGBLPAAAwJJ4BAGBIPAMAwJB4BgCAoS3juapeUFWfrqo/raqHq+oXl/EPVNWXq+qB5euqZbyq6r1VdayqHqyq1+72LwEAAHth32CbbyV5Q3f/VVVdnOSPq+q/La/92+7+nWds/6YkB5evH0ryvuU7AACc07Zcee4Nf7U8vXj56ufY5cYkH1z2+2SSy6pq//anCgAA6zU657mqLqqqB5I8keSj3f2p5aX3LKdm3FZVlyxjlyd5dNPuJ5axZ/7MQ1V1tKqOnnzqyW38CgAAsDdG8dzdJ7v7qiRXJLmmqn4gybuT/MMk/yTJS5L87LJ5rfoRK37m7d19dXdffdELLz2jyQMAwF56Xlfb6O5vJPlEkuu6+/Hl1IxvJfnPSa5ZNjuR5MpNu12R5LEdmCsAAKzV5GobL6+qy5bH35nkR5L82anzmKuqkrw5yUPLLncnefty1Y1rkzzZ3Y/vyuwBAGAPTa62sT/JnVV1UTZi+67u/v2q+lhVvTwbp2k8kOTfLNvfm+T6JMeSPJXkHTs/bQAA2HtbxnN3P5jkNSvG33Ca7TvJrdufGgAAnF3cYRAAAIbEMwAADIlnAAAYEs8AADAkngEAYEg8AwDAkHgGAIAh8QwAAEPiGQAAhsQzAAAMiWcAABgSzwAAMCSeAQBgSDwDAMCQeAYAgCHxDAAAQ+IZAACGxDMAAAyJZwAAGBLPAAAwJJ4BAGBIPAMAwJB4BgCAIfEMAABD4hkAAIbEMwAADIlnAAAYEs8AADAkngEAYEg8AwDAkHgGAIAh8QwAAEPiGQAAhsQzAAAMiWcAABgSzwAAMCSeAQBgSDwDAMCQeAYAgCHxDAAAQ+IZAACGxDMAAAyJZwAAGBLPAAAwJJ4BAGBIPAMAwJB4BgCAIfEMAABD4hkAAIbEMwAADIlnAAAYEs8AADAkngEAYEg8AwDAkHgGAIAh8QwAAEPiGQAAhsQzAAAMiWcAABgSzwAAMCSeAQBgSDwDAMCQeAYAgCHxDAAAQ+IZAACGxDMAAAyJZwAAGNq37gk8lwOH73nW2PEjN6xhJgAAYOUZAADGxDMAAAyJZwAAGBLPAAAwtGU8V9ULqurTVfWnVfVwVf3iMv6qqvpUVX2xqn67qr5jGb9keX5sef3A7v4KAACwNyYrz99K8obu/sEkVyW5rqquTfJLSW7r7oNJvp7klmX7W5J8vbu/N8lty3YAAHDO2zKee8NfLU8vXr46yRuS/M4yfmeSNy+Pb1yeZ3n9jVVVOzZjAABYk9E5z1V1UVU9kOSJJB9N8r+SfKO7n142OZHk8uXx5UkeTZLl9SeTvHQnJw0AAOswiufuPtndVyW5Isk1Sb5v1WbL91WrzP3Mgao6VFVHq+royaeenM4XAADW5nldbaO7v5HkE0muTXJZVZ26Q+EVSR5bHp9IcmWSLK9fmuRrK37W7d19dXdffdELLz2z2QMAwB6aXG3j5VV12fL4O5P8SJJHknw8yU8sm92c5CPL47uX51le/1h3P2vlGQAAzjX7tt4k+5PcWVUXZSO27+ru36+qzyf5UFX9+yR/kuSOZfs7kvyXqjqWjRXnm3Zh3gAAsOe2jOfufjDJa1aMfykb5z8/c/yvk7xlR2YHAABnEXcYBACAIfEMAABD4hkAAIbEMwAADIlnAAAYEs8AADAkngEAYEg8AwDAkHgGAIAh8QwAAEPiGQAAhsQzAAAMiWcAABgSzwAAMCSeAQBgSDwDAMCQeAYAgCHxDAAAQ+IZAACGxDMAAAyJZwAAGBLPAAAwJJ4BAGBIPAMAwJB4BgCAIfEMAABD4hkAAIbEMwAADIlnAAAYEs8AADAkngEAYEg8AwDAkHgGAIAh8QwAAEPiGQAAhsQzAAAMiWcAABgSzwAAMCSeAQBgSDwDAMCQeAYAgCHxDAAAQ+IZAACGxDMAAAyJZwAAGBLPAAAwJJ4BAGBIPAMAwJB4BgCAIfEMAABD4hkAAIbEMwAADIlnAAAYEs8AADAkngEAYEg8AwDAkHgGAIAh8QwAAEPiGQAAhsQzAAAMiWcAABgSzwAAMCSeAQBgSDwDAMCQeAYAgCHxDAAAQ+IZAACGxDMAAAyJZwAAGBLPAAAwJJ4BAGBIPAMAwJB4BgCAoS3juaqurKqPV9UjVfVwVb1rGf+Fqvrzqnpg+bp+0z7vrqpjVfWFqvqx3fwFAABgr+wbbPN0kp/p7s9W1YuS3F9VH11eu627/8Pmjavq1UluSvL9Sf5ekv9RVX+/u0/u5MQBAGCvbbny3N2Pd/dnl8ffTPJIksufY5cbk3you7/V3V9OcizJNTsxWQAAWKfndc5zVR1I8pokn1qG3llVD1bV+6vqxcvY5Uke3bTbiayI7ao6VFVHq+royaeefN4TBwCAvTaO56r67iS/m+Snuvsvk7wvyfckuSrJ40l++dSmK3bvZw10397dV3f31Re98NLnPXEAANhro3iuqouzEc6/2d2/lyTd/dXuPtndf5Pk1/PtUzNOJLly0+5XJHls56YMAADrMbnaRiW5I8kj3f0rm8b3b9rsx5M8tDy+O8lNVXVJVb0qycEkn965KQMAwHpMrrbxuiRvS/K5qnpgGfu5JG+tqquycUrG8SQ/mSTd/XBV3ZXk89m4UsetrrQBAMD5YMt47u4/zurzmO99jn3ek+Q925gXAACcddxhEAAAhsQzAAAMiWcAABgSzwAAMCSeAQBgSDwDAMDQ5DrPZ5UDh+9ZOX78yA17PBMAAC40Vp4BAGBIPAMAwJB4BgCAIfEMAABD4hkAAIbEMwAADIlnAAAYEs8AADAkngEAYEg8AwDAkHgGAIAh8QwAAEPiGQAAhsQzAAAMiWcAABgSzwAAMCSeAQBgSDwDAMCQeAYAgCHxDAAAQ+IZAACGxDMAAAyJZwAAGBLPAAAwJJ4BAGBIPAMAwJB4BgCAIfEMAABD+9Y9Af62A4fvWTl+/MgNezwTAACeycozAAAMiWcAABhy2sYZWnV6hVMrAADOb1aeAQBgSDwDAMCQeAYAgCHxDAAAQ+IZAACGxDMAAAyJZwAAGBLPAAAwJJ4BAGBIPAMAwJB4BgCAIfEMAABD4hkAAIbEMwAADIlnAAAY2rfuCeyUA4fvWTl+/MgNezwTAADOV1aeAQBgSDwDAMCQeAYAgCHxDAAAQ+fNBwbPBj60CABwfrPyDAAAQ+IZAACGxDMAAAyJZwAAGBLPAAAwJJ4BAGBIPAMAwJB4BgCAIfEMAABD4hkAAIbEMwAADIlnAAAY2jKeq+rKqvp4VT1SVQ9X1buW8ZdU1Uer6ovL9xcv41VV762qY1X1YFW9drd/CQAA2AuTleenk/xMd39fkmuT3FpVr05yOMl93X0wyX3L8yR5U5KDy9ehJO/b8VkDAMAabBnP3f14d392efzNJI8kuTzJjUnuXDa7M8mbl8c3Jvlgb/hkksuqav+OzxwAAPbY8zrnuaoOJHlNkk8leWV3P55sBHaSVyybXZ7k0U27nVjGAADgnDaO56r67iS/m+Snuvsvn2vTFWO94ucdqqqjVXX05FNPTqcBAABrM4rnqro4G+H8m939e8vwV0+djrF8f2IZP5Hkyk27X5HksWf+zO6+vbuv7u6rL3rhpWc6fwAA2DOTq21UkjuSPNLdv7LppbuT3Lw8vjnJRzaNv3256sa1SZ48dXoHAACcy/YNtnldkrcl+VxVPbCM/VySI0nuqqpbknwlyVuW1+5Ncn2SY0meSvKOHZ0xAACsyZbx3N1/nNXnMSfJG1ds30lu3ea8AADgrOMOgwAAMCSeAQBgSDwDAMDQ5AOD57QDh+951tjxIzdse1sAAC48Vp4BAGBIPAMAwJB4BgCAIfEMAABD4hkAAIbO+6ttrLLqqhoAALAVK88AADAkngEAYEg8AwDA0AV5zvPz4fxoAABOsfIMAABD4hkAAIbEMwAADIlnAAAYEs8AADAkngEAYEg8AwDAkHgGAIAh8QwAAEPiGQAAhsQzAAAMiWcAABgSzwAAMCSeAQBgSDwDAMCQeAYAgCHxDAAAQ+IZAACGxDMAAAyJZwAAGBLPAAAwJJ4BAGBIPAMAwJB4BgCAIfEMAABD4hkAAIbEMwAADIlnAAAYEs8AADAkngEAYEg8AwDAkHgGAIAh8QwAAEPiGQAAhvatewIXsgOH71n3FAAAeB6sPAMAwJB4BgCAIfEMAABD4hkAAIbEMwAADIlnAAAYEs8AADAkngEAYMhNUvaAm6EAAJwfrDwDAMCQeAYAgCHxDAAAQ+IZAACGxDMAAAyJZwAAGBLPAAAwJJ4BAGBIPAMAwJB4BgCAIfEMAABD4hkAAIbEMwAADIlnAAAYEs8AADC0ZTxX1fur6omqemjT2C9U1Z9X1QPL1/WbXnt3VR2rqi9U1Y/t1sQBAGCvTVaeP5DkuhXjt3X3VcvXvUlSVa9OclOS71/2+bWquminJgsAAOu0ZTx39x8l+drw592Y5EPd/a3u/nKSY0mu2cb8AADgrLGdc57fWVUPLqd1vHgZuzzJo5u2ObGMPUtVHaqqo1V19ORTT25jGgAAsDfONJ7fl+R7klyV5PEkv7yM14pte9UP6O7bu/vq7r76ohdeeobTAACAvXNG8dzdX+3uk939N0l+Pd8+NeNEkis3bXpFkse2N0UAADg7nFE8V9X+TU9/PMmpK3HcneSmqrqkql6V5GCST29vigAAcHbYt9UGVfVbSV6f5GVVdSLJzyd5fVVdlY1TMo4n+ckk6e6Hq+quJJ9P8nSSW7v75O5MHQAA9taW8dzdb10xfMdzbP+eJO/ZzqQAAOBs5A6DAAAwJJ4BAGBIPAMAwJB4BgCAIfEMAABD4hkAAIbEMwAADIlnAAAYEs8AADAkngEAYEg8AwDAkHgGAIAh8QwAAEPiGQAAhsQzAAAMiWcAABgSzwAAMCSeAQBgSDwDAMCQeAYAgCHxDAAAQ+IZAACGxDMAAAyJZwAAGBLPAAAwJJ4BAGBIPAMAwJB4BgCAIfEMAABD4hkAAIbEMwAADIlnAAAYEs8AADAkngEAYEg8AwDAkHgGAIAh8QwAAEP71j0BZg4cvudZY8eP3LCGmQAAXLisPAMAwJB4BgCAIfEMAABD4hkAAIbEMwAADIlnAAAYEs8AADAkngEAYEg8AwDAkHgGAIAh8QwAAEPiGQAAhsQzAAAMiWcAABgSzwAAMCSeAQBgSDwDAMCQeAYAgCHxDAAAQ+IZAACGxDMAAAztW/cE2HkHDt/zrLHjR25Yw0wAAM4vVp4BAGBIPAMAwJB4BgCAIfEMAABD4hkAAIbEMwAADIlnAAAYEs8AADAkngEAYEg8AwDAkHgGAIAh8QwAAENbxnNVvb+qnqiqhzaNvaSqPlpVX1y+v3gZr6p6b1Udq6oHq+q1uzl5AADYS5OV5w8kue4ZY4eT3NfdB5PctzxPkjclObh8HUryvp2ZJgAArN+W8dzdf5Tka88YvjHJncvjO5O8edP4B3vDJ5NcVlX7d2qyAACwTmd6zvMru/vxJFm+v2IZvzzJo5u2O7GMAQDAOW+nPzBYK8Z65YZVh6rqaFUdPfnUkzs8DQAA2Hn7znC/r1bV/u5+fDkt44ll/ESSKzdtd0WSx1b9gO6+PcntSXLJ/oMrA5vnduDwPeueAgDABeVMV57vTnLz8vjmJB/ZNP725aob1yZ58tTpHQAAcK7bcuW5qn4ryeuTvKyqTiT5+SRHktxVVbck+UqStyyb35vk+iTHkjyV5B27MGcAAFiLLeO5u996mpfeuGLbTnLrdicFAABnI3cYBACAoTP9wCDnmNN9uPD4kRv2eCYAAOcuK88AADAkngEAYEg8AwDAkHOeWWnVOdLOjwYALnRWngEAYEg8AwDAkHgGAIAh8QwAAEPiGQAAhsQzAAAMiWcAABhynWe2zTWhAYALhZVnAAAYEs8AADAkngEAYEg8AwDAkHgGAIAhV9u4wK26UgYAAKtZeQYAgCHxDAAAQ+IZAACGxDMAAAz5wCBnrdN9mNGtvwGAdbHyDAAAQ+IZAACGxDMAAAyJZwAAGBLPAAAwJJ4BAGBIPAMAwJB4BgCAIfEMAABD4hkAAIbEMwAADIlnAAAY2rfuCXDuOHD4nnVPAQBgraw8AwDAkHgGAIAh8QwAAEPiGQAAhsQzAAAMiWcAABgSzwAAMCSeAQBgSDwDAMCQOwyyK053N8LjR27Y45kAAOwcK88AADAkngEAYMhpG+yp053OAQBwLrDyDAAAQ+IZAACGxDMAAAyJZwAAGBLPAAAwJJ4BAGBIPAMAwJB4BgCAIfEMAABD4hkAAIbEMwAADIlnAAAYEs8AADAkngEAYEg8AwDAkHgGAIAh8QwAAEPiGQAAhsQzAAAMiWcAABgSzwAAMCSeAQBgaN92dq6q40m+meRkkqe7++qqekmS305yIMnxJP+yu7++vWkCAMD67cTK8w9391XdffXy/HCS+7r7YJL7lucAAHDO243TNm5Mcufy+M4kb96FfwMAAPbcduO5k/xhVd1fVYeWsVd29+NJsnx/xaodq+pQVR2tqqMnn3pym9MAAIDdt61znpO8rrsfq6pXJPloVf3ZdMfuvj3J7Ulyyf6Dvc15AADArtvWynN3P7Z8fyLJh5Nck+SrVbU/SZbvT2x3kgAAcDY443iuqu+qqhedepzkR5M8lOTuJDcvm92c5CPbnSQAAJwNtnPaxiuTfLiqTv2c/9rdf1BVn0lyV1XdkuQrSd6y/WkCAMD6nXE8d/eXkvzgivH/k+SN25kUAACcjdxhEAAAhsQzAAAMiWcAABgSzwAAMCSeAQBgSDwDAMCQeAYAgCHxDAAAQ+IZAACGxDMAAAyJZwAAGBLPAAAwJJ4BAGBIPAMAwJB4BgCAoX3rngDshAOH71k5fvzIDXs8EwDgfGblGQAAhsQzAAAMiWcAABgSzwAAMOQDg5xzTvfhQACA3WblGQAAhsQzAAAMiWcAABgSzwAAMCSeAQBgSDwDAMCQeAYAgCHxDAAAQ26Swnlt1Q1Vjh+5YQ0zAQDOB1aeAQBgSDwDAMCQeAYAgCHxDAAAQ+IZAACGxDMAAAyJZwAAGBLPAAAwJJ4BAGBIPAMAwJDbc3PBWXXL7sRtuwGArVl5BgCAIfEMAABD4hkAAIbEMwAADIlnAAAYcrUNWLgKBwCwFSvPAAAwJJ4BAGBIPAMAwJB4BgCAIR8YhC2s+iChDxECwIXJyjMAAAyJZwAAGBLPAAAw5JxnWBM3ZQGAc4+VZwAAGBLPAAAw5LQNOANOuQCAC5OVZwAAGBLPAAAw5LQN2EHuRggA5zcrzwAAMCSeAQBgyGkbcJZx6gcAnL2sPAMAwJCVZzgHuK40AJwdrDwDAMCQeAYAgCGnbcAuO90pFwDAucfKMwAADFl5hnOYy9oBwN6y8gwAAEO7tvJcVdcl+Y9JLkryG919ZLf+LWBrVqkBYPuqu3f+h1ZdlOR/JvlnSU4k+UySt3b351dtf8n+g73/5l/d8XkAZ+b5RPVOfCBSxAOwV6rq/u6++kz3363TNq5Jcqy7v9Td/zfJh5LcuEv/FgAA7IndWnn+iSTXdfe/Xp6/LckPdfc7N21zKMmh5ekPJHloxyfCue5lSf5i3ZPgrOO4YBXHBas4LljlH3T3i850590657lWjP2tSu/u25PcniRVdXQ7y+ecnxwXrOK4YBXHBas4Llilqo5uZ//dOm3jRJIrNz2/Islju/RvAQDAntiteP5MkoNV9aqq+o4kNyW5e5f+LQAA2BO7ctpGdz9dVe9M8t+zcam693f3w8+xy+27MQ/OeY4LVnFcsIrjglUcF6yyreNiVz4wCAAA5yN3GAQAgCHxDAAAQ2uP56q6rqq+UFXHqurwuufD+lTV8ar6XFU9cOoyMlX1kqr6aFV9cfn+4nXPk91VVe+vqieq6qFNYyuPg9rw3uX948Gqeu36Zs5uOs1x8QtV9efLe8YDVXX9ptfevRwXX6iqH1vPrNlNVXVlVX28qh6pqoer6l3LuPeLC9hzHBc79n6x1nhebuP9n5K8Kcmrk7y1ql69zjmxdj/c3Vdtui7n4ST3dffBJPctzzm/fSDJdc8YO91x8KYkB5evQ0net0dzZO99IM8+LpLktuU946ruvjdJlv+O3JTk+5d9fm357w3nl6eT/Ex3f1+Sa5Pcuvxv7/3iwna64yLZofeLda88u403W7kxyZ3L4zuTvHmNc2EPdPcfJfnaM4ZPdxzcmOSDveGTSS6rqv17M1P20mmOi9O5McmHuvtb3f3lJMey8d8bziPd/Xh3f3Z5/M0kjyS5PN4vLmjPcVyczvN+v1h3PF+e5NFNz0/kuX9Bzm+d5A+r6v7l9u1J8srufjzZ+D9EklesbXas0+mOA+8hvHP5E/z7N53W5bi4wFTVgSSvSfKpeL9g8YzjItmh94t1x/OWt/HmgvK67n5tNv60dmtV/dN1T4iznveQC9v7knxPkquSPJ7kl5dxx8UFpKq+O8nvJvmp7v7L59p0xZjj4jy14rjYsfeLdcez23jz/3X3Y8v3J5J8OBt/NvnqqT+rLd+fWN8MWaPTHQfeQy5g3f3V7j7Z3X+T5Nfz7T+1Oi4uEFV1cTYC6Te7+/eWYe8XF7hVx8VOvl+sO57dxpskSVV9V1W96NTjJD+a5KFsHA83L5vdnOQj65kha3a64+DuJG9fPkV/bZInT/25lvPfM85X/fFsvGckG8fFTVV1SVW9KhsfEPv0Xs+P3VVVleSOJI90969sesn7xQXsdMfFTr5f7MrtuafO4DbenL9emeTDG8d89iX5r939B1X1mSR3VdUtSb6S5C1rnCN7oKp+K8nrk7ysqk4k+fkkR7L6OLg3yfXZ+IDHU0nesecTZk+c5rh4fVVdlY0/sR5P8pNJ0t0PV9VdST6fjU/e39rdJ9cxb3bV65K8LcnnquqBZezn4v3iQne64+KtO/V+4fbcAAAwtO7TNgAA4JwhngEAYEg8AwDAkHgGAIAh8QwAAEPiGQAAhsQzAAAM/T/qP+CZYmz+7AAAAABJRU5ErkJggg==\n",
      "text/plain": [
       "<Figure size 864x864 with 1 Axes>"
      ]
     },
     "metadata": {
      "needs_background": "light"
     },
     "output_type": "display_data"
    },
    {
     "data": {
[truncated: 937,954 more chars]
