# Supplementary material for: Endogenous protein tagging in medaka using a simplified CRISPR/Cas9 knock-in approach
Source: eLife journal article supplement (doi:10.7554/elife.75050), 2021-12-06
Supplement: supp [file elife_poa_e75050_Supplementary_file_3.xlsx]

## Sheet: Table S1
Table S1: detailed results
Gene targeted	Expression	Genomic location (HdrR strain)	Transcript model used for design (HdrR strain)	Human protein homologue	Medaka strain tagged	Insert (position in corresponding protein)	Cas9 mRNA used	sgRNA used	PCR donor used and template plasmid	Insert size	Distance between Cas9 cut and Insert	Homology Arms lengh	Early lethality (injected embryos)	Mosaic expression in F0 (surviving injected embryos)	Mosaic F0 embryos raised to adulthood	Germline transmission (F1s)
actb (cytoplasmic actin OlCA1)	Actin microfilaments	8:19166549:19174622	actb-203 ENSORLT00000043032.1	ACTB/P60709	Cab	eGFP + Ile-Ala (Nt)	Cas9-mSA (Nt SV40NLS + Ct NucleoplasminNLS)	AP127	AP128/129 on pAP1698	720bp	1bp	34bp/35bp	57% (31/54)	39% (9/23)	0	na
actb (cytoplasmic actin OlCA1)	Actin microfilaments	8:19166549:19174622	actb-203 ENSORLT00000043032.1	ACTB/P60709	Cab	eGFP (Nt)	Cas9-mSA (Nt SV40NLS + Ct NucleoplasminNLS)	AP127	AP286/287 on pAP1698	714bp	0bp	0bp/0bp	45% (54/120)	0% (0/66)	0	na
cbx1b (chromobox 1)	Nuclear DNA	19:19069043:19080868	cbx1b-201 ENSORLT00000041918.1	CBX1/P83916	Cab	eGFP (Nt)	Cas9-mSA (Nt SV40NLS + Ct NucleoplasminNLS)	AP124	AP125/126 on pAP1698	714bp	1bp	36bp/35bp	35% (41/117)	19% (15/76)	2	100% (2/2)
cbx1b (chromobox 1)	Nuclear DNA	19:19069043:19080868	cbx1b-201 ENSORLT00000041918.1	CBX1/P83916	Cab	mGreenLantern (Nt)	Cas9 (Ct SV40NLS)	AP124	AS7/8 on pcDNA3.1-mGreenLantern	714bp	1bp	36bp/34bp	8% (6/68)	9% (6/62)	3	33% (1/3)
cdh2 (cadherin 2 )	Adherens junctions	17:25936815:25998377	cdh2-201 ENSORLT00000021382.2	CADH2/P19022	Cab	eGFP (Ct)	Cas9-mSA (Nt SV40NLS + Ct NucleoplasminNLS)	AP238	AP239/240 on pAP1698	714bp	5bp	33bp/33bp	35% (25/70)	17% (8/45)	5	40%( 2/5)
g3bp1 (G3BP stress granule assembly factor 1)	Stress granules	10:28990460:28998944	g3bp1-201 ENSORLT00000014307.2	G3BP1/Q13283	Cab	eGFP (Ct)	Cas9-mSA (Nt SV40NLS + Ct NucleoplasminNLS)	AP118	AP119/120 on pAP1698	714bp	1bp	34bp/33bp	43% (43/100)	59% (34/57)	8	50% (4/8)
mapre1b (microtubule associated protein RP / EB family member 1)	Microtubule plus-ends	7:29982112:29990335	mapre1b-201 ENSORLT00000025087.2	MARE1/Q15691	Cab	Linker-3xFlag-mScarlet (Ct)	Cas9-mSA (Nt SV40NLS + Ct NucleoplasminNLS)	AP241	AP242/243 on pAP28	786bp	2bp	34bp/33bp	46% (69/150)	11% (9/81)	3	66% (2/3)
myosinhc (myosin heavy chain, fast skeletal muscle)	Muscle cell fibers	8:8974797:8987477	ENSORLT00000002485.2	MYH7/P12883	Cab	mNeonGreen-HAtag-Linker (Nt)	Cas9-mSA (Nt SV40NLS + Ct NucleoplasminNLS)	AP253	AP254/255 on pAP27	759bp	1bp	34bp/34bp	35% (37/104)	23% (16/67)	7	42% (3/7)
pcna (proliferating cell nuclear antigen)	Proliferating cells	9:6551193-6554003	pcna-201 ENSORLT00000028587.1	PCNA/P12004	Cab	mScarlet (Nt)	Cas9-mSA (Nt SV40NLS + Ct NucleoplasminNLS)	AS1	AS1/2 on pAP28	693bp	1bp	33bp/32bp	55% (121/220)	28% (28/99)	4	50% (2/4)
rab11a (member RAS oncogene family)	Cell Trafficking vesicles	3:431872:446214	rab11a-201 ENSORLT00000022954.2	RB11A/P62491	Cab	Gln + eGFP (Nt)	Cas9-mSA (Nt SV40NLS + Ct NucleoplasminNLS)	AP256	AP257/258 on pAP1698	717bp	5bp	33bp/33bp	33% (18/53)	11% (4/35)	4	25% (1/4)
Genomic locations and transcript models are based on Ensembl! Oryzias latipes HdrR strain genome (ASM223467v1). Corresponding human protein number are based on SwissProt. PCR repair donors, PCR primers, PCR template plasmids and sgRNAs can be found in Tables S2/S3/S4/S5. Cas9 mRNA in vitro transcription plasmids can be found in Table S4. Distance between Cas9 cut and insertion is calculated with …

## Sheet: Table S2
Table S2: PCR repair donors
Name	Gene targetted	Insert	Sequence
AP128/129 on pAP1698	actb (cytoplasmic actin OlCA1)	eGFP + Ile-Ala	5'Biotin-GTTTTCCAGTTTAGCCATGGATGATGACATTGCC---eGFP+ATAGCA---GCACTGGTTGTTGACAACGGATCTGGCATGTGCAAA-5'Biotin
AP286/287 on pAP1698	actb (cytoplasmic actin OlCA1)	eGFP	5'Biotin-eGFP-5'Biotin
AP125/126 on pAP1698	cbx1b (chromobox 1)	eGFP	5'Biotin-GAGAAAAAAGACAAGAAGGCGGAAGATGTGGCAGAA---eGFP---GAAGAGGAAGAGGAAGAAGAGTATGTGGTGGAAAAG-5'Biotin
AS7/8 on pcDNA3.1-mGreenLantern	cbx1b (chromobox 1)	mGreenLantern	5'Biotin-GAGAAAAAAGACAAGAAGGCGGAAGATGTGGCAGAA---mGreenLantern---GAAGAGGAAGAGGAAGAAGAGTATGTGGTGGAAAA-5'Biotin
AP239/240 on pAP1698	cdh2 (cadherin 2 )	eGFP	5'Biotin-AAACTGGCAGACATGTACGGTGGGAGCGATGAC---eGFP---TAgGACAAAGGAGCCACACCTGGAAGGATGAAAAGATA-5'Biotin
AP119/120 on pAP1698	g3bp1 (G3BP stress granule assembly factor 1)	eGFP	5'Biotin-CTCTGGGCGGGGGGCGGGCCCCAGCGAGAGCCGC---eGFP---TTCTCGGCTCCCCGTCAGTGAGCTTCAGTTTTCC-5'Biotin
AP242/243 on pAP28	mapre1b (microtubule associated protein RP / EB family member 1)	Linker-3xFlag-mScarlet	5'Biotin-CAGGAGGGTTTTGTGATTCCAGATGCTGAGGAACAG---Linker-3xFlag-mScarlet---GAGGAGTTTTAACTGAAGACTGCAAGCAACCAC-5'Biotin
AP254/255 on pAP27	myosinhc (myosin heavy chain, fast skeletal muscle)	mNeonGreen-HAtag-Linker	5'Biotin-CCCCTCATTTTTAGACATCTCAAGTGCTACCATG---mNeonGreen-HAtag-Linker---AGCACTGACGCAGAGATGGAGGCCTATGGCCCTGC-5'Biotin
AS1/2 on pAP28	pcna (proliferating cell nuclear antigen)	mScarlet	5'Biotin-TCGATCTACGCAACCCTCCACAGAATAACCATG---mScarlet---TTTGAGGCTCGCCTGGTCCAGGGCTCCATCCTG-5'Biotin
AP257/258 on pAP1698	rab11a (member RAS oncogene family)	Gln + eGFP	5'Biotin-TTAAGATAACTGCAGTTCGGATTAACGCGAGGACGATG---CAA+eGFP---GGCACCAGGGATGACGAATACGACTATTTATTC-5'Biotin
PCR repair donors were amplified using primers from Table S3 and plasmids from Table S4. Sequences showed correpond to the coding strand of the inserts. Dark blue: sequence homologous to the targeted locus. Other colors: inserts. Lower case: silent mutation to reduce sgRNA interaction with the PCR repair donor / repaired locus, and to reduce the homology between the locus / PCR repair donor (betw…

## Sheet: Table S3
Table S3: PCR primers
Name	Forward (F) / Reverse (R)	Description	Sequence
AP128	F	PCR donor for eGFP + Ile-Ala insertion in actb (cytoplasmic actin OlCA1)	5'Biotin-GTTTTCCAGTTTAGCCATGGATGATGACATTGCCGTGAGCAAGGGCGAGGAGC
AP129	R		5'Biotin-TTTGCACATGCCAGATCCGTTGTCAACAACCAGTGCTGCTATCTTGTACAGCTCGTCCATG
AP286	F	PCR donor for eGFP without homology arms insertion in actb (cytoplasmic actin OlCA1)	5'Biotin-GTGAGCAAGGGCGAGGAGC
AP287	R		5'Biotin-CTTGTACAGCTCGTCCATG
AP125	F	PCR donor for eGFP insertion in cbx1b (chromobox 1)	5'Biotin-GAGAAAAAAGACAAGAAGGCGGAAGATGTGGCAGAAGTGAGCAAGGGCGAGGAGC
AP126	R		5'Biotin-CTTTTCCACCACATACTCTTCTTCCTCTTCCTCTTCCTTGTACAGCTCGTCCATG
AS7	F	PCR donor for mGreenLantern insertion in cbx1b (chromobox 1)	5'Biotin-GAGAAAAAAGACAAGAAGGCGGAAGATGTGGCAGAAGTGAGCAAGGGCGAGGAGCTG
AS8	R		5'Biotin-TTTTCCACCACATACTCTTCTTCCTCTTCCTCTTCCTTGTACAGCTCGTCCATGTC
AP239	F	PCR donor for eGFP insertion in cdh2 (cadherin 2)	5'Biotin-AAACTGGCAGACATGTACGGTGGGAGCGATGACGTGAGCAAGGGCGAGGAGC
AP240	R		5'Biotin-TATCTTTTCATCCTTCCAGGTGTGGCTCCTTTGTCcTACTTGTACAGCTCGTCCATG
AP119	F	PCR donor for eGFP insertion in g3bp1 (G3BP stress granule assembly factor 1)	5'biotin-CTCTGGGCGGGGGGCGGGCCCCAGCGAGAGCCGCGTGAGCAAGGGCGAGGAGC
AP120	R		5'Biotin-GGAAAACTGAAGCTCACTGACGGGGAGCCGAGAACTTGTACAGCTCGTCCATG
AP242	F	PCR donor for Linker-3xFlag-mScarlet insertion in mapre1b (microtubule associated protein RP / EB family member 1)	5'Biotin-CAGGAGGGTTTTGTGATTCCAGATGCTGAGGAACAGTCTAGCGGACCTTCAGGTAG
AP243	R		5'Biotin-GTGGTTGCTTGCAGTCTTCAGTTAAAACTCCTCCTTGTACAGCTCGTCCATG
AP254	F	PCR donor for mNeonGreen-HAtag-Linker insertion in myosinhc (myosin heavy chain, fast skeletal muscle)	5'Biotin-CCCCTCATTTTTAGACATCTCAAGTGCTACCATGGTCTCCAAAGGGGAGGAAG
AP255	R		5'Biotin-GCAGGGCCATAGGCCTCCATCTCTGCGTCAGTGCTCGAGCTTGATCCACTTGGAC
AS1	F	PCR donor for mScarlet insertion in pcna (proliferating cell nuclear antigen)	5'Biotin-TCGATCTACGCAACCCTCCACAGAATAACCATGGTGAGCAAGGGCGAGGCAGTGATC
AS2	R		5'biotin-CAGGATGGAGCCCTGGACCAGGCGAGCCTCAAACTTGTACAGCTCGTCCATGC
AS9	F	PCR donor for mScarlet insertion in pcna (proliferating cell nuclear antigen)	TCGATCTACGCAACCCTCCACAGAATAACCATGGTGAGCAAGGGCGAGGCAGTGATC
AS10	R		CAGGATGGAGCCCTGGACCAGGCGAGCCTCAAACTTGTACAGCTCGTCCATGC
AP257	F	PCR donor for Gln + eGFP insertion in rab11a (member RAS oncogene family)	5'Biotin-TTAAGATAACTGCAGTTCGGATTAACGCGAGGACGATGCAAGTGAGCAAGGGCGAGGAGC
AP258	R		5'Biotin-GAATAAATAGTCGTATTCGTCATCCCTGGTGCCCTTGTACAGCTCGTCCATG
AS5	F	Genotyping/Sequencing of cbx1b (chromobox 1) insertion	CGAGTATGAGCCAGACTGCA
AS6	R		GCAGCCTTCCGTTTTCCATC
AS11	F	Genotyping/Sequencing of cdh2 (cadherin 2) insertion	GGCAGCAGTGTTTATGTGGC
AS12	R		CAGTGTTCCGTCTCACCTCC
AP552	F	Genotyping of edf1 (ENSORLG00000028283) possible off-target insertion in mNeonGreen-HAtag-Linker-myosinhc line detected by WGS	CTCATTTCTGCAAACATTGTAC
AP554	R		TTTGCACAGAAATGAGCATTTC
AS13	F	Genotyping/Sequencing of mapre1b (microtubule associated protein RP / EB family member 1) insertion	ATTGAGCTGATCTGCCAGGA
AS14	R		TCCGGAACTTTGTGGTCGAG
AP356	F	Genotyping of myosinhc (myosin heavy chain, fast skeletal muscle) insertion	GAGTGCAAAAATGTATTAAGCC
AP358	R		TTTCCTGTTACTGTCTCAACAG
AP357	F	Sequencing of myosinhc (myosin heavy chain, fast skeletal muscle) insertion	AATCTATAAACAAATGGGATGC
AP359	R		TTCCCTTCAGATACATCTCCTC
AS3	F	Genotyping/Sequencing of pcna (proliferating cell nuclear antigen) insertion	CAGATTTGCATCCAGCTTCCG
AS4	R		TAAGGTTGACTCCCATGGCG
AP529	F	Genotyping/Sequencing of rab11a (member RAS oncogene family) insertion	CCCTGTACCGCCGCCAGGCGTC
AP531	R		TAACGGTTAGGTGTGTCCCGCG
PCR primers used to generated PCR donors described in Table S2. Primer polarities are relative to gene ORFs, sequences are 5' to 3'.

## Sheet: Table S4
Table S4: plasmids
Name	Backbone	Insert	Reference	Insert sequence
pAP27	pUC19	Linker-3xFlag-mNeonGreen-HAtag-Linker	This study	TCTAGCGGACCTTCAGGTAGTTCGAGCGACTACAAGGACCACGACGGGGATTATAAAGATCATGATATAGATTATAAAGATGATGATGATAAAGTCTCCAAAGGGGAGGAAGACAACATGGCGTCCCTCCCAGCGACGCACGAACTCCATATCTTTGGGTCCATAAACGGTGTCGATTTCGACATGGTAGGACAAGGGACCGGAAATCCAAATGATGGATATGAGGAGCTAAACCTCAAGAGTACCAAGGGGGACCTCCAATTTTCCCCATGGATACTCGTCCCCCATATCGGGTACGGATTCCATCAATACCTACCATATCCAGATGGGATGTCCCCATTTCAAGCGGCCATGGTAGACGGAAGTGGATACCAAGTACATCGTACGATGCAATTTGAG…
pAP28	pUC19	Linker-3xFlag-mScarlet-HAtag-Linker	This study	TCTAGCGGACCTTCAGGTAGTTCGAGCGACTACAAGGACCACGACGGGGATTATAAAGATCATGATATAGATTATAAAGATGATGATGATAAAGTGAGCAAGGGCGAGGCAGTGATCAAGGAGTTCATGCGGTTCAAGGTGCACATGGAGGGCTCCATGAACGGCCACGAGTTCGAGATCGAGGGCGAGGGCGAGGGCCGCCCCTACGAGGGCACCCAGACCGCCAAGCTGAAGGTGACCAAGGGTGGCCCCCTGCCCTTCTCCTGGGACATCCTGTCCCCTCAGTTCATGTACGGCTCCAGGGCCTTCACCAAGCACCCCGCCGACATCCCCGACTACTATAAGCAGTCCTTCCCCGAGGGCTTCAAGTGGGAGCGCGTGATGAACTTCGAGGACGGC…
pAP1698	pUC19	eGFP	Paix et al., 2017 (Addgene #105242)	GTGAGCAAGGGCGAGGAGCTGTTCACCGGGGTGGTGCCCATCCTGGTCGAGCTGGACGGCGACGTAAACGGCCACAAGTTCAGCGTGTCCGGCGAGGGCGAGGGCGATGCCACCTACGGCAAGCTGACCCTGAAGTTCATCTGCACCACCGGCAAGCTGCCCGTGCCCTGGCCCACCCTCGTGACCACCCTGACCTACGGCGTGCAGTGCTTCAGCCGCTACCCCGACCACATGAAGCAGCACGACTTCTTCAAGTCCGCCATGCCCGAAGGCTACGTCCAGGAGCGCACCATCTTCTTCAAGGACGACGGCAACTACAAGACCCGCGCCGAGGTGAAGTTCGAGGGCGACACCCTGGTGAACCGCATCGAGCTGAAGGGCATCGACTTCAAGGAGGAC…
pcDNA3.1-mGreenLantern	pcDNA3.1	mGreenLantern	Campbell B et al., 2020 (Addgene #161912)	ATGGTGAGCAAGGGCGAGGAGCTGTTCACCGGGGTGGTGCCCATCCTGGTCGAGCTGGACGGCGACGTAAACGGCCACAAGTTCAGCGTCCGCGGCGAGGGCGAGGGCGATGCCACCAACGGCAAGCTGACCCTGAAGTTCATCTGCACCACCGGCAAGCTGCCCGTGCCCTGGCCCACCCTCGTGACCACCTTAGGCTACGGCGTGGCCTGCTTCGCCCGCTACCCCGACCACATGAAGCAGCACGACTTCTTCAAGTCCGCCATGCCCGAAGGCTACGTCCAGGAGCGCACCATCTCTTTCAAGGACGACGGTACCTACAAGACCCGCGCCGAGGTGAAGTTCGAGGGCGACACCCTGGTGAACCGCATCGTGCTGAAGGGCATCGACTTCAAGGAG…
pCS2-Cas9	pCS2+	SP6prom-spyCas9-SV40NLS-SV40_3UTR	Gagnon J et al., 2014 (Addgene #47322)	Cas9 with 1xNLS (Schier lab) for in vitro transcription
PCS2+Cas9	pCS2+	SP6prom-3xFlag-SV40NLS-spyCas9-NucleoplasminNLS-SV40_3UTR	Gu B et al., 2018 (Addgene #122948)	Cas9 with 2xNLS (Rossant lab) for in vitro transcription
PCS2+Cas9-mSA	pCS2+	SP6prom-3xFlag-SV40NLS-spyCas9-NucleoplasminNLS-IgKleader-HAtag-mSA-SV40_3UTR	Gu B et al., 2018 (Addgene #103882)	Cas9-mSA with 2xNLS (Rossant lab) for in vitro transcription
Plasmids used to generate PCR repair donors and Cas9 mRNA.

## Sheet: Table S5
Table S5: sgRNAs
sgRNA name (polarity)	Targeted gene	Sequence (spacer)
AP127 (Sense)	actb (cytoplasmic actin OlCA1)	GGAUGAUGACAUUGCCGCAC
AP124 (Sense)	cbx1b (chromobox 1)	GGAAGAUGUGGCAGAAGAAG
AP238 (Sense)	cdh2 (cadherin 2)	GGGAGCGAUGACUAAGACAA
AP118 (Sense)	g3bp1 (G3BP stress granule assembly factor 1)	CCCCAGCGAGAGCCGCUUCU
AP241 (Sense)	mapre1b (microtubule associated protein RP / EB family member 1)	UCCAGAUGCUGAGGAACAGG
AP253 (AntiSense)	myosinhc (myosin heavy chain, fast skeletal muscle)	CAUCUCUGCGUCAGUGCUCA
AS7 (AntiSense)	pcna (proliferating cell nuclear antigen)	GACCAGGCGAGCCUCAAACA
AP256 (Sense)	rab11a (member RAS oncogene family)	UCGGAUUAACGCGAGGACGA
sgRNAs sequences used with spyCas9. The spacer is the 20nt upstream the NGG PAM. sgRNA polarities are relative to gene ORFs.

## Sheet: Table S6
Table S6: lines generated and maintained
Line genotype	Marker	Exon targeted	in-frame KI (by Sanger sequencing)	Homozygous viable
(eGFP-cbx1b)	Nuclear DNA	Exon 2 (Gene model without ATG annotated. eGFP insertion near beginning of ORF just upstream the first Chromo domain)	yes	yes
(mGreenLantern-cbx1b)	Nuclear DNA	Exon 2 (Gene model without ATG annotated. eGFP insertion near beginning of ORF just upstream the first Chromo domain)	yes	nd
(cdh2-eGFP)	Adherens junctions	Exon 16 (eGFP insertion at Stop codon)	yes	yes
(g3bp1-eGFP)	Stress granules	Exon 11 (eGFP insertion 18bp upstream Stop the codon)	na	yes
(mapre1b-Linker-3xFlag-mScarlet)	Microtubule plus-ends	Exon 7 (Linker-3xFlag-mScarlet insertion 9bp upstream the Stop codon)	yes	yes
(mNeonGreen-HAtag-Linker-myosinhc)	Muscle cell fibers	Exon 1 (mNeonGreen-HAtag-Linker insertion at ATG)	yes	yes
(mScarlet-pcna)	Proliferating cells	Exon 1 (mScarlet insertion at ATG)	yes	no
(eGFP-rab11a)	Cell Trafficking vesicles	Exon 1 (eGFP insertion at ATG)	yes	yes
(eGFP-cbx1b) (mScarlet-pcna)	Nuclear DNA / Proliferating cells	Cross of (eGFP-cbx1b) and (mScarlet-pcna)	na	nd
Fluorescent reporter CRISPR/Cas9 KI lines generated (Cab background, details in Table 1 and Table S1) and maintained (F3 generation for eGFP-cbx1b; F2 generation for cdh2-eGFP, g3bp1-eGFP, mNeonGreen-HAtag-Linker-myosinhc, eGFP-rab11a and mScarlet-pcna; F1 generation for mGreenLantern-cbx1b and mapre1-Linker-3xFlag-mScarlet). Homozygous viable assessed at end of embryogenesis (stage 41-42).

## Sheet: Table S7
Table S7: Comparison of Cas9 mRNAs and PCR repair donors
Targeted Knock-In	Cas9 mRNA used	PCR repair donor with 5'Biotins	Early lethality (injected embryos)	Mosaic expression in F0s (surviving injected embryos)	Average early lethality (n=2)	Average mosaic expression in F0s (n=2)
eGFP-cbx1b	Cas9 (Ct SV40NLS)	Yes	10.8% (5/46) and 18.8% (10/53)	7.3% (3/41) and 11.6% (5/43)	14.8%, SD 5.6%	9.4%, SD 3.0%
eGFP-cbx1b	Cas9 (Nt SV40NLS + Ct NucleoplasminNLS)	Yes	36.3% (24/66) and 32.3% (11/34)	14.2% (6/42) and 17.3% (4/23)	34.3%, SD 2.8%	15.7%, SD 2.1%
eGFP-cbx1b	Cas9-mSA (Nt SV40NLS + Ct NucleoplasminNLS)	Yes	41.0% (16/39) and 51.1% (23/45)	21.7% (5/23) and 13.6% (3/22)	46.0%, SD 7.1%	17.6%, SD 5.7%
mScarlet-pcna	Cas9-mSA (Nt SV40NLS + Ct NucleoplasminNLS)	No	46.8% (15/32) and 39.5% (19/48)	23.5% (4/17) and 34.4% (10/29)	43.1%, SD 5.1%	28.9%, SD 7.7%
mScarlet-pcna	Cas9-mSA (Nt SV40NLS + Ct NucleoplasminNLS)	Yes	42.6% (35/82) and 53.5% (38/71)	31.9% (15/47) and 30.3% (10/33)	48.0%, SD 7.7%	31.1%, SD 1.1%
Cas9 mRNA constructs used are, Cas9 with Ct SV40NLS (Schier lab; Gagnon J et al., 2014), Cas9 with Nt SV40NLS and Ct NucleoplasminNLS (Rossant lab; Gu B et al., 2018), and Cas9 with Nt SV40NLS and Ct NucleoplasminNLS + mSA (Rossant lab; Gu B et al., 2018). PCR repair donors contain either no modification or 5'Biotin in both ends. Targeted loci details, homology arm lenghts and sgRNAs used can be …
