# Supplementary material for: Endogenous protein tagging in medaka using a simplified CRISPR/Cas9 knock-in approach
Source: eLife journal article supplement (doi:10.7554/elife.75050), 2021-12-06
Supplement: supp [file elife_poa_e75050_Supplementary_file_4.xlsx]

## Sheet: Table 1
Table 1: quantification of targeting efficiency
Gene targeted	Expression	Fluorescent Protein Insert	Insert size	Homology Arms length	Early lethality (injected embryos)	Mosaic expression in F0 (surviving injected embryos)	Mosaic F0 embryos raised to adulthood	Germline transmission (F1s)	Homozygous viable
actb (cytoplasmic actin OlCA1)	Actin microfilaments	eGFP (Nt)	720bp	34bp/35bp	57% (31/54)	39% (9/23)	0	na	na
cbx1b (chromobox 1)	Nuclear DNA	eGFP (Nt)	714bp	36bp/35bp	35% (41/117)	19% (15/76)	2	100% (2/2)	yes
cdh2 (cadherin 2)	Adherens junctions	eGFP (Ct)	714bp	33bp/33bp	35% (25/70)	17% (8/45)	5	40% (2/5)	yes
g3bp1 (G3BP stress granule assembly factor 1)	Stress granules	eGFP (Ct)	714bp	34bp/33bp	43% (43/100)	59% (34/57)	8	50% (4/8)	yes
mapre1b (microtubule associated protein RP / EB family member 1)	Microtubule plus-ends	Linker-3xFlag-mScarlet (Ct)	786bp	34bp/33bp	46% (69/150)	11% (9/81)	3	66% (2/3)	yes
myosinhc (myosin heavy chain, fast skeletal muscle)	Muscle cell fibers	mNeonGreen-HAtag-Linker (Nt)	759bp	34bp/34bp	35% (37/104)	23% (16/67)	7	42% (3/7)	yes
pcna (proliferating cell nuclear antigen)	Proliferating cells	mScarlet (Nt)	693bp	33bp/32bp	55% (121/220)	28% (28/99)	4	50% (2/4)	no
rab11a (member RAS oncogene family)	Cell Trafficking vesicles	eGFP (Nt)	717bp	33bp/33bp	33% (18/53)	11% (4/35)	4	25% (1/4)	yes
Results of FP Knock-Ins in medaka. Detailed results and reagents used can be found in Tables S1-S6. PCR repair donors contain Biotin in both 5'ends and Cas9-mSA mRNA was used. Homozygous viable assessed at end of embryogenesis (stage 41-42).
The average efficency of KI across the 8 loci (Mosaic expression in F0, surviving injected embryos) is 25% (+/- 16%), with 53% (+/-24%) of germline transmission (F0s giving positive F1s)
