# Supplementary figures and images for: Endogenous protein tagging in medaka using a simplified CRISPR/Cas9 knock-in approach
Source: eLife journal article supplement (doi:10.7554/elife.75050), 2021-12-06

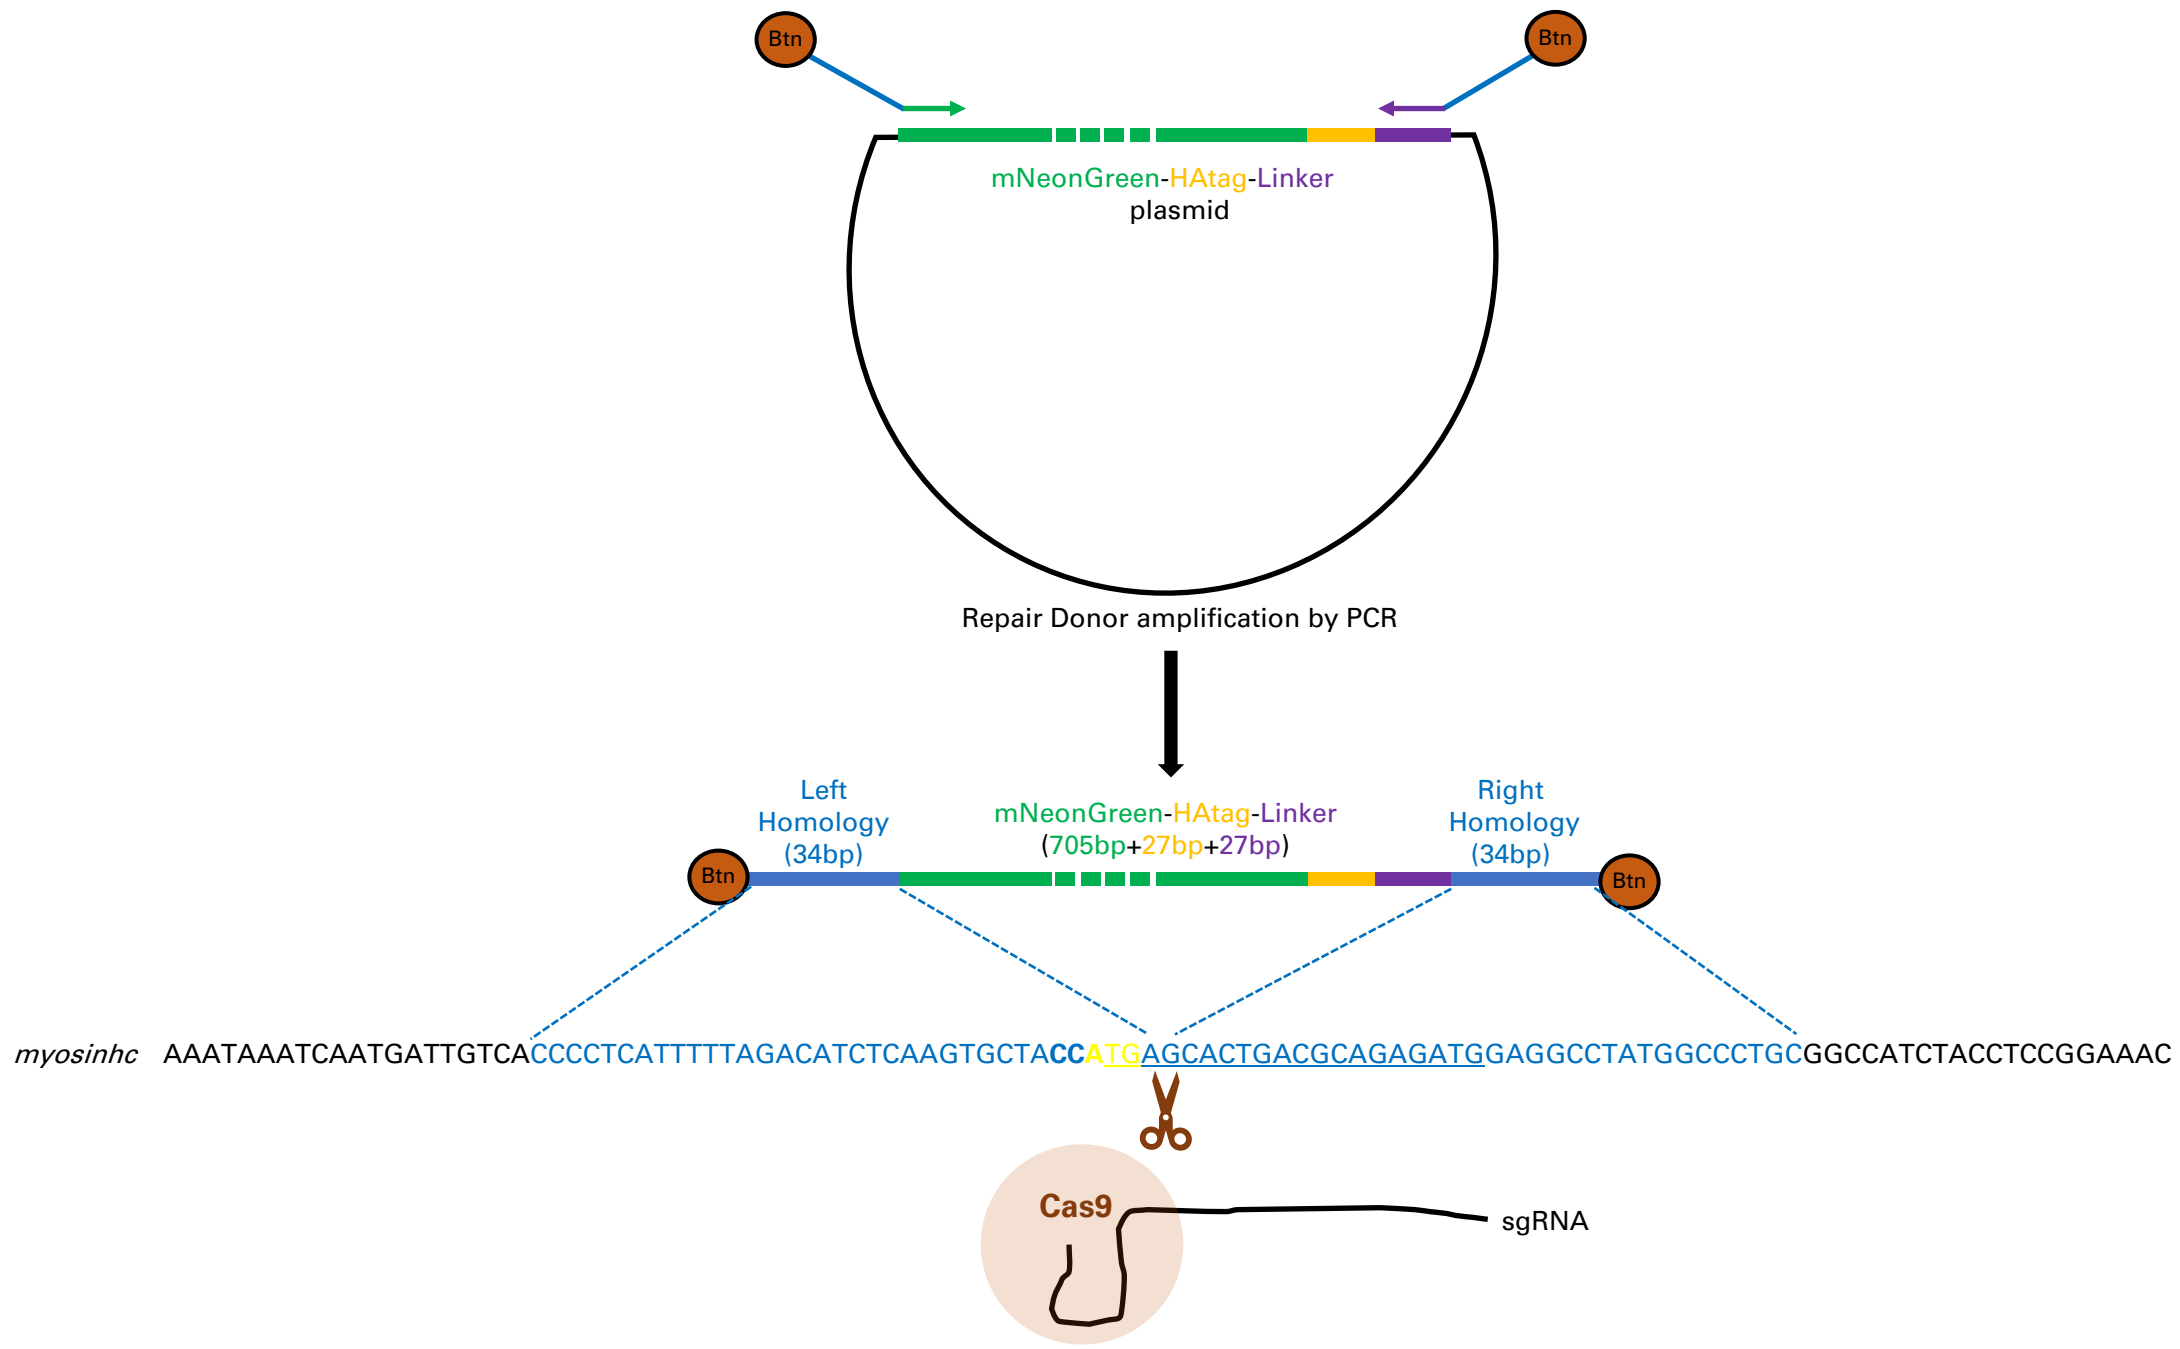

Supplement: supp [file elife-75050-supp-v2.zip]

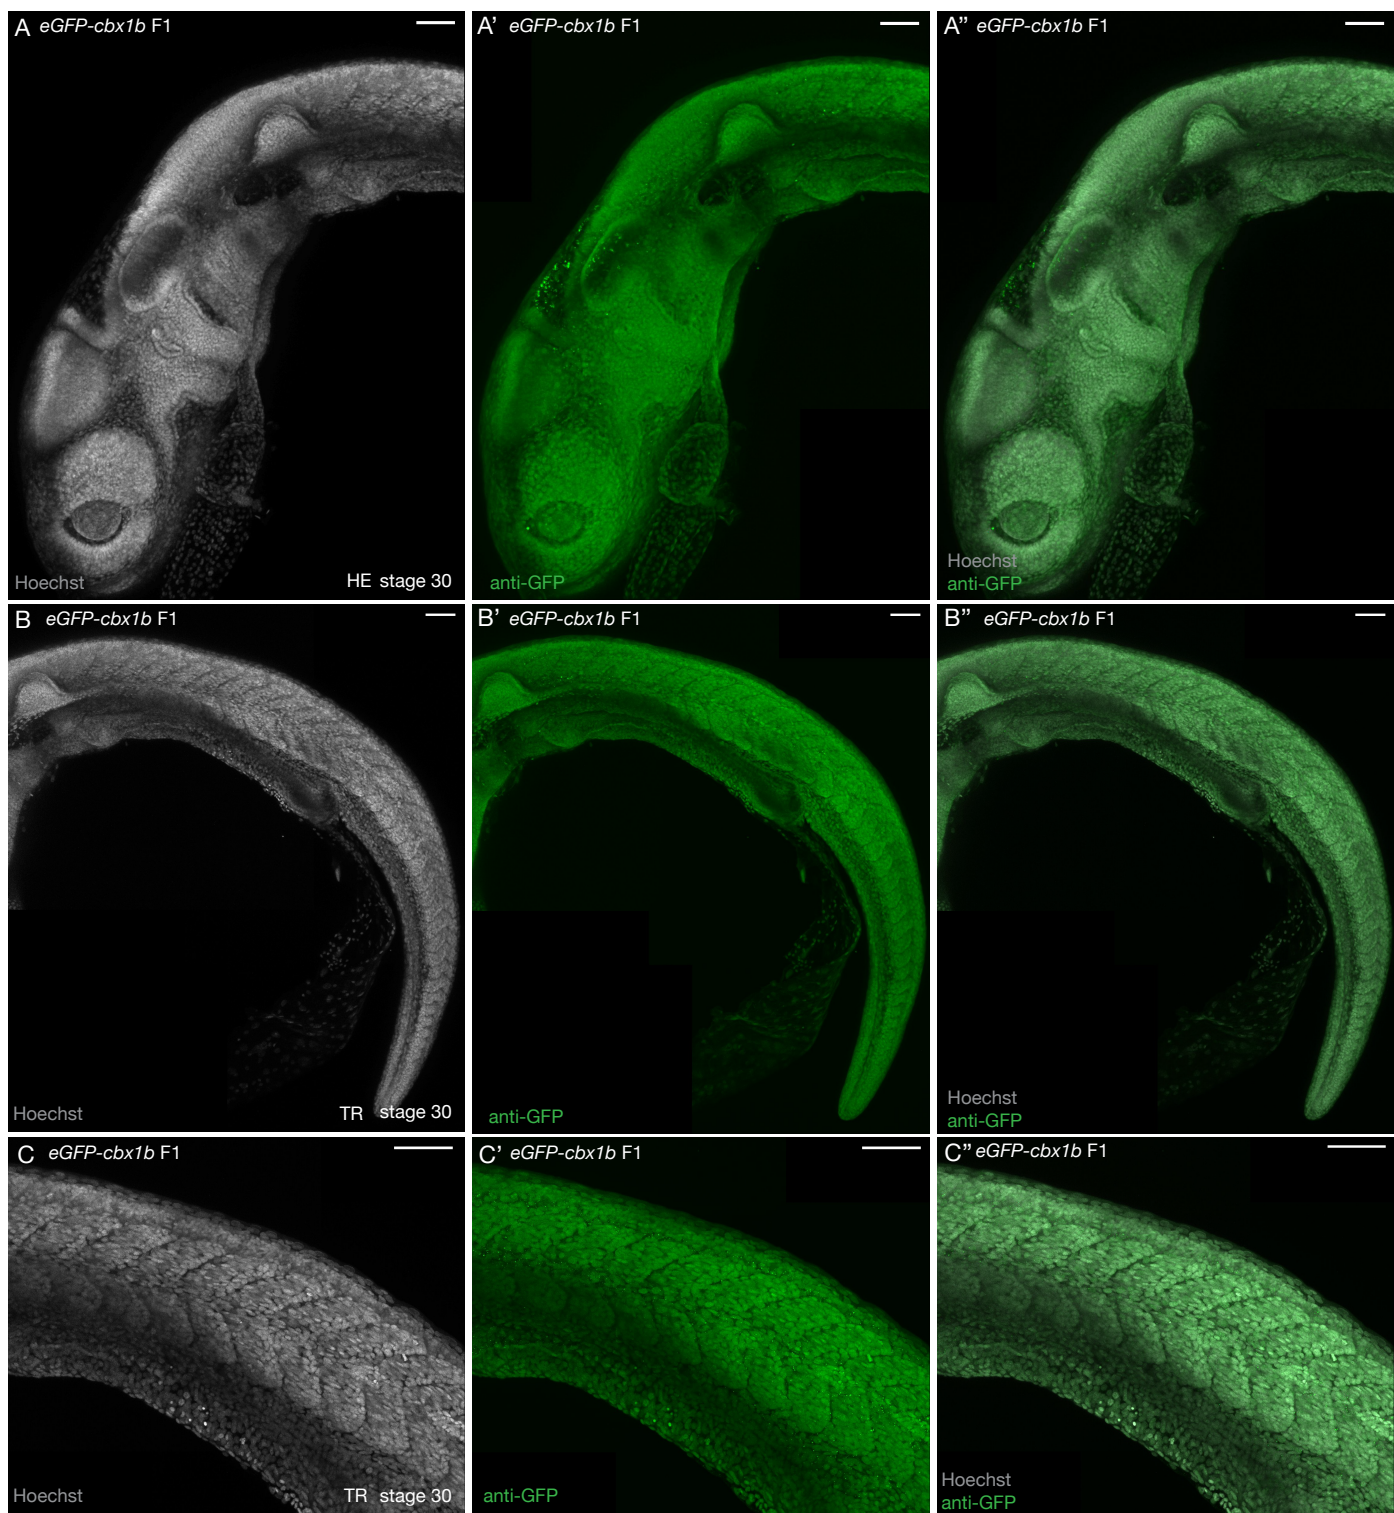

Seleit et al., Supp. Figure 5

Supplement: supp [file elife-75050-supp-v2.zip]

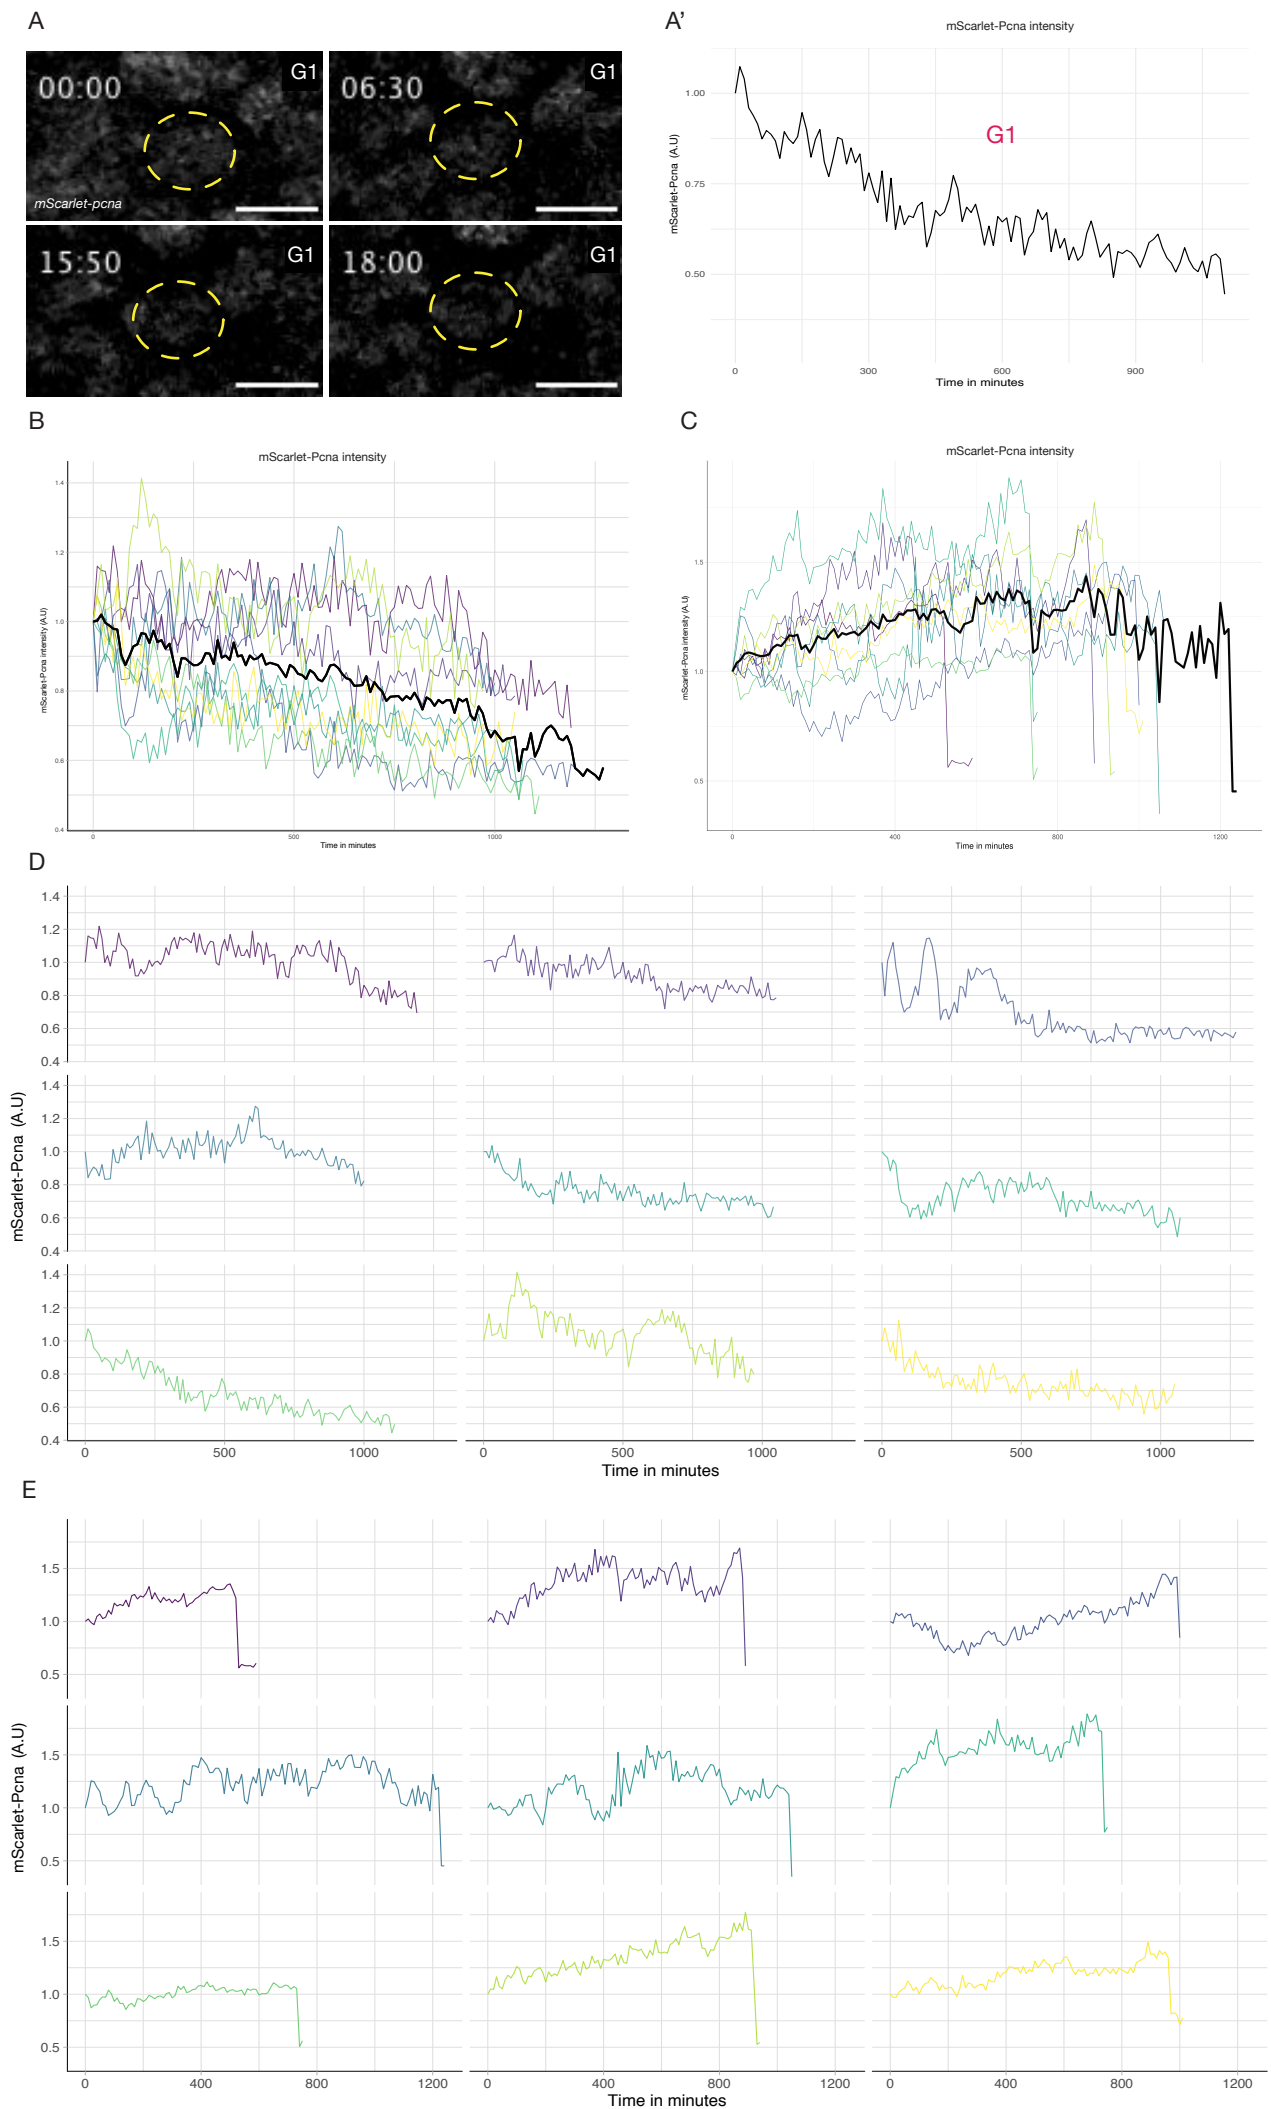

Seleit et al., Supp. Figure 9

Supplement: supp [file elife-75050-supp-v2.zip]

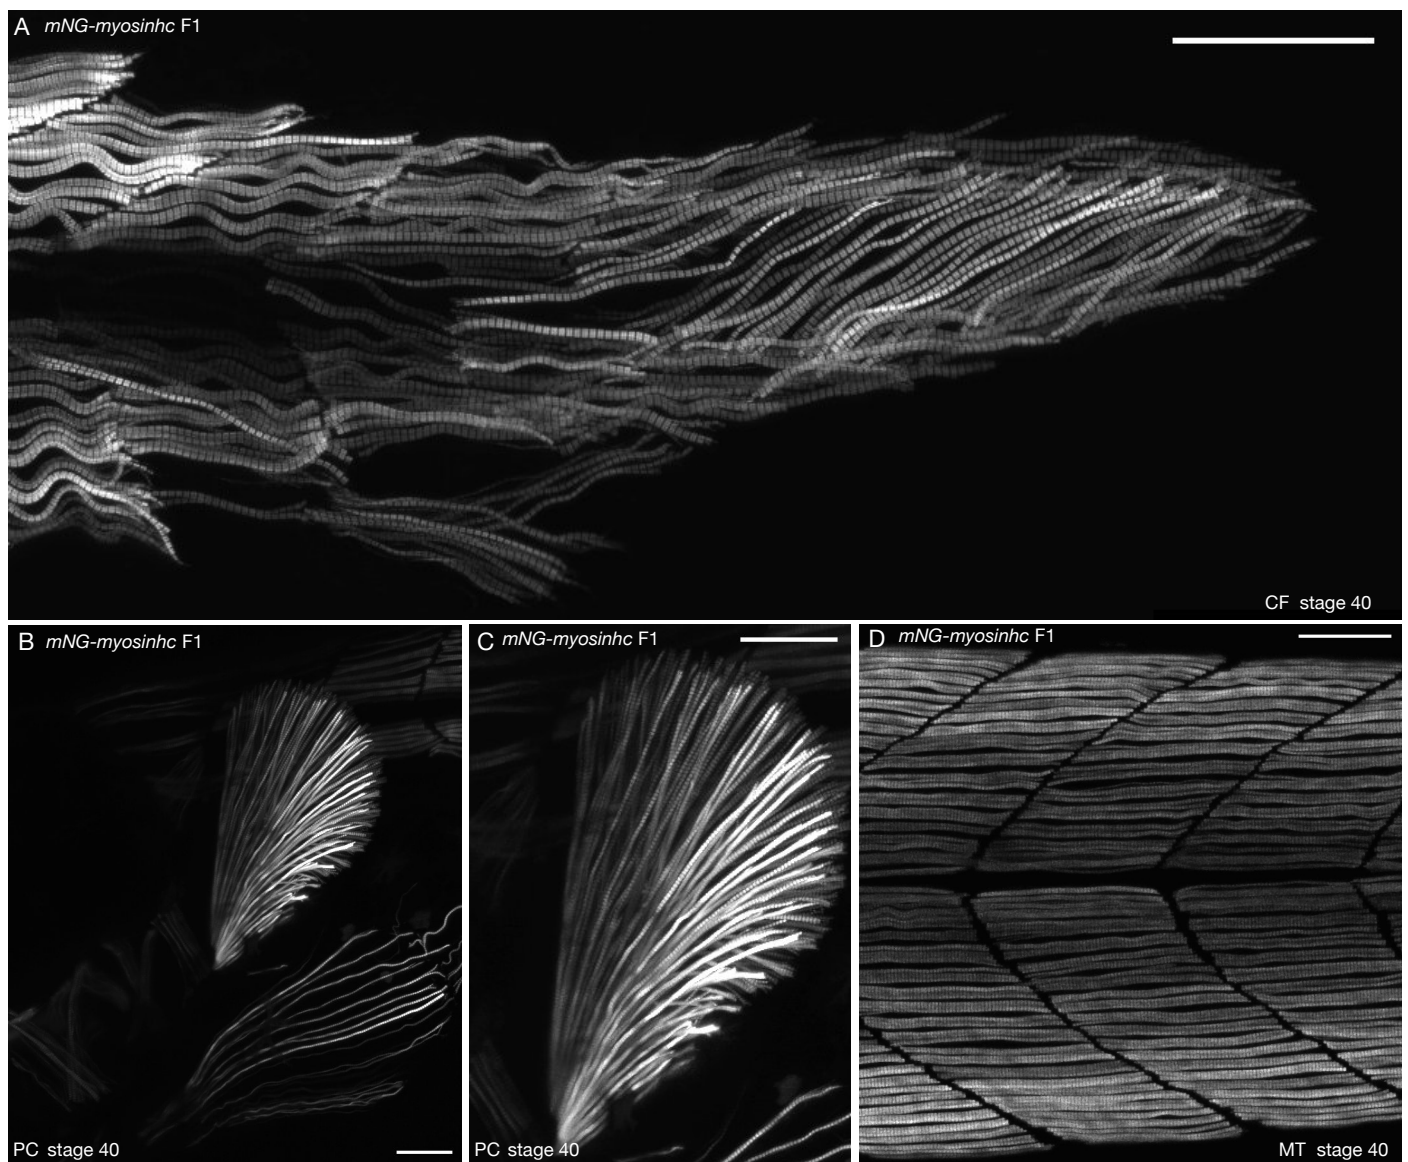

Supplement: supp [file elife-75050-supp-v2.zip]

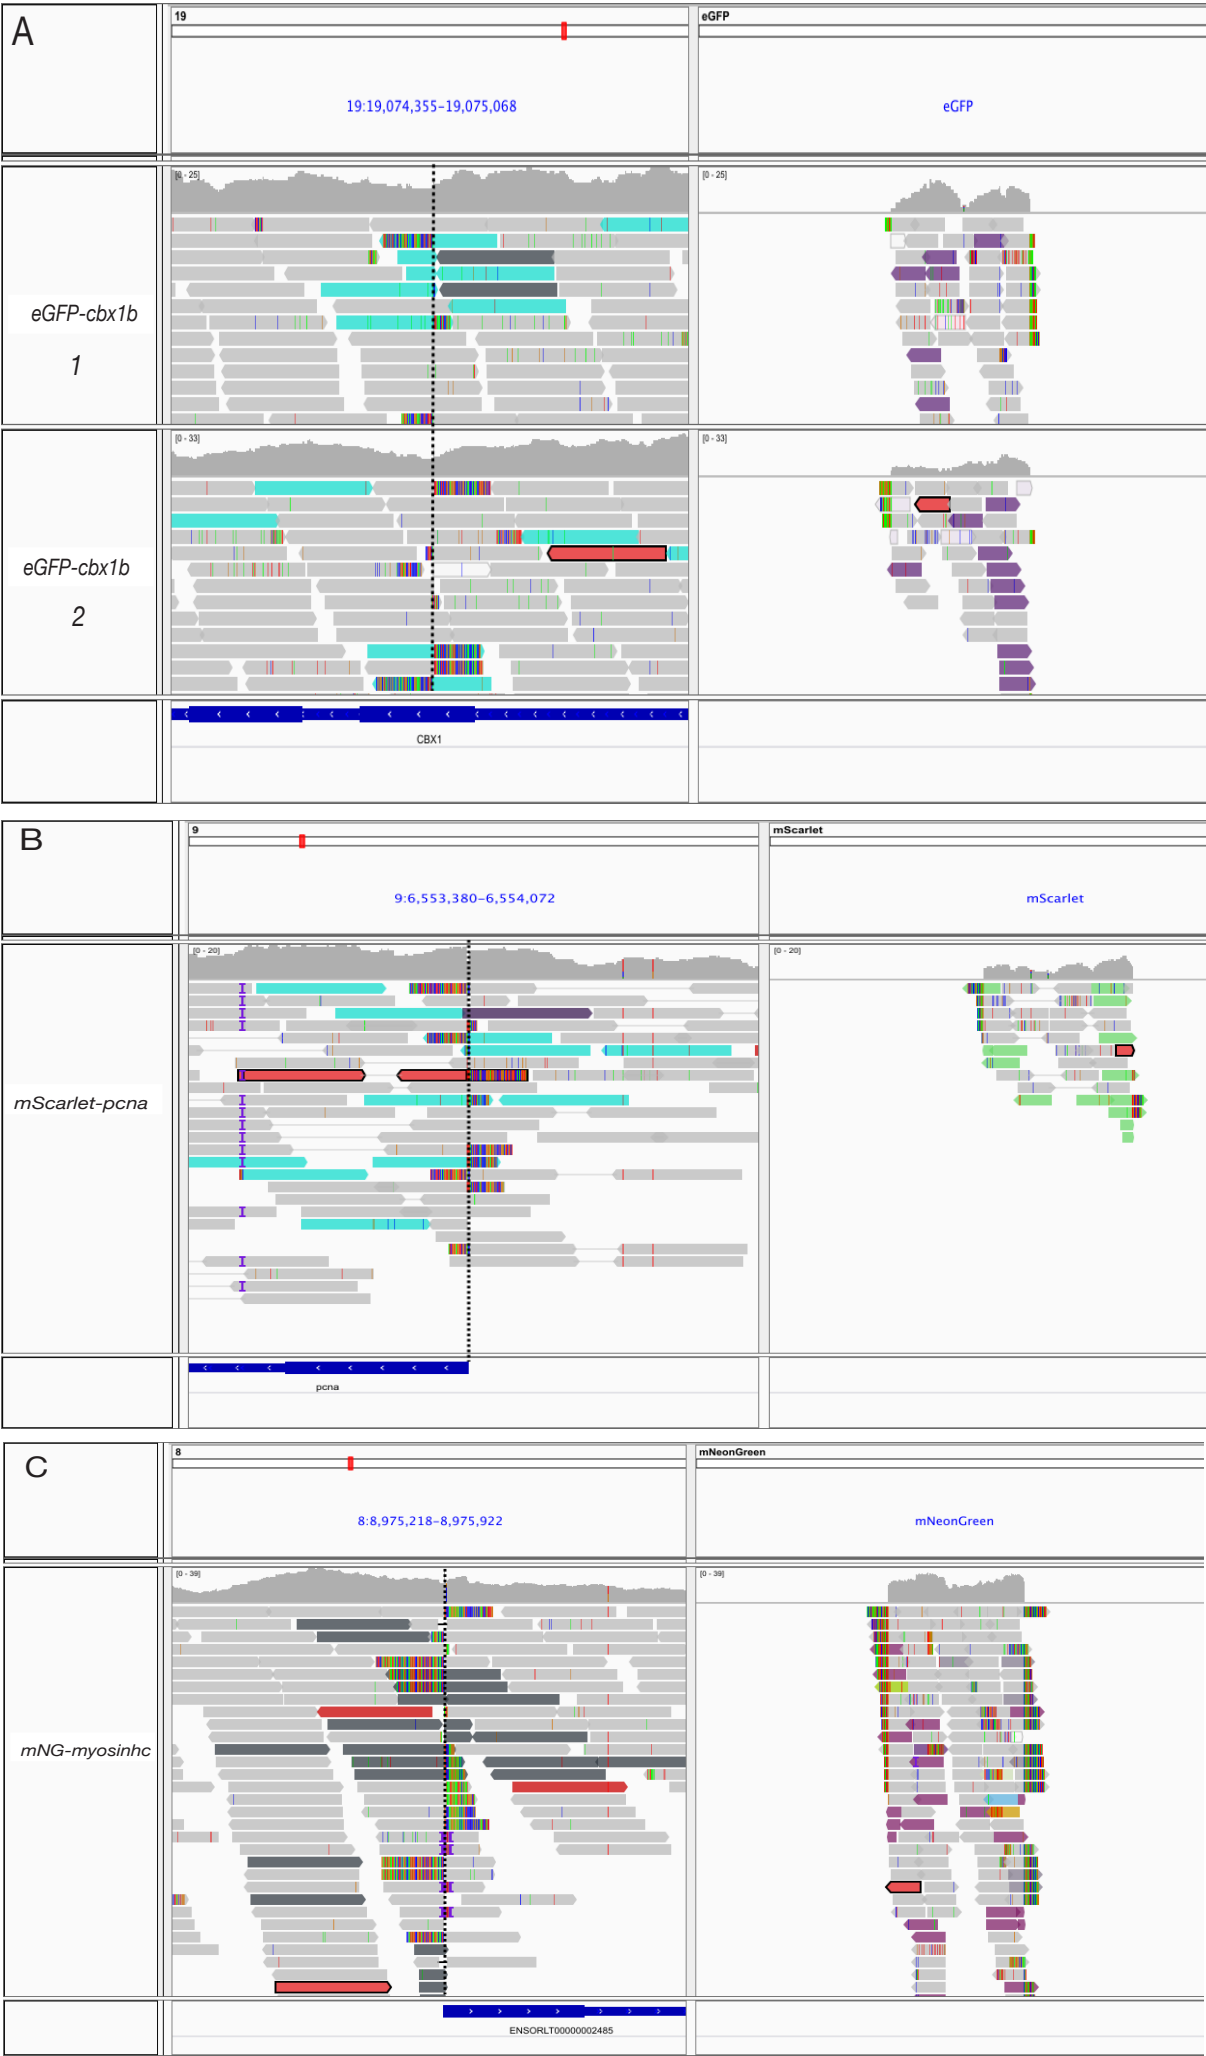

Seleit et al., Supp. Figure 2

Supplement: supp [file elife-75050-supp-v2.zip]

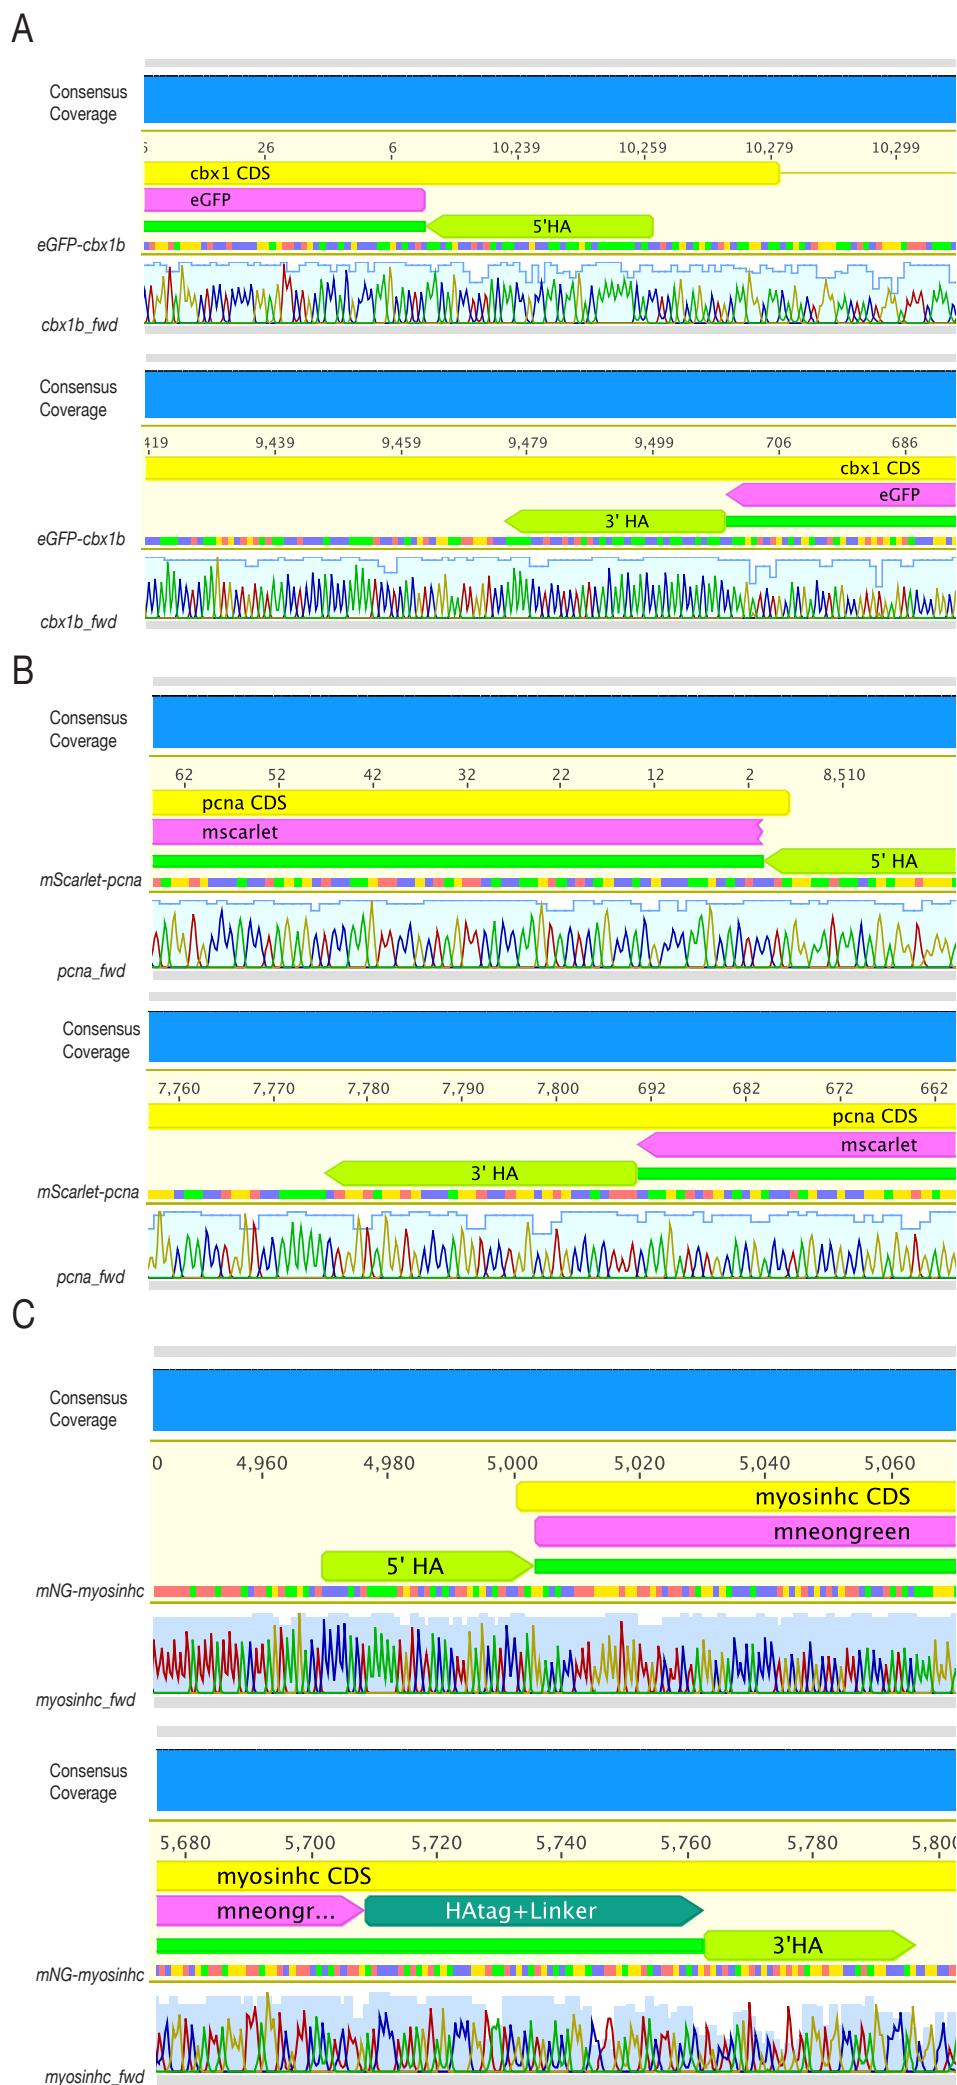

Seleit et al., Supp. Figure 3

Supplement: supp [file elife-75050-supp-v2.zip › elife_poa_e75050_Figure_1_figure_supplement_3.pdf]

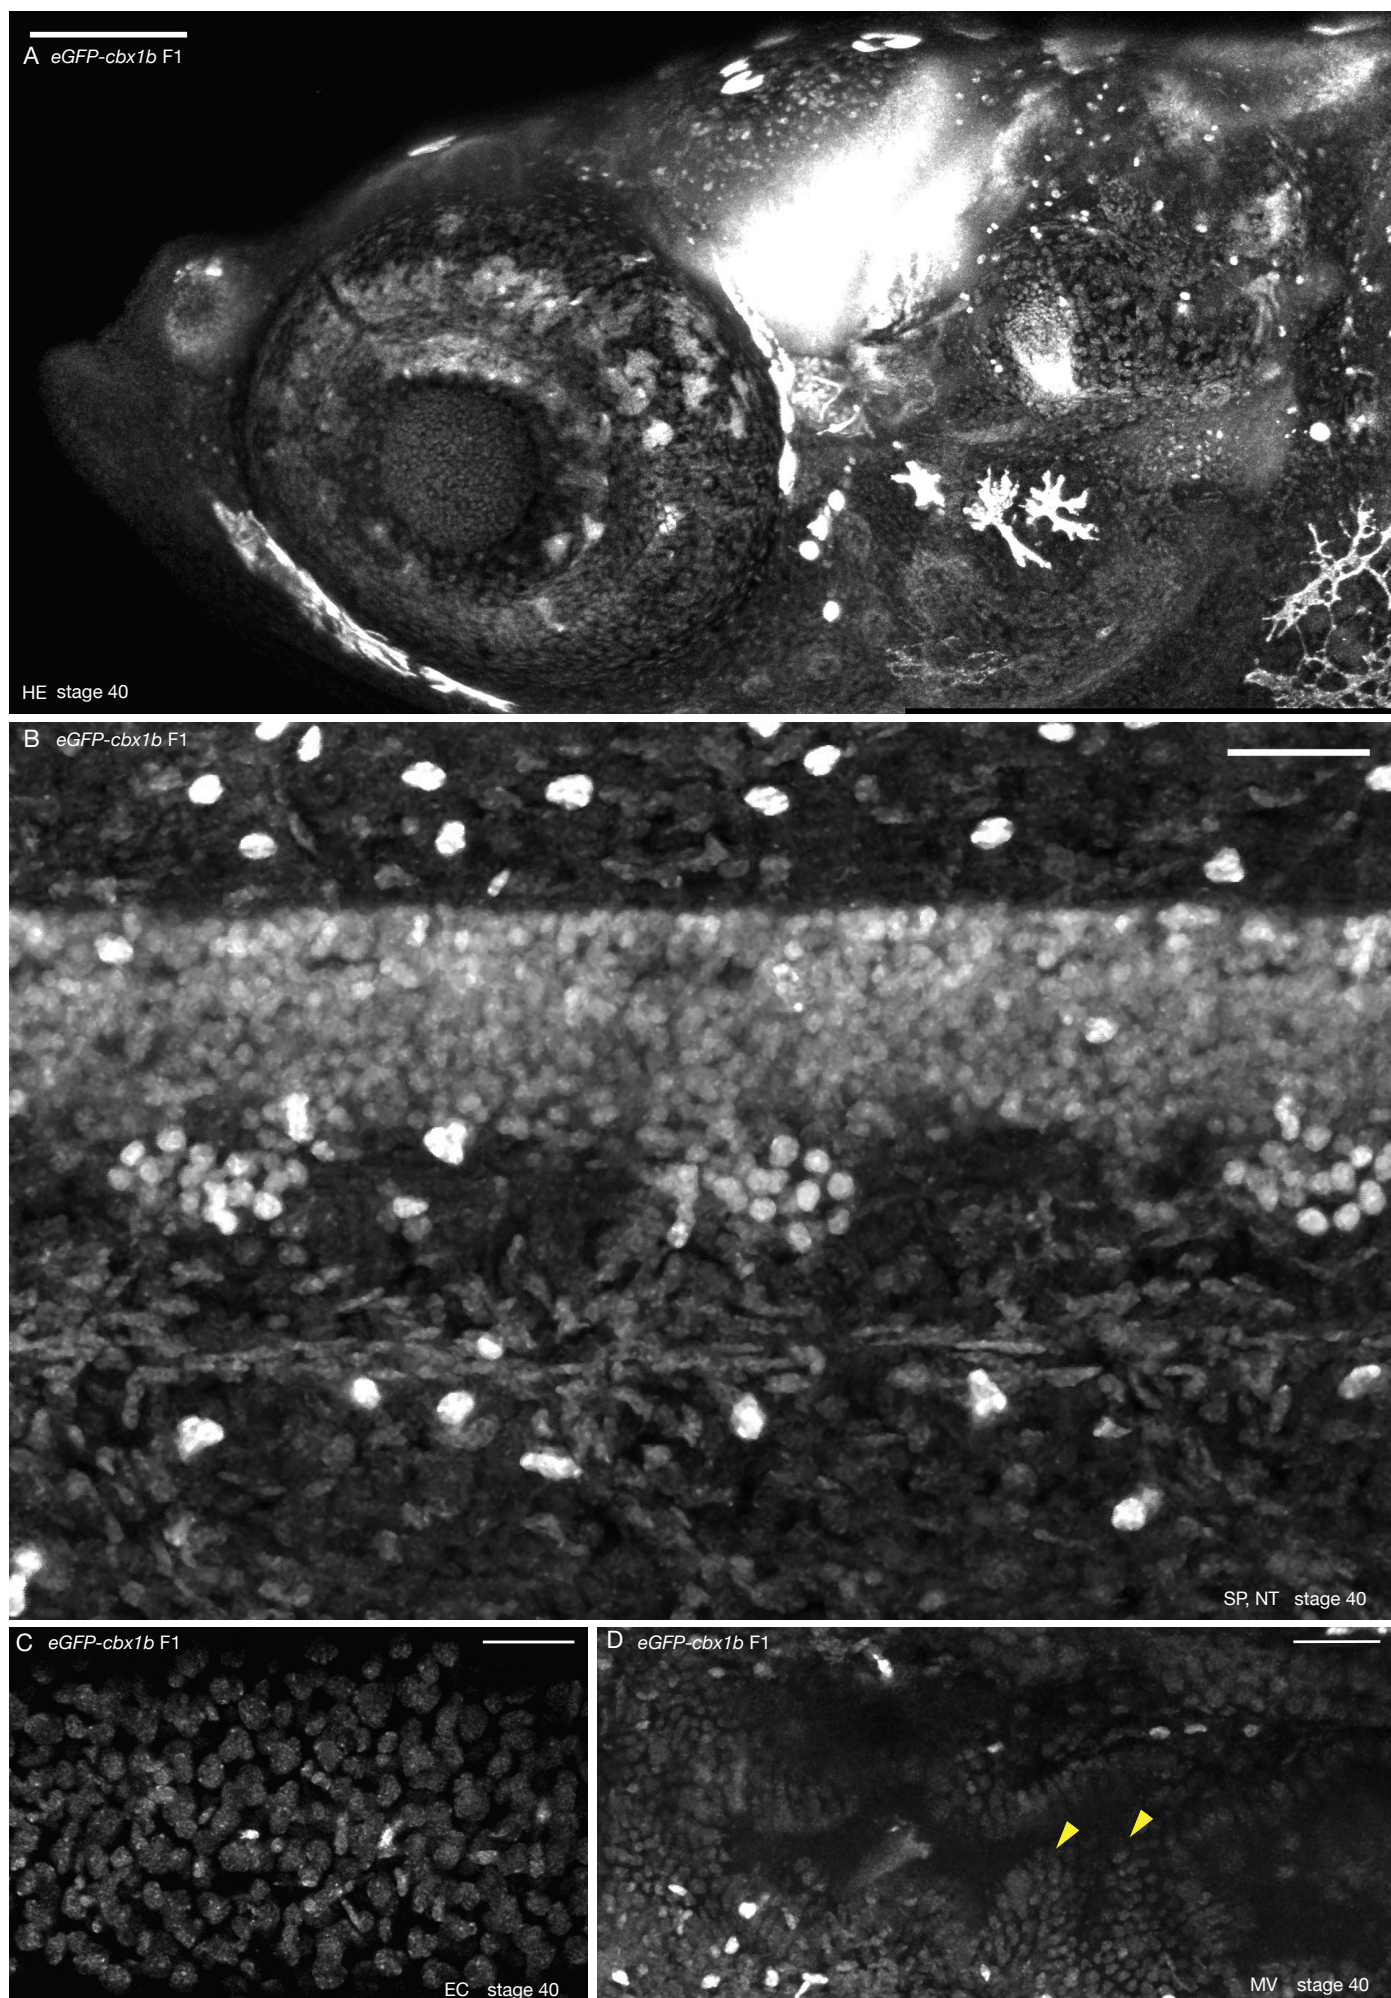

Supplement: supp [file elife-75050-supp-v2.zip › elife_poa_e75050_Figure_2_figure_supplement_1.pdf]

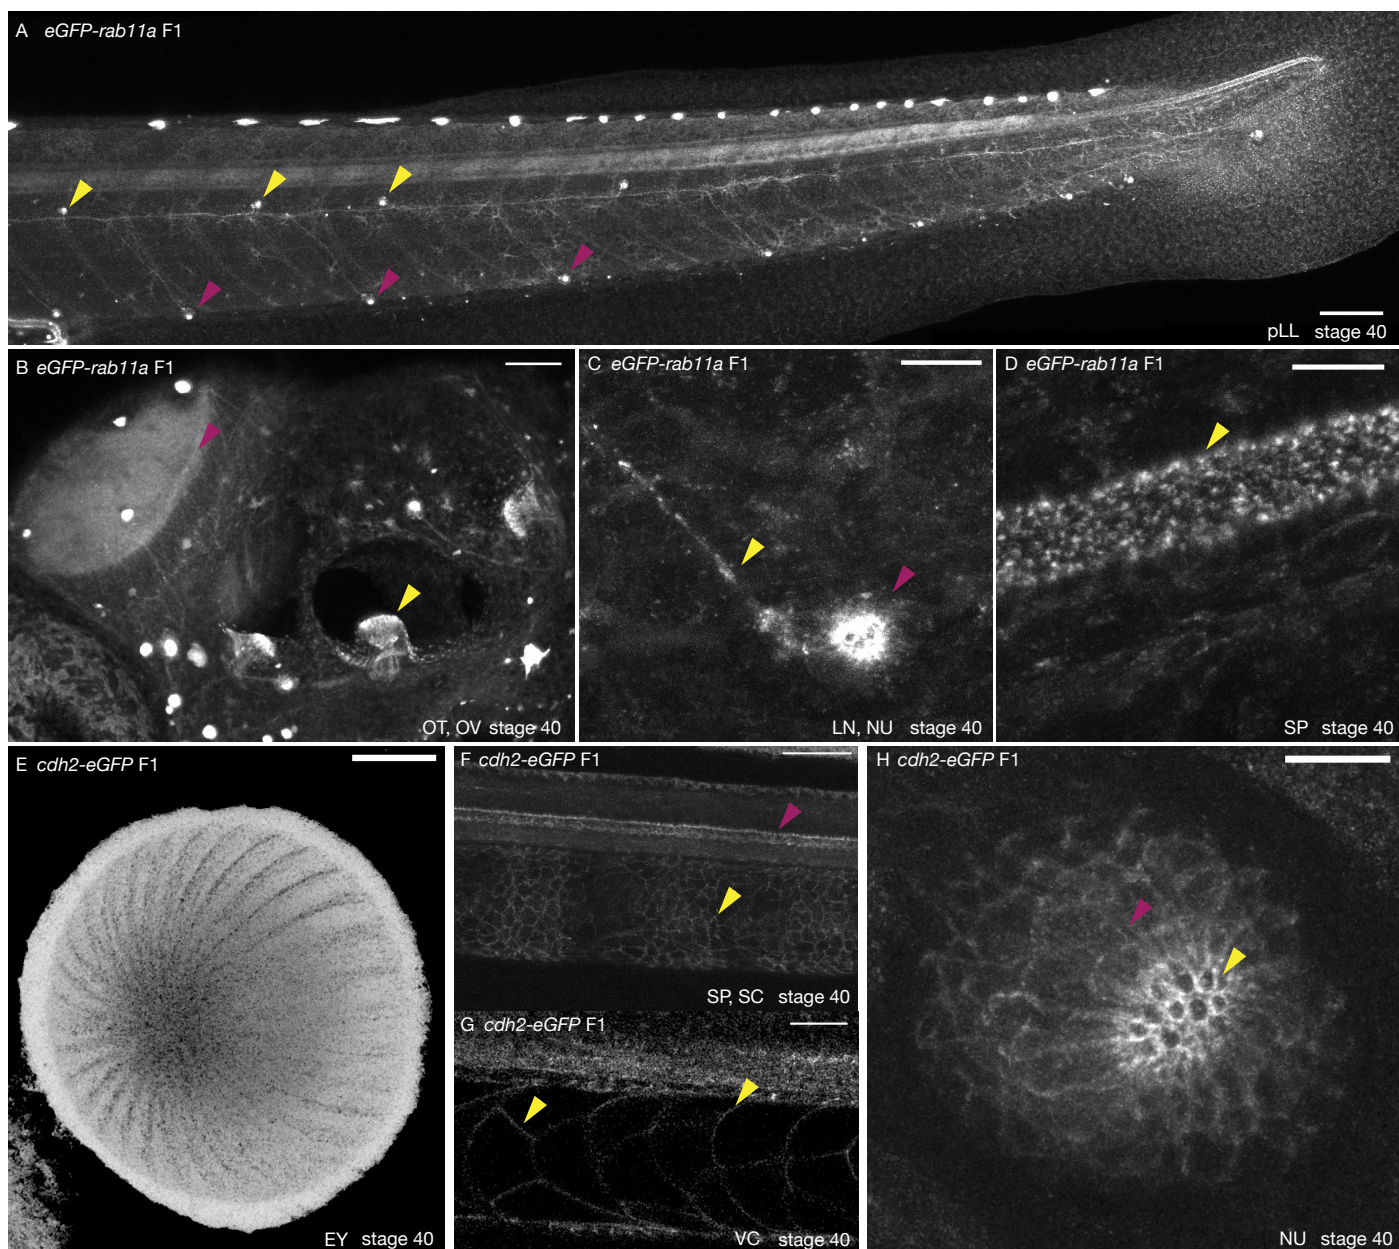

Supplement: supp [file elife-75050-supp-v2.zip › elife_poa_e75050_Figure_2_figure_supplement_3.pdf]

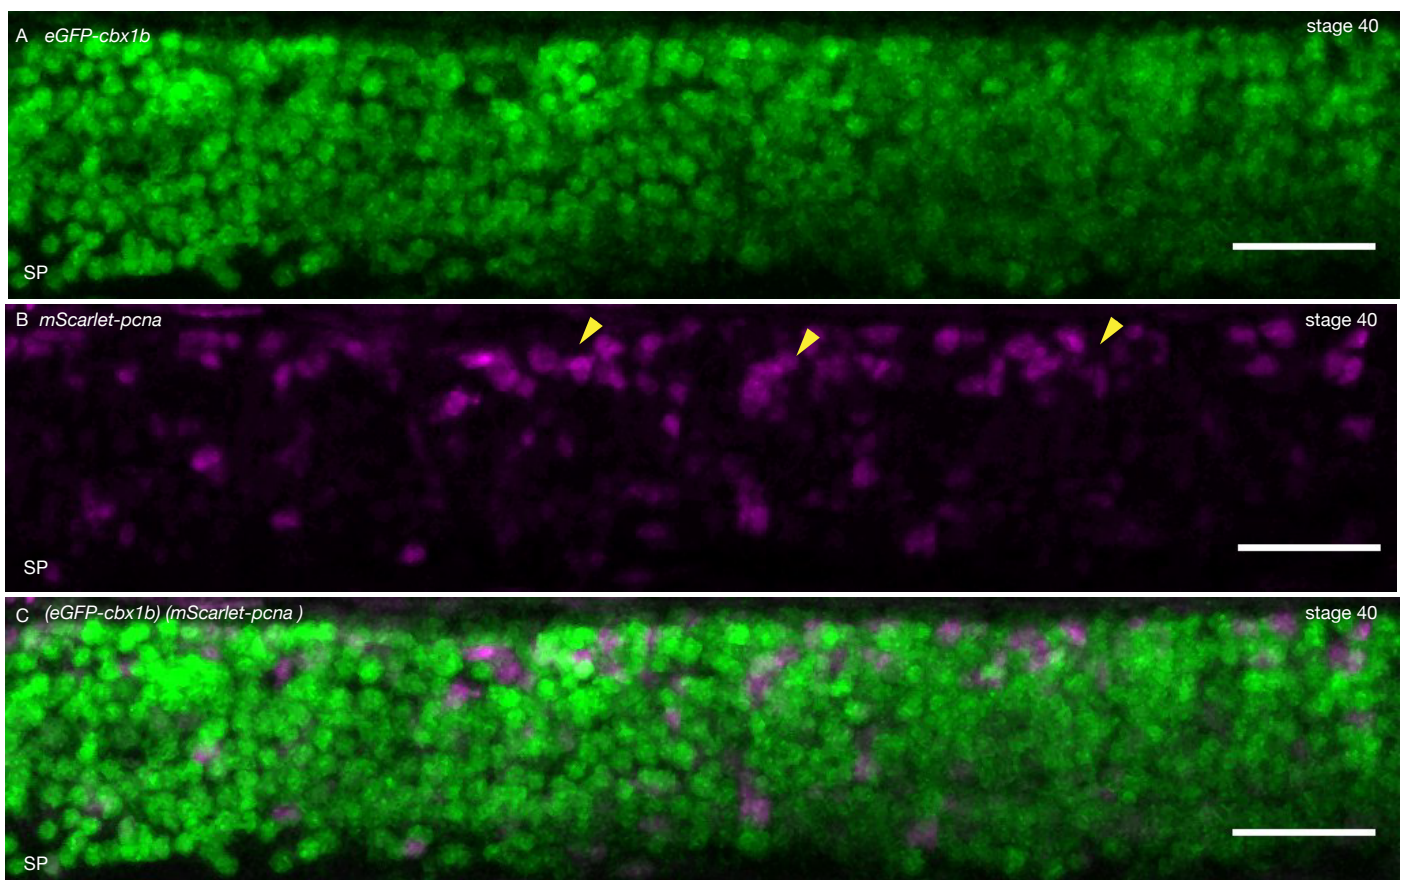

Supplement: supp [file elife-75050-supp-v2.zip › elife_poa_e75050_Figure_3_figure_supplement_1.pdf]

A

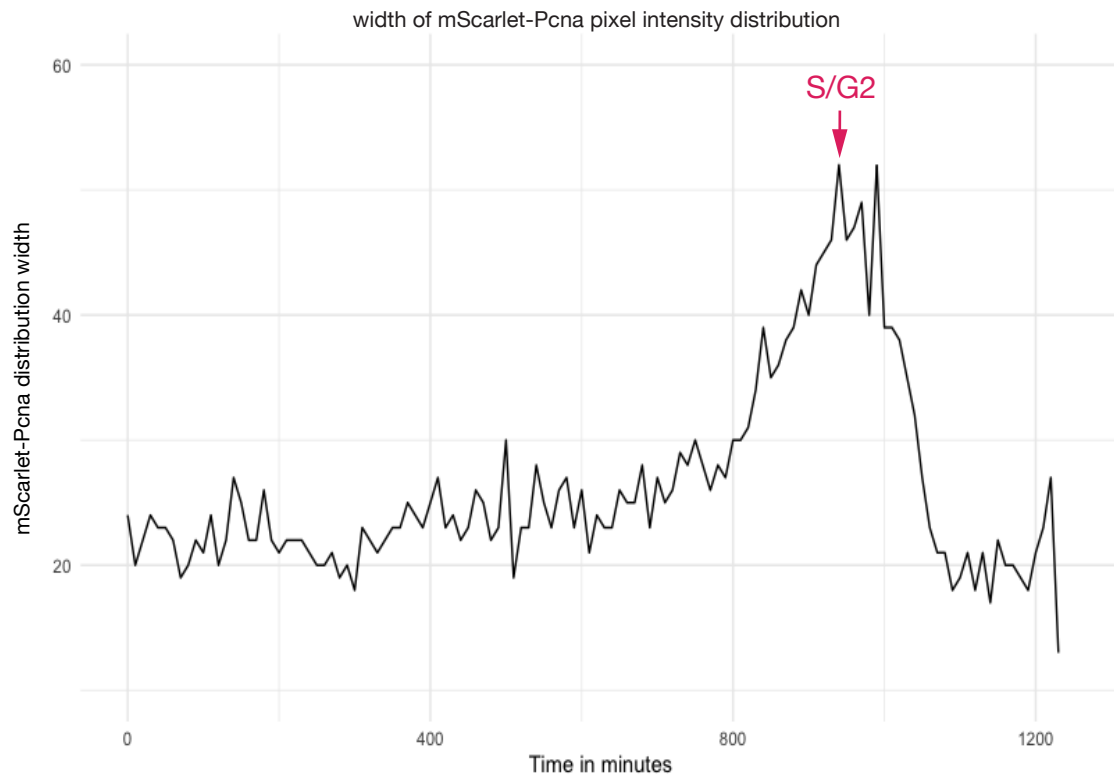

B

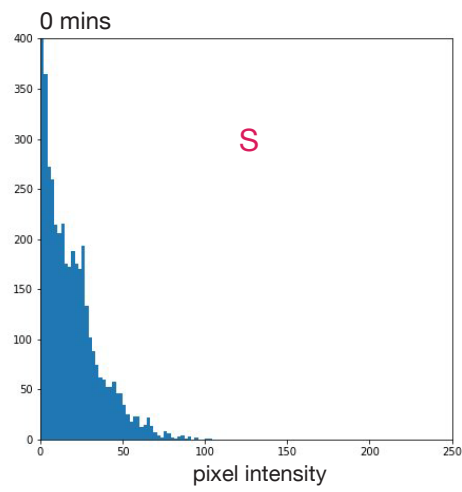

B'

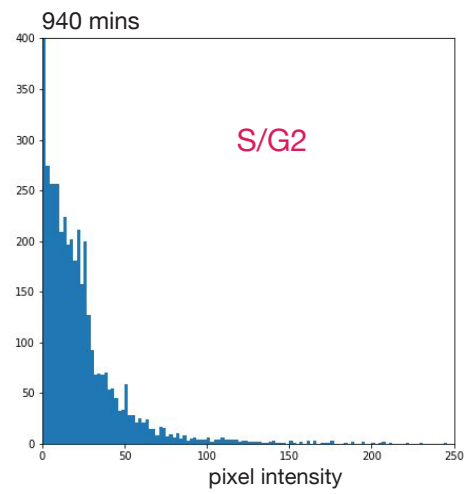

B''

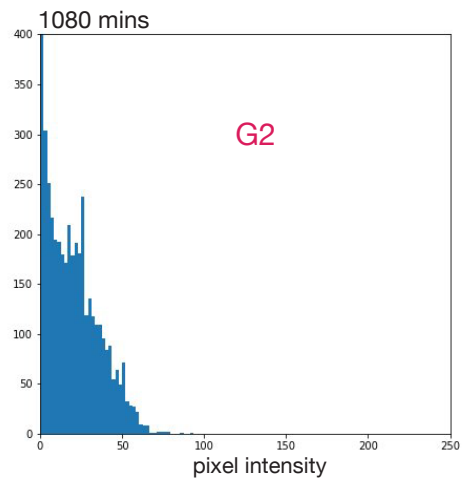

B'''

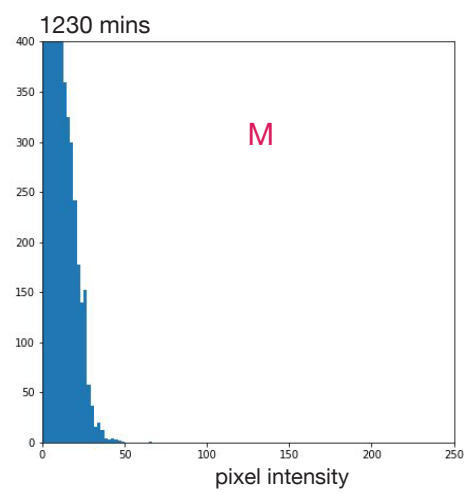

Supplement: supp [file elife-75050-supp-v2.zip › elife_poa_e75050_Figure_4_figure_supplement_2.pdf]

width of mScarlet-Pcna pixel intensity distribution

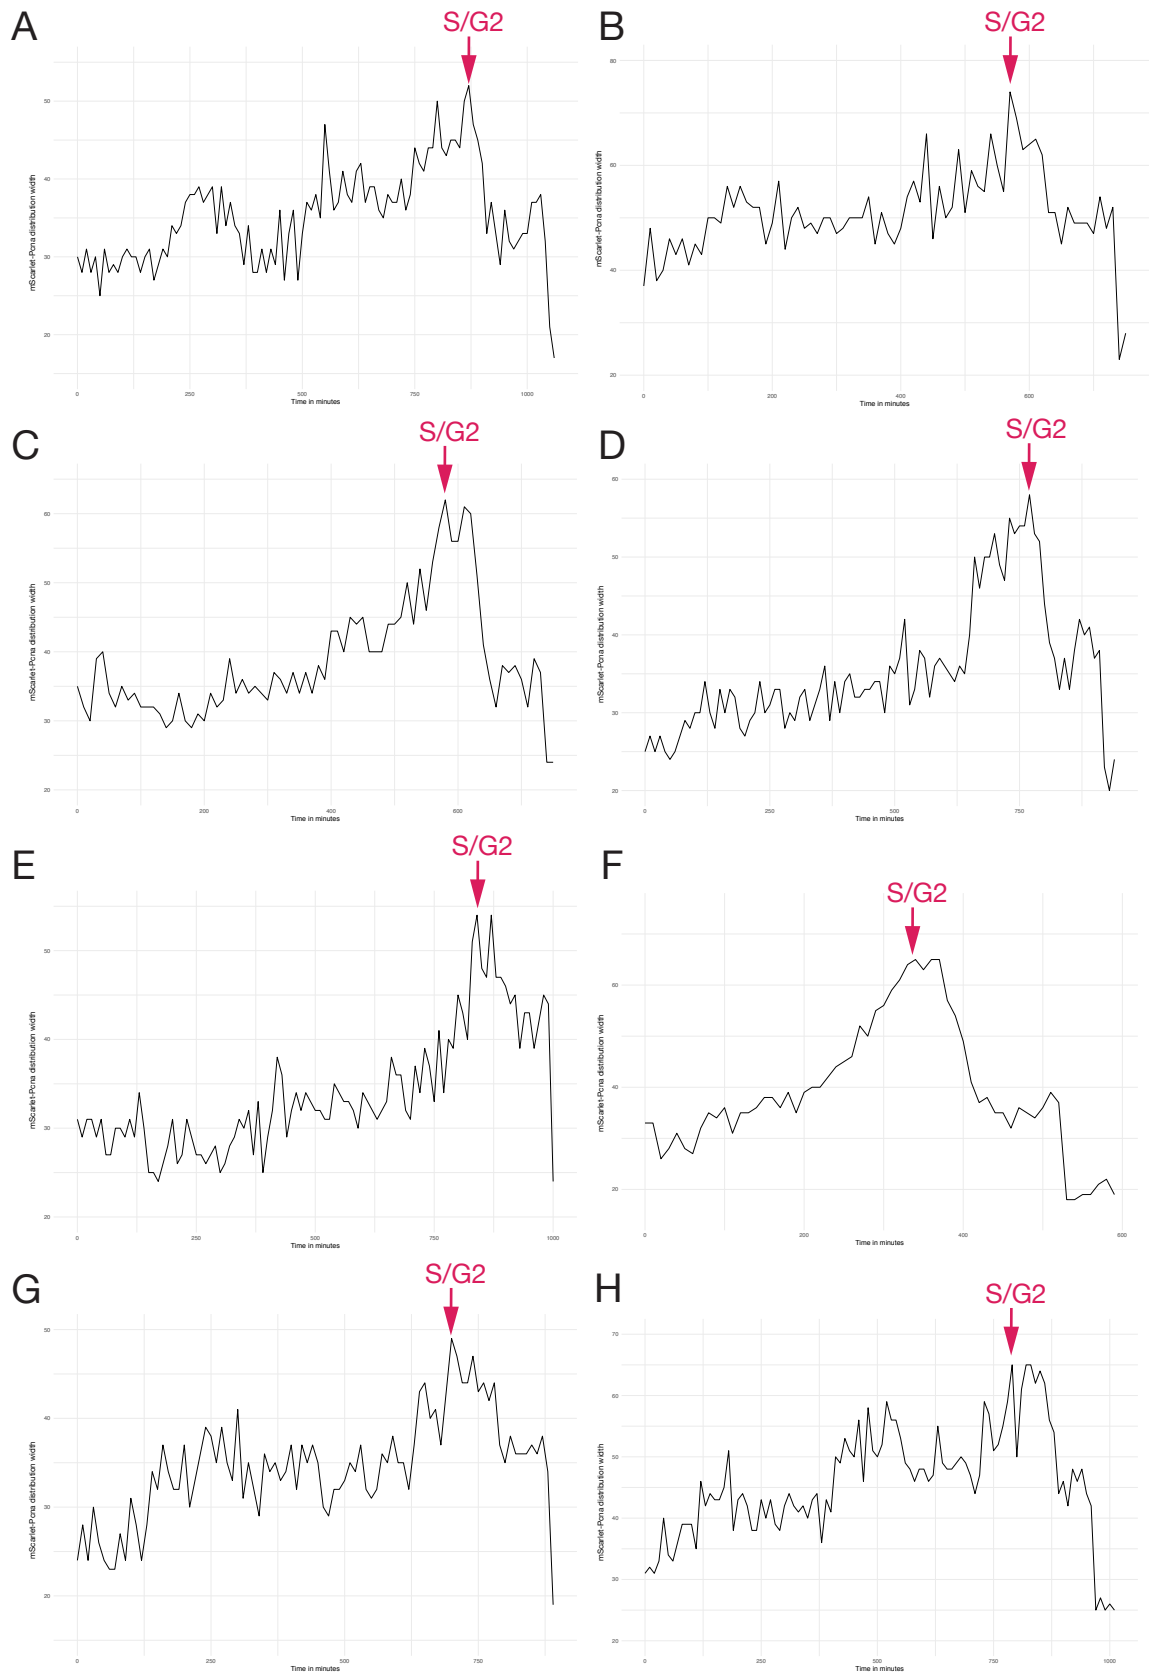

Supplement: supp [file elife-75050-supp-v2.zip › elife_poa_e75050_Figure_4_figure_supplement_3.pdf]
